# Supplementary material for: IGFBP2 is a Potential Master-Regulator Driving Dysregulated Gene Network Responsible for Short Survival in Glioblastoma Multiforme
Source: Preprints.org preprint supplement (doi:10.20944/preprints202010.0046.v1), 2020-10-02
Supplement: Supplementary file 2 [file supplementary]

## Sheet: supplementary-1A
Differentially Expressed Genes in GSE Dataset												LIMMA FOR GSE DATASET
ID	logFC	CI.025	CI.975	AveExpr	t	P.Value	adj.P.Val	B	modLog10P	signLog10P		ID	logFC	CI.025	CI.975	AveExpr	t	P.Value	adj.P.Val	B	modLog10P	signLog10P
CHI3L1	1.37086	0.692861	2.04885	12.2001	3.99108	9.73e-05	0.0127003	1.17934	4.01166	4.01166		A1BG	0.0525341	-0.0422838	0.147352	6.81581	1.09364	0.275645	0.549606	-5.43021	0.559649	0.559649
PDPN	1.24159	0.763588	1.71959	9.97615	5.12713	7.88e-07	0.00162742	5.50301	6.10331	6.10331		A1BG-AS1	0.00081383	-0.0751463	0.0767739	6.49417	0.0211482	0.983152	0.993165	-5.9927	0.00737932	0.00737932
MEOX2	1.1596	0.501049	1.81815	6.57453	3.47571	0.000645	0.0281911	-0.492226	3.19012	3.19012		A1CF	-0.0572192	-0.141232	0.0267935	6.93644	-1.34438	0.180602	0.440658	-5.14422	0.743278	-0.743278
IGFBP2	1.14966	0.605157	1.69416	11.1905	4.1677	4.87e-05	0.0107962	1.79588	4.31225	4.31225		A2M	0.124356	-0.0833283	0.332041	12.3852	1.18192	0.238874	0.51017	-5.33611	0.621831	0.621831
COL6A2	1.04792	0.546363	1.54948	9.10294	4.12414	5.79e-05	0.0110105	1.64183	4.23724	4.23724		A2M-AS1	-0.0626902	-0.209626	0.084246	6.32715	-0.842163	0.40087	0.659871	-5.65874	0.396996	-0.396996
FZD7	0.970682	0.556918	1.38445	8.92657	4.63073	7.17e-06	0.00482562	3.51215	5.14426	5.14426		A2ML1	-0.053018	-0.134	0.0279644	6.09967	-1.29228	0.197999	0.460659	-5.20839	0.703338	-0.703338
LOX	0.950763	0.395502	1.50602	7.52464	3.37987	0.000898	0.0325477	-0.781355	3.04674	3.04674		A4GALT	-0.0168341	-0.107078	0.0734094	7.33097	-0.368214	0.713168	0.866611	-5.92891	0.146808	-0.146808
IGFBP3	0.947862	0.439408	1.45631	10.7874	3.67976	0.000312	0.0210421	0.146352	3.50531	3.50531		A4GNT	-0.0163185	-0.0623556	0.0297186	6.11604	-0.699677	0.485078	0.722662	-5.76209	0.314189	-0.314189
IGF2BP3	0.903243	0.40392	1.40257	7.73174	3.57066	0.000462	0.0246746	-0.198936	3.33512	3.33512		AAAS	0.0487247	-0.0326065	0.130056	8.61552	1.18254	0.238628	0.509998	-5.33542	0.622279	0.622279
BCAT1	0.873276	0.452297	1.29426	10.0951	4.09465	6.5e-05	0.0110105	1.53825	4.18678	4.18678		AACS	0.0170489	-0.146081	0.180179	8.4625	0.206294	0.836806	0.929662	-5.97282	0.0773751	0.0773751
DIRAS3	0.8712	0.455863	1.28654	8.48244	4.1404	5.43e-05	0.0110105	1.69917	4.26517	4.26517		AACSP1	-0.0107712	-0.0676967	0.0461543	4.57801	-0.373493	0.709243	0.864711	-5.92707	0.149205	-0.149205
GJB2	0.854335	0.340575	1.3681	6.66512	3.28241	0.00124733	0.0379109	-1.06817	2.90402	2.90402		AADAC	0.0158695	-0.0274219	0.0591608	5.6376	0.723581	0.47031	0.712974	-5.74608	0.327616	0.327616
MOXD1	0.853778	0.425815	1.28174	8.83143	3.9379	0.000119	0.0141013	0.997962	3.92303	3.92303		AADACL2	-0.00507949	-0.0430394	0.0328805	4.35014	-0.264131	0.791996	0.90906	-5.95997	0.101277	-0.101277
EMP3	0.848429	0.440273	1.25659	10.3525	4.10312	6.29e-05	0.0110105	1.56794	4.20125	4.20125		AADACP1	-0.0279423	-0.0786091	0.0227246	4.70649	-1.08859	0.277864	0.551781	-5.43539	0.556167	-0.556167
FABP5	0.84284	0.334439	1.35124	10.8028	3.27238	0.00128972	0.0381352	-1.09728	2.88951	2.88951		AADAT	0.0425263	-0.0581864	0.143239	8.22027	0.833486	0.40573	0.663791	-5.66558	0.391763	0.391763
FABP5P1	0.84284	0.334439	1.35124	10.8028	3.27238	0.00128972	0.0381352	-1.09728	2.88951	2.88951		AAGAB	0.0636418	-0.0460332	0.173317	8.16125	1.14541	0.253637	0.527465	-5.37591	0.595787	0.595787
FABP5P11	0.84284	0.334439	1.35124	10.8028	3.27238	0.00128972	0.0381352	-1.09728	2.88951	2.88951		AAK1	-0.0453486	-0.176128	0.0854308	10.0258	-0.684463	0.494608	0.728244	-5.77201	0.305739	-0.305739
FABP5P2	0.84284	0.334439	1.35124	10.8028	3.27238	0.00128972	0.0381352	-1.09728	2.88951	2.88951		AAMDC	-0.00313236	-0.11365	0.107385	8.40508	-0.0559456	0.95545	0.981088	-5.99143	0.0197919	-0.0197919
FABP5P7	0.84284	0.334439	1.35124	10.8028	3.27238	0.00128972	0.0381352	-1.09728	2.88951	2.88951		AAMP	0.0894186	0.0126207	0.166217	9.30192	2.29828	0.0227533	0.15764	-3.53866	1.64296	1.64296
ANXA1	0.839812	0.379849	1.29977	11.2141	3.604	0.00041	0.0238799	-0.0943511	3.38673	3.38673		AANAT	-0.0195545	-0.0705174	0.0314085	5.56002	-0.757385	0.449859	0.6991	-5.72252	0.346923	-0.346923
TSTD1	0.838944	0.471373	1.20651	8.24936	4.50523	1.22e-05	0.00633463	3.03309	4.91261	4.91261		AAR2	0.0579699	-0.0330909	0.149031	8.98098	1.2566	0.210609	0.475816	-5.25091	0.676523	0.676523
B3GNT5	0.833604	0.505624	1.16158	8.55208	5.01692	1.3e-06	0.00215958	5.04819	5.88465	5.88465		AARS	-0.0484234	-0.149509	0.0526626	10.8138	-0.945561	0.345704	0.612944	-5.57189	0.461296	-0.461296
LGALS3	0.824719	0.447692	1.20175	11.6688	4.31776	2.66e-05	0.00836113	2.33653	4.57502	4.57502		AARS2	0.0964863	0.00795692	0.185016	8.43803	2.15131	0.0328517	0.19169	-3.83825	1.48344	1.48344
PLA2G2A	0.821119	0.31317	1.32907	8.87339	3.19089	0.00168714	0.0443435	-1.33084	2.77285	2.77285		AARSD1	-0.0291799	-0.11831	0.0599507	7.81562	-0.646222	0.519	0.74784	-5.79597	0.284833	-0.284833
LOXL1	0.786679	0.351136	1.22222	8.12697	3.56527	0.000471	0.0247833	-0.215771	3.32681	3.32681		AASDH	0.00975653	-0.105865	0.125378	8.66889	0.166564	0.867909	0.942614	-5.97981	0.0615256	0.0615256
AEBP1	0.782898	0.401325	1.16447	10.1337	4.04998	7.75e-05	0.0119143	1.38255	4.11086	4.11086		AASDHPPT	-0.0750851	-0.209312	0.0591415	10.8149	-1.10418	0.271062	0.545673	-5.41936	0.566931	-0.566931
SHOX2	0.782338	0.398367	1.16631	7.93531	4.02181	8.64e-05	0.0120826	1.28506	4.06328	4.06328		AASS	0.137526	-0.0723689	0.34742	7.8216	1.29333	0.197639	0.460279	-5.20713	0.704128	0.704128
VEGFA	0.778333	0.344002	1.21266	11.8151	3.53728	0.00052	0.0257425	-0.302797	3.28382	3.28382		AATBC	0.0077001	-0.0770176	0.0924178	5.37535	0.17941	0.857827	0.93896	-5.97771	0.0666001	0.0666001
RAB34	0.757967	0.418104	1.09783	9.73283	4.40222	1.88e-05	0.00806204	2.64749	4.72585	4.72585		AATF	0.00278009	-0.100983	0.106543	9.3826	0.0528863	0.957884	0.981844	-5.99159	0.0186871	0.0186871
GPX8	0.756646	0.382017	1.13127	7.0446	3.98673	9.9e-05	0.0127185	1.16443	4.00439	4.00439		AATK	-0.188636	-0.381867	0.00459451	9.6599	-1.92697	0.0556377	0.249045	-4.2594	1.25463	-1.25463
RBP1	0.753726	0.315988	1.19146	9.74677	3.39879	0.000842	0.0315577	-0.724825	3.07481	3.07481		ABAT	-0.301708	-0.575716	-0.0277008	11.0678	-2.17345	0.0311182	0.185875	-3.79432	1.50699	-1.50699
SLC2A10	0.747846	0.396779	1.09891	8.36109	4.20482	4.2e-05	0.0105157	1.9282	4.37662	4.37662		ABCA1	0.246209	-0.0335273	0.525945	10.328	1.73732	0.0841266	0.303214	-4.58084	1.07507	1.07507
C1R	0.746405	0.345499	1.14731	9.90212	3.675	0.000318	0.0210421	0.131104	3.49781	3.49781		ABCA11P	-0.0132842	-0.130013	0.103444	6.55028	-0.224638	0.822529	0.9241	-5.96908	0.084849	-0.084849
CA3	0.746213	0.275011	1.21741	5.83013	3.12594	0.00208223	0.048404	-1.51325	2.68147	2.68147		ABCA12	-0.0263378	-0.0678284	0.0151529	4.21232	-1.25301	0.21191	0.477584	-5.25512	0.673849	-0.673849
PCOLCE2	0.74023	0.298611	1.18185	7.05549	3.3086	0.00114273	0.0364661	-0.991827	2.94206	2.94206		ABCA13	0.301576	-0.00125666	0.60441	4.43369	1.96571	0.0509476	0.238154	-4.18982	1.29288	1.29288
RARRES2	0.731194	0.398294	1.06409	8.5109	4.33556	2.47e-05	0.00836113	2.40165	4.60662	4.60662		ABCA17P	-0.15453	-0.327181	0.0181201	6.47128	-1.76673	0.0790525	0.2932	-4.53308	1.10208	-1.10208
SERPING1	0.72284	0.350065	1.09562	9.8946	3.82754	0.000181	0.0166707	0.628026	3.7419	3.7419		ABCA2	-0.199333	-0.491447	0.0927815	9.29708	-1.34695	0.179775	0.43934	-5.14099	0.745271	-0.745271
SEC61G	0.717047	0.332442	1.10165	11.7237	3.68008	0.000312	0.0210421	0.147407	3.50583	3.50583		ABCA3	-0.155208	-0.274784	-0.035633	9.15171	-2.56212	0.0112642	0.10847	-2.9546	1.9483	-1.9483
EFEMP1	0.710029	0.317271	1.10279	11.4138	3.56842	0.000466	0.024704	-0.205929	3.33167	3.33167		ABCA4	-0.0275437	-0.0909201	0.0358328	6.78012	-0.857865	0.392165	0.652981	-5.64619	0.406531	-0.406531
NAMPTP1	0.707751	0.292877	1.12263	10.6998	3.36736	0.000937	0.033134	-0.818591	3.02824	3.02824		ABCA5	0.299582	-0.0147107	0.613874	7.00355	1.88151	0.0615978	0.260861	-4.33935	1.21043	1.21043
COL5A2	0.700023	0.301586	1.09846	9.62288	3.46799	0.000663	0.02866	-0.51578	3.17846	3.17846		ABCA6	0.0977953	-0.0399143	0.235505	5.36151	1.40178	0.16279	0.418314	-5.07065	0.788372	0.788372
SMIM3	0.693187	0.32762	1.05875	9.41582	3.7429	0.000248	0.0188534	0.350217	3.60556	3.60556		ABCA7	0.0904501	-0.0216946	0.202595	7.00042	1.59205	0.113217	0.348457	-4.80537	0.946088	0.946088
MCUB	0.692861	0.349617	1.0361	8.81992	3.98446	9.99e-05	0.0127203	1.15664	4.00058	4.00058		ABCA8	0.235089	-0.180545	0.650724	8.88983	1.11647	0.265784	0.540267	-5.40657	0.575472	0.575472
GSAP	0.691998	0.412157	0.971839	9.09532	4.88112	2.4e-06	0.00287106	4.49765	5.61965	5.61965		ABCA9	-0.0720337	-0.226431	0.0823632	6.33601	-0.920921	0.358386	0.623009	-5.59349	0.445649	-0.445649
CLIC1	0.683908	0.373944	0.993872	10.2946	4.35523	2.28e-05	0.00836113	2.4739	4.64168	4.64168		ABCB1	-0.136396	-0.341368	0.0685767	7.38882	-1.3135	0.19077	0.45173	-5.18255	0.719491	-0.719491
MDK	0.68322	0.365886	1.00055	8.76046	4.2498	3.51e-05	0.00931735	2.0898	4.45519	4.45519		ABCB10	0.0877034	-0.0875618	0.262969	7.53848	0.987748	0.324668	0.59364	-5.5336	0.48856	0.48856
KCNE4	0.681596	0.316699	1.04649	8.06292	3.68707	0.000304	0.0209371	0.169825	3.51687	3.51687		ABCB11	0.00524309	-0.044215	0.0547012	5.72401	0.209255	0.834498	0.929254	-5.97223	0.0785747	0.0785747
ABCC3	0.670663	0.287154	1.05417	9.63607	3.45186	0.000701	0.0295172	-0.564814	3.15417	3.15417		ABCB4	0.00572768	-0.17204	0.183495	7.12365	0.0635993	0.949363	0.978441	-5.991	0.0225675	0.0225675
FKBP9	0.662347	0.420654	0.904041	10.076	5.40936	2.1e-07	0.000904	6.69959	6.67763	6.67763		ABCB5	-0.0167376	-0.0863323	0.052857	6.47037	-0.474727	0.635586	0.824493	-5.88657	0.196826	-0.196826
FKBP9P1	0.662347	0.420654	0.904041	10.076	5.40936	2.1e-07	0.000904	6.69959	6.67763	6.67763		ABCB6	0.0102524	-0.0976071	0.118112	8.7492	0.187626	0.851392	0.93577	-5.97629	0.0698704	0.0698704
LDHA	0.658865	0.403684	0.914045	12.5875	5.09653	9.07e-07	0.00162742	5.37602	6.04228	6.04228		ABCB7	0.0609543	-0.0666183	0.188527	8.19357	0.943131	0.346941	0.613863	-5.57404	0.459744	0.459744
MIR4435-2HG	0.64815	0.280804	1.0155	9.33793	3.48278	0.00063	0.0280565	-0.47063	3.20081	3.20081		ABCB8	0.0829593	-0.000297438	0.166216	7.7425	1.96685	0.0508149	0.238101	-4.18776	1.29401	1.29401
CYTOR	0.647918	0.280435	1.0154	9.33777	3.48023	0.000635	0.028085	-0.478414	3.19696	3.19696		ABCB9	-0.0631139	-0.172373	0.0461453	7.52352	-1.14023	0.255781	0.530097	-5.38145	0.592131	-0.592131
OCIAD2	0.644019	0.237595	1.05044	9.64574	3.12784	0.00206959	0.048404	-1.50798	2.68411	2.68411		ABCC1	0.138821	-7.30817e-05	0.277715	9.14602	1.97286	0.0501193	0.235973	-4.17683	1.3	1.3
PLP2	0.641143	0.325789	0.956497	9.58036	4.01312	8.94e-05	0.0124157	1.2551	4.04866	4.04866		ABCC10	0.0863244	-0.0356356	0.208284	8.76905	1.39714	0.164176	0.420271	-5.0767	0.78469	0.78469
PDLIM4	0.640142	0.303409	0.976875	8.82121	3.75246	0.000239	0.0188266	0.381311	3.62083	3.62083		ABCC11	-0.0721292	-0.14268	-0.00157881	7.47171	-2.01807	0.045143	0.224474	-4.09368	1.34541	-1.34541
OSMR	0.634496	0.265123	1.00387	9.04504	3.3907	0.000865	0.0319529	-0.749043	3.06278	3.06278		ABCC12	0.00101708	-0.120713	0.122747	6.12624	0.0164923	0.986861	0.994755	-5.99278	0.0057441	0.0057441
TMEM158	0.632795	0.261294	1.0043	10.6631	3.36224	0.000953	0.0333196	-0.83379	3.02068	3.02068		ABCC13	-0.0965263	-0.16526	-0.0277922	5.81323	-2.77204	0.00618667	0.0818526	-2.44824	2.20854	-2.20854
TAGLN2P1	0.632363	0.342617	0.92211	10.6578	4.30798	2.77e-05	0.00851466	2.30085	4.5577	4.5577		ABCC2	-0.028427	-0.0992948	0.0424408	5.45538	-0.791784	0.429581	0.684212	-5.69745	0.366955	-0.366955
TAGLN2	0.627328	0.338559	0.916096	10.6604	4.28815	3e-05	0.00873153	2.22865	4.52264	4.52264		ABCC3	0.670663	0.287154	1.05417	9.63607	3.45186	0.000701186	0.0295172	-0.564814	3.15417	3.15417
DPYD	0.623349	0.235073	1.01163	9.21104	3.16895	0.00181206	0.0459638	-1.39283	2.74183	2.74183		ABCC4	-0.0136112	-0.192664	0.165442	7.42132	-0.150051	0.880901	0.948588	-5.98228	0.055073	-0.055073
FAM20C	0.622369	0.308404	0.936335	10.1411	3.91284	0.000131	0.0147284	0.913209	3.88157	3.88157		ABCC5	-0.0404582	-0.154566	0.0736492	9.36888	-0.699871	0.484957	0.722662	-5.76197	0.314297	-0.314297
PLOD2	0.621726	0.261411	0.982042	9.96679	3.40597	0.000821	0.0314555	-0.703298	3.08549	3.08549		ABCC6	0.0262504	-0.115574	0.168075	7.43785	0.365351	0.7153	0.867565	-5.9299	0.145512	0.145512
SERPINH1	0.621159	0.306356	0.935962	9.67207	3.89483	0.000141	0.0150023	0.852562	3.85189	3.85189		ABCC6P1	0.0262504	-0.115574	0.168075	7.43785	0.365351	0.7153	0.867565	-5.9299	0.145512	0.145512
TRIP6	0.615153	0.368569	0.861736	9.8547	4.9243	1.98e-06	0.0028104	4.67151	5.70338	5.70338		ABCC6P2	0.0262504	-0.115574	0.168075	7.43785	0.365351	0.7153	0.867565	-5.9299	0.145512	0.145512
PCOLCE	0.614108	0.246252	0.981963	8.66333	3.29528	0.00119486	0.0371685	-1.03072	2.92268	2.92268		ABCC8	-0.39086	-0.640958	-0.140762	7.96169	-3.08486	0.00237466	0.0522133	-1.62692	2.6244	-2.6244
GJC1	0.610004	0.318563	0.901445	9.06533	4.13149	5.63e-05	0.0110105	1.66774	4.24986	4.24986		ABCC9	-0.023947	-0.158827	0.110933	5.96156	-0.350453	0.726429	0.873826	-5.93494	0.138807	-0.138807
IGFBP5	0.609723	0.28383	0.935615	11.9068	3.69303	0.000298	0.0206691	0.188962	3.52628	3.52628		ABCD1	0.0401649	-0.0598173	0.140147	8.09635	0.792957	0.428899	0.683685	-5.69658	0.367645	0.367645
PLAT	0.609378	0.223288	0.995467	9.44757	3.11547	0.00215342	0.049261	-1.54235	2.66687	2.66687		ABCD1P2	0.0244391	-0.0377235	0.0866017	6.10113	0.776036	0.438797	0.689901	-5.70906	0.357736	0.357736
CLEC5A	0.608804	0.234283	0.983325	7.03	3.20868	0.00159172	0.0430444	-1.28028	2.79813	2.79813		ABCD2	-0.0550011	-0.209356	0.0993541	4.86784	-0.703357	0.482788	0.7213	-5.75966	0.316244	-0.316244
PDIA4	0.607876	0.374273	0.841479	9.90452	5.13644	7.55e-07	0.00162742	5.54177	6.12194	6.12194		ABCD3	0.225053	0.0721785	0.377928	10.5292	2.90586	0.00414606	0.0674079	-2.10655	2.38236	2.38236
C1RL	0.605629	0.305719	0.905539	8.2905	3.98603	9.93e-05	0.0127185	1.16204	4.00322	4.00322		ABCD4	0.0815963	-0.0343142	0.197507	8.56062	1.38955	0.166469	0.422419	-5.08658	0.778667	0.778667
CNIH3	0.604579	0.244585	0.964573	7.88458	3.31499	0.00111846	0.036022	-0.973103	2.95138	2.95138		ABCE1	0.10117	-0.0435028	0.245843	9.49438	1.38035	0.169275	0.426178	-5.09846	0.771406	0.771406
G0S2	0.604017	0.274427	0.933607	8.35834	3.61743	0.000391	0.0231971	-0.0519766	3.40762	3.40762		ABCF1	0.0471948	-0.0607255	0.155115	9.82228	0.86321	0.389228	0.650657	-5.64187	0.409795	0.409795
FMOD	0.598493	0.321452	0.875533	8.16981	4.26423	3.31e-05	0.00889938	2.14192	4.48051	4.48051		ABCF2	0.231313	0.0967478	0.365879	9.38599	3.39307	0.000858424	0.0318045	-0.741967	3.0663	3.0663
STEAP3	0.597696	0.282464	0.912927	9.08809	3.74262	0.000248	0.0188534	0.349299	3.60511	3.60511		ABCF3	0.08501	0.00782409	0.162196	8.51724	2.17399	0.0310772	0.185773	-3.79325	1.50756	1.50756
FZD5	0.594926	0.272096	0.917756	7.80236	3.63759	0.000364	0.0221876	0.0118699	3.43909	3.43909		ABCG1	-0.10217	-0.299557	0.0952177	8.41063	-1.02171	0.308358	0.579929	-5.50157	0.510945	-0.510945
ANXA2	0.591004	0.220647	0.96136	11.6134	3.14989	0.00192752	0.0469364	-1.44638	2.715	2.715		ABCG2	-0.275973	-0.524185	-0.027762	8.8121	-2.19468	0.0295312	0.179518	-3.75179	1.52972	-1.52972
RNASE4	0.584807	0.268996	0.900618	7.71961	3.6552	0.000341	0.0217459	0.0678574	3.46667	3.46667		ABCG4	-0.0917569	-0.192127	0.00861289	6.83704	-1.80452	0.0729057	0.282464	-4.4706	1.13724	-1.13724
BCL3	0.57498	0.309669	0.840292	8.02159	4.27782	3.13e-05	0.00873956	2.19114	4.50442	4.50442		ABCG5	-0.0228295	-0.0766098	0.0309509	5.05611	-0.83791	0.403248	0.661811	-5.6621	0.394428	-0.394428
LAMB2	0.568769	0.323311	0.814226	9.10549	4.57388	9.15e-06	0.00562515	3.29387	5.03876	5.03876		ABCG8	0.0153379	-0.0398744	0.0705502	5.468	0.548346	0.584168	0.791216	-5.85106	0.233462	0.233462
UPP1	0.568302	0.259985	0.876619	8.6854	3.63837	0.000363	0.0221876	0.014345	3.44031	3.44031		ABHD1	-0.0244031	-0.0942148	0.0454086	7.06041	-0.689988	0.491135	0.726103	-5.76843	0.308799	-0.308799
FSTL1	0.565919	0.293574	0.838263	11.0063	4.10167	6.33e-05	0.0110105	1.56286	4.19877	4.19877		ABHD10	-0.0476691	-0.155845	0.0605065	9.43884	-0.869827	0.385612	0.647731	-5.63648	0.41385	-0.41385
MIR198	0.565919	0.293574	0.838263	11.0063	4.10167	6.33e-05	0.0110105	1.56286	4.19877	4.19877		ABHD11	0.0291933	-0.0229992	0.0813857	8.88686	1.10408	0.271107	0.545712	-5.41946	0.56686	0.56686
PAXIP1-AS2	0.564248	0.356333	0.772164	7.59352	5.35684	2.7e-07	0.000967	6.47354	6.56922	6.56922		ABHD12	0.0222719	-0.118794	0.163337	10.0807	0.311646	0.755689	0.890852	-5.94706	0.121657	0.121657
RIPOR3	0.560161	0.256195	0.864127	7.21153	3.63759	0.000364	0.0221876	0.0118454	3.43908	3.43908		ABHD12B	-0.0336218	-0.115344	0.0481003	4.44512	-0.812095	0.417863	0.673323	-5.68213	0.378966	-0.378966
ACSS3	0.552702	0.279942	0.825463	8.24693	3.99977	9.41e-05	0.0125086	1.20918	4.02624	4.02624		ABHD13	-0.0786554	-0.22805	0.0707392	5.33984	-1.03925	0.300154	0.572067	-5.48461	0.522657	-0.522657
S100A11	0.551387	0.218704	0.88407	9.96365	3.27154	0.00129335	0.0381535	-1.09973	2.88829	2.88829		ABHD14A	-0.0684556	-0.228837	0.0919253	8.52302	-0.842523	0.400669	0.659668	-5.65845	0.397214	-0.397214
FZD1	0.5493	0.318816	0.779784	8.06778	4.70429	5.22e-06	0.00428148	3.79762	5.28212	5.28212		ABHD14A-ACY1	0.086738	-0.0257397	0.199216	8.30468	1.52219	0.129805	0.373458	-4.90657	0.88671	0.88671
MGARP	0.54717	0.214551	0.879788	7.16764	3.24714	0.00140237	0.0398777	-1.17018	2.85314	2.85314		ABHD14B	0.193656	0.033102	0.35421	8.90201	2.38087	0.018369	0.140167	-3.36219	1.73592	1.73592
NDRG1	0.545559	0.210989	0.880129	11.4412	3.2187	0.00154025	0.0422928	-1.25173	2.81241	2.81241		ABHD15	0.202921	0.0524941	0.353349	6.74766	2.66273	0.00848934	0.0948322	-2.71647	2.07113	2.07113
SAMD9L	0.542794	0.267885	0.817704	8.52354	3.89736	0.000139	0.0150023	0.861074	3.85606	3.85606		ABHD16A	0.160279	0.058767	0.26179	8.772	3.11663	0.00214544	0.0492352	-1.53914	2.66848	2.66848
SPATA6	0.541481	0.26797	0.814992	8.31045	3.90781	0.000134	0.0147284	0.896248	3.87327	3.87327		ABHD16B	-0.00273328	-0.0778099	0.0723434	5.42181	-0.0718628	0.942795	0.975749	-5.99047	0.0255828	-0.0255828
PYGL	0.541336	0.256337	0.826335	9.05429	3.74929	0.000242	0.0188266	0.370994	3.61577	3.61577		ABHD17A	-0.0111237	-0.116859	0.0946118	10.3943	-0.20766	0.835741	0.929477	-5.97255	0.0779284	-0.0779284
LIPG	0.537695	0.215227	0.860163	7.0045	3.29135	0.00121065	0.037336	-1.04217	2.91698	2.91698		ABHD17AP1	-0.0111237	-0.116859	0.0946118	10.3943	-0.20766	0.835741	0.929477	-5.97255	0.0779284	-0.0779284
EVA1C	0.536624	0.234223	0.839024	7.43492	3.50278	0.000587	0.0272328	-0.409294	3.23117	3.23117		ABHD17AP3	-0.0111237	-0.116859	0.0946118	10.3943	-0.20766	0.835741	0.929477	-5.97255	0.0779284	-0.0779284
MDFIC	0.536464	0.227765	0.845163	8.90396	3.43029	0.000755	0.0305999	-0.630128	3.12179	3.12179		ABHD17AP6	-0.0111237	-0.116859	0.0946118	10.3943	-0.20766	0.835741	0.929477	-5.97255	0.0779284	-0.0779284
TOM1L1	0.530941	0.252323	0.809558	7.18624	3.76151	0.000232	0.0188266	0.410855	3.63534	3.63534		ABHD17B	-0.0926778	-0.265926	0.0805704	9.09811	-1.05592	0.292489	0.564982	-5.46823	0.53389	-0.53389
CAVIN1	0.530324	0.275279	0.785368	10.1097	4.1044	6.26e-05	0.0110105	1.57244	4.20344	4.20344		ABHD17C	0.219132	0.00583003	0.432434	8.91517	2.02785	0.0441238	0.221659	-4.07547	1.35533	1.35533
PDGFA	0.529317	0.237057	0.821577	9.16711	3.57496	0.000455	0.0245601	-0.185489	3.34176	3.34176		ABHD18	0.0139762	-0.074512	0.102464	8.2188	0.311767	0.755597	0.890792	-5.94703	0.12171	0.12171
ADGRL2	0.52772	0.195528	0.859911	8.45852	3.13574	0.00201761	0.0480507	-1.48595	2.69516	2.69516		ABHD2	-0.0630566	-0.230777	0.104664	10.161	-0.742114	0.459034	0.706554	-5.73329	0.338155	-0.338155
PPIC	0.526751	0.228067	0.825436	8.9044	3.48111	0.000633	0.0280565	-0.475721	3.19829	3.19829		ABHD3	0.0288022	-0.130658	0.188262	9.10265	0.356532	0.721881	0.871423	-5.93291	0.141534	0.141534
MICALL2	0.526071	0.304828	0.747314	8.61206	4.69353	5.47e-06	0.00428148	3.75565	5.26186	5.26186		ABHD4	-0.035399	-0.160312	0.0895144	9.67445	-0.55938	0.576632	0.786154	-5.8453	0.239101	-0.239101
ZNF217	0.523732	0.208363	0.839102	8.05889	3.27805	0.00126562	0.0381352	-1.08085	2.8977	2.8977		ABHD5	-0.131694	-0.257655	-0.00573355	7.8722	-2.06375	0.0405486	0.212514	-4.00786	1.39202	-1.39202
TGIF1	0.520835	0.236118	0.805553	8.73166	3.61087	0.0004	0.0234262	-0.072685	3.39741	3.39741		ABHD6	-0.230958	-0.429893	-0.0320236	8.50391	-2.29165	0.0231424	0.159158	-3.55258	1.63559	-1.63559
MEST	0.519815	0.19111	0.848521	11.3887	3.12153	0.00211197	0.0488842	-1.52553	2.67531	2.67531		ABHD8	0.0290209	-0.095109	0.153151	7.95487	0.461488	0.645034	0.830173	-5.89241	0.190417	0.190417
DCBLD2	0.518898	0.213685	0.824111	8.88739	3.35586	0.000974	0.0336121	-0.852699	3.01128	3.01128		ABI1	-0.281599	-0.446276	-0.116922	9.75171	-3.37538	0.00091182	0.0328774	-0.794733	3.04009	-3.04009
COL6A1	0.518541	0.231122	0.805961	11.5486	3.56117	0.000478	0.0249181	-0.228555	3.3205	3.3205		ABI2	-0.0424385	-0.152884	0.0680067	11.1552	-0.75847	0.449211	0.69873	-5.72175	0.34755	-0.34755
ARAP3	0.515452	0.271196	0.759709	8.88626	4.16551	4.92e-05	0.0107962	1.78811	4.30847	4.30847		ABI3	0.0323953	-0.0527054	0.117496	8.09843	0.751406	0.453439	0.701454	-5.72676	0.343481	0.343481
EFHC1	0.515147	0.280223	0.750072	9.73074	4.32841	2.55e-05	0.00836113	2.37547	4.59392	4.59392		ABI3BP	-0.104059	-0.615423	0.407305	7.84181	-0.401675	0.688424	0.853615	-5.91676	0.162144	-0.162144
ECHDC2	0.514173	0.247782	0.780564	9.35341	3.80991	0.000194	0.0174911	0.56973	3.71331	3.71331		ABL1	0.144624	0.00199197	0.287256	10.2724	2.00147	0.0469196	0.228816	-4.12443	1.32865	1.32865
ADGRE5	0.513869	0.256355	0.771383	8.04089	3.93892	0.000119	0.0141013	1.00143	3.92472	3.92472		ABL2	-0.0681052	-0.182884	0.0466732	9.2422	-1.17124	0.243128	0.515663	-5.34788	0.614164	-0.614164
CFH	0.510185	0.188208	0.832162	7.61922	3.12772	0.00207037	0.048404	-1.50831	2.68395	2.68395		ABLIM1	-0.374135	-0.590091	-0.158179	10.6834	-3.41971	0.000783478	0.0308213	-0.662021	3.10597	-3.10597
LATS2	0.509808	0.252841	0.766775	9.07538	3.91611	0.00013	0.0147284	0.92423	3.88696	3.88696		ABLIM2	-0.140584	-0.338747	0.0575795	7.66731	-1.40035	0.163215	0.418957	-5.07251	0.787239	-0.787239
EFEMP2	0.501043	0.272846	0.72924	9.54451	4.33402	2.49e-05	0.00836113	2.39601	4.60389	4.60389		ABLIM3	-0.387177	-0.607064	-0.167289	8.10036	-3.47563	0.000645648	0.0281911	-0.492463	3.19	-3.19
IRX2	-0.503371	-0.802364	-0.204377	5.70896	-3.32316	0.00108816	0.0354368	-0.949144	2.96331	-2.96331		ABO	0.0458319	-0.0212197	0.112883	7.16554	1.34922	0.179045	0.438516	-5.13812	0.747039	0.747039
SLC24A4	-0.50342	-0.799995	-0.206845	6.67882	-3.35059	0.000992	0.0338015	-0.86829	3.00353	-3.00353		ABR	-0.149536	-0.314107	0.0150341	10.2441	-1.79358	0.0746436	0.285853	-4.48882	1.12701	-1.12701
PID1	-0.504001	-0.794631	-0.213372	8.43231	-3.42308	0.000774	0.0307931	-0.651864	3.11101	-3.11101		ABRA	0.0327254	-0.012958	0.0784088	4.69378	1.41401	0.159174	0.413763	-5.05458	0.798129	0.798129
CNTNAP2	-0.505083	-0.801253	-0.208913	6.7396	-3.36626	0.000941	0.033134	-0.821858	3.02661	-3.02661		ABRACL	0.244557	0.0122272	0.476886	7.84885	2.07778	0.0392198	0.209341	-3.98113	1.4065	1.4065
FAM13C	-0.506833	-0.799674	-0.213992	8.21737	-3.41631	0.000793	0.0308648	-0.672238	3.10091	-3.10091		ABRAXAS1	-0.0163387	-0.147579	0.114902	6.81601	-0.245739	0.806178	0.915798	-5.9644	0.093569	-0.093569
LINC01351	-0.509502	-0.777908	-0.241097	6.68728	-3.74697	0.000244	0.0188534	0.363434	3.61205	-3.61205		ABRAXAS2	-0.140249	-0.212986	-0.0675132	8.63424	-3.80606	0.000196298	0.0174911	0.557029	3.70708	-3.70708
LINC00645	-0.512861	-0.811164	-0.214558	4.92806	-3.39365	0.000857	0.0318045	-0.740222	3.06716	-3.06716		ABT1	0.0438133	-0.0353746	0.123001	8.45515	1.09213	0.276311	0.55026	-5.43177	0.558603	0.558603
MRVI1	-0.514902	-0.762483	-0.267322	9.70855	-4.1052	6.24e-05	0.0110105	1.57523	4.2048	-4.2048		ABTB1	0.0230026	-0.130965	0.17697	8.27942	0.2949	0.768427	0.89877	-5.95185	0.114397	0.114397
NDRG2	-0.519791	-0.838174	-0.201408	11.8769	-3.22258	0.00152071	0.0420633	-1.24063	2.81795	-2.81795		ABTB2	-0.0345445	-0.140334	0.0712445	7.94389	-0.644561	0.520073	0.748443	-5.79698	0.283936	-0.283936
DNAJC12	-0.521815	-0.792863	-0.250767	8.37803	-3.8001	0.000201	0.0174911	0.537391	3.69745	-3.69745		ACAA1	0.0383632	-0.057451	0.134177	9.30092	0.790333	0.430426	0.684742	-5.69853	0.366102	0.366102
GFRA1	-0.522388	-0.749035	-0.295741	7.92986	-4.54955	1.01e-05	0.00590001	3.20112	4.99391	-4.99391		ACAA2	0.283306	0.0969482	0.469664	9.33488	3.00077	0.00309494	0.0588531	-1.85543	2.50935	2.50935
RAB33A	-0.522472	-0.854516	-0.190427	7.7177	-3.10593	0.00222024	0.0499404	-1.56879	2.6536	-2.6536		ACACA	-0.109907	-0.244154	0.0243395	10.2164	-1.61602	0.107928	0.339956	-4.76961	0.966865	-0.966865
SLC7A14	-0.523021	-0.852851	-0.193192	7.52619	-3.13008	0.0020547	0.0482854	-1.50173	2.68725	-2.68725		ACACB	-0.0526002	-0.133036	0.0278356	9.1167	-1.29081	0.198507	0.460906	-5.21016	0.702225	-0.702225
PDE8B	-0.52621	-0.804896	-0.247523	9.73089	-3.72708	0.000263	0.0193099	0.298852	3.58032	-3.58032		ACAD10	0.00819488	-0.066215	0.0826048	7.21174	0.217389	0.828164	0.926505	-5.9706	0.0818837	0.0818837
GRIA4	-0.527484	-0.8347	-0.220268	7.61678	-3.38915	0.00087	0.03199	-0.753661	3.06049	-3.06049		ACAD11	0.115883	-0.0182279	0.249994	8.88422	1.70561	0.0898912	0.312132	-4.63145	1.04628	1.04628
EYA1	-0.527713	-0.828627	-0.226798	7.25323	-3.46162	0.000678	0.02908	-0.535164	3.16886	-3.16886		ACAD8	0.154019	0.0170081	0.29103	9.01324	2.21893	0.0278041	0.174189	-3.70272	1.55589	1.55589
STMN4	-0.529849	-0.864379	-0.195319	9.55466	-3.12638	0.0020793	0.048404	-1.51203	2.68208	-2.68208		ACAD9	0.0315185	-0.0599001	0.122937	9.16848	0.680545	0.497078	0.730435	-5.77453	0.303575	0.303575
RUNDC3B	-0.533699	-0.862134	-0.205264	7.24126	-3.20754	0.00159769	0.0430977	-1.28354	2.79651	-2.79651		ACADL	0.0993867	-0.068502	0.267275	5.85237	1.16851	0.244224	0.516421	-5.35087	0.612211	0.612211
KSR2	-0.538158	-0.87088	-0.205436	6.1622	-3.19266	0.00167737	0.044259	-1.3258	2.77537	-2.77537		ACADM	0.0828349	-0.0505835	0.216253	10.4279	1.22553	0.222058	0.490215	-5.28698	0.653534	0.653534
KCNJ10	-0.542302	-0.875775	-0.20883	9.66924	-3.21001	0.00158479	0.0429974	-1.27649	2.80003	-2.80003		ACADS	0.0516661	-0.0285286	0.131861	8.01325	1.2717	0.205202	0.469612	-5.23305	0.687819	0.687819
FAM155A	-0.543925	-0.843713	-0.244138	7.06646	-3.58139	0.000445	0.0243367	-0.165373	3.35169	-3.35169		ACADSB	-0.379225	-0.566186	-0.192263	7.67998	-4.00378	9.26906e-05	0.0125086	1.22295	4.03296	-4.03296
ZNF488	-0.544817	-0.858421	-0.231213	8.0994	-3.42921	0.000758	0.0305999	-0.633365	3.12019	-3.12019		ACADVL	0.115923	-0.0303241	0.262169	10.7359	1.56461	0.119518	0.358015	-4.84563	0.922567	0.922567
KCNJ9	-0.549163	-0.88254	-0.215787	7.08783	-3.25156	0.00138201	0.0395402	-1.15745	2.85949	-2.85949		ACAN	-0.0136202	-0.139156	0.111916	7.87365	-0.214161	0.830676	0.927397	-5.97125	0.0805681	-0.0805681
CYP7B1	-0.554854	-0.8919	-0.217807	6.14378	-3.24948	0.00139156	0.0396752	-1.16344	2.8565	-2.8565		ACAP1	-0.0218585	-0.130348	0.0866315	6.98129	-0.397701	0.691346	0.854428	-5.91826	0.160305	-0.160305
LRP1B	-0.561557	-0.825927	-0.297186	7.09647	-4.19281	4.41e-05	0.0105698	1.8853	4.35576	-4.35576		ACAP2	-0.00766622	-0.153151	0.137819	9.47975	-0.104013	0.91728	0.964695	-5.9878	0.0374979	-0.0374979
CUX2	-0.565366	-0.918818	-0.211914	6.28431	-3.15736	0.00188147	0.0463876	-1.42542	2.7255	-2.7255		ACAP3	-0.0845144	-0.287981	0.118952	9.85084	-0.819904	0.413409	0.669605	-5.67613	0.38362	-0.38362
LRRC3B	-0.566273	-0.924772	-0.207774	7.47653	-3.11791	0.00213667	0.0491388	-1.53559	2.67026	-2.67026		ACAT1	-0.0194344	-0.15297	0.114101	10.3397	-0.287275	0.774249	0.901298	-5.95395	0.11112	-0.11112
VXN	-0.566525	-0.880862	-0.252189	9.12342	-3.55754	0.000484	0.024973	-0.239857	3.31492	-3.31492		ACAT2	-0.114114	-0.273428	0.0452009	8.83461	-1.41386	0.159216	0.413773	-5.05477	0.798014	-0.798014
ARFGEF3	-0.567634	-0.909088	-0.22618	8.77174	-3.28142	0.00125147	0.0379109	-1.07106	2.90258	-2.90258		ACBD3	0.0202532	-0.080746	0.121252	9.57941	0.395822	0.692728	0.854782	-5.91896	0.159437	0.159437
SMOC1	-0.572922	-0.930792	-0.215053	9.19145	-3.16007	0.00186506	0.046322	-1.41782	2.72931	-2.72931		ACBD4	0.0144103	-0.0907288	0.119549	8.27859	0.270542	0.787069	0.907081	-5.95835	0.103987	0.103987
SGIP1	-0.573169	-0.849559	-0.29678	7.09815	-4.09343	6.54e-05	0.0110105	1.53398	4.18469	-4.18469		ACBD5	-0.328779	-0.510076	-0.147483	9.96022	-3.57965	0.000447707	0.0243367	-0.170811	3.34901	-3.34901
UNC80	-0.576431	-0.903279	-0.249584	7.4141	-3.48119	0.000633	0.0280565	-0.475484	3.19841	-3.19841		ACBD6	-0.024471	-0.128302	0.0793598	8.95507	-0.465211	0.642371	0.828054	-5.89078	0.192214	-0.192214
EPHB1	-0.576732	-0.935178	-0.218285	8.50448	-3.17596	0.00177124	0.0456455	-1.37306	2.75172	-2.75172		ACCS	0.211485	0.0544367	0.368533	8.11404	2.6581	0.0086019	0.0955935	-2.72759	2.06541	2.06541
MN1	-0.577639	-0.918728	-0.23655	7.23183	-3.34283	0.00101829	0.0343511	-0.891222	2.99213	-2.99213		ACD	-0.0499486	-0.16278	0.0628828	8.72281	-0.873813	0.383443	0.646411	-5.63321	0.416299	-0.416299
SPX	-0.585191	-0.953626	-0.216756	7.67802	-3.13518	0.00202126	0.0480507	-1.48752	2.69438	-2.69438		ACE	0.0872999	-0.0818756	0.256475	7.22177	1.0186	0.309831	0.581539	-5.50455	0.508876	0.508876
PCDH20	-0.586099	-0.929821	-0.242376	5.68303	-3.3658	0.000942	0.033134	-0.823216	3.02594	-3.02594		ACE2	-0.144004	-0.216721	-0.0712878	6.13361	-3.90902	0.000133273	0.0147284	0.900306	3.87526	-3.87526
MYOT	-0.586362	-0.921701	-0.251024	5.99455	-3.4515	0.000702	0.0295172	-0.56592	3.15362	-3.15362		ACER1	-0.0018834	-0.068793	0.0650262	5.85794	-0.0555622	0.955755	0.981159	-5.99145	0.0196533	-0.0196533
ZDHHC22	-0.601702	-0.863435	-0.339969	8.366	-4.53783	1.07e-05	0.00603707	3.15655	4.97235	-4.97235		ACER3	-0.146024	-0.292643	0.000595215	9.69227	-1.96589	0.0509269	0.238133	-4.1895	1.29305	-1.29305
GPR27	-0.602923	-0.937648	-0.268198	8.65304	-3.55549	0.000488	0.0250606	-0.246254	3.31176	-3.31176		ACHE	0.0836634	-0.113946	0.281273	7.31191	0.835705	0.404484	0.663031	-5.66383	0.393099	0.393099
ATP6V1G2	-0.604568	-0.975445	-0.233691	9.0201	-3.21766	0.00154549	0.0423261	-1.25468	2.81093	-2.81093		ACIN1	0.0606422	-0.0501151	0.1714	8.57338	1.08076	0.281323	0.554751	-5.44335	0.550794	0.550794
CRTAC1	-0.609757	-0.878024	-0.34149	7.3992	-4.48657	1.32e-05	0.00647089	2.96271	4.87855	-4.87855		ACKR1	-0.0140534	-0.241841	0.213734	7.61286	-0.12178	0.903216	0.957607	-5.98591	0.0442085	-0.0442085
FXYD7	-0.62131	-1.01092	-0.231695	7.58287	-3.14773	0.001941	0.047158	-1.45242	2.71197	-2.71197		ACKR2	-0.0519267	-0.116864	0.0130105	7.07097	-1.57842	0.116313	0.353576	-4.82545	0.934373	-0.934373
GNAL	-0.623521	-0.988275	-0.258766	7.49743	-3.37424	0.000915	0.0329506	-0.798139	3.0384	-3.0384		ACKR3	0.314178	0.0346105	0.593745	9.46889	2.21827	0.0278502	0.174323	-3.70407	1.55517	1.55517
PCDH7	-0.624623	-0.989268	-0.259978	8.61003	-3.38121	0.000894	0.0325024	-0.777351	3.04873	-3.04873		ACKR4	-0.00468666	-0.0920099	0.0826365	4.6897	-0.10594	0.915754	0.964173	-5.98761	0.0382212	-0.0382212
SEZ6L	-0.63372	-0.953858	-0.313582	8.55133	-3.90738	0.000134	0.0147284	0.894779	3.87255	-3.87255		ACLY	0.172226	0.0221928	0.32226	11.1675	2.26588	0.0247098	0.164472	-3.60631	1.60713	1.60713
PPM1L	-0.638591	-0.936449	-0.340732	8.21752	-4.23192	3.77e-05	0.00977248	2.02539	4.42388	-4.42388		ACMSD	-0.038676	-0.091935	0.0145829	5.09905	-1.43342	0.153558	0.40668	-5.0288	0.813726	-0.813726
SLITRK1	-0.639076	-0.963091	-0.315062	7.35791	-3.89326	0.000141	0.0150023	0.847284	3.84931	-3.84931		ACO1	-0.0919358	-0.222348	0.0384766	9.08943	-1.39153	0.165869	0.421728	-5.08401	0.780234	-0.780234
GALNT13	-0.643629	-0.974578	-0.31268	7.85376	-3.83884	0.000174	0.0162999	0.66549	3.76026	-3.76026		ACO2	-0.188658	-0.361067	-0.016249	10.4448	-2.15993	0.0321669	0.189602	-3.82119	1.49259	-1.49259
SYT16	-0.646488	-1.04883	-0.244144	7.58733	-3.17168	0.00179609	0.0457724	-1.38515	2.74567	-2.74567		ACOD1	-0.0596954	-0.121079	0.00168768	5.79641	-1.91963	0.0565656	0.251265	-4.27243	1.24745	-1.24745
ZNF727	-0.648934	-1.00481	-0.293061	6.03243	-3.5994	0.000417	0.0240336	-0.108831	3.37959	-3.37959		ACOT1	0.0283497	-0.146797	0.203497	8.0878	0.3195	0.749737	0.888301	-5.94472	0.125091	0.125091
NRG3	-0.659048	-0.98474	-0.333355	6.73925	-3.99424	9.62e-05	0.0126226	1.1902	4.01697	-4.01697		ACOT11	0.0438772	-0.0345338	0.122288	7.60732	1.10455	0.270901	0.545409	-5.41897	0.56719	0.56719
VAT1L	-0.662213	-1.04338	-0.281043	8.22151	-3.42929	0.000758	0.0305999	-0.633146	3.12029	-3.12029		ACOT12	0.0597955	0.000947201	0.118644	4.09096	2.00567	0.0464643	0.227316	-4.11667	1.33288	1.33288
XKR4	-0.664506	-1.0699	-0.259111	7.73962	-3.23553	0.00145719	0.0409497	-1.20353	2.83648	-2.83648		ACOT13	0.0593095	-0.0811085	0.199727	8.81692	0.833732	0.405592	0.663736	-5.66538	0.39191	0.39191
PHYHIPL	-0.673124	-1.01062	-0.335624	10.4655	-3.93683	0.00012	0.0141013	0.994336	3.92125	-3.92125		ACOT2	0.0283497	-0.146797	0.203497	8.0878	0.3195	0.749737	0.888301	-5.94472	0.125091	0.125091
GRM5	-0.679142	-1.07394	-0.284346	7.44756	-3.39557	0.000851	0.031774	-0.734466	3.07002	-3.07002		ACOT4	-0.0266109	-0.150554	0.0973322	5.90299	-0.423801	0.672242	0.845201	-5.90815	0.172474	-0.172474
NALCN	-0.687625	-1.10508	-0.270171	8.31641	-3.25138	0.00138281	0.0395402	-1.15795	2.85924	-2.85924		ACOT6	-0.0310523	-0.0791089	0.0170042	4.69099	-1.27546	0.203872	0.46818	-5.22858	0.690641	-0.690641
GPR158	-0.693515	-0.984026	-0.403005	9.1879	-4.71215	5.05e-06	0.00428148	3.82833	5.29694	-5.29694		ACOT7	-0.106225	-0.324856	0.112406	9.17873	-0.95905	0.338885	0.606682	-5.55982	0.469948	-0.469948
NMNAT2	-0.697379	-1.05208	-0.342681	8.38675	-3.88093	0.000148	0.0154148	0.805911	3.82905	-3.82905		ACOT8	0.0051911	-0.0734581	0.0838403	8.11329	0.130284	0.896495	0.954925	-5.98489	0.0474523	0.0474523
KCNQ5	-0.703926	-1.12987	-0.277979	6.37741	-3.2621	0.00133457	0.0390324	-1.12704	2.87466	-2.87466		ACOT9	0.210851	0.0511164	0.370586	8.99897	2.60556	0.00997902	0.10229	-2.85279	2.00091	2.00091
ARHGAP36	-0.70572	-1.08778	-0.323656	5.82018	-3.64604	0.000353	0.0221876	0.0387134	3.45232	-3.45232		ACOX1	-0.0107498	-0.124944	0.103444	9.81378	-0.185815	0.85281	0.936563	-5.97661	0.0691479	-0.0691479
PCSK2	-0.719684	-1.11518	-0.324188	6.95849	-3.59191	0.000429	0.0242779	-0.132384	3.36797	-3.36797		ACOX2	0.461936	0.228168	0.695703	7.74342	3.90052	0.00013764	0.0149639	0.871691	3.86125	3.86125
BRINP1	-0.735827	-1.11506	-0.356598	8.57457	-3.83001	0.00018	0.016656	0.636194	3.7459	-3.7459		ACOX3	0.0407753	-0.0432293	0.12478	8.30714	0.958119	0.339352	0.606727	-5.56066	0.469349	0.469349
NRXN1	-0.744467	-1.17925	-0.309679	9.07043	-3.37982	0.000898	0.0325477	-0.781517	3.04666	-3.04666		ACOXL	-0.00342573	-0.0374164	0.0305649	4.12072	-0.198938	0.842547	0.932189	-5.97422	0.0744059	-0.0744059
PABPC5	-0.745896	-1.03323	-0.458564	4.46536	-5.12412	7.99e-07	0.00162742	5.49051	6.0973	-6.0973		ACP1	0.0524104	-0.0547951	0.159616	10.3845	0.964996	0.335906	0.604232	-5.55445	0.473782	0.473782
CSMD3	-0.74711	-1.07757	-0.416652	5.81997	-4.46266	1.46e-05	0.00699362	2.87287	4.83505	-4.83505		ACP2	0.103563	-0.00120164	0.208328	9.56636	1.95126	0.0526562	0.242069	-4.21593	1.27855	1.27855
SCG3	-0.769927	-1.19272	-0.347132	8.55472	-3.59455	0.000425	0.0242149	-0.124071	3.37207	-3.37207		ACP4	0.0429001	-0.0193113	0.105112	7.49742	1.36117	0.175246	0.433204	-5.123	0.756353	0.756353
PHACTR3	-0.805671	-1.30782	-0.303524	8.12596	-3.16703	0.00182339	0.0459638	-1.39823	2.73912	-2.73912		ACP5	0.0339423	-0.193715	0.2616	7.09913	0.294296	0.768888	0.899071	-5.95202	0.114137	0.114137
AKR1C3	-0.82137	-1.24103	-0.401713	7.24306	-3.86341	0.000158	0.0158915	0.747291	3.80035	-3.80035		ACP6	0.216934	0.0382072	0.395661	8.76004	2.39587	0.017658	0.13748	-3.3295	1.75306	1.75306
CPLX1	-0.82792	-1.34373	-0.312114	7.52917	-3.16831	0.00181584	0.0459638	-1.39463	2.74092	-2.74092		ACPP	0.0411303	-0.035544	0.117805	6.59996	1.05886	0.291155	0.564013	-5.46532	0.535876	0.535876
INA	-0.847936	-1.33778	-0.358095	8.52454	-3.41691	0.000791	0.0308648	-0.670458	3.10179	-3.10179		ACR	-0.0472459	-0.110531	0.0160393	6.17955	-1.47363	0.142417	0.391128	-4.97433	0.846439	-0.846439
TNR	-0.869998	-1.35411	-0.385883	10.032	-3.54727	0.000502	0.0254474	-0.271798	3.29914	-3.29914		ACRBP	0.018195	-0.0568186	0.0932086	6.46691	0.478782	0.632704	0.823682	-5.88474	0.198799	0.198799
CNTN1	-0.872537	-1.28248	-0.462594	9.06992	-4.20132	4.26e-05	0.0105417	1.91567	4.37053	-4.37053		ACRV1	-0.12003	-0.198186	-0.0418737	6.88098	-3.03146	0.00281156	0.0565095	-1.7727	2.55105	-2.55105
KCNB1	-0.886045	-1.22832	-0.54377	8.19107	-5.10981	8.54e-07	0.00162742	5.43109	6.06875	-6.06875		ACSBG1	-0.391761	-0.736094	-0.0474288	8.60395	-2.24579	0.0259951	0.16814	-3.64781	1.58511	-1.58511
CNTN3	-0.909249	-1.47709	-0.341404	6.00664	-3.16066	0.00186146	0.046322	-1.41615	2.73015	-2.73015		ACSBG2	-0.0247718	-0.107173	0.0576292	6.94247	-0.593404	0.553693	0.771494	-5.82682	0.256731	-0.256731
KLRC3	-0.917857	-1.3659	-0.469819	5.89302	-4.04376	7.94e-05	0.0119481	1.36097	4.10033	-4.10033		ACSF2	0.0983079	-0.0209998	0.217616	7.87822	1.62647	0.105687	0.336451	-4.75388	0.975977	0.975977
SNAP91	-0.93439	-1.48346	-0.385316	8.25365	-3.3591	0.000964	0.0334957	-0.843105	3.01605	-3.01605		ACSF3	0.0193209	-0.0473458	0.0859875	7.38949	0.572062	0.568029	0.780804	-5.83854	0.245629	0.245629
SUSD5	-0.946498	-1.39804	-0.494954	5.56112	-4.13756	5.49e-05	0.0110105	1.68917	4.2603	-4.2603		ACSL1	0.0704504	-0.199807	0.340708	9.31455	0.514554	0.607527	0.806331	-5.86799	0.216434	0.216434
LINC00844	-0.959026	-1.50784	-0.410209	8.99192	-3.44927	0.000708	0.0296298	-0.572674	3.15027	-3.15027		ACSL3	0.0425499	-0.136196	0.221296	10.3962	0.46988	0.639038	0.826526	-5.88872	0.194473	0.194473
GABRB3	-0.963522	-1.42899	-0.498056	8.07531	-4.08601	6.73e-05	0.0110573	1.50802	4.17204	-4.17204		ACSL4	-0.101497	-0.28975	0.0867553	7.78295	-1.06424	0.288718	0.561523	-5.45996	0.539527	-0.539527
DPP10	-1.02781	-1.50067	-0.554947	6.38315	-4.29046	2.97e-05	0.00873153	2.23705	4.52672	-4.52672		ACSL5	0.0107251	-0.11284	0.13429	7.50265	0.17133	0.864167	0.941699	-5.97905	0.0634024	0.0634024
FUT9	-1.0709	-1.6064	-0.535404	8.52546	-3.94745	0.000115	0.0139205	1.0304	3.93889	-3.93889		ACSL6	-0.582217	-0.994256	-0.170177	8.07512	-2.78914	0.00588271	0.0797928	-2.40537	2.23042	-2.23042
KLRC1	-1.2187	-1.87994	-0.557454	6.41449	-3.63798	0.000363	0.0221876	0.0130796	3.43969	-3.43969		ACSM1	0.0129358	-0.0429653	0.0688369	4.88549	0.45677	0.648415	0.831957	-5.89445	0.188147	0.188147
KLRC2	-1.2187	-1.87994	-0.557454	6.41449	-3.63798	0.000363	0.0221876	0.0130796	3.43969	-3.43969		ACSM2A	-0.00644609	-0.0715113	0.0586191	5.85362	-0.195557	0.845189	0.933507	-5.97485	0.0730463	-0.0730463
												ACSM2B	-0.00644609	-0.0715113	0.0586191	5.85362	-0.195557	0.845189	0.933507	-5.97485	0.0730463	-0.0730463
												ACSM3	-0.0850515	-0.140927	-0.029176	5.28228	-3.0046	0.00305827	0.0584656	-1.84516	2.51452	-2.51452
												ACSM5	-0.093237	-0.253476	0.0670015	7.72944	-1.14854	0.252346	0.525948	-5.37254	0.598004	-0.598004
												ACSS1	-0.150357	-0.299695	-0.00101959	8.88821	-1.98738	0.0484734	0.232357	-4.15033	1.3145	-1.3145
												ACSS2	0.00100422	-0.0930187	0.0950271	9.20975	0.0210824	0.983204	0.993165	-5.9927	0.00735617	0.00735617
												ACSS3	0.552702	0.279942	0.825463	8.24693	3.99977	9.41373e-05	0.0125086	1.20918	4.02624	4.02624
												ACTA1	0.000524925	-0.0811753	0.0822252	5.55811	0.0126823	0.989896	0.996022	-5.99283	0.00441044	0.00441044
												ACTA2	0.304729	-0.0157998	0.625258	10.7149	1.8766	0.0622723	0.262122	-4.34788	1.20571	1.20571
												ACTA2-AS1	0.00577225	-0.0516892	0.0632337	5.72427	0.198287	0.843056	0.932464	-5.97435	0.0741438	0.0741438
												ACTB	0.0794155	0.0356359	0.123195	14.3201	3.58063	0.000446155	0.0243367	-0.167754	3.35052	3.35052
												ACTBP9	0.262293	0.120376	0.40421	9.79257	3.64818	0.000350212	0.0221075	0.0455221	3.45567	3.45567
												ACTC1	-0.105488	-0.23097	0.0199942	8.35263	-1.65938	0.0988676	0.325988	-4.70365	1.00495	-1.00495
												ACTG1	0.0584544	-0.00393371	0.120843	13.8255	1.84944	0.0661161	0.26972	-4.39466	1.17969	1.17969
												ACTG1P17	0.0643742	-0.00656888	0.135317	6.11163	1.79113	0.0750369	0.286543	-4.49288	1.12472	1.12472
												ACTG2	0.225089	-0.0173076	0.467486	7.35289	1.83296	0.0685433	0.274148	-4.42273	1.16403	1.16403
												ACTL10	0.0651302	-0.00520177	0.135462	6.32812	1.82791	0.0693016	0.275582	-4.43128	1.15926	1.15926
												ACTL6A	0.218261	-0.0296462	0.466167	8.77953	1.73785	0.0840333	0.302999	-4.57999	1.07555	1.07555
												ACTL6B	-0.326096	-0.608061	-0.0441309	6.98995	-2.28284	0.0236681	0.160996	-3.57102	1.62584	-1.62584
												ACTL7A	0.0231983	-0.045747	0.0921437	6.56962	0.664167	0.507476	0.738452	-5.7849	0.294585	0.294585
												ACTL7B	0.0199621	-0.0359751	0.0758992	6.29728	0.704417	0.482129	0.720734	-5.75896	0.316837	0.316837
												ACTL8	-0.0205595	-0.0799164	0.0387974	7.52021	-0.683701	0.495087	0.7287	-5.7725	0.305319	-0.305319
												ACTL9	0.0110354	-0.0586586	0.0807294	5.16568	0.312549	0.755003	0.890337	-5.94679	0.122051	0.122051
												ACTN1	0.187101	0.0124801	0.361721	11.936	2.11498	0.0358775	0.199868	-3.90945	1.44518	1.44518
												ACTN2	-0.108358	-0.294837	0.0781207	8.95639	-1.14698	0.252987	0.526622	-5.37421	0.596902	-0.596902
												ACTN3	0.0190499	-0.0348267	0.0729266	6.393	0.697941	0.48616	0.723434	-5.76324	0.313221	0.313221
												ACTN4	0.244306	0.0754215	0.41319	10.5318	2.85542	0.00482918	0.0740406	-2.23705	2.31613	2.31613
												ACTR10	-0.0509389	-0.175137	0.0732591	10.586	-0.809581	0.419304	0.674634	-5.68405	0.377471	-0.377471
												ACTR1A	-0.1659	-0.287079	-0.0447205	9.81746	-2.70236	0.00757755	0.0901184	-2.62036	2.12047	-2.12047
												ACTR1B	0.0662079	-0.0275239	0.15994	9.4985	1.39427	0.16504	0.42078	-5.08044	0.782412	0.782412
												ACTR2	0.14297	0.0377152	0.248224	11.1868	2.68119	0.00805277	0.0927357	-2.67184	2.09405	2.09405
												ACTR3	0.131466	0.00837409	0.254558	12.1454	2.10819	0.0364686	0.201185	-3.92262	1.43808	1.43808
												ACTR3B	0.0852855	-0.0687874	0.239358	8.81777	1.09263	0.276088	0.550132	-5.43125	0.558952	0.558952
												ACTR3BP1	-0.0136311	-0.0728577	0.0455956	6.09568	-0.454295	0.650191	0.832987	-5.89552	0.186959	-0.186959
												ACTR3BP2	0.0296806	-0.0292499	0.088611	7.04593	0.994163	0.321545	0.591386	-5.52763	0.492758	0.492758
												ACTR3BP3	0.0296806	-0.0292499	0.088611	7.04593	0.994163	0.321545	0.591386	-5.52763	0.492758	0.492758
												ACTR3BP5	0.0296806	-0.0292499	0.088611	7.04593	0.994163	0.321545	0.591386	-5.52763	0.492758	0.492758
												ACTR3BP6	0.0296806	-0.0292499	0.088611	7.04593	0.994163	0.321545	0.591386	-5.52763	0.492758	0.492758
												ACTR3C	0.00734976	-0.0682013	0.0829008	5.50547	0.192025	0.84795	0.93447	-5.9755	0.0716298	0.0716298
												ACTR3P2	-0.0140445	-0.0515547	0.0234657	4.41563	-0.739066	0.460878	0.707481	-5.73542	0.336414	-0.336414
												ACTR5	0.0141303	-0.0618656	0.0901263	8.21949	0.367018	0.714058	0.86671	-5.92933	0.146266	0.146266
												ACTR6	-0.0421251	-0.18308	0.0988303	8.605	-0.589908	0.556029	0.773196	-5.82876	0.254902	-0.254902
												ACTR8	0.0738245	0.0145649	0.133084	8.64201	2.45905	0.0149238	0.125734	-3.18977	1.82612	1.82612
												ACTRT2	0.0280148	-0.0436282	0.0996577	6.32182	0.77186	0.44126	0.691912	-5.7121	0.355305	0.355305
												ACTRT3	-0.0532956	-0.12876	0.0221683	5.39401	-1.39405	0.165108	0.420902	-5.08073	0.782232	-0.782232
												ACVR1	-0.0295485	-0.204657	0.14556	9.2392	-0.333084	0.739478	0.882569	-5.94054	0.131075	-0.131075
												ACVR1B	-0.111001	-0.222679	0.000677778	9.80447	-1.96192	0.051391	0.23922	-4.19669	1.28911	-1.28911
												ACVR1C	-0.437525	-0.698	-0.177049	7.03007	-3.31559	0.00111621	0.036022	-0.971346	2.95226	-2.95226
												ACVR2A	-0.0448783	-0.150621	0.0608641	8.51228	-0.837746	0.40334	0.661896	-5.66223	0.394329	-0.394329
												ACVR2B	-0.132274	-0.273321	0.00877398	7.99399	-1.85111	0.065874	0.269327	-4.3918	1.18129	-1.18129
												ACVR2B-AS1	-0.0132727	-0.0792011	0.0526558	6.60084	-0.397384	0.691579	0.854456	-5.91838	0.160158	-0.160158
												ACVRL1	0.020603	-0.154203	0.195409	7.77683	0.232648	0.816312	0.921106	-5.96735	0.0881438	0.0881438
												ACY1	0.086738	-0.0257397	0.199216	8.30468	1.52219	0.129805	0.373458	-4.90657	0.88671	0.88671
												ACY3	0.0212098	-0.068903	0.111323	6.41096	0.464595	0.642811	0.828359	-5.89105	0.191917	0.191917
												ACYP1	0.120379	-0.057451	0.29821	8.0582	1.3362	0.183255	0.44402	-5.15446	0.736944	0.736944
												ACYP2	-0.0557971	-0.229061	0.117467	8.67919	-0.635666	0.525842	0.751381	-5.80234	0.279145	-0.279145
												ADA	-0.0169119	-0.156816	0.122992	7.81684	-0.23861	0.811693	0.918771	-5.96603	0.090608	-0.090608
												ADA2	0.374873	0.157722	0.592025	9.42543	3.40759	0.000816785	0.0313966	-0.698463	3.08789	3.08789
												ADAD1	-0.0363574	-0.111612	0.0388975	6.61925	-0.953638	0.34161	0.60927	-5.56468	0.46647	-0.46647
												ADAD2	-0.0495908	-0.126862	0.0276803	6.89115	-1.2668	0.206944	0.471985	-5.23887	0.684147	-0.684147
												ADAL	-0.131273	-0.222187	-0.0403583	7.50396	-2.85014	0.00490624	0.0745717	-2.25057	2.30925	-2.30925
												ADAM10	0.0928715	-0.0361084	0.221851	10.7366	1.4213	0.157047	0.411192	-5.04494	0.803972	0.803972
												ADAM11	-0.0820926	-0.196255	0.0320697	7.3779	-1.41941	0.157597	0.411809	-5.04745	0.802453	-0.802453
												ADAM12	0.483164	0.155632	0.810696	7.8886	2.91183	0.00407134	0.0669197	-2.09096	2.39026	2.39026
												ADAM15	0.0398298	-0.0440351	0.123695	8.78775	0.937461	0.349841	0.616409	-5.57905	0.45613	0.45613
												ADAM17	0.111867	-0.00468849	0.228423	9.47583	1.8945	0.0598426	0.257442	-4.31669	1.22299	1.22299
												ADAM18	0.00274174	-0.047246	0.0527295	5.81383	0.108265	0.913912	0.963082	-5.98737	0.0390955	0.0390955
												ADAM19	0.15983	-0.0663734	0.386034	7.69193	1.39471	0.164907	0.420662	-5.07986	0.78276	0.78276
												ADAM1A	-0.0259101	-0.220703	0.168883	6.54236	-0.262555	0.793209	0.909939	-5.96036	0.100612	-0.100612
												ADAM2	-0.0223012	-0.0575013	0.0128988	4.20623	-1.25058	0.212792	0.478689	-5.25797	0.672044	-0.672044
												ADAM20	-0.0246869	-0.0814057	0.0320319	5.8996	-0.859141	0.391463	0.652519	-5.64516	0.407309	-0.407309
												ADAM21	-0.0647754	-0.152975	0.0234245	5.84729	-1.44966	0.148979	0.400816	-5.00697	0.826874	-0.826874
												ADAM22	-0.455186	-0.724552	-0.18582	9.07607	-3.33558	0.00104354	0.0348717	-0.912606	2.98149	-2.98149
												ADAM23	-0.0678886	-0.210069	0.0742918	8.43542	-0.942503	0.347262	0.61427	-5.5746	0.459343	-0.459343
												ADAM28	0.0427613	-0.203624	0.289147	8.08456	0.34258	0.732334	0.877497	-5.93751	0.135291	0.135291
												ADAM29	-0.0560133	-0.118592	0.00656521	5.96939	-1.76682	0.0790389	0.2932	-4.53295	1.10216	-1.10216
												ADAM30	-0.0350196	-0.0997507	0.0297114	6.44284	-1.06788	0.287074	0.560301	-5.45632	0.542006	-0.542006
												ADAM32	0.000724629	-0.0803905	0.0818398	6.2855	0.0176335	0.985952	0.994338	-5.99276	0.00614434	0.00614434
												ADAM33	0.0999096	-0.0280286	0.227848	9.40692	1.54146	0.125049	0.365991	-4.87909	0.90292	0.90292
												ADAM3A	0.0192151	-0.0229808	0.061411	4.6523	0.898872	0.369982	0.633648	-5.61234	0.43182	0.43182
												ADAM5	-0.101523	-0.181777	-0.02127	6.00887	-2.49705	0.0134665	0.11895	-3.10409	1.87074	-1.87074
												ADAM6	-0.0142799	-0.0682493	0.0396895	6.90774	-0.522279	0.60215	0.803081	-5.86421	0.220295	-0.220295
												ADAM7	-0.00133861	-0.0694848	0.0668075	5.78559	-0.0387737	0.969116	0.987266	-5.9922	0.0136243	-0.0136243
												ADAM8	0.113983	-0.0388674	0.266833	7.12668	1.47197	0.142863	0.391704	-4.9766	0.84508	0.84508
												ADAM9	0.296523	0.0203877	0.572657	10.1589	2.11964	0.0354763	0.198715	-3.90038	1.45006	1.45006
												ADAMDEC1	-0.0540232	-0.333808	0.225762	5.42646	-0.381137	0.703573	0.861084	-5.92435	0.152691	-0.152691
												ADAMTS1	0.0938161	-0.212882	0.400514	8.76102	0.603798	0.546776	0.767319	-5.82095	0.262191	0.262191
												ADAMTS10	-0.0665339	-0.192688	0.0596198	8.0011	-1.04104	0.299322	0.571056	-5.48286	0.523861	-0.523861
												ADAMTS12	0.0260882	-0.165054	0.21723	7.73926	0.26941	0.787938	0.907463	-5.95864	0.103508	0.103508
												ADAMTS13	0.0154388	-0.0472211	0.0780986	7.66567	0.48635	0.62734	0.820022	-5.8813	0.202497	0.202497
												ADAMTS14	0.118491	-0.0184674	0.255449	7.41643	1.70774	0.0894951	0.311663	-4.62809	1.0482	1.0482
												ADAMTS15	0.150437	-0.151668	0.452542	8.06706	0.982931	0.327027	0.595995	-5.53805	0.485416	0.485416
												ADAMTS16	-0.0546834	-0.130696	0.0213295	6.45401	-1.42002	0.157419	0.411588	-5.04664	0.802942	-0.802942
												ADAMTS17	-0.0649874	-0.186364	0.0563887	6.22696	-1.05687	0.292058	0.564518	-5.46729	0.53453	-0.53453
												ADAMTS18	0.0545089	-0.104048	0.213065	7.55699	0.678591	0.498312	0.731397	-5.77578	0.302499	0.302499
												ADAMTS19	-0.137786	-0.261153	-0.0144185	5.51276	-2.2046	0.0288138	0.17746	-3.73178	1.5404	-1.5404
												ADAMTS2	0.102642	-0.138777	0.344061	7.58731	0.839225	0.402512	0.661351	-5.66106	0.395221	0.395221
												ADAMTS20	-0.133103	-0.213972	-0.052235	4.71713	-3.24889	0.00139426	0.0396995	-1.16513	2.85566	-2.85566
												ADAMTS3	-0.0857452	-0.493272	0.321781	5.98653	-0.415316	0.67843	0.848466	-5.9115	0.168495	-0.168495
												ADAMTS4	-0.046851	-0.108328	0.0146265	7.08329	-1.50428	0.134351	0.37998	-4.93181	0.871761	-0.871761
												ADAMTS5	-0.173717	-0.455053	0.10762	7.64824	-1.21882	0.224586	0.493381	-5.29465	0.648617	-0.648617
												ADAMTS6	-0.0681178	-0.252014	0.115778	6.82654	-0.731163	0.465678	0.709189	-5.74089	0.331914	-0.331914
												ADAMTS7	-0.0143866	-0.0827319	0.0539587	6.90309	-0.415503	0.678294	0.848466	-5.91143	0.168582	-0.168582
												ADAMTS7P1	-0.0361781	-0.132108	0.0597524	6.67911	-0.744413	0.457646	0.705354	-5.73169	0.339471	-0.339471
												ADAMTS7P3	0.0911045	-0.00445584	0.186665	6.25429	1.88186	0.06155	0.260837	-4.33874	1.21077	1.21077
												ADAMTS7P4	-0.0361781	-0.132108	0.0597524	6.67911	-0.744413	0.457646	0.705354	-5.73169	0.339471	-0.339471
												ADAMTS8	-0.222059	-0.40811	-0.0360077	7.07257	-2.35592	0.0196072	0.14489	-3.4161	1.70758	-1.70758
												ADAMTS9	0.108208	-0.182092	0.398507	8.64671	0.73576	0.462882	0.70821	-5.73771	0.33453	0.33453
												ADAMTS9-AS1	-0.0637357	-0.127035	-0.000436105	4.26749	-1.9875	0.0484597	0.232357	-4.15011	1.31462	-1.31462
												ADAMTS9-AS2	0.394325	0.172616	0.616034	7.85897	3.51072	0.000571154	0.0268442	-0.384872	3.24325	3.24325
												ADAMTSL1	0.0748324	-0.0300287	0.179694	6.61733	1.40864	0.160753	0.41568	-5.06165	0.793842	0.793842
												ADAMTSL2	-0.0535506	-0.167874	0.0607726	6.17742	-0.924603	0.356473	0.62163	-5.59029	0.447974	-0.447974
												ADAMTSL3	0.0277517	-0.0705395	0.126043	6.9935	0.557315	0.578039	0.787225	-5.84638	0.238042	0.238042
												ADAMTSL4	0.244149	0.0877247	0.400573	6.92107	3.08089	0.00240485	0.0523546	-1.63784	2.61891	2.61891
												ADAMTSL5	-0.0396309	-0.106328	0.0270662	7.08375	-1.17288	0.242473	0.514741	-5.34608	0.615336	-0.615336
												ADAP1	-0.199204	-0.401976	0.00356775	9.44787	-1.93917	0.0541227	0.245635	-4.23763	1.26662	-1.26662
												ADAP2	0.0878578	-0.0999598	0.275676	8.98681	0.923356	0.35712	0.622169	-5.59138	0.447186	0.447186
												ADAR	0.0414351	-0.0509881	0.133858	11.3196	0.884938	0.37743	0.640536	-5.62402	0.423164	0.423164
												ADARB1	-0.0420966	-0.219011	0.134817	8.15583	-0.469689	0.639174	0.826531	-5.88881	0.194381	-0.194381
												ADARB2	-0.12591	-0.293907	0.0420861	6.29407	-1.4794	0.140868	0.389312	-4.96638	0.851187	-0.851187
												ADARB2-AS1	-0.0373309	-0.0959398	0.0212779	7.84267	-1.25728	0.210364	0.475816	-5.25011	0.677029	-0.677029
												ADAT1	0.0789311	-0.0711283	0.228991	8.23403	1.03827	0.300607	0.572632	-5.48557	0.522001	0.522001
												ADAT2	-0.0596844	-0.172245	0.0528763	6.77615	-1.04665	0.296737	0.568693	-5.47738	0.527628	-0.527628
												ADAT3	0.0214823	-0.0396293	0.082594	9.10702	0.693877	0.488698	0.725141	-5.7659	0.310959	0.310959
												ADCK1	-0.121024	-0.198531	-0.0435159	8.4267	-3.08213	0.00239544	0.0523546	-1.63445	2.62062	-2.62062
												ADCK2	0.173732	0.056722	0.290742	9.15695	2.93077	0.00384237	0.0650894	-2.04133	2.4154	2.4154
												ADCK5	0.00874362	-0.0766854	0.0941727	6.48314	0.202028	0.840135	0.931195	-5.97364	0.0756512	0.0756512
												ADCY1	-0.291301	-0.634109	0.0515065	8.70979	-1.67732	0.0953017	0.320716	-4.67586	1.0209	-1.0209
												ADCY10	0.0128982	-0.0341566	0.0599531	5.37647	0.541067	0.589164	0.794643	-5.8548	0.229764	0.229764
												ADCY10P1	-0.0449396	-0.190027	0.100148	6.9478	-0.611398	0.541746	0.763445	-5.8166	0.266204	-0.266204
												ADCY2	-0.476971	-0.782909	-0.171032	10.1096	-3.07739	0.00243175	0.0525034	-1.64745	2.61408	-2.61408
												ADCY3	0.0614622	-0.0470908	0.170015	8.00446	1.11761	0.265296	0.540097	-5.40537	0.576269	0.576269
												ADCY4	-0.0393936	-0.120749	0.0419623	8.48163	-0.955789	0.340525	0.608043	-5.56275	0.467851	-0.467851
												ADCY5	-0.255684	-0.422268	-0.0891	7.28024	-3.02967	0.00282736	0.0566997	-1.77753	2.54862	-2.54862
												ADCY6	0.132903	0.0453388	0.220467	8.9971	2.99594	0.00314186	0.0594303	-1.86838	2.50281	2.50281
												ADCY7	-0.000354329	-0.087713	0.0870043	7.85736	-0.0080062	0.993621	0.997235	-5.99288	0.00277908	-0.00277908
												ADCY8	-0.0417902	-0.333245	0.249665	7.37803	-0.283027	0.777498	0.902594	-5.95509	0.109301	-0.109301
												ADCY9	0.00171365	-0.134176	0.137603	8.52148	0.0248921	0.98017	0.991827	-5.99262	0.0086986	0.0086986
												ADCYAP1	-0.0888463	-0.248559	0.070866	6.24838	-1.09806	0.273718	0.548128	-5.42568	0.562696	-0.562696
												ADCYAP1R1	-0.288106	-0.639386	0.0631739	10.6367	-1.61892	0.107304	0.338968	-4.76527	0.969384	-0.969384
												ADD1	-0.0779396	-0.178891	0.0230123	10.7631	-1.52394	0.129366	0.372738	-4.90408	0.888181	-0.888181
												ADD2	-0.289781	-0.53092	-0.048643	9.43829	-2.37208	0.018797	0.141924	-3.38124	1.72591	-1.72591
												ADD3	-0.324801	-0.547587	-0.102016	11.3861	-2.87777	0.0045147	0.0710372	-2.17947	2.34537	-2.34537
												ADD3-AS1	-0.07777	-0.179291	0.0237509	5.95169	-1.5121	0.132349	0.376894	-4.92082	0.87828	-0.87828
												ADGB	0.0846509	-0.0296218	0.198924	4.22708	1.46223	0.14551	0.395418	-4.98992	0.837106	0.837106
												ADGRA1	-0.336301	-0.549561	-0.123041	7.1724	-3.11275	0.00217233	0.0495355	-1.54992	2.66308	-2.66308
												ADGRA2	0.0617819	-0.114008	0.237572	8.32737	0.693732	0.488789	0.725141	-5.76599	0.310878	0.310878
												ADGRA3	-0.0607858	-0.22295	0.101378	9.29711	-0.7399	0.460373	0.707405	-5.73484	0.33689	-0.33689
												ADGRB1	-0.0871473	-0.234034	0.0597398	7.04029	-1.1711	0.243183	0.515663	-5.34803	0.614068	-0.614068
												ADGRB2	-0.0265616	-0.219785	0.166662	9.45697	-0.271344	0.786453	0.906835	-5.95815	0.104327	-0.104327
												ADGRB3	-0.479995	-0.819691	-0.140299	8.69497	-2.78915	0.0058826	0.0797928	-2.40535	2.23043	-2.23043
												ADGRD1	-0.0147187	-0.178712	0.149275	5.19538	-0.177161	0.859591	0.939913	-5.97809	0.0657079	-0.0657079
												ADGRD2	-0.0446126	-0.145559	0.0563336	7.41801	-0.872353	0.384236	0.647048	-5.63441	0.415402	-0.415402
												ADGRE1	0.00578526	-0.122209	0.133779	6.83563	0.0892192	0.929012	0.969549	-5.98915	0.0319787	0.0319787
												ADGRE2	0.222848	0.0306164	0.41508	6.55158	2.28828	0.0233423	0.159953	-3.55964	1.63186	1.63186
												ADGRE3	-0.0209887	-0.0790743	0.0370969	5.7946	-0.713252	0.47666	0.717624	-5.75307	0.321791	-0.321791
												ADGRE5	0.513869	0.256355	0.771383	8.04089	3.93892	0.000118926	0.0141013	1.00143	3.92472	3.92472
												ADGRF1	0.00507325	-0.0522529	0.0623994	5.59831	0.174686	0.861532	0.940433	-5.9785	0.0647285	0.0647285
												ADGRF2	0.00109008	-0.0432322	0.0454123	4.60258	0.0485471	0.961337	0.983383	-5.9918	0.0171245	0.0171245
												ADGRF3	-0.053574	-0.11603	0.008882	6.43877	-1.69319	0.0922363	0.315752	-4.65105	1.0351	-1.0351
												ADGRF4	-0.0255888	-0.0875884	0.0364108	5.89203	-0.814679	0.416386	0.672202	-5.68015	0.380503	-0.380503
												ADGRF5	-0.0287482	-0.226785	0.169289	8.71676	-0.286543	0.774808	0.901298	-5.95415	0.110806	-0.110806
												ADGRG1	-0.136073	-0.329875	0.0577284	11.8239	-1.38593	0.167569	0.423219	-5.09126	0.775806	-0.775806
												ADGRG2	0.00563881	-0.128908	0.140185	5.85205	0.0827258	0.934166	0.972147	-5.98968	0.0295759	0.0295759
												ADGRG3	0.00604084	-0.0685705	0.0806522	6.43327	0.159815	0.873215	0.944925	-5.98085	0.0588788	0.0588788
												ADGRG4	-0.0105465	-0.0610192	0.0399262	5.25784	-0.412455	0.680521	0.849079	-5.91262	0.167158	-0.167158
												ADGRG5	0.0404519	-0.016955	0.0978587	5.5078	1.39091	0.166055	0.421968	-5.0848	0.779749	0.779749
												ADGRG6	-0.201951	-0.385488	-0.0184148	5.8143	-2.17195	0.0312334	0.18619	-3.79731	1.50538	-1.50538
												ADGRG7	0.0282524	-0.166187	0.222692	4.78172	0.286811	0.774603	0.901298	-5.95407	0.110921	0.110921
												ADGRL1	-0.0577702	-0.21169	0.0961494	9.57806	-0.740858	0.459793	0.707015	-5.73417	0.337438	-0.337438
												ADGRL2	0.52772	0.195528	0.859911	8.45852	3.13574	0.00201761	0.0480507	-1.48595	2.69516	2.69516
												ADGRL3	-0.22498	-0.471372	0.0214118	9.84725	-1.80237	0.0732448	0.283278	-4.47419	1.13522	-1.13522
												ADGRL4	-0.0189729	-0.311175	0.27323	7.51596	-0.128167	0.898167	0.955398	-5.98515	0.0466429	-0.0466429
												ADGRV1	-0.308205	-0.597733	-0.0186772	8.23878	-2.10124	0.0370826	0.203221	-3.93607	1.43083	-1.43083
												ADH1A	-0.0111912	-0.0689204	0.046538	5.3901	-0.382653	0.702451	0.860708	-5.9238	0.153384	-0.153384
												ADH1B	-0.00337923	-0.0624805	0.055722	5.67718	-0.112862	0.910272	0.961222	-5.98689	0.0408287	-0.0408287
												ADH1C	0.0332451	-0.0150567	0.0815469	4.5119	1.3586	0.17606	0.434247	-5.12628	0.754339	0.754339
												ADH4	-0.0328153	-0.123378	0.057747	7.7243	-0.715244	0.475431	0.716717	-5.75173	0.322912	-0.322912
												ADH5	0.0841918	-0.0298479	0.198232	10.2395	1.45727	0.146872	0.397783	-4.99667	0.83306	0.83306
												ADH6	-0.0360551	-0.09458	0.0224698	6.41458	-1.21605	0.225638	0.494813	-5.29781	0.646588	-0.646588
												ADH7	-0.0203011	-0.0707628	0.0301606	5.6876	-0.794115	0.428227	0.683236	-5.69571	0.368326	-0.368326
												ADHFE1	-0.205666	-0.365379	-0.0459523	8.55102	-2.54183	0.0119137	0.111819	-3.0016	1.92396	-1.92396
												ADI1	0.065754	-0.0681202	0.199628	10.8936	0.969506	0.333659	0.602177	-5.55036	0.476697	0.476697
												ADIG	-0.00756256	-0.0778795	0.0627544	7.8596	-0.212292	0.832131	0.928237	-5.97163	0.0798081	-0.0798081
												ADIPOQ	-0.0266698	-0.0686378	0.0152982	4.31172	-1.25437	0.211415	0.476922	-5.25352	0.674865	-0.674865
												ADIPOR1	0.111257	0.00332307	0.21919	9.83196	2.03467	0.0434245	0.219668	-4.06271	1.36227	1.36227
												ADIPOR2	-0.105556	-0.26249	0.0513775	10.0582	-1.32768	0.18605	0.446878	-5.16506	0.730371	-0.730371
												ADIRF	-0.350166	-0.667568	-0.0327645	7.97239	-2.17766	0.0307978	0.184564	-3.78592	1.51148	-1.51148
												ADIRF-AS1	-0.0326088	-0.122071	0.0568536	7.27883	-0.719481	0.472824	0.714706	-5.74886	0.3253	-0.3253
												ADK	-0.069689	-0.197534	0.0581561	8.92601	-1.07598	0.283447	0.556501	-5.44818	0.547528	-0.547528
												ADM	0.800914	0.280272	1.32156	9.92228	3.03649	0.00276743	0.0559449	-1.75906	2.55792	2.55792
												ADM2	0.0105428	-0.048567	0.0696526	7.55923	0.352065	0.725222	0.873301	-5.9344	0.139529	0.139529
												ADM5	-0.048786	-0.132023	0.0344506	6.59829	-1.15693	0.248912	0.522485	-5.36348	0.603954	-0.603954
												ADNP	0.0927939	-0.0602782	0.245866	10.4647	1.1966	0.233115	0.503264	-5.31977	0.632429	0.632429
												ADNP2	0.0647056	-0.0521296	0.181541	8.96206	1.09318	0.275847	0.549855	-5.43068	0.559332	0.559332
												ADO	-0.205255	-0.365707	-0.0448023	9.38825	-2.52506	0.0124753	0.113934	-3.04017	1.90395	-1.90395
												ADORA1	0.160163	-0.0408977	0.361224	9.18769	1.57239	0.117704	0.355009	-4.83429	0.929208	0.929208
												ADORA2A	-0.00810863	-0.0804015	0.0641843	6.71664	-0.2214	0.825045	0.925334	-5.96977	0.0835225	-0.0835225
												ADORA2A-AS1	-0.0392584	-0.106742	0.0282248	6.76761	-1.14832	0.252438	0.526089	-5.37278	0.597846	-0.597846
												ADORA2B	0.0726431	-0.159409	0.304695	7.51195	0.617922	0.537447	0.760392	-5.81282	0.269664	0.269664
												ADORA3	0.00836691	-0.208909	0.225642	8.64779	0.0760115	0.939499	0.974305	-5.99018	0.0271039	0.0271039
												ADPGK	0.127412	0.0105953	0.244229	9.77025	2.15293	0.032722	0.191302	-3.83505	1.48516	1.48516
												ADPRH	0.0325647	-0.0598651	0.124995	7.26018	0.695441	0.48772	0.724746	-5.76488	0.311829	0.311829
												ADPRHL1	-0.0501311	-0.112803	0.0125404	7.12126	-1.57893	0.116196	0.353397	-4.82471	0.934808	-0.934808
												ADPRHL2	0.162604	0.0456326	0.279574	9.49999	2.74396	0.00671659	0.0850077	-2.51808	2.17285	2.17285
												ADPRM	-0.0559104	-0.130714	0.0188929	7.64157	-1.47536	0.141951	0.390397	-4.97195	0.847861	-0.847861
												ADRA1A	-0.113627	-0.223003	-0.0042522	5.66401	-2.05064	0.0418244	0.215829	-4.03268	1.37857	-1.37857
												ADRA1B	0.037397	-0.0308596	0.105654	5.18847	1.08148	0.281004	0.554751	-5.44262	0.551287	0.551287
												ADRA1D	0.039685	-0.0524187	0.131789	5.57979	0.850501	0.396233	0.656484	-5.65211	0.402049	0.402049
												ADRA2A	-0.216081	-0.414134	-0.0180279	5.85937	-2.15358	0.0326707	0.191261	-3.83378	1.48584	-1.48584
												ADRA2B	-0.0221208	-0.095191	0.0509494	7.23727	-0.597565	0.550919	0.770208	-5.82448	0.258913	-0.258913
												ADRA2C	-0.0954575	-0.197401	0.00648599	6.99649	-1.84831	0.0662798	0.269969	-4.39658	1.17862	-1.17862
												ADRB1	-0.507241	-0.878144	-0.136337	7.62843	-2.69947	0.00764086	0.0903331	-2.6274	2.11686	-2.11686
												ADRB2	-0.0491545	-0.243433	0.145124	6.74355	-0.499417	0.618126	0.813663	-5.87522	0.208923	-0.208923
												ADRB3	-0.0512859	-0.11167	0.00909826	6.84007	-1.67649	0.0954657	0.320842	-4.67716	1.02015	-1.02015
												ADRM1	0.143513	0.0370764	0.249949	9.83446	2.66149	0.0085192	0.0950378	-2.71943	2.0696	2.0696
												ADSL	-0.0191331	-0.156905	0.118639	9.50052	-0.274127	0.784317	0.905801	-5.95743	0.105508	-0.105508
												ADSS	0.109853	-0.0188118	0.238519	8.73317	1.6853	0.0937502	0.318307	-4.66341	1.02803	1.02803
												ADSSL1	0.417674	0.104172	0.731177	7.57374	2.6298	0.00932096	0.0993901	-2.79533	2.03054	2.03054
												ADTRP	-0.0441977	-0.115736	0.027341	7.28145	-1.21951	0.224328	0.493045	-5.29387	0.649117	-0.649117
												AEBP1	0.782898	0.401325	1.16447	10.1337	4.04998	7.74719e-05	0.0119143	1.38255	4.11086	4.11086
												AEBP2	0.187534	0.0209367	0.354131	8.98284	2.22197	0.0275945	0.173682	-3.69655	1.55918	1.55918
												AEN	0.095508	-0.0286392	0.219655	8.34379	1.51855	0.130719	0.374573	-4.91173	0.883661	0.883661
												AES	0.191149	0.0537766	0.328522	10.0215	2.74661	0.00666476	0.08479	-2.5115	2.17622	2.17622
												AFAP1	0.117937	-0.0288005	0.264675	6.80633	1.58648	0.114474	0.350429	-4.81359	0.941294	0.941294
												AFAP1-AS1	-0.0193875	-0.0825212	0.0437462	6.71726	-0.606157	0.545212	0.766323	-5.81961	0.263435	-0.263435
												AFAP1L1	0.141392	-0.0517157	0.3345	7.23678	1.44528	0.150206	0.402557	-5.01289	0.823312	0.823312
												AFAP1L2	-0.246482	-0.44588	-0.0470849	6.4064	-2.44001	0.0157052	0.128544	-3.23224	1.80396	-1.80396
												AFDN	0.0662432	-0.110494	0.24298	9.7952	0.739843	0.460407	0.707405	-5.73488	0.336858	0.336858
												AFDN-DT	-0.104576	-0.277228	0.0680756	6.6337	-1.1956	0.233503	0.503545	-5.32089	0.631707	-0.631707
												AFF1	0.124399	-0.0237987	0.272598	10.1959	1.65692	0.0993654	0.326456	-4.70744	1.00276	1.00276
												AFF2	-0.147953	-0.243181	-0.052725	7.22493	-3.06679	0.00251495	0.053268	-1.67651	2.59947	-2.59947
												AFF3	-0.459797	-0.825839	-0.0937547	8.07457	-2.47948	0.014124	0.122149	-3.14387	1.85004	-1.85004
												AFF4	0.0220666	-0.0892105	0.133344	9.68124	0.391431	0.695965	0.856322	-5.92059	0.157413	0.157413
												AFG1L	-0.0216852	-0.0770851	0.0337148	4.9037	-0.772643	0.440798	0.691506	-5.71154	0.35576	-0.35576
												AFG3L1P	0.072578	-0.0614913	0.206647	8.24151	1.06857	0.286768	0.559957	-5.45563	0.542469	0.542469
												AFG3L2	-0.00198556	-0.112881	0.10891	10.281	-0.0353423	0.971848	0.988378	-5.99232	0.0124017	-0.0124017
												AFM	-0.00493558	-0.0523975	0.0425264	5.09781	-0.205266	0.837608	0.930022	-5.97302	0.0769594	-0.0769594
												AFMID	-0.0174697	-0.0939723	0.0590328	6.52105	-0.450749	0.65274	0.834623	-5.89703	0.18526	-0.18526
												AFP	0.0347202	-0.0460174	0.115458	5.74067	0.848852	0.397147	0.65711	-5.65342	0.401048	0.401048
												AFTPH	0.0290605	-0.0460777	0.104199	9.80697	0.763427	0.446258	0.696098	-5.7182	0.350414	0.350414
												AGA	0.132156	-0.047047	0.31136	8.40115	1.45568	0.147309	0.398614	-4.99882	0.831771	0.831771
												AGAP1	0.00363217	-0.180256	0.18752	9.63029	0.0389887	0.968945	0.987197	-5.99219	0.013701	0.013701
												AGAP10P	-0.0526403	-0.162664	0.0573831	9.60636	-0.944405	0.346292	0.613218	-5.57291	0.460558	-0.460558
												AGAP11	-0.0526403	-0.162664	0.0573831	9.60636	-0.944405	0.346292	0.613218	-5.57291	0.460558	-0.460558
												AGAP12P	-0.0526403	-0.162664	0.0573831	9.60636	-0.944405	0.346292	0.613218	-5.57291	0.460558	-0.460558
												AGAP14P	-0.0526403	-0.162664	0.0573831	9.60636	-0.944405	0.346292	0.613218	-5.57291	0.460558	-0.460558
												AGAP2	-0.117346	-0.30084	0.0661484	7.68683	-1.26232	0.208547	0.473693	-5.24417	0.680796	-0.680796
												AGAP2-AS1	0.304193	0.0347865	0.5736	7.62302	2.22878	0.0271288	0.172206	-3.68267	1.56657	1.56657
												AGAP3	-0.0495862	-0.162982	0.0638095	9.47305	-0.863157	0.389257	0.650657	-5.64191	0.409763	-0.409763
												AGAP4	-0.0526403	-0.162664	0.0573831	9.60636	-0.944405	0.346292	0.613218	-5.57291	0.460558	-0.460558
												AGAP5	-0.0526403	-0.162664	0.0573831	9.60636	-0.944405	0.346292	0.613218	-5.57291	0.460558	-0.460558
												AGAP6	-0.0526403	-0.162664	0.0573831	9.60636	-0.944405	0.346292	0.613218	-5.57291	0.460558	-0.460558
												AGAP7P	-0.0526403	-0.162664	0.0573831	9.60636	-0.944405	0.346292	0.613218	-5.57291	0.460558	-0.460558
												AGAP9	-0.0526403	-0.162664	0.0573831	9.60636	-0.944405	0.346292	0.613218	-5.57291	0.460558	-0.460558
												AGBL1	-0.0383343	-0.105591	0.0289225	5.43885	-1.12506	0.262135	0.536695	-5.39754	0.581475	-0.581475
												AGBL2	0.222473	0.0172933	0.427653	5.48302	2.14027	0.0337471	0.194163	-3.86001	1.47176	1.47176
												AGBL3	0.0867115	-0.0805428	0.253966	5.00043	1.02335	0.307584	0.57902	-5.5	0.512036	0.512036
												AGBL4	-0.0268887	-0.0962212	0.0424438	5.35014	-0.765524	0.445012	0.695133	-5.71669	0.351628	-0.351628
												AGBL5	0.174895	0.0588373	0.290953	7.93762	2.9746	0.00335722	0.0613804	-1.92541	2.47402	2.47402
												AGER	0.0164524	-0.0631179	0.0960227	6.64596	0.408135	0.683684	0.850935	-5.91429	0.165144	0.165144
												AGFG1	-0.0128695	-0.105489	0.0797497	9.06342	-0.274274	0.784204	0.905767	-5.9574	0.105571	-0.105571
												AGFG2	0.0304141	-0.115366	0.176194	8.61352	0.411814	0.68099	0.849315	-5.91287	0.166859	0.166859
												AGGF1	-0.0286551	-0.138999	0.0816888	9.32565	-0.5126	0.608891	0.807329	-5.86893	0.215461	-0.215461
												AGK	0.168119	0.0736992	0.26254	10.0932	3.51462	0.000563391	0.0267716	-0.372854	3.24919	3.24919
												AGL	-0.0876253	-0.258231	0.0829809	9.21875	-1.01382	0.312098	0.583787	-5.50911	0.505708	-0.505708
												AGMAT	0.00681484	-0.0593833	0.073013	6.20365	0.203205	0.839216	0.930906	-5.97341	0.0761265	0.0761265
												AGO1	-0.0228334	-0.115207	0.06954	9.00515	-0.48792	0.62623	0.819216	-5.88058	0.203266	-0.203266
												AGO2	-0.0145298	-0.157679	0.12862	9.64167	-0.200352	0.841443	0.931829	-5.97396	0.0749755	-0.0749755
												AGO3	-0.0677704	-0.211006	0.0754652	8.28149	-0.933931	0.351653	0.617985	-5.58215	0.453885	-0.453885
												AGO4	-0.0351095	-0.179428	0.109209	8.8688	-0.480206	0.631693	0.822715	-5.8841	0.199494	-0.199494
												AGPAT1	0.0479582	-0.0616344	0.157551	10.5879	0.863788	0.388911	0.650469	-5.6414	0.410149	0.410149
												AGPAT2	0.112	0.0304397	0.19356	8.48983	2.7106	0.0073995	0.0890544	-2.60021	2.1308	2.1308
												AGPAT3	0.0397861	-0.0788156	0.158388	10.0203	0.662164	0.508755	0.739464	-5.78615	0.293491	0.293491
												AGPAT4	-0.164897	-0.374594	0.0447996	8.25115	-1.5522	0.12246	0.362994	-4.86364	0.912007	-0.912007
												AGPAT4-IT1	-0.0894536	-0.24122	0.0623129	7.95414	-1.16345	0.246265	0.518952	-5.3564	0.608598	-0.608598
												AGPAT5	0.0815034	-0.0863075	0.249314	10.8119	0.958696	0.339062	0.606717	-5.56014	0.46972	0.46972
												AGPS	-0.0276321	-0.147395	0.0921304	8.36146	-0.455427	0.649378	0.832475	-5.89503	0.187502	-0.187502
												AGR2	-0.0143014	-0.0755605	0.0469577	5.54039	-0.460823	0.64551	0.830482	-5.8927	0.190097	-0.190097
												AGR3	0.0589159	-0.0317291	0.149561	4.61935	1.28296	0.201237	0.46479	-5.21961	0.696291	0.696291
												AGRN	0.122167	-0.0386535	0.282989	9.85447	1.49947	0.135591	0.381227	-4.93853	0.867769	0.867769
												AGRP	0.0111492	-0.04086	0.0631583	7.62855	0.423144	0.672721	0.845379	-5.90841	0.172165	0.172165
												AGT	0.173577	-0.112707	0.459861	11.8101	1.1968	0.233039	0.50325	-5.31955	0.632572	0.632572
												AGTPBP1	-0.236203	-0.457633	-0.0147733	8.90573	-2.10559	0.0366966	0.20182	-3.92764	1.43537	-1.43537
												AGTR1	0.170337	-0.0329808	0.373656	5.83153	1.65371	0.100017	0.327476	-4.71238	0.999927	0.999927
												AGTR2	-0.00770635	-0.0544067	0.038994	5.83502	-0.325727	0.745028	0.88501	-5.94283	0.127827	-0.127827
												AGTRAP	0.293422	0.143519	0.443325	8.7913	3.86374	0.000158163	0.0158915	0.748413	3.8009	3.8009
												AGXT	-0.0300299	-0.115385	0.0553253	6.74214	-0.694463	0.488332	0.724908	-5.76552	0.311285	-0.311285
												AGXT2	-0.0424927	-0.11181	0.0268248	6.86311	-1.21003	0.227933	0.497362	-5.30464	0.642193	-0.642193
												AHCTF1	-0.152006	-0.296187	-0.00782577	8.38989	-2.08104	0.038917	0.208823	-3.9749	1.40986	-1.40986
												AHCY	0.11989	-0.0455943	0.285374	9.24929	1.43005	0.154523	0.407729	-5.0333	0.811008	0.811008
												AHCYL1	-0.184558	-0.373138	0.00402167	12.4153	-1.9318	0.0550328	0.247574	-4.25079	1.25938	-1.25938
												AHCYL2	-0.0895156	-0.269363	0.0903315	10.1287	-0.982472	0.327252	0.596278	-5.53847	0.485118	-0.485118
												AHCYP8	-0.0638737	-0.149185	0.0214376	4.94727	-1.47788	0.141274	0.389929	-4.96847	0.849938	-0.849938
												AHDC1	-0.00647437	-0.168093	0.155144	7.94437	-0.0790738	0.937066	0.9737	-5.98996	0.0282297	-0.0282297
												AHI1	-0.0181054	-0.178578	0.142367	9.27776	-0.222706	0.824029	0.925013	-5.96949	0.0840573	-0.0840573
												AHNAK	0.241093	0.0308095	0.451376	10.2918	2.2631	0.0248838	0.164967	-3.61206	1.60408	1.60408
												AHNAK2	0.519565	0.136954	0.902177	8.08032	2.68045	0.00806995	0.0927357	-2.67364	2.09313	2.09313
												AHR	0.286073	-0.044111	0.616257	8.3387	1.7102	0.0890389	0.310691	-4.6242	1.05042	1.05042
												AHRR	-0.0595365	-0.193879	0.0748063	6.39616	-0.87477	0.382923	0.646055	-5.63242	0.416888	-0.416888
												AHSA1	-0.0180114	-0.110811	0.0747884	9.98199	-0.383112	0.702112	0.860617	-5.92363	0.153594	-0.153594
												AHSA2P	0.196698	-0.00145668	0.394853	9.41709	1.95939	0.051689	0.239843	-4.20126	1.2866	1.2866
												AHSG	-0.0360938	-0.0805928	0.00840516	6.50607	-1.60106	0.111205	0.344927	-4.79198	0.953877	-0.953877
												AHSP	-0.0269087	-0.0929744	0.039157	7.32336	-0.803974	0.422526	0.677337	-5.6883	0.374147	-0.374147
												AICDA	-0.00141467	-0.0553532	0.0525239	5.55762	-0.0517704	0.958772	0.982413	-5.99164	0.0182847	-0.0182847
												AIDA	0.0388126	-0.046555	0.12418	11.2083	0.897439	0.370744	0.634491	-5.61355	0.430926	0.430926
												AIF1	0.113955	-0.0998024	0.327713	10.0187	1.0523	0.294145	0.566322	-5.47181	0.531439	0.531439
												AIF1L	-0.204869	-0.486835	0.0770974	10.6454	-1.43418	0.153342	0.406408	-5.02779	0.814338	-0.814338
												AIFM1	0.103163	0.00951519	0.19681	8.54334	2.17446	0.0310411	0.185609	-3.7923	1.50806	1.50806
												AIFM2	0.0885339	0.0131008	0.163967	7.92496	2.31672	0.0217022	0.153118	-3.49978	1.6635	1.6635
												AIFM3	-0.260937	-0.468963	-0.0529121	7.47847	-2.47597	0.0142585	0.122722	-3.15178	1.84593	-1.84593
												AIG1	-0.081474	-0.236101	0.0731528	8.73473	-1.04006	0.299776	0.571666	-5.48382	0.523204	-0.523204
												AIM2	-0.0314443	-0.1762	0.113311	6.99553	-0.428777	0.668624	0.843199	-5.90614	0.174818	-0.174818
												AIMP1	0.0885843	-0.0345158	0.211684	9.76233	1.42044	0.157295	0.411415	-5.04608	0.803284	0.803284
												AIMP2	0.177674	0.0456273	0.30972	10.3972	2.65596	0.00865444	0.0959223	-2.73273	2.06276	2.06276
												AIP	-0.0354833	-0.122685	0.0517181	9.39076	-0.803204	0.422969	0.677745	-5.68888	0.373691	-0.373691
												AIPL1	-0.0450736	-0.124046	0.0338984	6.45003	-1.12661	0.261481	0.536011	-5.39591	0.582559	-0.582559
												AIRE	0.00174876	-0.0588065	0.062304	6.66636	0.0570037	0.954609	0.980544	-5.99137	0.0201746	0.0201746
												AJAP1	-0.328263	-0.530187	-0.126338	6.37066	-3.20891	0.00159052	0.0430444	-1.27963	2.79846	-2.79846
												AJM1	-0.0464517	-0.166349	0.0734452	6.70675	-0.764748	0.445473	0.695528	-5.71725	0.351179	-0.351179
												AJUBA	0.495057	0.237314	0.7528	7.03006	3.79134	0.000207342	0.0177818	0.508577	3.68331	3.68331
												AK1	0.0255064	-0.212659	0.263672	9.66275	0.211396	0.83283	0.928476	-5.97181	0.0794439	0.0794439
												AK2	0.229141	0.0808796	0.377402	9.57832	3.0507	0.00264623	0.0548104	-1.72043	2.57737	2.57737
												AK3	0.00802171	-0.157677	0.17372	11.0432	0.0955594	0.923982	0.967301	-5.9886	0.0343364	0.0343364
												AK3P3	0.0798985	-0.0945602	0.254357	6.98306	0.904006	0.367261	0.630888	-5.60799	0.435025	0.435025
												AK4	0.371631	0.100601	0.64266	10.567	2.70658	0.00748585	0.0896217	-2.61004	2.12576	2.12576
												AK4P1	0.335915	0.0451941	0.626636	10.2039	2.28075	0.0237941	0.161235	-3.57537	1.62353	1.62353
												AK4P3	0.335915	0.0451941	0.626636	10.2039	2.28075	0.0237941	0.161235	-3.57537	1.62353	1.62353
												AK5	-0.459038	-0.948637	0.0305612	8.29943	-1.85069	0.0659355	0.269424	-4.39252	1.18088	-1.18088
												AK6	0.031343	-0.0914309	0.154117	9.26007	0.503918	0.614966	0.811734	-5.8731	0.211149	0.211149
												AK7	-0.0281284	-0.0813162	0.0250595	8.25763	-1.0439	0.298003	0.56994	-5.48007	0.525779	-0.525779
												AK8	-0.0487256	-0.141399	0.0439475	7.82192	-1.03784	0.300809	0.572773	-5.48599	0.52171	-0.52171
												AK9	-0.0482461	-0.165898	0.0694057	6.65897	-0.809448	0.41938	0.674706	-5.68415	0.377393	-0.377393
												AKAP1	-0.121892	-0.252638	0.00885494	9.7793	-1.84022	0.0674658	0.271909	-4.4104	1.17092	-1.17092
												AKAP10	-0.0767319	-0.190026	0.0365624	8.56721	-1.33688	0.183033	0.443867	-5.15361	0.737471	-0.737471
												AKAP11	-0.0857592	-0.277386	0.105868	10.4401	-0.883383	0.378267	0.641206	-5.62531	0.422202	-0.422202
												AKAP12	0.25294	-0.0861942	0.592074	10.7783	1.47221	0.142797	0.391572	-4.97627	0.845282	0.845282
												AKAP13	0.0954769	-0.0783565	0.26931	9.1803	1.08415	0.27982	0.553843	-5.4399	0.553122	0.553122
												AKAP14	0.152227	-0.0475417	0.351996	4.48755	1.50414	0.134385	0.380027	-4.932	0.871651	0.871651
												AKAP17A	0.161764	0.0470243	0.276505	8.97425	2.78287	0.00599257	0.080522	-2.42112	2.22239	2.22239
												AKAP2	0.242575	0.0301164	0.455033	9.7334	2.2537	0.0254818	0.166972	-3.6315	1.59377	1.59377
												AKAP3	-0.190585	-0.297171	-0.0839997	6.97941	-3.52952	0.00053463	0.0259784	-0.326827	3.27195	-3.27195
												AKAP4	-0.0202735	-0.068474	0.027927	5.60798	-0.830238	0.407559	0.665477	-5.66812	0.38981	-0.38981
												AKAP5	-0.0933903	-0.273145	0.0863646	5.96613	-1.02553	0.306561	0.578342	-5.49791	0.513484	-0.513484
												AKAP6	-0.393035	-0.585755	-0.200315	7.54308	-4.02559	8.51818e-05	0.0120826	1.29811	4.06965	-4.06965
												AKAP7	-0.315701	-0.537198	-0.0942027	9.10139	-2.8134	0.00547505	0.0774314	-2.34419	2.26161	-2.26161
												AKAP8	0.152235	0.0571903	0.247279	8.98933	3.16164	0.00185557	0.046322	-1.4134	2.73152	2.73152
												AKAP8L	0.0792312	-0.0349129	0.193375	8.50954	1.37015	0.172432	0.429853	-5.11156	0.763381	0.763381
												AKAP9	0.0637346	-0.0613094	0.188779	9.12162	1.00609	0.315789	0.587209	-5.51643	0.500602	0.500602
												AKIP1	0.0531514	-0.0429054	0.149208	9.15687	1.09222	0.276267	0.55026	-5.43167	0.558671	0.558671
												AKIRIN1	0.0767342	-0.0615047	0.214973	9.66232	1.09568	0.274756	0.548702	-5.42812	0.561053	0.561053
												AKIRIN2	-0.0778936	-0.212408	0.0566203	9.86725	-1.14304	0.254617	0.528789	-5.37845	0.594112	-0.594112
												AKNA	0.0254677	-0.105345	0.156281	8.18437	0.384294	0.701237	0.860349	-5.92321	0.154135	0.154135
												AKNAD1	0.132115	-0.0346177	0.298848	5.19497	1.56407	0.119645	0.358015	-4.84642	0.922105	0.922105
												AKR1A1	0.0274707	-0.0910134	0.145955	9.95901	0.457652	0.647782	0.831802	-5.89407	0.188571	0.188571
												AKR1B1	0.136646	-0.00634829	0.279641	11.3041	1.88627	0.06095	0.25965	-4.33107	1.21503	1.21503
												AKR1B10	-0.0210307	-0.126606	0.0845442	6.36976	-0.393204	0.694657	0.855926	-5.91994	0.158229	-0.158229
												AKR1C1	-0.311625	-0.539947	-0.0833026	8.68313	-2.69407	0.00776052	0.0908884	-2.64056	2.11011	-2.11011
												AKR1C2	-0.311625	-0.539947	-0.0833026	8.68313	-2.69407	0.00776052	0.0908884	-2.64056	2.11011	-2.11011
												AKR1C3	-0.82137	-1.24103	-0.401713	7.24306	-3.86341	0.000158363	0.0158915	0.747291	3.80035	-3.80035
												AKR1C4	-0.0134759	-0.0621783	0.0352265	4.8899	-0.546177	0.585655	0.792417	-5.85218	0.232358	-0.232358
												AKR1C6P	-0.0696092	-0.119281	-0.0199376	6.65378	-2.7662	0.00629357	0.0825566	-2.46281	2.2011	-2.2011
												AKR1D1	-0.0305502	-0.0668458	0.00574529	4.25549	-1.66145	0.0984514	0.325095	-4.70046	1.00678	-1.00678
												AKR1E2	-0.0344384	-0.0956981	0.0268212	7.94176	-1.10967	0.268695	0.543075	-5.41366	0.57074	-0.57074
												AKR7A2	0.0632958	-0.0713884	0.19798	9.62397	0.927649	0.354894	0.620388	-5.58764	0.449901	0.449901
												AKR7A3	0.0494233	-0.0318948	0.130741	8.20636	1.19969	0.231914	0.50188	-5.3163	0.634673	0.634673
												AKT1	0.241246	0.0735649	0.408926	9.82491	2.83989	0.00505928	0.0750559	-2.27681	2.29591	2.29591
												AKT1S1	0.14251	-0.00779435	0.292815	8.56547	1.87154	0.0629742	0.263395	-4.35664	1.20084	1.20084
												AKT2	0.197504	0.0492618	0.345747	9.09679	2.62984	0.00931985	0.0993901	-2.79523	2.03059	2.03059
												AKT3	-0.185581	-0.344346	-0.0268169	9.81535	-2.30731	0.022233	0.155537	-3.51965	1.653	-1.653
												AKTIP	-0.138347	-0.273619	-0.00307548	10.0853	-2.01878	0.0450688	0.224244	-4.09237	1.34612	-1.34612
												ALAD	-0.126406	-0.298438	0.0456254	9.34532	-1.45039	0.148777	0.400621	-5.00599	0.827465	-0.827465
												ALAS1	0.160427	0.0309316	0.289921	9.02241	2.44539	0.0154806	0.12753	-3.22026	1.81021	1.81021
												ALAS2	-0.0282982	-0.128836	0.0722396	6.61902	-0.55559	0.579216	0.78798	-5.84729	0.237159	-0.237159
												ALB	-0.080229	-0.145486	-0.0149721	4.87091	-2.42678	0.0162695	0.131454	-3.26157	1.78863	-1.78863
												ALCAM	-0.390257	-0.702435	-0.0780792	10.6793	-2.4676	0.0145844	0.124236	-3.17061	1.83611	-1.83611
												ALDH16A1	0.161668	0.0351022	0.288234	8.14252	2.52135	0.0126029	0.114565	-3.04869	1.89953	1.89953
												ALDH18A1	0.0241744	-0.128983	0.177331	9.36164	0.311562	0.755752	0.890878	-5.94709	0.121621	0.121621
												ALDH1A1	-0.240884	-0.655566	0.173798	7.60158	-1.14661	0.253139	0.526837	-5.37461	0.596641	-0.596641
												ALDH1A2	-0.0245323	-0.176609	0.127544	7.42833	-0.318421	0.750553	0.888591	-5.94505	0.124618	-0.124618
												ALDH1A3	0.0200098	-0.301694	0.341714	5.95758	0.122775	0.902429	0.957246	-5.98579	0.0445871	0.0445871
												ALDH1B1	0.0509372	-0.0482762	0.150151	7.20182	1.01342	0.312288	0.583787	-5.50949	0.505445	0.505445
												ALDH1L1	0.194797	-0.102752	0.492346	9.35911	1.29226	0.198007	0.460659	-5.20842	0.703319	0.703319
												ALDH1L1-AS2	0.0920249	-0.0558639	0.239914	6.83783	1.22827	0.221028	0.489078	-5.28383	0.655553	0.655553
												ALDH1L2	-0.167328	-0.327672	-0.00698341	6.00028	-2.05987	0.0409227	0.21323	-4.01522	1.38803	-1.38803
												ALDH2	-0.168641	-0.376221	0.038939	10.7379	-1.60363	0.110638	0.344304	-4.78816	0.956097	-0.956097
												ALDH3A1	0.0761328	-0.0320176	0.184283	5.9662	1.38953	0.166473	0.422419	-5.08659	0.778656	0.778656
												ALDH3A2	-0.0363898	-0.165352	0.0925724	9.95971	-0.556984	0.578265	0.787333	-5.84656	0.237873	-0.237873
												ALDH3B1	0.0871723	0.0300319	0.144313	8.42789	3.01134	0.00299448	0.0579669	-1.82701	2.52368	2.52368
												ALDH3B2	0.0129174	-0.0301145	0.0559494	4.81561	0.592529	0.554277	0.771957	-5.8273	0.256273	0.256273
												ALDH4A1	-0.0674586	-0.314283	0.179366	9.27014	-0.539479	0.590256	0.795244	-5.8556	0.228959	-0.228959
												ALDH5A1	-0.241698	-0.495224	0.0118275	9.77073	-1.88181	0.0615563	0.260837	-4.33882	1.21073	-1.21073
												ALDH6A1	-0.18211	-0.385286	0.021066	10.1553	-1.76924	0.0786322	0.29247	-4.52897	1.1044	-1.1044
												ALDH7A1	0.163517	-0.0374639	0.364497	9.51714	1.60595	0.110125	0.343756	-4.78469	0.958115	0.958115
												ALDH7A1P1	0.163517	-0.0374639	0.364497	9.51714	1.60595	0.110125	0.343756	-4.78469	0.958115	0.958115
												ALDH8A1	-0.26188	-0.471785	-0.0519758	6.18902	-2.46267	0.0147791	0.124891	-3.18166	1.83035	-1.83035
												ALDH9A1	-0.0108353	-0.130688	0.109018	11.1263	-0.17845	0.85858	0.939498	-5.97787	0.0662191	-0.0662191
												ALDOA	0.100482	-0.0158263	0.21679	12.9052	1.70531	0.0899485	0.312186	-4.63194	1.04601	1.04601
												ALDOAP2	-0.0757729	-0.160749	0.00920343	5.31545	-1.76012	0.0801719	0.295022	-4.54389	1.09598	-1.09598
												ALDOB	-0.0467386	-0.113143	0.0196657	6.53595	-1.38933	0.166535	0.422419	-5.08686	0.778494	-0.778494
												ALDOC	-0.493072	-0.855667	-0.130478	11.142	-2.6842	0.00798373	0.0922479	-2.66456	2.09779	-2.09779
												ALG1	0.156743	0.051606	0.26188	7.12594	2.94278	0.00370346	0.0645096	-2.00973	2.43139	2.43139
												ALG10	0.00240807	-0.0570844	0.0619005	5.00606	0.0798972	0.936412	0.973449	-5.98989	0.0285329	0.0285329
												ALG10B	-0.0737953	-0.246349	0.0987584	6.5585	-0.844169	0.399751	0.658714	-5.65715	0.39821	-0.39821
												ALG11	-0.0224746	-0.147601	0.102651	9.47073	-0.354544	0.723367	0.871994	-5.93358	0.140641	-0.140641
												ALG12	0.0500371	-0.0428982	0.142972	7.44216	1.06276	0.289384	0.56221	-5.46143	0.538525	0.538525
												ALG13	0.00964308	-0.125639	0.144925	8.98964	0.140702	0.88827	0.951526	-5.98356	0.0514549	0.0514549
												ALG14	0.0519666	-0.118194	0.222127	8.03081	0.602825	0.547422	0.767724	-5.82151	0.261678	0.261678
												ALG1L15P	0.165032	0.0590006	0.271063	7.12313	3.07227	0.00247162	0.0529921	-1.6615	2.60702	2.60702
												ALG2	0.214513	0.0487361	0.38029	9.17277	2.5542	0.0115137	0.109741	-2.97298	1.93878	1.93878
												ALG3	0.131733	0.025341	0.238126	8.66263	2.44405	0.0155363	0.127793	-3.22324	1.80865	1.80865
												ALG5	0.213809	0.0657666	0.361851	9.78841	2.85079	0.00489671	0.0745717	-2.24891	2.3101	2.3101
												ALG6	0.217427	0.0236585	0.411195	9.16985	2.21491	0.0280846	0.175018	-3.7109	1.55153	1.55153
												ALG8	0.0776244	-0.0405536	0.195802	9.37283	1.29654	0.196531	0.459112	-5.20323	0.706568	0.706568
												ALG9	0.0104817	-0.0976458	0.118609	8.17196	0.191347	0.84848	0.93447	-5.97562	0.0713582	0.0713582
												ALK	-0.226539	-0.405116	-0.0479609	7.68463	-2.50403	0.0132132	0.117824	-3.08823	1.87899	-1.87899
												ALKAL2	-0.026404	-0.310079	0.257271	6.06461	-0.183727	0.854445	0.937283	-5.97697	0.068316	-0.068316
												ALKBH1	0.0378989	-0.0526116	0.128409	8.70161	0.82652	0.409658	0.667118	-5.67101	0.387578	0.387578
												ALKBH2	-0.0517535	-0.17414	0.070633	8.27039	-0.834702	0.405047	0.663585	-5.66462	0.392494	-0.392494
												ALKBH3	0.0885871	-0.00677204	0.183946	7.81719	1.83372	0.0684296	0.274085	-4.42143	1.16476	1.16476
												ALKBH3-AS1	-0.00768945	-0.0615179	0.046139	6.53344	-0.281974	0.778304	0.902637	-5.95537	0.108851	-0.108851
												ALKBH4	0.109411	0.0269817	0.191841	8.08173	2.62002	0.00958168	0.100595	-2.81858	2.01856	2.01856
												ALKBH5	0.142095	0.0430674	0.241123	10.1962	2.83235	0.00517453	0.0756191	-2.29603	2.28613	2.28613
												ALKBH6	0.076062	-0.0638418	0.215966	8.03645	1.07316	0.284709	0.557841	-5.45102	0.545599	0.545599
												ALKBH7	0.136	-0.0203249	0.292325	9.11469	1.71726	0.0877379	0.309109	-4.61297	1.05681	1.05681
												ALKBH8	-0.0297405	-0.130243	0.0707622	7.29389	-0.584112	0.559913	0.77515	-5.83197	0.251879	-0.251879
												ALLC	-0.074059	-0.184033	0.0359146	6.12584	-1.32927	0.185524	0.446427	-5.16308	0.7316	-0.7316
												ALMS1	0.0139768	-0.0804807	0.108434	8.72642	0.292077	0.770581	0.899759	-5.95264	0.113182	0.113182
												ALMS1-IT1	-0.0346516	-0.14782	0.0785163	5.32193	-0.604401	0.546376	0.767319	-5.82061	0.262508	-0.262508
												ALMS1P1	-0.0191789	-0.091578	0.0532201	6.25555	-0.522898	0.601721	0.802956	-5.86391	0.220605	-0.220605
												ALOX12	-0.0601465	-0.114084	-0.00620853	6.40426	-2.20111	0.0290647	0.178348	-3.73884	1.53663	-1.53663
												ALOX12-AS1	0.00641583	-0.0862775	0.0991091	7.63872	0.136625	0.891488	0.9529	-5.98409	0.0498847	0.0498847
												ALOX12B	-0.0226252	-0.110755	0.0655046	5.42979	-0.506752	0.61298	0.809957	-5.87175	0.212553	-0.212553
												ALOX12P2	-0.00167412	-0.0650445	0.0616962	7.32029	-0.0521467	0.958473	0.982245	-5.99162	0.0184203	-0.0184203
												ALOX15	-0.0571624	-0.110688	-0.00363711	5.40632	-2.10803	0.0364824	0.20121	-3.92293	1.43792	-1.43792
												ALOX15B	-0.0610206	-0.236889	0.114847	6.82469	-0.684881	0.494344	0.727955	-5.77174	0.305971	-0.305971
												ALOX5	0.269785	-0.0343902	0.57396	8.58455	1.75073	0.0817815	0.298732	-4.55916	1.08735	1.08735
												ALOX5AP	0.583048	0.200651	0.965444	10.0361	3.00965	0.0030104	0.0581416	-1.83158	2.52137	2.52137
												ALOXE3	-0.0170391	-0.0852847	0.0512066	6.58449	-0.492829	0.622764	0.816918	-5.87831	0.205677	-0.205677
												ALPG	-0.00477431	-0.0680821	0.0585335	7.46932	-0.14886	0.881839	0.948997	-5.98245	0.0546107	-0.0546107
												ALPI	-0.0390732	-0.115691	0.037545	5.9728	-1.00664	0.315528	0.587093	-5.51592	0.500961	-0.500961
												ALPK1	0.164515	0.00328158	0.325748	7.87457	2.01408	0.0455654	0.225518	-4.10111	1.34136	1.34136
												ALPK2	0.0472556	-0.218532	0.313043	6.53218	0.350949	0.726057	0.873781	-5.93477	0.139029	0.139029
												ALPK3	0.207008	0.0349466	0.379069	7.0885	2.37481	0.0186631	0.141401	-3.37532	1.72902	1.72902
												ALPL	-0.144526	-0.275791	-0.0132611	6.78528	-2.17331	0.0311288	0.185875	-3.79459	1.50684	-1.50684
												ALPP	-0.0181546	-0.0765498	0.0402407	7.29503	-0.613668	0.540249	0.762633	-5.81529	0.267406	-0.267406
												ALS2	0.0111666	-0.0816389	0.103972	8.83713	0.237505	0.812548	0.919317	-5.96628	0.0901508	0.0901508
												ALS2CL	-0.0342616	-0.116522	0.0479986	8.1259	-0.822135	0.412142	0.668609	-5.67441	0.384953	-0.384953
												ALS2CR12	0.00880575	-0.0557399	0.0733514	5.81553	0.269293	0.788028	0.907463	-5.95867	0.103458	0.103458
												ALX1	0.0310167	-0.0551127	0.117146	7.10912	0.710835	0.478152	0.718614	-5.75468	0.320434	0.320434
												ALX3	0.0556883	-0.0415466	0.152923	7.11444	1.13049	0.259849	0.534649	-5.39181	0.585279	0.585279
												ALX4	0.0125742	-0.039725	0.0648734	5.96808	0.474581	0.63569	0.824493	-5.88663	0.196755	0.196755
												ALYREF	0.221944	0.00738294	0.436505	8.79726	2.04182	0.0427018	0.218018	-4.04929	1.36955	1.36955
												AMACR	-0.0518554	-0.163013	0.0593024	7.48351	-0.92083	0.358433	0.623009	-5.59357	0.445592	-0.445592
												AMBN	-0.024226	-0.0962721	0.0478201	6.42026	-0.663739	0.507749	0.738639	-5.78516	0.294351	-0.294351
												AMBP	0.0270039	-0.0311186	0.0851263	5.45374	0.917081	0.360389	0.624817	-5.5968	0.443229	0.443229
												AMBRA1	0.015755	-0.0499236	0.0814335	8.94906	0.4735	0.636459	0.824721	-5.88711	0.19623	0.19623
												AMD1	-0.0107666	-0.196206	0.174673	10.0165	-0.114605	0.908893	0.960406	-5.98671	0.0414874	-0.0414874
												AMD1P3	-0.00651078	-0.192848	0.179826	10.0123	-0.0689698	0.945094	0.97672	-5.99066	0.024525	-0.024525
												AMDHD1	-0.0493876	-0.129319	0.0305433	4.67187	-1.21963	0.22428	0.492991	-5.29373	0.649209	-0.649209
												AMDHD2	0.0191214	-0.0669876	0.105231	8.16415	0.438326	0.661702	0.839999	-5.90224	0.179338	0.179338
												AMELX	-0.0087107	-0.0426686	0.0252472	5.19319	-0.506334	0.613273	0.810194	-5.87194	0.212346	-0.212346
												AMELY	-0.0228526	-0.0736714	0.0279662	6.34127	-0.887639	0.375979	0.638929	-5.62177	0.424837	-0.424837
												AMER1	0.00458369	-0.0619217	0.0710891	5.53173	0.136045	0.891945	0.952933	-5.98417	0.0496619	0.0496619
												AMER2	-0.624843	-1.03611	-0.213571	10.4108	-2.99894	0.00311269	0.0590863	-1.86035	2.50686	-2.50686
												AMER3	-0.0588453	-0.136023	0.0183328	6.83097	-1.50502	0.134159	0.379796	-4.93077	0.872382	-0.872382
												AMFR	0.117382	-0.0433073	0.278071	8.91716	1.44192	0.151151	0.403695	-5.01742	0.820589	0.820589
												AMH	0.0589529	-0.144287	0.262193	6.55514	0.57256	0.567693	0.780536	-5.83827	0.245886	0.245886
												AMHR2	-0.0544746	-0.129102	0.0201523	6.96397	-1.44087	0.151447	0.40402	-5.01883	0.819741	-0.819741
												AMIGO1	0.0479056	-0.116455	0.212266	8.07378	0.575326	0.565825	0.779068	-5.83677	0.247318	0.247318
												AMIGO2	0.193681	-0.1742	0.561562	7.45618	1.03921	0.300169	0.572067	-5.48465	0.522634	0.522634
												AMIGO3	0.0904042	0.022054	0.158754	7.90766	2.6108	0.00983335	0.101766	-2.84042	2.0073	2.0073
												AMMECR1	0.174654	-0.0162966	0.365605	7.14791	1.80544	0.0727608	0.282207	-4.46906	1.1381	1.1381
												AMMECR1L	0.133935	-0.00467201	0.272541	9.06033	1.90737	0.0581454	0.254488	-4.2941	1.23548	1.23548
												AMN	-0.0222023	-0.0896708	0.0452663	7.54659	-0.649563	0.516844	0.746083	-5.79393	0.28664	-0.28664
												AMN1	-0.287186	-0.478234	-0.0961385	8.15301	-2.9672	0.00343492	0.0619409	-1.94508	2.46408	-2.46408
												AMOT	-0.097991	-0.193095	-0.00288715	5.28008	-2.03382	0.043511	0.219967	-4.0643	1.3614	-1.3614
												AMOTL1	0.0159562	-0.135337	0.167249	9.18428	0.208179	0.835337	0.929477	-5.97245	0.0781385	0.0781385
												AMOTL2	-0.302911	-0.544456	-0.0613657	9.28809	-2.47538	0.0142813	0.122836	-3.15311	1.84523	-1.84523
												AMPD1	-0.0616345	-0.121268	-0.00200147	5.01875	-2.04015	0.0428698	0.218573	-4.05243	1.36785	-1.36785
												AMPD2	0.0541116	-0.0612921	0.169515	9.84528	0.925542	0.355985	0.621235	-5.58948	0.448568	0.448568
												AMPD3	0.0887572	-0.155221	0.332736	8.69911	0.718087	0.473681	0.715441	-5.74981	0.324514	0.324514
												AMPH	-0.441247	-0.789317	-0.093177	8.44974	-2.50231	0.0132755	0.118125	-3.09216	1.87695	-1.87695
												AMT	0.0795815	-0.0445	0.203663	8.4212	1.26599	0.207235	0.472456	-5.23983	0.683538	0.683538
												AMY1A	-0.141739	-0.429201	0.145722	7.20141	-0.973277	0.331787	0.600677	-5.54692	0.479141	-0.479141
												AMY1B	-0.141739	-0.429201	0.145722	7.20141	-0.973277	0.331787	0.600677	-5.54692	0.479141	-0.479141
												AMY1C	-0.141739	-0.429201	0.145722	7.20141	-0.973277	0.331787	0.600677	-5.54692	0.479141	-0.479141
												AMY2A	-0.141739	-0.429201	0.145722	7.20141	-0.973277	0.331787	0.600677	-5.54692	0.479141	-0.479141
												AMY2B	-0.04193	-0.198315	0.114455	9.08249	-0.529243	0.597322	0.800022	-5.86076	0.223792	-0.223792
												AMYP1	-0.141739	-0.429201	0.145722	7.20141	-0.973277	0.331787	0.600677	-5.54692	0.479141	-0.479141
												AMZ1	0.0432612	-0.0201154	0.106638	7.74366	1.3474	0.179631	0.439203	-5.14043	0.745618	0.745618
												AMZ2	0.0077047	-0.104037	0.119446	11.0148	0.136102	0.8919	0.952933	-5.98416	0.0496838	0.0496838
												AMZ2P1	0.023469	-0.117468	0.164406	8.44393	0.328695	0.742787	0.884067	-5.94191	0.129136	0.129136
												ANAPC1	0.0242175	-0.0515643	0.0999993	8.51974	0.630796	0.529014	0.753945	-5.80525	0.276533	0.276533
												ANAPC10	0.0964814	-0.0375327	0.230496	7.35792	1.42108	0.15711	0.411192	-5.04523	0.803795	0.803795
												ANAPC11	0.0530531	-0.0554423	0.161548	10.5015	0.965216	0.335796	0.60423	-5.55425	0.473924	0.473924
												ANAPC13	-0.115465	-0.197037	-0.0338928	11.0711	-2.79405	0.00579817	0.0790947	-2.39304	2.23671	-2.23671
												ANAPC15	-0.0847145	-0.181196	0.0117671	8.44083	-1.73316	0.0848658	0.304523	-4.58753	1.07127	-1.07127
												ANAPC16	-0.0877642	-0.188728	0.0131997	9.98901	-1.71584	0.0879983	0.309581	-4.61523	1.05553	-1.05553
												ANAPC2	0.0122212	-0.0967095	0.121152	8.82588	0.221457	0.825	0.925334	-5.96975	0.0835458	0.0835458
												ANAPC4	-7.75816e-06	-0.107877	0.107861	9.46375	-0.000141967	0.999887	0.999904	-5.99291	4.91249e-05	-4.91249e-05
												ANAPC5	-0.0109909	-0.0933208	0.071339	10.7404	-0.263511	0.792473	0.909413	-5.96013	0.101016	-0.101016
												ANAPC7	0.0409542	-0.0353528	0.117261	9.75814	1.0594	0.290909	0.563696	-5.46478	0.536243	0.536243
												ANG	0.350647	0.153551	0.547744	7.48375	3.51169	0.00056921	0.0268442	-0.381878	3.24473	3.24473
												ANGEL1	-0.0216883	-0.115379	0.0720024	8.78437	-0.456935	0.648297	0.831956	-5.89438	0.188226	-0.188226
												ANGEL2	-0.0865393	-0.196358	0.0232791	9.55801	-1.55548	0.121677	0.361593	-4.8589	0.914791	-0.914791
												ANGPT1	0.158805	-0.101386	0.418996	7.17213	1.20475	0.229961	0.50008	-5.31061	0.638346	0.638346
												ANGPT2	0.199228	-0.138666	0.537121	8.65049	1.16384	0.246104	0.518716	-5.35597	0.608881	0.608881
												ANGPT4	-0.00516334	-0.0710748	0.0607481	6.58844	-0.15463	0.877295	0.946789	-5.98162	0.0568545	-0.0568545
												ANGPTL1	0.118107	-0.0778069	0.31402	5.86125	1.18997	0.235705	0.506365	-5.32718	0.627632	0.627632
												ANGPTL2	0.0148457	-0.264196	0.293887	9.79975	0.105016	0.916486	0.964363	-5.9877	0.0378742	0.0378742
												ANGPTL3	-0.0380708	-0.0770368	0.000895284	4.22094	-1.92855	0.0554393	0.248778	-4.25659	1.25618	-1.25618
												ANGPTL4	0.128946	-0.205167	0.463058	8.57075	0.761798	0.447227	0.697155	-5.71937	0.349472	0.349472
												ANGPTL6	0.0628219	-0.0112907	0.136934	6.71324	1.67319	0.0961148	0.321918	-4.68229	1.01721	1.01721
												ANGPTL7	-0.00742354	-0.0724295	0.0575824	5.55178	-0.225415	0.821925	0.923759	-5.96892	0.0851679	-0.0851679
												ANGPTL8	0.0366004	-0.0210113	0.0942122	5.95941	1.25401	0.211546	0.477082	-5.25395	0.674594	0.674594
												ANHX	0.0305902	-0.0324483	0.0936288	8.38778	0.95786	0.339483	0.606801	-5.56089	0.469183	0.469183
												ANK1	-0.0990909	-0.217996	0.0198139	6.82897	-1.64498	0.101807	0.330406	-4.72575	0.992221	-0.992221
												ANK2	-0.0965521	-0.293201	0.100097	11.4559	-0.969157	0.333832	0.602378	-5.55067	0.476472	-0.476472
												ANK3	-0.375643	-0.780011	0.0287249	8.55389	-1.83368	0.0684356	0.274085	-4.4215	1.16472	-1.16472
												ANKAR	-0.0421373	-0.0908657	0.006591	5.11418	-1.70691	0.0896495	0.311877	-4.6294	1.04745	-1.04745
												ANKDD1A	0.0475115	-0.147381	0.242404	8.00419	0.481203	0.630986	0.82239	-5.88365	0.199981	0.199981
												ANKEF1	0.10614	0.00603906	0.206241	5.66295	2.09299	0.0378227	0.205599	-3.95197	1.42225	1.42225
												ANKFN1	-0.0484512	-0.172922	0.07602	7.38984	-0.768354	0.443334	0.693807	-5.71465	0.353269	-0.353269
												ANKFY1	0.0111413	-0.129773	0.152055	10.4894	0.156066	0.876165	0.946296	-5.98141	0.0574142	0.0574142
												ANKH	-0.115275	-0.31213	0.081579	10.598	-1.15589	0.249335	0.522913	-5.36461	0.603217	-0.603217
												ANKHD1	0.0595438	-0.0458494	0.164937	9.78164	1.11519	0.26633	0.540773	-5.40791	0.57458	0.57458
												ANKHD1-EIF4EBP3	0.059624	-0.0457849	0.165033	9.78169	1.11653	0.26576	0.540267	-5.40651	0.575511	0.575511
												ANKIB1	0.0995008	-0.025964	0.224965	10.8971	1.56542	0.119329	0.357623	-4.84446	0.923252	0.923252
												ANKLE1	0.0249762	-0.0358636	0.0858159	4.67536	0.810333	0.418873	0.674243	-5.68347	0.377918	0.377918
												ANKLE2	0.0537928	-0.0557775	0.163363	8.45394	0.969073	0.333874	0.602378	-5.55075	0.476417	0.476417
												ANKMY1	0.0168988	-0.0532309	0.0870285	6.70162	0.475642	0.634935	0.824493	-5.88616	0.197271	0.197271
												ANKMY2	0.204117	0.067015	0.341219	9.76839	2.93874	0.0037497	0.0646158	-2.02038	2.426	2.426
												ANKRA2	-0.01115	-0.150145	0.127845	8.85743	-0.158344	0.874372	0.945246	-5.98107	0.0583038	-0.0583038
												ANKRD1	-0.0183834	-0.0706183	0.0338515	4.79343	-0.694689	0.488191	0.724893	-5.76537	0.31141	-0.31141
												ANKRD10	0.142321	-0.0426686	0.327311	9.95019	1.51861	0.130702	0.374573	-4.91163	0.883717	0.883717
												ANKRD10-IT1	0.1702	-0.0881736	0.428573	9.35424	1.30028	0.195251	0.45779	-5.1987	0.709407	0.709407
												ANKRD11	-0.0482983	-0.139248	0.0426509	9.60796	-1.04823	0.296007	0.567951	-5.47582	0.528698	-0.528698
												ANKRD12	-0.104178	-0.25274	0.0443837	8.6394	-1.38419	0.168101	0.423914	-5.09351	0.774431	-0.774431
												ANKRD13A	0.0329643	-0.0893984	0.155327	9.85607	0.531766	0.595577	0.798778	-5.8595	0.225062	0.225062
												ANKRD13B	-0.162731	-0.30009	-0.0253726	8.17281	-2.33851	0.0205143	0.147937	-3.45342	1.68794	-1.68794
												ANKRD13C	0.0506451	-0.102257	0.203548	8.34674	0.653805	0.514114	0.743741	-5.79133	0.288941	0.288941
												ANKRD13D	0.0566383	-0.0360486	0.149325	7.80131	1.20619	0.229405	0.499245	-5.30898	0.639397	0.639397
												ANKRD16	-0.106758	-0.200582	-0.0129334	7.69912	-2.246	0.0259814	0.168102	-3.64737	1.58534	-1.58534
												ANKRD17	-0.0463125	-0.140958	0.0483328	10.0338	-0.965882	0.335464	0.60393	-5.55365	0.474354	-0.474354
												ANKRD18A	-0.0489997	-0.105581	0.00758191	4.78555	-1.7094	0.0891869	0.310955	-4.62546	1.0497	-1.0497
												ANKRD18B	-0.0332346	-0.0971727	0.0307036	5.99053	-1.02602	0.306328	0.578321	-5.49743	0.513813	-0.513813
												ANKRD19P	0.00999181	-0.0540829	0.0740665	6.71856	0.30781	0.758601	0.892658	-5.94818	0.119987	0.119987
												ANKRD2	-0.048935	-0.132598	0.0347277	6.62064	-1.15455	0.249882	0.523404	-5.36606	0.602265	-0.602265
												ANKRD20A1	-0.227092	-0.534317	0.0801335	9.00115	-1.45905	0.146382	0.396803	-4.99425	0.834513	-0.834513
												ANKRD20A11P	-0.222094	-0.521346	0.0771576	9.01496	-1.46496	0.144764	0.394399	-4.98619	0.839341	-0.839341
												ANKRD20A17P	-0.263669	-0.558584	0.0312463	5.26026	-1.76477	0.0793841	0.293606	-4.5363	1.10027	-1.10027
												ANKRD20A2	-0.227092	-0.534317	0.0801335	9.00115	-1.45905	0.146382	0.396803	-4.99425	0.834513	-0.834513
												ANKRD20A3	-0.227092	-0.534317	0.0801335	9.00115	-1.45905	0.146382	0.396803	-4.99425	0.834513	-0.834513
												ANKRD20A4	-0.227092	-0.534317	0.0801335	9.00115	-1.45905	0.146382	0.396803	-4.99425	0.834513	-0.834513
												ANKRD20A5P	-0.222094	-0.521346	0.0771576	9.01496	-1.46496	0.144764	0.394399	-4.98619	0.839341	-0.839341
												ANKRD20A7P	-0.227092	-0.534317	0.0801335	9.00115	-1.45905	0.146382	0.396803	-4.99425	0.834513	-0.834513
												ANKRD20A8P	-0.263669	-0.558584	0.0312463	5.26026	-1.76477	0.0793841	0.293606	-4.5363	1.10027	-1.10027
												ANKRD20A9P	-0.227092	-0.534317	0.0801335	9.00115	-1.45905	0.146382	0.396803	-4.99425	0.834513	-0.834513
												ANKRD22	-0.0240034	-0.149812	0.101805	8.43257	-0.376608	0.706931	0.863643	-5.92596	0.150623	-0.150623
												ANKRD23	-0.027391	-0.0830498	0.0282678	7.83472	-0.971402	0.332717	0.601575	-5.54863	0.477925	-0.477925
												ANKRD24	0.00779601	-0.0542542	0.0698462	6.33481	0.248002	0.80443	0.914985	-5.96387	0.0945117	0.0945117
												ANKRD26	-0.15365	-0.245445	-0.0618552	6.88415	-3.304	0.00116049	0.0367025	-1.00527	2.93536	-2.93536
												ANKRD27	0.0792155	-0.0353305	0.193762	9.05827	1.36507	0.17402	0.431859	-5.11804	0.759402	0.759402
												ANKRD28	0.0804907	-0.0625698	0.223551	9.75485	1.11058	0.268303	0.54281	-5.41271	0.571374	0.571374
												ANKRD29	-0.10635	-0.388413	0.175712	6.20322	-0.74425	0.457744	0.705377	-5.7318	0.339377	-0.339377
												ANKRD30A	-0.0433361	-0.0824165	-0.00425577	4.59301	-2.18885	0.0299595	0.180947	-3.7635	1.52347	-1.52347
												ANKRD30B	-0.00405463	-0.0516339	0.0435246	4.18063	-0.168213	0.866614	0.941968	-5.97955	0.0621742	-0.0621742
												ANKRD30BL	-0.0933645	-0.167375	-0.0193541	6.11664	-2.49008	0.0137239	0.120187	-3.1199	1.86252	-1.86252
												ANKRD30BP1	0.0058422	-0.0445463	0.0562307	4.14411	0.22886	0.81925	0.922439	-5.96818	0.0865833	0.0865833
												ANKRD30BP2	-0.0933645	-0.167375	-0.0193541	6.11664	-2.49008	0.0137239	0.120187	-3.1199	1.86252	-1.86252
												ANKRD31	-0.0340228	-0.105742	0.0376968	5.08311	-0.936391	0.350389	0.616908	-5.57999	0.455449	-0.455449
												ANKRD33	-0.0105296	-0.0573039	0.0362447	5.77078	-0.444354	0.657347	0.837529	-5.89973	0.182205	-0.182205
												ANKRD33B	-0.0339192	-0.152823	0.0849848	7.39527	-0.563086	0.574112	0.784806	-5.84334	0.241003	-0.241003
												ANKRD34A	-0.173145	-0.333556	-0.0127339	7.51608	-2.13059	0.0345487	0.196174	-3.87899	1.46157	-1.46157
												ANKRD34C	-0.0168433	-0.124576	0.0908896	5.28657	-0.308605	0.757997	0.892303	-5.94795	0.120333	-0.120333
												ANKRD35	0.234275	0.0251736	0.443377	8.0334	2.21154	0.0283212	0.17569	-3.71774	1.54789	1.54789
												ANKRD36	-0.119584	-0.203569	-0.0355997	8.34763	-2.81061	0.00552064	0.0776068	-2.35126	2.25801	-2.25801
												ANKRD36B	-0.119584	-0.203569	-0.0355997	8.34763	-2.81061	0.00552064	0.0776068	-2.35126	2.25801	-2.25801
												ANKRD36BP2	-0.108289	-0.189687	-0.0268923	8.3438	-2.62605	0.00942018	0.0997482	-2.80426	2.02594	-2.02594
												ANKRD36C	-0.396313	-0.623432	-0.169194	6.65872	-3.44437	0.000719617	0.0298321	-0.587552	3.1429	-3.1429
												ANKRD37	0.255662	0.0682748	0.443049	8.08607	2.69309	0.00778235	0.0910946	-2.64294	2.10889	2.10889
												ANKRD39	-0.0210002	-0.0775726	0.0355722	7.84169	-0.73273	0.464724	0.708774	-5.73981	0.332805	-0.332805
												ANKRD40	-0.0969863	-0.248748	0.0547748	10.0235	-1.26146	0.208855	0.474094	-5.24518	0.680154	-0.680154
												ANKRD40CL	-0.0228614	-0.0631495	0.0174267	4.82858	-1.12009	0.264244	0.538913	-5.40278	0.577995	-0.577995
												ANKRD44	-0.276648	-0.471558	-0.0817369	8.15194	-2.80167	0.00566891	0.0784225	-2.37384	2.2465	-2.2465
												ANKRD44-IT1	-0.0350671	-0.0914117	0.0212774	4.90877	-1.2285	0.220945	0.489005	-5.28357	0.655716	-0.655716
												ANKRD45	0.0353199	-0.101116	0.171756	4.80089	0.510994	0.610012	0.807672	-5.86971	0.214661	0.214661
												ANKRD46	-0.323777	-0.525713	-0.12184	9.89144	-3.16487	0.0018362	0.0460677	-1.4043	2.73608	-2.73608
												ANKRD49	-0.0295436	-0.122624	0.0635369	8.8053	-0.626513	0.531812	0.755887	-5.80779	0.274242	-0.274242
												ANKRD50	-0.01654	-0.162752	0.129672	8.5558	-0.223294	0.823572	0.924783	-5.96937	0.0842983	-0.0842983
												ANKRD52	0.00233147	-0.111478	0.116141	8.49747	0.0404367	0.967792	0.986864	-5.99214	0.014218	0.014218
												ANKRD53	0.0756834	0.00512099	0.146246	8.06233	2.11715	0.0356896	0.199391	-3.90521	1.44746	1.44746
												ANKRD54	-0.0611816	-0.153828	0.0314647	8.7237	-1.30352	0.194145	0.456532	-5.19476	0.711874	-0.711874
												ANKRD55	-0.193879	-0.294336	-0.0934225	6.20708	-3.80958	0.000193741	0.0174911	0.568639	3.71278	-3.71278
												ANKRD6	-0.244511	-0.478385	-0.0106366	8.2757	-2.06367	0.0405559	0.212514	-4.00801	1.39195	-1.39195
												ANKRD60	-0.0301076	-0.0974271	0.0372118	5.45764	-0.882798	0.378582	0.641346	-5.62579	0.42184	-0.42184
												ANKRD65	0.0435502	-0.0579913	0.145092	7.30126	0.846587	0.398405	0.657595	-5.65523	0.399675	0.399675
												ANKRD7	0.0274419	-0.0362115	0.0910953	4.43983	0.850977	0.395969	0.656314	-5.65172	0.402339	0.402339
												ANKRD9	0.127132	-0.0681372	0.322401	8.02752	1.28513	0.200481	0.463632	-5.21701	0.697926	0.697926
												ANKS1A	-0.0732262	-0.196454	0.0500013	9.04492	-1.17296	0.242438	0.514718	-5.34599	0.615398	-0.615398
												ANKS1B	-0.452534	-0.860444	-0.0446239	8.99629	-2.18984	0.0298868	0.180807	-3.76152	1.52452	-1.52452
												ANKS3	0.0405711	-0.0435179	0.12466	7.85855	0.952364	0.342253	0.610032	-5.56582	0.465652	0.465652
												ANKS4B	-0.0579947	-0.123667	0.00767788	6.34463	-1.74313	0.0831043	0.30101	-4.57147	1.08038	-1.08038
												ANKS6	-0.00477893	-0.0978551	0.0882973	8.43027	-0.101348	0.919392	0.965529	-5.98806	0.0364991	-0.0364991
												ANKUB1	-0.0202004	-0.0776094	0.0372086	6.5097	-0.694553	0.488276	0.724908	-5.76546	0.311335	-0.311335
												ANKZF1	0.0425097	-0.0607617	0.145781	8.35681	0.812518	0.417621	0.673089	-5.6818	0.379217	0.379217
												ANLN	0.0588316	-0.307616	0.42528	9.01894	0.316901	0.751705	0.889249	-5.9455	0.123953	0.123953
												ANO1	0.0526776	-0.0262126	0.131568	6.82837	1.31804	0.189249	0.450301	-5.17697	0.722966	0.722966
												ANO10	-0.0590752	-0.157583	0.0394324	8.45839	-1.18375	0.23815	0.509281	-5.33409	0.623149	-0.623149
												ANO2	-0.0707545	-0.137512	-0.0039969	5.7353	-2.09208	0.0379046	0.205888	-3.95371	1.42131	-1.42131
												ANO3	-0.266138	-0.623904	0.091628	6.09421	-1.46836	0.143839	0.393427	-4.98154	0.842124	-0.842124
												ANO4	-0.313319	-0.562387	-0.0642505	6.86874	-2.48309	0.0139864	0.121645	-3.1357	1.85429	-1.85429
												ANO5	-0.338055	-0.605352	-0.0707574	6.51983	-2.49642	0.0134898	0.119042	-3.10553	1.86999	-1.86999
												ANO6	0.116079	-0.117692	0.349851	10.3051	0.980141	0.328398	0.597556	-5.54062	0.4836	0.4836
												ANO7	-0.0477444	-0.113028	0.0175388	8.40466	-1.4436	0.150677	0.402967	-5.01515	0.821952	-0.821952
												ANO7L1	-0.028129	-0.102831	0.0465728	6.51339	-0.743273	0.458334	0.705677	-5.73249	0.338818	-0.338818
												ANO8	-0.0408988	-0.19187	0.110072	8.82805	-0.53474	0.593523	0.797414	-5.858	0.226563	-0.226563
												ANO9	-0.0112847	-0.0847888	0.0622195	6.31637	-0.303042	0.762226	0.895137	-5.94956	0.117916	-0.117916
												ANOS1	-0.291707	-0.59921	0.0157967	10.1478	-1.8725	0.0628406	0.263019	-4.35498	1.20176	-1.20176
												ANOS2P	0.0139323	-0.0579057	0.0857703	7.07155	0.38282	0.702328	0.860691	-5.92374	0.15346	0.15346
												ANP32A	-0.0144304	-0.141724	0.112863	11.2462	-0.223769	0.823204	0.924569	-5.96927	0.0844926	-0.0844926
												ANP32B	-0.000928759	-0.12514	0.123282	11.921	-0.0147594	0.988241	0.995234	-5.99281	0.00513699	-0.00513699
												ANP32C	-0.0543149	-0.121147	0.012517	5.74935	-1.60421	0.110509	0.344304	-4.7873	0.956601	-0.956601
												ANP32D	-0.0236072	-0.0776315	0.0304171	4.65736	-0.862543	0.389594	0.650918	-5.64241	0.409388	-0.409388
												ANP32E	0.0125441	-0.0934991	0.118587	10.8408	0.233497	0.815654	0.920894	-5.96717	0.0884939	0.0884939
												ANPEP	0.185789	-0.0903024	0.461881	6.18884	1.32829	0.185849	0.446775	-5.1643	0.730841	0.730841
												ANTXR1	-0.0267681	-0.24371	0.190173	10.9292	-0.243557	0.807865	0.916378	-5.9649	0.0926612	-0.0926612
												ANTXR2	0.427777	0.1806	0.674954	8.65555	3.41614	0.00079316	0.0308648	-0.672773	3.10064	3.10064
												ANXA1	0.839812	0.379849	1.29977	11.2141	3.604	0.00041046	0.0238799	-0.0943511	3.38673	3.38673
												ANXA10	-0.0363688	-0.0978051	0.0250676	6.38605	-1.1685	0.244228	0.516421	-5.35088	0.612205	-0.612205
												ANXA11	0.0230253	-0.17035	0.2164	9.35829	0.235033	0.814463	0.920336	-5.96683	0.0891284	0.0891284
												ANXA13	-0.057423	-0.135417	0.0205711	6.93382	-1.45328	0.147975	0.399461	-5.00208	0.829813	-0.829813
												ANXA2	0.591004	0.220647	0.96136	11.6134	3.14989	0.00192752	0.0469364	-1.44638	2.715	2.715
												ANXA2P1	0.0295525	-0.0712873	0.130392	6.11906	0.578479	0.5637	0.777734	-5.83506	0.248952	0.248952
												ANXA2P2	0.433951	0.161484	0.706419	10.6669	3.14378	0.00196597	0.04755	-1.46349	2.70642	2.70642
												ANXA2P3	0.0524592	-0.0411182	0.146037	6.8682	1.10656	0.270034	0.544449	-5.41689	0.568582	0.568582
												ANXA2R	0.192985	0.00859803	0.377373	7.88684	2.06594	0.0403383	0.212096	-4.00369	1.39428	1.39428
												ANXA3	-0.028278	-0.270983	0.214427	4.82503	-0.229982	0.81838	0.922074	-5.96794	0.0870452	-0.0870452
												ANXA4	0.312583	0.111022	0.514143	9.04911	3.06115	0.00256029	0.0539792	-1.69193	2.59171	2.59171
												ANXA5	0.39585	0.193007	0.598693	11.6456	3.85208	0.000165255	0.015895	0.709528	3.78185	3.78185
												ANXA6	-0.0273044	-0.168419	0.113811	10.1934	-0.381931	0.702986	0.860777	-5.92406	0.153054	-0.153054
												ANXA7	-0.179941	-0.305244	-0.0546383	10.1324	-2.83462	0.00513963	0.0755681	-2.29026	2.28907	-2.28907
												ANXA8	-0.000567715	-0.0650586	0.0639232	7.90796	-0.0173763	0.986157	0.994391	-5.99277	0.0060541	-0.0060541
												ANXA8L1	-0.000567715	-0.0650586	0.0639232	7.90796	-0.0173763	0.986157	0.994391	-5.99277	0.0060541	-0.0060541
												ANXA9	-0.0645164	-0.131198	0.00216558	6.20808	-1.9098	0.0578296	0.253635	-4.28982	1.23785	-1.23785
												AOAH	0.0329465	-0.104427	0.17032	7.16876	0.473402	0.636529	0.824721	-5.88716	0.196182	0.196182
												AOC1	0.0235619	-0.0250993	0.0722231	5.59954	0.955769	0.340535	0.608043	-5.56277	0.467838	0.467838
												AOC2	-0.0895654	-0.153408	-0.0257232	6.31609	-2.76922	0.00623801	0.0820779	-2.45527	2.20495	-2.20495
												AOC3	-0.0437175	-0.170466	0.0830311	5.85553	-0.680829	0.496899	0.730318	-5.77434	0.303732	-0.303732
												AOC4P	-0.0423766	-0.106938	0.022185	6.97873	-1.29562	0.196849	0.459585	-5.20435	0.705867	-0.705867
												AOX1	0.0165477	-0.103763	0.136859	6.83625	0.271493	0.786339	0.906821	-5.95811	0.10439	0.10439
												AOX3P	-0.0259795	-0.0795705	0.0276114	5.58085	-0.956896	0.339967	0.607264	-5.56176	0.468563	-0.468563
												AP1AR	-0.146297	-0.329507	0.0369126	7.87887	-1.5762	0.116822	0.354029	-4.8287	0.932474	-0.932474
												AP1B1	-0.027898	-0.128481	0.0726853	9.33798	-0.547485	0.584758	0.791666	-5.8515	0.233024	-0.233024
												AP1G1	-0.0147216	-0.105398	0.0759547	9.35601	-0.32047	0.749003	0.887832	-5.94443	0.125517	-0.125517
												AP1G2	-0.0655282	-0.214037	0.0829806	7.98038	-0.870966	0.384991	0.647536	-5.63555	0.41455	-0.41455
												AP1M1	0.159639	0.0442563	0.275022	10.1189	2.73101	0.00697452	0.0863829	-2.55006	2.15649	2.15649
												AP1M2	-0.0235134	-0.0788242	0.0317973	7.35292	-0.839136	0.402562	0.661351	-5.66113	0.395167	-0.395167
												AP1S1	0.051773	-0.0839634	0.187509	9.5854	0.752891	0.452548	0.700529	-5.72571	0.344335	0.344335
												AP1S2	0.065253	-0.117503	0.248009	10.8663	0.704781	0.481903	0.720679	-5.75872	0.31704	0.31704
												AP1S3	0.0473695	-0.0100075	0.104746	4.69647	1.62962	0.105018	0.335697	-4.74911	0.978736	0.978736
												AP2A1	0.023079	-0.0917829	0.137941	8.54621	0.396612	0.692147	0.854533	-5.91867	0.159802	0.159802
												AP2A2	0.0583532	-0.0448507	0.161557	9.98679	1.11608	0.265952	0.540432	-5.40698	0.575197	0.575197
												AP2B1	-0.103564	-0.222747	0.0156184	10.7811	-1.71523	0.0881103	0.309581	-4.6162	1.05497	-1.05497
												AP2M1	0.0827833	-0.0254348	0.191001	11.4839	1.50997	0.132892	0.377992	-4.92382	0.8765	0.8765
												AP2S1	0.162278	0.01688	0.307676	10.7768	2.20306	0.0289241	0.17779	-3.73489	1.53874	1.53874
												AP3B1	0.0885467	-0.0050942	0.182188	9.55439	1.86652	0.0636771	0.264565	-4.36532	1.19602	1.19602
												AP3B2	-0.248591	-0.506287	0.00910569	7.83622	-1.90415	0.0585655	0.255354	-4.29976	1.23236	-1.23236
												AP3D1	0.0660032	-0.0159976	0.148004	10.8542	1.58881	0.113946	0.349609	-4.81015	0.943301	0.943301
												AP3M1	-0.0959004	-0.236413	0.0446124	9.00939	-1.34719	0.179696	0.439302	-5.14068	0.745461	-0.745461
												AP3M2	-0.0712789	-0.221328	0.0787696	9.09418	-0.93768	0.349728	0.616312	-5.57886	0.456269	-0.456269
												AP3S1	0.0813003	-0.0128429	0.175444	10.8612	1.70462	0.0900767	0.312186	-4.63302	1.04539	1.04539
												AP3S2	-0.0643699	-0.150881	0.0221407	9.98075	-1.46872	0.143742	0.393262	-4.98106	0.842417	-0.842417
												AP4B1	0.0590679	-0.0464841	0.16462	8.51182	1.10461	0.270875	0.545409	-5.41891	0.567231	0.567231
												AP4E1	0.0342303	-0.0808641	0.149325	7.59188	0.587059	0.557936	0.774398	-5.83034	0.253415	0.253415
												AP4M1	0.280515	0.164332	0.396698	8.04515	4.76584	3.99363e-06	0.00420491	4.0391	5.39863	5.39863
												AP4S1	-0.154886	-0.270076	-0.039696	8.40797	-2.65413	0.00869959	0.0960346	-2.73713	2.0605	-2.0605
												AP5B1	0.0512902	-0.0438242	0.146405	6.30103	1.06442	0.288635	0.561494	-5.45978	0.539651	0.539651
												AP5M1	-0.0580567	-0.172912	0.0567987	9.54084	-0.99776	0.319802	0.589755	-5.52427	0.495119	-0.495119
												AP5S1	0.0889625	-0.0068194	0.184744	8.46986	1.83336	0.0684829	0.274148	-4.42204	1.16442	1.16442
												AP5Z1	0.111606	0.0173442	0.205869	8.21726	2.3371	0.0205898	0.148233	-3.45644	1.68635	1.68635
												APAF1	0.0586487	-0.0141498	0.131447	7.38365	1.59023	0.113625	0.349212	-4.80805	0.944527	0.944527
												APBA1	-0.328345	-0.593662	-0.0630288	8.21127	-2.44282	0.0155875	0.128021	-3.22598	1.80722	-1.80722
												APBA2	-0.391661	-0.612668	-0.170655	10.3499	-3.4981	0.000596973	0.0272328	-0.423688	3.22404	-3.22404
												APBA3	0.18075	0.0674429	0.294058	8.36484	3.14881	0.00193429	0.0470479	-1.44941	2.71348	2.71348
												APBB1	-0.140117	-0.300414	0.0201805	8.31897	-1.7254	0.0862582	0.306713	-4.59998	1.0642	-1.0642
												APBB1IP	0.209294	-0.0570566	0.475645	10.0441	1.55106	0.122732	0.363451	-4.86528	0.911043	0.911043
												APBB2	-0.232113	-0.434373	-0.0298535	9.57638	-2.26525	0.0247492	0.164683	-3.60762	1.60644	-1.60644
												APBB3	-0.0153257	-0.131497	0.100846	8.69227	-0.260404	0.794865	0.910912	-5.9609	0.0997066	-0.0997066
												APC	-0.187499	-0.371992	-0.00300506	9.86705	-2.00605	0.0464233	0.22721	-4.11597	1.33326	-1.33326
												APC2	-0.142303	-0.365684	0.0810787	10.2633	-1.25745	0.210301	0.475816	-5.24991	0.67716	-0.67716
												APCDD1	-0.123678	-0.346156	0.0988005	9.93544	-1.09731	0.274045	0.548192	-5.42645	0.562178	-0.562178
												APCDD1L	0.121017	0.0179657	0.224068	6.91723	2.31802	0.0216292	0.152753	-3.497	1.66496	1.66496
												APCDD1L-DT	-0.00698038	-0.0692344	0.0552736	8.94751	-0.221328	0.8251	0.925334	-5.96978	0.0834933	-0.0834933
												APCS	-0.0214548	-0.0666127	0.023703	5.74455	-0.937815	0.349659	0.61624	-5.57874	0.456355	-0.456355
												APEH	0.198952	0.0752054	0.322699	9.00393	3.17351	0.00178542	0.0456455	-1.37998	2.74826	2.74826
												APELA	0.085469	-0.022264	0.193202	4.111	1.56598	0.119199	0.357463	-4.84365	0.923729	0.923729
												APEX1	-0.0166861	-0.138351	0.104979	11.2609	-0.270717	0.786934	0.906974	-5.95831	0.104062	-0.104062
												APEX2	0.120461	0.0360117	0.204911	8.31617	2.81563	0.00543888	0.0772865	-2.33854	2.26449	2.26449
												APH1A	0.171456	0.0253497	0.317561	10.2764	2.31638	0.0217211	0.153201	-3.50049	1.66312	1.66312
												APH1B	-0.0860884	-0.195076	0.0228988	8.61224	-1.55917	0.1208	0.359867	-4.85354	0.917934	-0.917934
												API5	0.0493324	-0.0423288	0.140994	9.60531	1.06236	0.289567	0.562412	-5.46183	0.538251	0.538251
												API5P1	0.0163338	-0.0996797	0.132347	8.05	0.277909	0.781417	0.904051	-5.95645	0.107117	0.107117
												APIP	0.00302699	-0.120338	0.126392	8.83948	0.0484334	0.961427	0.983383	-5.9918	0.0170836	0.0170836
												APLF	0.00779283	-0.0567776	0.0723632	6.36717	0.238225	0.811991	0.918939	-5.96612	0.0904486	0.0904486
												APLN	0.162112	-0.0495921	0.373816	8.87714	1.51151	0.1325	0.377224	-4.92165	0.877784	0.877784
												APLNR	-0.207869	-0.55974	0.144003	10.2207	-1.16609	0.2452	0.517671	-5.35352	0.61048	-0.61048
												APLP1	-0.0872762	-0.400399	0.225847	10.5522	-0.550182	0.582911	0.790245	-5.85011	0.234398	-0.234398
												APLP2	0.132627	0.0278723	0.237381	11.9415	2.4991	0.0133918	0.118679	-3.09944	1.87316	1.87316
												APMAP	0.128429	0.0304104	0.226448	11.2155	2.5863	0.0105316	0.104761	-2.89812	1.97751	1.97751
												APOA1	-0.0236555	-0.0900967	0.0427857	5.8416	-0.70278	0.483146	0.721522	-5.76005	0.315922	-0.315922
												APOA2	0.00551642	-0.0341737	0.0452066	5.19424	0.274346	0.784149	0.905767	-5.95738	0.105602	0.105602
												APOA4	-0.016486	-0.0951146	0.0621427	6.80997	-0.413865	0.67949	0.848899	-5.91207	0.167817	-0.167817
												APOA5	-0.0186324	-0.0738307	0.036566	8.26087	-0.666296	0.506118	0.737509	-5.78356	0.295749	-0.295749
												APOB	0.0202286	-0.0696898	0.110147	5.32597	0.44406	0.657559	0.837555	-5.89985	0.182065	0.182065
												APOBEC1	-0.0223741	-0.0767408	0.0319926	5.92266	-0.812341	0.417723	0.673147	-5.68194	0.379112	-0.379112
												APOBEC2	-0.0178641	-0.0946536	0.0589254	6.79913	-0.459202	0.646671	0.831183	-5.8934	0.189317	-0.189317
												APOBEC3A	0.214381	-0.0494675	0.478229	5.87184	1.60382	0.110594	0.344304	-4.78787	0.956269	0.956269
												APOBEC3B	0.214381	-0.0494675	0.478229	5.87184	1.60382	0.110594	0.344304	-4.78787	0.956269	0.956269
												APOBEC3C	0.146535	0.0215701	0.2715	7.0898	2.31461	0.0218199	0.153646	-3.50422	1.66115	1.66115
												APOBEC3D	0.0020522	-0.0507278	0.0548322	6.69347	0.0767493	0.938912	0.973885	-5.99013	0.0273749	0.0273749
												APOBEC3F	0.176379	0.0369891	0.315769	6.77544	2.4977	0.0134429	0.118887	-3.10262	1.87151	1.87151
												APOBEC3G	0.030651	-0.0675889	0.128891	8.17888	0.61586	0.538804	0.761193	-5.81402	0.268569	0.268569
												APOBEC4	-0.048072	-0.12158	0.0254357	6.30042	-1.29088	0.198485	0.460906	-5.21009	0.702272	-0.702272
												APOBR	0.123757	0.0430343	0.20448	7.05793	3.02621	0.00285826	0.057075	-1.7869	2.5439	2.5439
												APOC1	0.0291064	-0.192515	0.250728	10.5308	0.25924	0.795761	0.911146	-5.96118	0.0992175	0.0992175
												APOC1P1	0.00364414	-0.197163	0.204451	10.4286	0.0358213	0.971467	0.988352	-5.9923	0.0125722	0.0125722
												APOC2	0.243315	0.0324939	0.454136	9.93327	2.27814	0.023953	0.161837	-3.58082	1.62064	1.62064
												APOC3	0.00470188	-0.0520626	0.0614663	5.79679	0.163501	0.870317	0.943088	-5.98029	0.0603226	0.0603226
												APOC4	-0.0285051	-0.102135	0.0451243	6.93856	-0.764181	0.44581	0.695903	-5.71765	0.35085	-0.35085
												APOC4-APOC2	0.243315	0.0324939	0.454136	9.93327	2.27814	0.023953	0.161837	-3.58082	1.62064	1.62064
												APOD	-0.131252	-0.623906	0.361402	10.873	-0.525884	0.599648	0.801642	-5.86243	0.222103	-0.222103
												APOE	-0.115118	-0.363506	0.13327	12.2701	-0.914825	0.361568	0.625904	-5.59874	0.44181	-0.44181
												APOF	0.026446	-0.0124624	0.0653544	4.50764	1.34166	0.181481	0.441819	-5.14763	0.741169	0.741169
												APOH	-0.0201231	-0.0929646	0.0527185	5.84508	-0.545306	0.586252	0.792792	-5.85263	0.231916	-0.231916
												APOL1	0.0363359	-0.112073	0.184745	8.06915	0.483283	0.629511	0.821464	-5.8827	0.200996	0.200996
												APOL2	-0.125581	-0.257288	0.00612501	8.71874	-1.8821	0.0615167	0.260837	-4.33832	1.21101	-1.21101
												APOL3	-0.0359803	-0.183064	0.111103	7.31637	-0.482865	0.629808	0.821601	-5.88289	0.200792	-0.200792
												APOL4	0.058239	-0.12091	0.237388	7.01649	0.641691	0.521931	0.749856	-5.79872	0.282387	0.282387
												APOL5	0.00930399	-0.0530367	0.0716447	6.45456	0.294593	0.768661	0.898908	-5.95194	0.114265	0.114265
												APOL6	0.0510909	-0.0777364	0.179918	8.27851	0.782818	0.434814	0.687197	-5.70409	0.361696	0.361696
												APOLD1	0.110373	-0.0234605	0.244207	10.4361	1.62788	0.105386	0.335875	-4.75174	0.977217	0.977217
												APOM	0.0511131	-0.0417573	0.143983	7.55719	1.08638	0.278838	0.552949	-5.43764	0.554648	0.554648
												APOO	-0.00487109	-0.132524	0.122782	9.1895	-0.0753218	0.940047	0.974398	-5.99023	0.0268506	-0.0268506
												APOOL	-0.0598374	-0.235788	0.116113	8.7682	-0.671285	0.502943	0.735485	-5.78042	0.298482	-0.298482
												APOPT1	0.0868434	-0.0201375	0.193824	7.77933	1.60234	0.110921	0.344344	-4.79007	0.954987	0.954987
												APP	0.0817542	-0.0636708	0.227179	12.081	1.10968	0.268693	0.543075	-5.41366	0.570744	0.570744
												APPBP2	-0.093465	-0.223173	0.0362429	9.7596	-1.42235	0.156741	0.410964	-5.04354	0.804818	-0.804818
												APPL1	0.00202369	-0.114214	0.118262	8.70068	0.0343654	0.972626	0.988748	-5.99235	0.0120542	0.0120542
												APPL2	0.012968	-0.18676	0.212696	9.1146	0.128162	0.898171	0.955398	-5.98515	0.0466411	0.0466411
												APRT	0.0482146	-0.0844784	0.180908	8.91548	0.717226	0.474211	0.715739	-5.75039	0.324028	0.324028
												APTR	0.282944	0.144355	0.421533	7.70092	4.02993	8.37569e-05	0.0120197	1.31312	4.07698	4.07698
												APTX	0.00402756	-0.0829732	0.0910283	9.00102	0.0913786	0.927298	0.968721	-5.98897	0.0327805	0.0327805
												AQP1	0.256825	-0.218735	0.732386	11.0989	1.066	0.287923	0.560839	-5.4582	0.540724	0.540724
												AQP10	-0.014033	-0.051265	0.0231989	5.78314	-0.743978	0.457908	0.705427	-5.73199	0.339222	-0.339222
												AQP11	-0.0920814	-0.207635	0.0234721	7.27985	-1.57295	0.117575	0.354805	-4.83347	0.929684	-0.929684
												AQP12A	0.0066439	-0.0448611	0.0581489	9.69639	0.254624	0.799319	0.912793	-5.9623	0.0972799	0.0972799
												AQP12B	0.0066439	-0.0448611	0.0581489	9.69639	0.254624	0.799319	0.912793	-5.9623	0.0972799	0.0972799
												AQP2	-0.017928	-0.0660217	0.0301657	8.33865	-0.735815	0.462849	0.70821	-5.73768	0.334561	-0.334561
												AQP3	-0.0344452	-0.0871934	0.0183031	7.66277	-1.28898	0.199142	0.461834	-5.21237	0.700836	-0.700836
												AQP4	-0.0505674	-0.337608	0.236473	12.3963	-0.347738	0.728463	0.875148	-5.93583	0.137592	-0.137592
												AQP4-AS1	-0.210797	-0.395101	-0.0264938	5.90263	-2.25765	0.0252293	0.166081	-3.62335	1.5981	-1.5981
												AQP5	0.0518964	-0.0151452	0.118938	6.60625	1.52798	0.12836	0.371133	-4.89835	0.891569	0.891569
												AQP6	-0.11193	-0.199374	-0.0244865	8.29502	-2.52664	0.0124213	0.113709	-3.03655	1.90583	-1.90583
												AQP7	-0.0336026	-0.11185	0.0446444	7.39391	-0.847677	0.3978	0.657266	-5.65436	0.400335	-0.400335
												AQP7P1	-0.0336026	-0.11185	0.0446444	7.39391	-0.847677	0.3978	0.657266	-5.65436	0.400335	-0.400335
												AQP7P3	-0.0336026	-0.11185	0.0446444	7.39391	-0.847677	0.3978	0.657266	-5.65436	0.400335	-0.400335
												AQP7P4	-0.0336026	-0.11185	0.0446444	7.39391	-0.847677	0.3978	0.657266	-5.65436	0.400335	-0.400335
												AQP7P5	-0.0336026	-0.11185	0.0446444	7.39391	-0.847677	0.3978	0.657266	-5.65436	0.400335	-0.400335
												AQP8	-0.014022	-0.0667552	0.0387112	5.86518	-0.52487	0.600352	0.802134	-5.86293	0.221594	-0.221594
												AQP9	0.136945	-0.0821153	0.356005	7.56647	1.23398	0.2189	0.486782	-5.27726	0.659754	0.659754
												AQR	0.0675893	-0.0340981	0.169277	9.16494	1.31201	0.191272	0.452503	-5.18439	0.718348	0.718348
												AR	0.107046	-0.151588	0.365679	8.50249	0.816976	0.415076	0.671193	-5.67839	0.381872	0.381872
												ARAF	0.124045	0.0112053	0.236885	9.28423	2.16991	0.0313897	0.186863	-3.80136	1.50321	1.50321
												ARAP1	0.0370299	-0.0696578	0.143718	9.051	0.685116	0.494196	0.727887	-5.77159	0.3061	0.3061
												ARAP2	0.00499941	-0.240118	0.250117	9.58054	0.0402596	0.967933	0.986879	-5.99214	0.0141547	0.0141547
												ARAP3	0.515452	0.271196	0.759709	8.88626	4.16551	4.9151e-05	0.0107962	1.78811	4.30847	4.30847
												ARC	-0.0473959	-0.4054	0.310608	8.52169	-0.261323	0.794157	0.910423	-5.96067	0.100094	-0.100094
												ARCN1	0.104668	0.00104551	0.208291	10.7854	1.99382	0.047758	0.231176	-4.13852	1.32095	1.32095
												AREG	0.0855952	-0.15499	0.32618	5.01733	0.702273	0.483461	0.721755	-5.76038	0.315638	0.315638
												AREL1	0.0148834	-0.129733	0.1595	8.63724	0.203147	0.839261	0.930906	-5.97342	0.0761029	0.0761029
												ARF1	0.0786954	-0.00107333	0.158464	11.9562	1.94734	0.0531279	0.242912	-4.22298	1.27468	1.27468
												ARF1P1	-0.0213877	-0.0786579	0.0358826	7.17494	-0.737157	0.462035	0.70821	-5.73675	0.335325	-0.335325
												ARF3	-0.0724859	-0.205458	0.0604862	11.1462	-1.07601	0.283433	0.556501	-5.44814	0.54755	-0.54755
												ARF4	0.272553	0.128643	0.416463	12.0136	3.7384	0.000252133	0.0189109	0.335588	3.59837	3.59837
												ARF5	0.179536	0.0753135	0.283759	10.2298	3.40028	0.000837489	0.0315577	-0.720367	3.07702	3.07702
												ARF6	0.116074	-0.0129226	0.245071	9.58666	1.77616	0.0774808	0.290661	-4.51761	1.11081	1.11081
												ARFGAP1	0.0643626	-0.0361095	0.164835	9.08526	1.26448	0.207773	0.472832	-5.24161	0.682411	0.682411
												ARFGAP2	-0.00378465	-0.0978067	0.0902374	9.56446	-0.079455	0.936763	0.973612	-5.98993	0.0283701	-0.0283701
												ARFGAP3	-0.0602987	-0.203225	0.0826271	9.38177	-0.832765	0.406136	0.664171	-5.66614	0.391329	-0.391329
												ARFGEF1	-0.0222966	-0.128912	0.0843192	9.12474	-0.412802	0.680267	0.848899	-5.91249	0.16732	-0.16732
												ARFGEF2	-0.0759443	-0.207485	0.0555967	8.85564	-1.13962	0.256036	0.530097	-5.3821	0.5917	-0.5917
												ARFGEF3	-0.567634	-0.909088	-0.22618	8.77174	-3.28142	0.00125147	0.0379109	-1.07106	2.90258	-2.90258
												ARFIP1	0.143604	0.0209438	0.266265	8.88716	2.31094	0.0220271	0.154599	-3.512	1.65704	1.65704
												ARFIP2	0.0714805	-0.0143295	0.157291	9.71953	1.64428	0.101952	0.330566	-4.72682	0.991605	0.991605
												ARFRP1	0.0408985	-0.0357257	0.117523	8.70392	1.05358	0.293559	0.565992	-5.47055	0.532304	0.532304
												ARG1	-0.0373875	-0.119764	0.0449887	5.19216	-0.89588	0.371573	0.635254	-5.61486	0.429955	-0.429955
												ARG2	0.0292443	-0.113615	0.172104	7.04172	0.404071	0.686664	0.852577	-5.91585	0.163256	0.163256
												ARGLU1	0.135672	0.000990538	0.270353	11.3084	1.98842	0.0483571	0.23228	-4.14843	1.31554	1.31554
												ARHGAP1	0.0252475	-0.0767855	0.12728	11.3347	0.48843	0.625869	0.818945	-5.88034	0.203516	0.203516
												ARHGAP10	0.0324669	-0.057421	0.122355	7.32011	0.71296	0.47684	0.717624	-5.75326	0.321627	0.321627
												ARHGAP11A	0.0783691	-0.042692	0.19943	4.68752	1.27781	0.203045	0.46716	-5.22578	0.692408	0.692408
												ARHGAP12	-0.277645	-0.463991	-0.0912989	9.0134	-2.941	0.00372377	0.0645393	-2.01442	2.42902	-2.42902
												ARHGAP15	0.0258779	-0.157042	0.208798	7.72041	0.27925	0.78039	0.903716	-5.9561	0.107688	0.107688
												ARHGAP17	0.0254074	-0.0624776	0.113292	9.37138	0.570651	0.568984	0.781423	-5.8393	0.2449	0.2449
												ARHGAP18	0.242398	-0.0280882	0.512884	8.35554	1.76892	0.0786851	0.292505	-4.52949	1.10411	1.10411
												ARHGAP19	0.00942061	-0.136231	0.155072	8.16228	0.12767	0.898559	0.955633	-5.98521	0.0464532	0.0464532
												ARHGAP19-SLIT1	-0.0843076	-0.148131	-0.0204844	6.52692	-2.60743	0.00992682	0.102111	-2.84838	2.00319	-2.00319
												ARHGAP20	-0.0715009	-0.274349	0.131347	7.79485	-0.69577	0.487515	0.724591	-5.76466	0.312012	-0.312012
												ARHGAP21	-0.104522	-0.264794	0.0557507	11.0861	-1.28728	0.199732	0.462784	-5.21442	0.699551	-0.699551
												ARHGAP22	-0.183443	-0.374315	0.00742798	7.70867	-1.89708	0.0594985	0.256872	-4.31217	1.22549	-1.22549
												ARHGAP22-IT1	-0.0133158	-0.0692911	0.0426596	6.9333	-0.469564	0.639263	0.826531	-5.88886	0.19432	-0.19432
												ARHGAP23	-0.152843	-0.323299	0.0176122	9.31795	-1.76995	0.0785136	0.292352	-4.52781	1.10505	-1.10505
												ARHGAP24	-0.252576	-0.445229	-0.0599235	8.09917	-2.58787	0.0104856	0.104352	-2.89444	1.97941	-1.97941
												ARHGAP25	0.0999556	-0.0225128	0.222424	7.81838	1.61105	0.109009	0.341807	-4.77707	0.962537	0.962537
												ARHGAP26	0.0268491	-0.1881	0.241798	8.37047	0.246558	0.805546	0.915688	-5.96421	0.0939099	0.0939099
												ARHGAP26-AS1	0.0140587	-0.0444582	0.0725757	5.64071	0.474231	0.635939	0.824535	-5.88679	0.196584	0.196584
												ARHGAP27	0.0529134	-0.0453871	0.151214	7.9625	1.06252	0.289496	0.562326	-5.46168	0.538357	0.538357
												ARHGAP27P1-BPTFP1-KPNA2P3	0.179631	0.00906829	0.350194	11.1707	2.07885	0.0391207	0.209341	-3.9791	1.40759	1.40759
												ARHGAP28	-0.00925683	-0.118636	0.100122	6.20654	-0.167053	0.867525	0.942313	-5.97973	0.0617178	-0.0617178
												ARHGAP29	0.317739	0.0518662	0.583613	8.83696	2.35897	0.0194523	0.144092	-3.40955	1.71103	1.71103
												ARHGAP30	0.0838003	-0.0818017	0.249402	7.75817	0.998861	0.31927	0.589602	-5.52323	0.495842	0.495842
												ARHGAP31	-0.227634	-0.382086	-0.0731814	8.30804	-2.90916	0.00410463	0.067089	-2.09794	2.38673	-2.38673
												ARHGAP32	-0.217647	-0.420887	-0.0144066	8.19547	-2.11382	0.0359776	0.199962	-3.91169	1.44397	-1.44397
												ARHGAP33	-0.0371117	-0.188345	0.114121	8.99148	-0.484384	0.628732	0.8213	-5.8822	0.201534	-0.201534
												ARHGAP35	-0.0952589	-0.250429	0.0599116	10.7715	-1.21177	0.227267	0.496665	-5.30267	0.643464	-0.643464
												ARHGAP36	-0.70572	-1.08778	-0.323656	5.82018	-3.64604	0.000352927	0.0221876	0.0387134	3.45232	-3.45232
												ARHGAP39	-0.0275856	-0.149994	0.0948226	7.95016	-0.444833	0.657002	0.837337	-5.89953	0.182434	-0.182434
												ARHGAP4	0.0782978	-0.0356742	0.19227	7.4135	1.35605	0.176866	0.43536	-5.1295	0.752355	0.752355
												ARHGAP42	-0.127655	-0.367679	0.112369	7.72511	-1.0498	0.295286	0.567023	-5.47427	0.529757	-0.529757
												ARHGAP44	-0.230937	-0.463026	0.00115122	7.43969	-1.96411	0.0511345	0.238727	-4.19272	1.29129	-1.29129
												ARHGAP45	0.109684	-0.0512919	0.270659	8.30632	1.34495	0.180417	0.440424	-5.1435	0.743723	0.743723
												ARHGAP5	-0.13796	-0.307656	0.0317355	9.72271	-1.60475	0.110389	0.344232	-4.78648	0.957074	-0.957074
												ARHGAP5-AS1	-0.152782	-0.281536	-0.0240281	7.32931	-2.34227	0.0203156	0.147243	-3.44539	1.69217	-1.69217
												ARHGAP6	0.0785693	-0.21198	0.369118	7.48426	0.533775	0.594189	0.797762	-5.85849	0.226076	0.226076
												ARHGAP8	-0.0483737	-0.124584	0.027837	5.80814	-1.25291	0.211946	0.477584	-5.25524	0.673774	-0.673774
												ARHGAP9	0.104284	-0.0493573	0.257926	8.42309	1.33979	0.182088	0.442596	-5.14998	0.739718	0.739718
												ARHGDIA	0.100262	-0.0262388	0.226764	10.6563	1.56448	0.11955	0.358015	-4.84584	0.922449	0.922449
												ARHGDIB	0.154564	-0.0567381	0.365866	10.3711	1.44388	0.150599	0.402908	-5.01478	0.822177	0.822177
												ARHGDIG	-0.179481	-0.376505	0.0175428	7.39352	-1.79815	0.0739136	0.284017	-4.48122	1.13128	-1.13128
												ARHGEF1	-0.0221018	-0.113836	0.0696324	9.07948	-0.475577	0.634981	0.824493	-5.88618	0.197239	-0.197239
												ARHGEF10	0.0225239	-0.137502	0.18255	9.11887	0.277829	0.781479	0.904074	-5.95647	0.107083	0.107083
												ARHGEF10L	-0.0250831	-0.152237	0.102071	8.81943	-0.389383	0.697476	0.857494	-5.92135	0.156471	-0.156471
												ARHGEF11	-0.0205341	-0.104317	0.0632492	8.48378	-0.483775	0.629163	0.821406	-5.88248	0.201237	-0.201237
												ARHGEF12	-0.0261379	-0.130757	0.0784816	10.9851	-0.493155	0.622534	0.816716	-5.87816	0.205837	-0.205837
												ARHGEF15	-0.032265	-0.109976	0.0454456	7.19098	-0.819553	0.413609	0.669768	-5.67641	0.38341	-0.38341
												ARHGEF16	-0.00477705	-0.0719701	0.062416	7.21366	-0.140333	0.888562	0.951648	-5.98361	0.0513125	-0.0513125
												ARHGEF17	-0.0419465	-0.1411	0.0572069	9.48131	-0.835052	0.404851	0.663474	-5.66435	0.392705	-0.392705
												ARHGEF18	0.0556314	-0.0333264	0.144589	9.94373	1.23441	0.218738	0.486673	-5.27676	0.660075	0.660075
												ARHGEF19	0.0257285	-0.054916	0.106373	7.44453	0.629746	0.529699	0.754314	-5.80587	0.275971	0.275971
												ARHGEF2	-0.0336106	-0.140154	0.0729327	10.8575	-0.622695	0.534312	0.757832	-5.81003	0.272205	-0.272205
												ARHGEF25	-0.0573139	-0.234009	0.119381	8.24054	-0.640268	0.522854	0.750359	-5.79958	0.28162	-0.28162
												ARHGEF26	0.07125	-0.169247	0.311747	10.0183	0.584792	0.559457	0.775026	-5.8316	0.252234	0.252234
												ARHGEF26-AS1	-0.129285	-0.422771	0.164201	6.83581	-0.869535	0.385771	0.647916	-5.63672	0.413671	-0.413671
												ARHGEF28	0.0393442	-0.0518958	0.130584	8.13243	0.851179	0.395858	0.656294	-5.65156	0.402461	0.402461
												ARHGEF3	0.12947	-0.0510492	0.309989	9.71813	1.4157	0.158678	0.413193	-5.05235	0.799483	0.799483
												ARHGEF37	-0.0233337	-0.265582	0.218915	8.33985	-0.190129	0.849433	0.934811	-5.97584	0.0708707	-0.0708707
												ARHGEF38	0.0157377	-0.0546948	0.0861703	6.38992	0.441056	0.659728	0.839005	-5.90111	0.180635	0.180635
												ARHGEF39	-0.04034	-0.116516	0.0358357	6.60196	-1.04531	0.297352	0.569308	-5.47869	0.526729	-0.526729
												ARHGEF4	-0.149694	-0.418643	0.119255	9.48775	-1.09865	0.273461	0.547968	-5.42507	0.563105	-0.563105
												ARHGEF40	0.0792361	-0.0800071	0.238479	9.35868	0.982172	0.3274	0.596395	-5.53875	0.484922	0.484922
												ARHGEF5	-0.0256868	-0.11999	0.0686164	7.64973	-0.537662	0.591508	0.796224	-5.85653	0.228039	-0.228039
												ARHGEF6	-0.0652067	-0.231955	0.101541	10.2204	-0.771892	0.441241	0.691912	-5.71208	0.355324	-0.355324
												ARHGEF7	-0.0576724	-0.21584	0.100495	10.5188	-0.71974	0.472665	0.714706	-5.74869	0.325446	-0.325446
												ARHGEF7-AS2	-0.0183333	-0.0722512	0.0355846	4.17613	-0.671172	0.503015	0.735491	-5.78049	0.298419	-0.298419
												ARHGEF7-IT1	-0.0410955	-0.0956688	0.0134777	5.03815	-1.48641	0.139007	0.386148	-4.95669	0.856964	-0.856964
												ARHGEF9	-0.22991	-0.449132	-0.0106885	9.54776	-2.07014	0.0399387	0.210923	-3.99571	1.39861	-1.39861
												ARID1A	0.0343921	-0.0922327	0.161017	10.6293	0.536124	0.592568	0.796778	-5.85731	0.227262	0.227262
												ARID1B	-0.0447683	-0.181403	0.0918661	9.06923	-0.646749	0.518659	0.74755	-5.79565	0.285118	-0.285118
												ARID2	-0.0698583	-0.198266	0.0585491	8.17992	-1.07387	0.284389	0.557283	-5.4503	0.546088	-0.546088
												ARID3A	0.0977407	-0.00990145	0.205383	7.55381	1.79233	0.0748436	0.28611	-4.49089	1.12585	1.12585
												ARID3B	-0.030115	-0.0979477	0.0377176	7.72549	-0.876334	0.382075	0.645201	-5.63114	0.417852	-0.417852
												ARID4A	-0.133653	-0.290226	0.022919	7.86373	-1.68496	0.0938158	0.318429	-4.66394	1.02772	-1.02772
												ARID4B	-0.0188046	-0.117686	0.0800769	10.0267	-0.375383	0.70784	0.863929	-5.9264	0.150065	-0.150065
												ARID5A	0.122156	-0.022342	0.266655	7.91349	1.6687	0.0970023	0.322884	-4.68925	1.01322	1.01322
												ARID5B	-0.00272386	-0.165988	0.16054	10.3133	-0.0329321	0.973767	0.989335	-5.9924	0.0115449	-0.0115449
												ARIH1	0.0345494	-0.0677429	0.136842	8.92531	0.666688	0.505868	0.737209	-5.78332	0.295963	0.295963
												ARIH2	0.218522	0.106034	0.331011	9.20404	3.83455	0.000176486	0.016446	0.65126	3.75329	3.75329
												ARIH2OS	0.090058	-0.0127553	0.192871	5.62315	1.72901	0.0856072	0.305772	-4.59419	1.06749	1.06749
												ARL1	0.0487601	-0.0801447	0.177665	9.35832	0.746657	0.456294	0.70425	-5.73011	0.340756	0.340756
												ARL10	-0.0352582	-0.202626	0.13211	9.15436	-0.415827	0.678057	0.8483	-5.9113	0.168734	-0.168734
												ARL11	0.0627302	-0.0519303	0.177391	4.59799	1.07991	0.281699	0.55484	-5.4442	0.550215	0.550215
												ARL13B	0.172411	-0.0153855	0.360208	8.42415	1.81219	0.0717074	0.280541	-4.45776	1.14444	1.14444
												ARL14	-0.0261672	-0.0590468	0.00671246	4.15928	-1.57092	0.118044	0.355626	-4.83643	0.927955	-0.927955
												ARL14EP	-0.00108055	-0.107357	0.105196	8.44358	-0.0200695	0.984011	0.993519	-5.99272	0.00699991	-0.00699991
												ARL15	-0.151769	-0.297157	-0.00638099	8.68814	-2.06053	0.0408585	0.213113	-4.01396	1.38872	-1.38872
												ARL16	0.0984446	-0.012567	0.209456	8.27087	1.75045	0.0818306	0.298861	-4.55962	1.08708	1.08708
												ARL17A	-0.122203	-0.224065	-0.0203405	7.70268	-2.36806	0.0189957	0.142721	-3.38993	1.72134	-1.72134
												ARL17B	-0.100688	-0.204234	0.00285699	7.72404	-1.91944	0.0565901	0.25127	-4.27277	1.24726	-1.24726
												ARL2	-0.112608	-0.220344	-0.00487257	9.47081	-2.06317	0.0406039	0.212662	-4.00895	1.39143	-1.39143
												ARL2-SNX15	-0.00933442	-0.0687741	0.0501053	7.85961	-0.309982	0.756951	0.891657	-5.94755	0.120932	-0.120932
												ARL2BP	0.10609	-0.0272983	0.239479	10.0662	1.56994	0.118274	0.355787	-4.83787	0.927111	0.927111
												ARL3	-0.205695	-0.344427	-0.0669622	9.00186	-2.92665	0.00389124	0.0654909	-2.05217	2.40991	-2.40991
												ARL4A	0.344541	0.116077	0.573006	9.7047	2.97679	0.00333451	0.0611403	-1.91957	2.47697	2.47697
												ARL4AP2	0.344541	0.116077	0.573006	9.7047	2.97679	0.00333451	0.0611403	-1.91957	2.47697	2.47697
												ARL4C	0.380213	0.101823	0.658603	10.5328	2.69587	0.00772046	0.0907154	-2.63618	2.11236	2.11236
												ARL4D	0.011906	-0.0968308	0.120643	8.25115	0.216129	0.829144	0.927067	-5.97085	0.0813701	0.0813701
												ARL5A	0.106019	-0.00704977	0.219088	10.5512	1.85083	0.0659151	0.269424	-4.39228	1.18101	1.18101
												ARL5B	-0.203584	-0.364087	-0.0430812	9.26604	-2.50372	0.0132244	0.117875	-3.08893	1.87862	-1.87862
												ARL5C	-0.0126174	-0.064382	0.0391472	6.77087	-0.48113	0.631038	0.822409	-5.88368	0.199944	-0.199944
												ARL6	-0.0280122	-0.226971	0.170946	7.47461	-0.277914	0.781413	0.904051	-5.95645	0.107119	-0.107119
												ARL6IP1	0.0891837	-0.00873639	0.187104	11.7916	1.79779	0.0739703	0.284184	-4.48182	1.13094	1.13094
												ARL6IP4	0.0613585	-0.0347661	0.157483	9.9192	1.25999	0.209387	0.474742	-5.24692	0.679049	0.679049
												ARL6IP5	0.0250567	-0.120276	0.17039	11.3194	0.340319	0.734033	0.878652	-5.93824	0.134284	0.134284
												ARL6IP6	0.159021	-0.0265751	0.344617	9.70185	1.69126	0.0926041	0.316193	-4.65407	1.03337	1.03337
												ARL8A	-0.0163708	-0.105188	0.0724462	9.64949	-0.36383	0.716433	0.868287	-5.93043	0.144824	-0.144824
												ARL8B	-0.0166322	-0.133552	0.100288	11.4906	-0.280794	0.779207	0.903003	-5.95569	0.108347	-0.108347
												ARL9	0.117497	0.00338632	0.231607	6.66201	2.03248	0.0436485	0.220403	-4.06682	1.36003	1.36003
												ARLNC1	-0.0145799	-0.0808487	0.051689	6.88061	-0.43428	0.664631	0.841085	-5.9039	0.177419	-0.177419
												ARMC1	-0.13864	-0.254424	-0.022857	10.0626	-2.36357	0.0192199	0.143357	-3.39962	1.71625	-1.71625
												ARMC10	0.175217	0.0668592	0.283574	9.38105	3.19184	0.00168187	0.044259	-1.32813	2.77421	2.77421
												ARMC10P1	0.175217	0.0668592	0.283574	9.38105	3.19184	0.00168187	0.044259	-1.32813	2.77421	2.77421
												ARMC12	0.0378089	-0.0793571	0.154975	6.57285	0.636968	0.524995	0.750916	-5.80156	0.279845	0.279845
												ARMC2	0.141719	-0.0192063	0.302644	5.41492	1.73832	0.0839507	0.302802	-4.57923	1.07598	1.07598
												ARMC3	0.0482892	-0.0675065	0.164085	4.7786	0.823157	0.411562	0.668116	-5.67362	0.385564	0.385564
												ARMC4	-0.0419105	-0.0891522	0.00533118	7.66188	-1.75115	0.0817093	0.298519	-4.55848	1.08773	-1.08773
												ARMC5	0.0107213	-0.0737829	0.0952255	7.89162	0.250435	0.802551	0.914281	-5.9633	0.0955272	0.0955272
												ARMC6	-0.0116426	-0.0925472	0.069262	8.07848	-0.284056	0.77671	0.902249	-5.95482	0.109741	-0.109741
												ARMC7	0.0619128	-0.000101649	0.123927	7.65279	1.97067	0.0503725	0.236906	-4.18083	1.29781	1.29781
												ARMC8	0.0311896	-0.0650126	0.127392	8.96625	0.639955	0.523056	0.750359	-5.79977	0.281452	0.281452
												ARMC9	0.218628	0.08732	0.349937	7.71404	3.28654	0.00123026	0.0375903	-1.05617	2.91	2.91
												ARMCX1	-0.0540316	-0.181541	0.0734779	9.86755	-0.836432	0.404077	0.662614	-5.66326	0.393536	-0.393536
												ARMCX2	0.275309	0.110348	0.440271	10.1837	3.29431	0.00119875	0.0372355	-1.03355	2.92127	2.92127
												ARMCX3	0.0497395	-0.061486	0.160965	10.3018	0.882719	0.378624	0.641346	-5.62586	0.421792	0.421792
												ARMCX4	-0.0873157	-0.179409	0.00477741	7.67013	-1.8715	0.0629793	0.263395	-4.35671	1.2008	-1.2008
												ARMCX5	-0.0250129	-0.191429	0.141404	7.57001	-0.296683	0.767068	0.897992	-5.95136	0.115166	-0.115166
												ARMCX5-GPRASP2	-0.0781063	-0.205067	0.0488546	7.08292	-1.21434	0.226287	0.495429	-5.29975	0.64534	-0.64534
												ARMCX6	0.0805524	-0.0602748	0.22138	10.7825	1.12906	0.26045	0.535068	-5.39332	0.584276	0.584276
												ARMCX7P	0.0805524	-0.0602748	0.22138	10.7825	1.12906	0.26045	0.535068	-5.39332	0.584276	0.584276
												ARMH1	0.0405149	-0.0689259	0.149956	6.17979	0.730737	0.465938	0.709369	-5.74118	0.331672	0.331672
												ARMH3	-0.139154	-0.224779	-0.0535287	8.3041	-3.20789	0.00159587	0.0430977	-1.28254	2.797	-2.797
												ARMH4	-0.0394576	-0.178853	0.0999382	6.30016	-0.558736	0.577071	0.786468	-5.84564	0.23877	-0.23877
												ARMT1	0.0762853	-0.113471	0.266041	8.40456	0.793543	0.428559	0.68347	-5.69614	0.36799	0.36799
												ARNT	0.0013919	-0.0815455	0.0843293	7.9229	0.033127	0.973612	0.989335	-5.99239	0.0116141	0.0116141
												ARNT2	-0.157327	-0.341392	0.0267381	10.1219	-1.68716	0.0933911	0.317605	-4.6605	1.0297	-1.0297
												ARNTL	0.139792	-0.00392192	0.283506	9.382	1.92003	0.0565142	0.2512	-4.27172	1.24784	1.24784
												ARNTL2	0.129506	0.00572519	0.253288	7.70744	2.0652	0.0404097	0.212118	-4.00511	1.39352	1.39352
												ARNTL2-AS1	0.0144951	-0.0116255	0.0406157	4.07995	1.09538	0.274888	0.548807	-5.42843	0.560844	0.560844
												ARPC1A	0.281584	0.143416	0.419752	11.045	4.02278	8.61152e-05	0.0120826	1.28841	4.06492	4.06492
												ARPC1B	0.384194	0.141932	0.626456	10.0684	3.13033	0.00205307	0.0482854	-1.50104	2.68759	2.68759
												ARPC2	0.11502	-0.00884375	0.238885	11.8191	1.83297	0.0685424	0.274148	-4.42272	1.16404	1.16404
												ARPC3	0.0915691	-0.0355605	0.218699	10.5856	1.42176	0.156912	0.411093	-5.04432	0.804345	0.804345
												ARPC4	0.12735	0.0323461	0.222353	10.1437	2.64596	0.00890398	0.0971942	-2.75673	2.05042	2.05042
												ARPC4-TTLL3	0.218032	0.0639504	0.372114	9.0827	2.79315	0.00581351	0.0791535	-2.39529	2.23556	2.23556
												ARPC5	0.0851226	-0.0671139	0.237359	11.476	1.1037	0.27127	0.545888	-5.41986	0.566598	0.566598
												ARPC5L	0.0129665	-0.10244	0.128373	10.1021	0.221778	0.824751	0.925334	-5.96969	0.0836772	0.0836772
												ARPIN	-0.084089	-0.192857	0.0246791	8.37813	-1.52603	0.128846	0.372164	-4.90112	0.88993	-0.88993
												ARPIN-AP3S2	-0.0643699	-0.150881	0.0221407	9.98075	-1.46872	0.143742	0.393262	-4.98106	0.842417	-0.842417
												ARPP19	-0.0580499	-0.183341	0.0672409	11.4819	-0.91455	0.361713	0.626053	-5.59898	0.441636	-0.441636
												ARPP21	-0.347593	-0.700794	0.00560937	7.1229	-1.94255	0.053709	0.244531	-4.23157	1.26995	-1.26995
												ARR3	-0.0262188	-0.0761793	0.0237417	7.24392	-1.03589	0.301715	0.573845	-5.48789	0.520403	-0.520403
												ARRB1	-0.235495	-0.453158	-0.0178316	8.66441	-2.13561	0.0341313	0.194944	-3.86916	1.46685	-1.46685
												ARRB2	0.077923	-0.0503731	0.206219	9.31267	1.19888	0.232227	0.502052	-5.31721	0.634086	0.634086
												ARRDC1	0.0330965	-0.0500976	0.116291	7.76412	0.785263	0.433384	0.686512	-5.70229	0.363127	0.363127
												ARRDC1-AS1	-0.0306105	-0.10689	0.0456691	7.54981	-0.792113	0.429389	0.684148	-5.6972	0.367149	-0.367149
												ARRDC2	0.0169795	-0.180546	0.214505	8.26963	0.169679	0.865463	0.941699	-5.97931	0.0627515	0.0627515
												ARRDC3	0.320526	0.0769743	0.564078	9.33345	2.59775	0.0102	0.103034	-2.87122	1.9914	1.9914
												ARRDC3-AS1	-0.0260577	-0.0872548	0.0351394	6.9232	-0.840486	0.401807	0.660759	-5.66007	0.395983	-0.395983
												ARRDC4	0.16425	-0.133399	0.4619	10.0849	1.08925	0.277574	0.551459	-5.43471	0.556621	0.556621
												ARSA	0.0619559	-0.0618719	0.185784	7.93484	0.98762	0.324731	0.593651	-5.53371	0.488476	0.488476
												ARSB	-0.0507792	-0.170858	0.0692999	6.46372	-0.834726	0.405034	0.663585	-5.6646	0.392508	-0.392508
												ARSD	0.41033	0.236499	0.584161	8.72641	4.65942	6.34092e-06	0.00454982	3.62308	5.19785	5.19785
												ARSE	0.15296	0.0164568	0.289462	6.47034	2.21187	0.0282975	0.175657	-3.71706	1.54825	1.54825
												ARSF	-0.0852337	-0.221548	0.0510806	7.76004	-1.23423	0.218808	0.48676	-5.27697	0.659938	-0.659938
												ARSG	0.0421689	-0.10835	0.192688	6.13909	0.553003	0.580982	0.789008	-5.84864	0.235837	0.235837
												ARSI	0.231403	0.0897209	0.373086	6.95977	3.22388	0.00151422	0.04195	-1.23691	2.81981	2.81981
												ARSJ	0.534771	0.146299	0.923242	6.99315	2.71727	0.00725796	0.0880293	-2.58384	2.13918	2.13918
												ARSK	0.00361525	-0.0539334	0.0611639	8.63424	0.124002	0.901459	0.956797	-5.98565	0.045054	0.045054
												ART1	-0.0590004	-0.127412	0.00941118	6.90427	-1.70236	0.0905013	0.312852	-4.6366	1.04334	-1.04334
												ART3	-0.0784093	-0.272434	0.115616	6.19918	-0.797692	0.426153	0.680921	-5.69303	0.370435	-0.370435
												ART4	-0.0784639	-0.148288	-0.0086402	5.1095	-2.21816	0.0278581	0.174323	-3.7043	1.55505	-1.55505
												ART5	0.0051964	-0.0553071	0.0656999	7.55599	0.16953	0.86558	0.941699	-5.97934	0.062693	0.062693
												ARTN	-0.0611311	-0.137454	0.015192	7.6572	-1.581	0.115722	0.3524	-4.82166	0.936585	-0.936585
												ARV1	-0.0870332	-0.180025	0.00595862	9.35528	-1.84742	0.06641	0.269969	-4.39811	1.17777	-1.17777
												ARVCF	-0.0562286	-0.142172	0.0297143	8.67925	-1.29143	0.198292	0.460723	-5.20941	0.702695	-0.702695
												ARX	0.309134	-0.0820118	0.700279	8.1283	1.56003	0.120597	0.359563	-4.85229	0.918664	0.918664
												AS3MT	0.0415314	-0.0860828	0.169146	6.69302	0.642396	0.521474	0.7495	-5.79829	0.282767	0.282767
												ASAH1	-0.050468	-0.188716	0.0877799	11.9044	-0.720581	0.472149	0.714279	-5.74812	0.325921	-0.325921
												ASAH2	-0.204542	-0.352077	-0.0570069	6.79573	-2.73661	0.00686193	0.0857119	-2.53625	2.16355	-2.16355
												ASAH2B	-0.204542	-0.352077	-0.0570069	6.79573	-2.73661	0.00686193	0.0857119	-2.53625	2.16355	-2.16355
												ASAP1	-0.0377333	-0.166721	0.0912546	10.7599	-0.577432	0.564405	0.778158	-5.83563	0.248409	-0.248409
												ASAP1-IT2	0.0382367	-0.102257	0.17873	6.7855	0.537216	0.591815	0.796336	-5.85675	0.227814	0.227814
												ASAP2	-0.00360112	-0.1396	0.132398	9.12849	-0.0522669	0.958377	0.982242	-5.99162	0.0184637	-0.0184637
												ASAP3	0.0381571	-0.0986729	0.174987	8.81959	0.550452	0.582726	0.790208	-5.84997	0.234536	0.234536
												ASB1	-0.092588	-0.184479	-0.000696492	9.21875	-1.98886	0.0483076	0.23228	-4.14761	1.31598	-1.31598
												ASB10	0.00610636	-0.0500909	0.0623036	8.61278	0.214483	0.830425	0.927283	-5.97119	0.0806994	0.0806994
												ASB11	0.020361	-0.0377234	0.0784455	4.76275	0.691934	0.489915	0.725952	-5.76717	0.309879	0.309879
												ASB12	-0.127663	-0.265405	0.0100782	8.26119	-1.82948	0.0690659	0.275215	-4.42863	1.16074	-1.16074
												ASB13	-0.249832	-0.362369	-0.137295	8.38404	-4.38206	2.04337e-05	0.00829915	2.57283	4.68965	-4.68965
												ASB14	-0.0918846	-0.163505	-0.0202645	7.0009	-2.5324	0.0122265	0.113173	-3.02331	1.9127	-1.9127
												ASB15	-0.0249928	-0.0707033	0.0207177	5.62095	-1.07925	0.281991	0.555181	-5.44487	0.549765	-0.549765
												ASB16	-0.0349117	-0.0960601	0.0262367	8.73315	-1.12697	0.261331	0.535895	-5.39553	0.582809	-0.582809
												ASB16-AS1	0.202512	0.0713376	0.333686	6.59736	3.04738	0.00267409	0.0550928	-1.72946	2.57282	2.57282
												ASB17	-0.040305	-0.0964931	0.0158831	4.51614	-1.41592	0.158612	0.413102	-5.05205	0.799664	-0.799664
												ASB2	-0.0462463	-0.13969	0.0471973	5.91219	-0.976906	0.329992	0.59909	-5.54359	0.481496	-0.481496
												ASB3	-0.153299	-0.290911	-0.0156872	10.2707	-2.19892	0.0292228	0.178606	-3.74325	1.53428	-1.53428
												ASB4	-0.0561129	-0.129957	0.0177316	6.41277	-1.49993	0.135473	0.381227	-4.9379	0.868147	-0.868147
												ASB5	-0.0987014	-0.248921	0.0515179	4.38671	-1.29695	0.196392	0.459084	-5.20274	0.706877	-0.706877
												ASB6	0.0263697	-0.0504455	0.103185	8.37195	0.677616	0.498929	0.731941	-5.7764	0.301961	0.301961
												ASB7	0.0409033	-0.084857	0.166664	7.87628	0.642007	0.521726	0.749712	-5.79853	0.282557	0.282557
												ASB8	-0.03802	-0.127491	0.051451	8.8493	-0.838793	0.402754	0.661505	-5.6614	0.39496	-0.39496
												ASB9	0.0406478	-0.0341676	0.115463	5.21982	1.07244	0.285032	0.558137	-5.45175	0.545106	0.545106
												ASCC1	-0.195332	-0.355819	-0.0348458	9.32409	-2.40249	0.0173522	0.135925	-3.31503	1.76065	-1.76065
												ASCC2	0.0866446	-0.0476717	0.220961	7.85478	1.27332	0.204628	0.469198	-5.23113	0.689035	0.689035
												ASCC3	0.0566804	-0.144998	0.258359	8.83593	0.554751	0.579788	0.788478	-5.84773	0.236731	0.236731
												ASCL1	-0.424624	-0.839278	-0.00997061	9.91482	-2.02136	0.0447978	0.223895	-4.08756	1.34874	-1.34874
												ASCL2	0.0408906	-0.027645	0.109426	6.77085	1.17769	0.240551	0.512633	-5.34078	0.618792	0.618792
												ASCL3	-0.0275024	-0.09068	0.0356752	6.62485	-0.859277	0.391388	0.652444	-5.64505	0.407393	-0.407393
												ASCL5	-0.0139224	-0.0726901	0.0448453	5.50105	-0.467629	0.640644	0.826868	-5.88972	0.193383	-0.193383
												ASF1A	-0.234975	-0.411901	-0.0580494	8.98444	-2.62154	0.00954073	0.100526	-2.81497	2.02042	-2.02042
												ASF1B	0.163459	-0.0150892	0.342007	7.94442	1.80709	0.0725026	0.282052	-4.46631	1.13965	1.13965
												ASGR1	-0.0182876	-0.116355	0.0797796	6.55339	-0.368093	0.713258	0.86663	-5.92896	0.146753	-0.146753
												ASGR2	0.0123199	-0.0688794	0.0935192	7.40407	0.299488	0.764931	0.896933	-5.95057	0.116378	0.116378
												ASH1L	-0.169168	-0.280293	-0.0580419	9.82219	-3.00489	0.00305549	0.0584656	-1.84438	2.51492	-2.51492
												ASH1L-AS1	-0.0451342	-0.166154	0.0758853	8.42551	-0.736167	0.462636	0.70821	-5.73743	0.334761	-0.334761
												ASH2L	0.00746443	-0.0674715	0.0824004	9.99481	0.196622	0.844356	0.93304	-5.97466	0.0734743	0.0734743
												ASIC1	-0.228638	-0.398631	-0.0586463	8.97242	-2.65488	0.00868104	0.095984	-2.73533	2.06143	-2.06143
												ASIC2	-0.129106	-0.286839	0.0286277	6.36353	-1.61565	0.108009	0.340035	-4.77018	0.966538	-0.966538
												ASIC3	4.83393e-05	-0.179695	0.179791	6.51313	0.000530852	0.999577	0.999809	-5.99291	0.00018372	0.00018372
												ASIC4	-0.124526	-0.334697	0.0856462	8.25864	-1.16952	0.243816	0.516081	-5.34976	0.612938	-0.612938
												ASIC5	-0.0057839	-0.0419626	0.0303948	5.40082	-0.315568	0.752714	0.889684	-5.9459	0.12337	-0.12337
												ASIP	0.0244347	-0.0392562	0.0881256	6.04835	0.757278	0.449923	0.6991	-5.7226	0.346862	0.346862
												ASL	0.341671	0.169514	0.513829	8.12877	3.91749	0.000129049	0.0147284	0.928897	3.88925	3.88925
												ASLP1	-0.00417623	-0.0572673	0.0489149	6.53333	-0.15527	0.876791	0.946588	-5.98153	0.0571039	-0.0571039
												ASMT	-0.0171005	-0.0688938	0.0346928	5.94874	-0.651721	0.515454	0.744685	-5.79261	0.28781	-0.28781
												ASMTL	-0.0324839	-0.152462	0.0874943	9.21164	-0.53443	0.593737	0.797602	-5.85816	0.226406	-0.226406
												ASMTL-AS1	-0.0465335	-0.131555	0.0384879	7.48221	-1.08035	0.281506	0.554751	-5.44376	0.550512	-0.550512
												ASNA1	0.128541	0.00207177	0.25501	9.67241	2.00624	0.0464035	0.22721	-4.11563	1.33345	1.33345
												ASNS	0.125205	-0.0540105	0.304421	10.0241	1.37902	0.169685	0.426859	-5.10017	0.770358	0.770358
												ASNSD1	0.00957835	-0.0890503	0.108207	9.61283	0.191696	0.848207	0.93447	-5.97556	0.071498	0.071498
												ASPA	-0.321286	-0.691074	0.0485012	7.73589	-1.715	0.0881516	0.309581	-4.61656	1.05477	-1.05477
												ASPDH	-0.0297554	-0.119787	0.0602764	7.39441	-0.652372	0.515035	0.744326	-5.79221	0.288163	-0.288163
												ASPG	0.0263109	-0.0345284	0.0871501	6.89643	0.853643	0.394494	0.655238	-5.64959	0.40396	0.40396
												ASPH	-0.265086	-0.428887	-0.101286	9.75134	-3.19446	0.00166755	0.0442023	-1.32071	2.77792	-2.77792
												ASPHD1	-0.199237	-0.471478	0.0730033	9.48593	-1.44458	0.1504	0.402577	-5.01383	0.822752	-0.822752
												ASPHD2	0.0813851	-0.127816	0.290587	7.90461	0.767901	0.443603	0.694068	-5.71497	0.353006	0.353006
												ASPM	0.409569	-0.0460793	0.865216	7.64361	1.77428	0.0777918	0.291276	-4.5207	1.10907	1.10907
												ASPN	0.33496	-0.0502465	0.720167	6.83625	1.71642	0.087891	0.309393	-4.6143	1.05606	1.05606
												ASPRV1	0.0189346	-0.0567129	0.0945821	7.41812	0.494068	0.621891	0.816324	-5.87773	0.206286	0.206286
												ASPSCR1	0.0677997	-0.0365279	0.172127	8.01156	1.28278	0.2013	0.464833	-5.21982	0.696157	0.696157
												ASRGL1	-0.228282	-0.440821	-0.0157425	9.87013	-2.12011	0.0354363	0.198595	-3.89947	1.45055	-1.45055
												ASS1	0.177908	-0.120457	0.476274	8.55072	1.17699	0.240831	0.512976	-5.34156	0.618287	0.618287
												ASTE1	0.0920003	-0.00280477	0.186805	7.66677	1.9155	0.0570931	0.252203	-4.27974	1.24342	1.24342
												ASTN1	-0.163521	-0.401677	0.0746349	10.0621	-1.35531	0.177103	0.435844	-5.13044	0.751773	-0.751773
												ASTN2	-0.449253	-0.720883	-0.177623	9.25185	-3.26467	0.00132322	0.0388059	-1.11961	2.87837	-2.87837
												ASXL1	-0.00809471	-0.120178	0.103989	9.48811	-0.142556	0.886808	0.950385	-5.98331	0.0521702	-0.0521702
												ASXL2	0.0681476	-0.0422639	0.178559	10.5686	1.21832	0.224776	0.493577	-5.29522	0.648249	0.648249
												ASXL3	-0.235046	-0.48338	0.0132888	7.86075	-1.86827	0.0634305	0.26426	-4.36229	1.1977	-1.1977
												ASZ1	-0.00111774	-0.0340045	0.031769	3.94204	-0.0670882	0.94659	0.977167	-5.99078	0.0238382	-0.0238382
												ATAD1	-0.3751	-0.573578	-0.176622	9.41051	-3.73044	0.000259617	0.0192312	0.309736	3.58567	-3.58567
												ATAD2	0.139821	-0.122677	0.402319	7.86556	1.05141	0.294551	0.566417	-5.47269	0.530839	0.530839
												ATAD2B	0.0209672	-0.143663	0.185598	7.73909	0.251395	0.80181	0.913844	-5.96307	0.0959285	0.0959285
												ATAD3A	0.0387106	-0.0299559	0.107377	8.36742	1.11278	0.26736	0.541614	-5.41042	0.572904	0.572904
												ATAD3B	0.0341686	-0.025038	0.0933753	9.13825	1.13915	0.256229	0.530225	-5.3826	0.591372	0.591372
												ATAD3C	0.0424622	-0.0470171	0.131941	6.48685	0.93671	0.350225	0.616684	-5.57971	0.455652	0.455652
												ATAD5	-0.0496076	-0.134201	0.0349859	5.92244	-1.15754	0.248662	0.522132	-5.36282	0.604391	-0.604391
												ATAT1	-0.192784	-0.379144	-0.00642408	9.3816	-2.04194	0.0426896	0.218016	-4.04906	1.36968	-1.36968
												ATCAY	-0.362458	-0.659355	-0.0655614	9.58311	-2.40978	0.0170205	0.134551	-3.29902	1.76903	-1.76903
												ATE1	-0.399286	-0.571395	-0.227177	8.41567	-4.57938	8.93454e-06	0.00562515	3.31489	5.04893	-5.04893
												ATF1	0.168848	-0.0380752	0.37577	8.12615	1.61069	0.109087	0.341857	-4.77761	0.962225	0.962225
												ATF2	-0.019545	-0.144672	0.105582	9.28866	-0.308325	0.758209	0.892398	-5.94803	0.120211	-0.120211
												ATF3	0.122598	-0.159853	0.405048	8.9852	0.856771	0.392768	0.653523	-5.64707	0.405864	0.405864
												ATF4	-0.0333845	-0.159883	0.0931139	11.1787	-0.520937	0.603083	0.803727	-5.86487	0.219623	-0.219623
												ATF4P3	-0.0333845	-0.159883	0.0931139	11.1787	-0.520937	0.603083	0.803727	-5.86487	0.219623	-0.219623
												ATF4P4	0.0354214	-0.0383028	0.109146	4.65849	0.948377	0.344273	0.611439	-5.56938	0.463097	0.463097
												ATF5	0.217938	0.0240355	0.41184	8.40438	2.21858	0.0278288	0.174292	-3.70344	1.55551	1.55551
												ATF6	-0.0749626	-0.16395	0.0140253	9.87881	-1.6628	0.0981808	0.324595	-4.69838	1.00797	-1.00797
												ATF6B	-0.00896063	-0.0686735	0.0507523	7.88947	-0.296207	0.76743	0.898152	-5.95149	0.114961	-0.114961
												ATF7	0.0301086	-0.0694704	0.129688	8.66666	0.596826	0.551411	0.770208	-5.8249	0.258525	0.258525
												ATF7IP	0.0344438	-0.0600044	0.128892	10.8291	0.719851	0.472597	0.714699	-5.74861	0.325509	0.325509
												ATF7IP2	-0.0691008	-0.157156	0.0189539	7.51409	-1.54902	0.123222	0.363752	-4.86823	0.909311	-0.909311
												ATG10	0.00218862	-0.0592735	0.0636508	6.98489	0.070289	0.944046	0.976166	-5.99058	0.025007	0.025007
												ATG101	0.118091	-0.00316081	0.239343	8.83588	1.92244	0.056208	0.250556	-4.26744	1.2502	1.2502
												ATG12	0.0676873	-0.0652385	0.200613	9.34677	1.00513	0.31625	0.587622	-5.51734	0.499969	0.499969
												ATG13	-0.0931653	-0.182323	-0.00400756	9.54126	-2.06263	0.0406567	0.212679	-4.01	1.39087	-1.39087
												ATG14	-0.0631762	-0.194965	0.0686126	9.25999	-0.946238	0.345359	0.612724	-5.57129	0.461729	-0.461729
												ATG16L1	0.0734946	-0.00958148	0.156571	7.82103	1.74624	0.0825602	0.300261	-4.56643	1.08323	1.08323
												ATG16L2	0.0602511	-0.0701532	0.190655	7.6286	0.912008	0.363046	0.6271	-5.60116	0.440039	0.440039
												ATG2A	0.0343548	-0.0627192	0.131429	8.57583	0.69857	0.485768	0.723209	-5.76282	0.313571	0.313571
												ATG2B	-0.261807	-0.417681	-0.105932	9.06843	-3.31536	0.00111707	0.036022	-0.972018	2.95192	-2.95192
												ATG3	0.0869871	-0.0440713	0.218045	10.0904	1.31013	0.191904	0.453102	-5.18668	0.716916	0.716916
												ATG4A	-0.0232927	-0.110466	0.0638807	8.39163	-0.527425	0.59858	0.800811	-5.86167	0.222878	-0.222878
												ATG4B	0.0540011	-0.0266339	0.134636	9.73337	1.32192	0.187957	0.449107	-5.17219	0.725941	0.725941
												ATG4C	0.0588601	-0.0993147	0.217035	8.08221	0.734529	0.46363	0.70821	-5.73857	0.333828	0.333828
												ATG4D	0.0766412	-0.0213826	0.174665	7.82503	1.54332	0.124598	0.365656	-4.87642	0.90449	0.90449
												ATG5	0.0747361	-0.0565049	0.205977	8.63151	1.12405	0.262563	0.537115	-5.39861	0.580767	0.580767
												ATG7	0.0452336	-0.0415298	0.131997	8.7302	1.02908	0.304891	0.576823	-5.49448	0.515855	0.515855
												ATG9A	0.0283404	-0.0461679	0.102849	9.49387	0.750803	0.453801	0.701761	-5.72719	0.343135	0.343135
												ATG9B	0.0433352	-0.0820549	0.168725	6.7368	0.682186	0.496042	0.729557	-5.77347	0.304482	0.304482
												ATIC	0.00928686	-0.0889273	0.107501	9.5763	0.186647	0.852158	0.936253	-5.97646	0.0694796	0.0694796
												ATL1	-0.375919	-0.650855	-0.100984	9.17307	-2.69892	0.00765304	0.0903331	-2.62875	2.11617	-2.11617
												ATL2	0.132607	0.00952719	0.255687	8.98742	2.12669	0.0348765	0.196841	-3.88661	1.45747	1.45747
												ATL3	0.306358	0.111029	0.501687	10.0465	3.0959	0.00229256	0.0511396	-1.59651	2.63968	2.63968
												ATM	0.0611296	-0.0811557	0.203415	9.0952	0.84804	0.397598	0.657266	-5.65407	0.400556	0.400556
												ATMIN	-0.146302	-0.257806	-0.0347976	9.39919	-2.5899	0.0104262	0.104243	-2.88967	1.98187	-1.98187
												ATN1	0.0133484	-0.14587	0.172567	9.43862	0.165486	0.868756	0.942659	-5.97998	0.0611021	0.0611021
												ATOH1	-0.0398618	-0.119583	0.0398596	6.71523	-0.986977	0.325045	0.593994	-5.53431	0.488057	-0.488057
												ATOH7	-0.085606	-0.16041	-0.0108016	5.86337	-2.25893	0.0251481	0.165853	-3.62071	1.5995	-1.5995
												ATOH8	-0.162686	-0.294922	-0.0304496	7.80161	-2.42842	0.0161983	0.131035	-3.25792	1.79053	-1.79053
												ATOX1	0.00625741	-0.111431	0.123946	10.1391	0.104951	0.916538	0.964363	-5.98771	0.0378497	0.0378497
												ATP10A	-0.12362	-0.27721	0.0299706	8.24106	-1.58873	0.113965	0.349609	-4.81027	0.943229	-0.943229
												ATP10B	-0.251379	-0.472904	-0.0298534	8.09172	-2.23991	0.0263821	0.169878	-3.65988	1.57869	-1.57869
												ATP10D	0.160856	-0.0523787	0.37409	8.53533	1.48903	0.138316	0.385286	-4.95306	0.859127	0.859127
												ATP11A	0.0767846	-0.107669	0.261238	9.07822	0.821699	0.41239	0.668708	-5.67475	0.384692	0.384692
												ATP11A-AS1	-0.00150917	-0.0406101	0.0375918	4.27474	-0.0761861	0.93936	0.974208	-5.99017	0.027168	-0.027168
												ATP11B	0.0854681	-0.031009	0.201945	8.66978	1.4484	0.149332	0.401325	-5.00868	0.825848	0.825848
												ATP11C	0.138738	-0.0561927	0.333669	8.0229	1.40488	0.161865	0.417133	-5.06658	0.790846	0.790846
												ATP12A	-0.0423764	-0.10502	0.020267	7.01991	-1.33529	0.183554	0.444174	-5.1556	0.736237	-0.736237
												ATP13A1	0.0930803	-0.0176005	0.203761	9.46209	1.66001	0.0987409	0.325669	-4.70268	1.0055	1.0055
												ATP13A2	0.0182087	-0.121381	0.157798	8.44109	0.257484	0.797114	0.911774	-5.96161	0.0984795	0.0984795
												ATP13A3	0.224769	0.010811	0.438726	9.21577	2.07364	0.0396083	0.210054	-3.98904	1.40221	1.40221
												ATP13A4	-0.135027	-0.429522	0.159468	8.7136	-0.905041	0.366714	0.630251	-5.60711	0.435672	-0.435672
												ATP13A4-AS1	-0.27446	-0.403698	-0.145222	4.56756	-4.19193	4.42352e-05	0.0105698	1.88216	4.35423	-4.35423
												ATP13A5	-0.0775103	-0.167424	0.0124038	7.04734	-1.7016	0.0906439	0.312868	-4.6378	1.04266	-1.04266
												ATP1A1	0.236767	0.0797734	0.393761	10.9299	2.9769	0.00333333	0.0611403	-1.91927	2.47712	2.47712
												ATP1A1-AS1	-0.0344333	-0.102468	0.0336009	6.81984	-0.999026	0.31919	0.589602	-5.52308	0.49595	-0.49595
												ATP1A2	-0.24287	-0.668586	0.182846	11.2781	-1.12611	0.261694	0.536261	-5.39644	0.582206	-0.582206
												ATP1A3	-0.554111	-0.992564	-0.115657	7.98733	-2.49458	0.0135573	0.119345	-3.1097	1.86783	-1.86783
												ATP1A4	-0.0336172	-0.094488	0.0272535	6.2207	-1.09013	0.277186	0.55092	-5.43381	0.557229	-0.557229
												ATP1B1	-0.168186	-0.464195	0.127823	11.3605	-1.12153	0.263632	0.538266	-5.40127	0.579002	-0.579002
												ATP1B2	-0.154614	-0.394583	0.0853542	10.502	-1.27181	0.205165	0.469612	-5.23293	0.687897	-0.687897
												ATP1B3	0.102177	-0.0247362	0.22909	11.047	1.58917	0.113864	0.349448	-4.80961	0.943615	0.943615
												ATP1B4	0.00300148	-0.0966978	0.102701	5.06019	0.0594249	0.952683	0.979679	-5.99124	0.0210516	0.0210516
												ATP23	-0.138352	-0.535153	0.25845	6.38582	-0.688235	0.492235	0.726679	-5.76957	0.307827	-0.307827
												ATP2A1	-0.0322153	-0.0968319	0.0324012	6.15999	-0.984111	0.326448	0.595519	-5.53696	0.486186	-0.486186
												ATP2A1-AS1	-0.00543426	-0.107104	0.0962359	6.65422	-0.105505	0.916099	0.964251	-5.98765	0.0380578	-0.0380578
												ATP2A2	0.00217984	-0.121749	0.126109	11.5914	0.0347197	0.972344	0.988601	-5.99234	0.0121802	0.0121802
												ATP2A3	-0.00403474	-0.0752629	0.0671934	7.88546	-0.111812	0.911103	0.961581	-5.98701	0.0404324	-0.0404324
												ATP2B1	-0.116813	-0.377445	0.143819	9.42453	-0.884683	0.377567	0.640667	-5.62423	0.423006	-0.423006
												ATP2B1-AS1	-0.263568	-0.476291	-0.050845	8.93384	-2.4457	0.0154679	0.127474	-3.21957	1.81057	-1.81057
												ATP2B2	-0.52535	-0.863593	-0.187107	9.11981	-3.06581	0.00252277	0.053293	-1.67919	2.59812	-2.59812
												ATP2B3	-0.256255	-0.495539	-0.0169715	6.70074	-2.1139	0.0359704	0.199962	-3.91153	1.44405	-1.44405
												ATP2B4	-0.0475696	-0.205418	0.110278	10.7227	-0.594862	0.55272	0.770794	-5.826	0.257495	-0.257495
												ATP2C1	-0.0680421	-0.18869	0.0526063	9.04328	-1.11322	0.267172	0.54142	-5.40996	0.573209	-0.573209
												ATP2C2	-0.0354953	-0.105806	0.034815	6.31898	-0.996498	0.320413	0.590261	-5.52545	0.49429	-0.49429
												ATP2C2-AS1	-0.00118282	-0.0795412	0.0771755	6.45933	-0.0297961	0.976264	0.990237	-5.99249	0.0104326	-0.0104326
												ATP4A	-0.0199	-0.0783057	0.0385058	6.18256	-0.672546	0.502142	0.734738	-5.77962	0.299174	-0.299174
												ATP4B	-0.00473668	-0.0659928	0.0565194	5.43963	-0.152633	0.878867	0.947278	-5.98191	0.0560769	-0.0560769
												ATP5F1A	0.0552913	-0.0622238	0.172806	12.3922	0.928728	0.354336	0.619994	-5.5867	0.450584	0.450584
												ATP5F1B	0.021997	-0.103028	0.147022	12.0141	0.347291	0.728799	0.875378	-5.93598	0.137392	0.137392
												ATP5F1C	-0.147543	-0.259303	-0.0357822	11.4667	-2.60588	0.00997016	0.102258	-2.85205	2.0013	-2.0013
												ATP5F1D	0.0425767	-0.0888384	0.173992	10.112	0.639517	0.523341	0.750359	-5.80003	0.281216	0.281216
												ATP5F1E	0.046321	-0.0571583	0.1498	12.1678	0.883587	0.378157	0.641112	-5.62514	0.422328	0.422328
												ATP5IF1	-0.106639	-0.21394	0.000662333	9.74201	-1.96172	0.051415	0.23922	-4.19706	1.28891	-1.28891
												ATP5MC1	-0.0418985	-0.132745	0.0489476	9.72003	-0.910369	0.363906	0.627479	-5.60256	0.439011	-0.439011
												ATP5MC2	0.045039	-0.054796	0.144874	11.1719	0.890494	0.374449	0.637638	-5.61938	0.426608	0.426608
												ATP5MC2P1	-0.0239168	-0.113035	0.0652018	6.78234	-0.529736	0.59698	0.799807	-5.86051	0.22404	-0.22404
												ATP5MC3	0.0755384	-0.113804	0.26488	11.1462	0.787492	0.432082	0.685774	-5.70064	0.364434	0.364434
												ATP5MD	-0.160086	-0.279569	-0.0406034	11.7222	-2.64468	0.0089363	0.0973461	-2.75979	2.04884	-2.04884
												ATP5MDP1	-0.160086	-0.279569	-0.0406034	11.7222	-2.64468	0.0089363	0.0973461	-2.75979	2.04884	-2.04884
												ATP5ME	-0.0109323	-0.121615	0.09975	11.3576	-0.194965	0.845651	0.93357	-5.97496	0.0728088	-0.0728088
												ATP5MF	0.278363	0.138353	0.418374	11.6798	3.92443	0.000125684	0.0146242	0.952351	3.90072	3.90072
												ATP5MG	0.0435831	-0.0527406	0.139907	11.4487	0.893122	0.373044	0.636859	-5.61718	0.42824	0.42824
												ATP5MPL	-0.0329855	-0.144963	0.0789917	11.3379	-0.581459	0.561695	0.776346	-5.83343	0.250499	-0.250499
												ATP5PB	0.0819803	-0.0298551	0.193816	11.799	1.44696	0.149735	0.401731	-5.01063	0.824675	0.824675
												ATP5PD	0.0978478	0.00985599	0.18584	11.7078	2.195	0.0295079	0.179518	-3.75115	1.53006	1.53006
												ATP5PF	0.0114407	-0.0820519	0.104933	11.2761	0.241546	0.809421	0.916983	-5.96536	0.0918257	0.0918257
												ATP5PO	-0.0238118	-0.117433	0.0698098	11.6042	-0.502044	0.616281	0.812424	-5.87398	0.210221	-0.210221
												ATP6AP1	0.117284	0.0259991	0.208569	11.0172	2.53609	0.0121032	0.112542	-3.01482	1.9171	1.9171
												ATP6AP1L	-0.103632	-0.235018	0.0277542	7.61322	-1.55693	0.121332	0.360993	-4.85679	0.916026	-0.916026
												ATP6AP2	0.0492136	-0.0316418	0.130069	11.8321	1.20144	0.231239	0.501173	-5.31434	0.635939	0.635939
												ATP6V0A1	-0.123508	-0.274285	0.0272676	10.3434	-1.61692	0.107734	0.339656	-4.76826	0.967649	-0.967649
												ATP6V0A2	-0.0501794	-0.181287	0.0809283	8.76216	-0.755479	0.450999	0.69951	-5.72388	0.345825	-0.345825
												ATP6V0A4	-0.0580274	-0.147633	0.0315787	5.38102	-1.27827	0.202884	0.466989	-5.22523	0.692752	-0.692752
												ATP6V0B	0.138441	-0.0149192	0.291801	10.6667	1.78188	0.0765401	0.28895	-4.50819	1.11611	1.11611
												ATP6V0C	-0.0332676	-0.148386	0.0818507	12.3675	-0.57043	0.569133	0.781423	-5.83941	0.244786	-0.244786
												ATP6V0D1	-0.0368305	-0.180618	0.106957	10.7324	-0.505606	0.613783	0.81067	-5.87229	0.211985	-0.211985
												ATP6V0D2	0.00505852	-0.0644299	0.074547	8.46923	0.143693	0.885912	0.950145	-5.98316	0.0526096	0.0526096
												ATP6V0E1	0.111688	-0.0375555	0.260931	11.4063	1.47719	0.14146	0.390183	-4.96943	0.849366	0.849366
												ATP6V0E1P2	0.0379898	-0.0402087	0.116188	5.95179	0.958945	0.338937	0.606682	-5.55992	0.469881	0.469881
												ATP6V0E2	0.0414454	-0.130938	0.213829	11.5603	0.474577	0.635693	0.824493	-5.88663	0.196753	0.196753
												ATP6V0E2-AS1	0.0808905	-0.0591901	0.220971	7.4346	1.13984	0.255943	0.530097	-5.38186	0.591858	0.591858
												ATP6V1A	-0.120814	-0.280643	0.0390146	11.1574	-1.49207	0.13752	0.384249	-4.94885	0.861634	-0.861634
												ATP6V1B1	0.0517235	-0.0225975	0.126044	6.6693	1.37373	0.171319	0.428691	-5.10697	0.766193	0.766193
												ATP6V1B2	-0.0152589	-0.188934	0.158416	11.3485	-0.173425	0.862522	0.940894	-5.97871	0.0642296	-0.0642296
												ATP6V1C1	-0.180221	-0.348278	-0.0121637	9.65963	-2.11677	0.0357228	0.199425	-3.90596	1.44705	-1.44705
												ATP6V1C2	0.00678628	-0.0548082	0.0683807	6.55396	0.217478	0.828095	0.926505	-5.97058	0.0819201	0.0819201
												ATP6V1D	-0.104117	-0.239416	0.0311823	10.4941	-1.51898	0.130611	0.374458	-4.91112	0.884021	-0.884021
												ATP6V1E1	-0.139897	-0.288712	0.00891904	10.5133	-1.8556	0.065228	0.267855	-4.38411	1.18557	-1.18557
												ATP6V1E2	-0.124621	-0.222997	-0.0262441	6.7533	-2.50048	0.0133416	0.118479	-3.09631	1.87479	-1.87479
												ATP6V1F	0.0698988	-0.0290425	0.16884	11.2805	1.3945	0.164973	0.420729	-5.08015	0.782588	0.782588
												ATP6V1FNB	-0.255378	-0.443231	-0.0675245	6.95397	-2.68343	0.00800143	0.0924028	-2.66643	2.09683	-2.09683
												ATP6V1G1	0.0779202	-0.0338366	0.189677	10.9041	1.37626	0.170536	0.427909	-5.10372	0.768185	0.768185
												ATP6V1G2	-0.604568	-0.975445	-0.233691	9.0201	-3.21766	0.00154549	0.0423261	-1.25468	2.81093	-2.81093
												ATP6V1G2-DDX39B	0.124735	-0.00573155	0.255202	11.8666	1.88718	0.0608259	0.259429	-4.32947	1.21591	1.21591
												ATP6V1G3	0.0162129	-0.0404444	0.0728703	4.92847	0.564847	0.572916	0.783868	-5.8424	0.241909	0.241909
												ATP6V1H	-0.144133	-0.312268	0.0240015	9.94172	-1.69212	0.0924396	0.316083	-4.65272	1.03414	-1.03414
												ATP7A	0.108821	-0.0769745	0.294617	7.78664	1.15612	0.249241	0.522853	-5.36436	0.603381	0.603381
												ATP7B	-0.176009	-0.300074	-0.0519446	7.92816	-2.80035	0.00569104	0.0785794	-2.37716	2.24481	-2.24481
												ATP8A1	-0.657937	-1.12847	-0.187398	8.96163	-2.76003	0.00640837	0.0834924	-2.47817	2.19325	-2.19325
												ATP8A2	-0.455398	-0.845871	-0.0649242	7.40928	-2.3021	0.022532	0.156712	-3.53063	1.6472	-1.6472
												ATP8A2P3	0.00437277	-0.0383975	0.047143	4.342	0.201809	0.840305	0.931288	-5.97368	0.0755628	0.0755628
												ATP8B1	-0.0219555	-0.176674	0.132763	10.1581	-0.280108	0.779732	0.903219	-5.95587	0.108054	-0.108054
												ATP8B2	0.0508996	-0.0643181	0.166117	9.08168	0.872008	0.384424	0.647143	-5.63469	0.41519	0.41519
												ATP8B3	0.0451737	-0.0152279	0.105575	5.5509	1.47626	0.141709	0.390274	-4.97071	0.848603	0.848603
												ATP8B4	0.0487094	-0.121136	0.218554	5.42566	0.56609	0.572073	0.783433	-5.84174	0.242549	0.242549
												ATP8B5P	0.0768376	-0.0687913	0.222467	10.4967	1.04148	0.299119	0.570949	-5.48243	0.524156	0.524156
												ATP9A	-0.251521	-0.448128	-0.0549141	10.6888	-2.52523	0.0124696	0.113931	-3.03979	1.90415	-1.90415
												ATP9B	-0.0256476	-0.123848	0.072553	8.17313	-0.515534	0.606844	0.806269	-5.86751	0.216923	-0.216923
												ATPAF1	0.000502903	-0.143633	0.144639	9.50879	0.00688713	0.994513	0.997432	-5.99289	0.00238957	0.00238957
												ATPAF2	0.0387743	-0.0354261	0.112975	7.44836	1.03149	0.303766	0.575407	-5.49215	0.51746	0.51746
												ATPSCKMT	-0.00693729	-0.115743	0.101869	8.55102	-0.125853	0.899996	0.956112	-5.98543	0.0457594	-0.0457594
												ATR	0.12105	-0.0182655	0.260366	8.98094	1.71511	0.0881331	0.309581	-4.6164	1.05486	1.05486
												ATRAID	0.207605	0.0540292	0.36118	10.6034	2.66834	0.0083545	0.0939247	-2.70294	2.07808	2.07808
												ATRIP	0.0425344	-0.0337594	0.118828	9.4932	1.10046	0.272673	0.547329	-5.4232	0.564358	0.564358
												ATRN	-0.0073972	-0.116138	0.101344	9.84277	-0.134276	0.893342	0.952971	-5.9844	0.0489824	-0.0489824
												ATRNL1	-0.386216	-0.695988	-0.0764441	7.51301	-2.46101	0.0148452	0.125317	-3.18538	1.82841	-1.82841
												ATRX	0.0134992	-0.12977	0.156768	10.1352	0.185987	0.852675	0.936511	-5.97658	0.0692165	0.0692165
												ATXN1	0.0216556	-0.10809	0.151401	10.1659	0.32946	0.74221	0.883651	-5.94167	0.129473	0.129473
												ATXN10	-0.0808028	-0.210357	0.0487516	11.6212	-1.23112	0.219966	0.487891	-5.28056	0.657645	-0.657645
												ATXN1L	-0.036954	-0.107671	0.0337633	9.50128	-1.03148	0.303768	0.575407	-5.49216	0.517457	-0.517457
												ATXN2	0.0236343	-0.0712386	0.118507	9.18829	0.491728	0.623541	0.817588	-5.87882	0.205135	0.205135
												ATXN2L	0.0188537	-0.092624	0.130332	7.9209	0.333837	0.738911	0.882288	-5.9403	0.131408	0.131408
												ATXN3	-0.00693041	-0.137565	0.123704	7.16298	-0.104719	0.916721	0.964363	-5.98773	0.0377628	-0.0377628
												ATXN3L	-0.0315957	-0.0870989	0.0239075	4.90924	-1.12366	0.262729	0.537237	-5.39902	0.580492	-0.580492
												ATXN7	0.0424452	-0.0631699	0.14806	8.78616	0.793282	0.42871	0.683599	-5.69633	0.367836	0.367836
												ATXN7L1	0.0699203	-0.0711563	0.210997	7.77869	0.978303	0.329303	0.598529	-5.54231	0.482404	0.482404
												ATXN7L2	0.0757625	-0.0114121	0.162937	5.85719	1.7155	0.0880614	0.309581	-4.61578	1.05522	1.05522
												ATXN7L3	0.0067402	-0.0932028	0.106683	9.19112	0.133121	0.894254	0.953192	-5.98454	0.0485391	0.0485391
												ATXN7L3B	-0.026041	-0.157722	0.10564	10.4996	-0.390356	0.696758	0.857003	-5.92099	0.156918	-0.156918
												ATXN8OS	-0.0657913	-0.117635	-0.0139478	6.72694	-2.50495	0.0131803	0.117677	-3.08614	1.88008	-1.88008
												AUH	-0.0371572	-0.195667	0.121352	8.65719	-0.462714	0.644156	0.829461	-5.89188	0.191009	-0.191009
												AUNIP	-0.0143035	-0.123444	0.0948375	7.46837	-0.258689	0.796185	0.911438	-5.96132	0.0989858	-0.0989858
												AUP1	0.0829801	-0.0213745	0.187335	9.24354	1.5696	0.118354	0.35592	-4.83837	0.926819	0.926819
												AURKA	0.19602	-0.019493	0.411532	7.79497	1.79536	0.0743577	0.285062	-4.48585	1.12867	1.12867
												AURKAIP1	0.0547232	-0.0499287	0.159375	10.3305	1.03217	0.303449	0.575349	-5.4915	0.517915	0.517915
												AURKB	0.217557	-0.0181803	0.453294	7.23583	1.82167	0.0702482	0.27741	-4.44181	1.15336	1.15336
												AURKC	0.027525	-0.0636308	0.118681	7.07686	0.596031	0.551941	0.770595	-5.82534	0.258107	0.258107
												AUTS2	0.233928	0.046175	0.421681	10.6907	2.45935	0.0149117	0.12573	-3.18909	1.82647	1.82647
												AVEN	0.05344	-0.0843205	0.191201	7.83977	0.765715	0.444899	0.695036	-5.71655	0.351739	0.351739
												AVIL	0.0136792	-0.141817	0.169176	9.00163	0.173646	0.862349	0.9408	-5.97867	0.0643171	0.0643171
												AVL9	0.160755	0.0390829	0.282427	9.43639	2.60795	0.0099125	0.102083	-2.84716	2.00382	2.00382
												AVP	0.0159265	-0.050948	0.0828009	6.48705	0.470093	0.638886	0.826426	-5.88863	0.194577	0.194577
												AVPI1	-0.0970648	-0.219304	0.0251742	8.40684	-1.56739	0.118868	0.356918	-4.84159	0.924936	-0.924936
												AVPR1A	0.0312128	-0.0585353	0.120961	6.87233	0.686488	0.493333	0.727412	-5.7707	0.30686	0.30686
												AVPR1B	-0.0205541	-0.0897501	0.048642	7.57135	-0.58633	0.558425	0.774785	-5.83075	0.253035	-0.253035
												AVPR2	0.0374529	-0.0271213	0.102027	6.6964	1.14486	0.253864	0.527785	-5.3765	0.595398	0.595398
												AWAT1	-0.00195757	-0.0468233	0.0429081	5.41351	-0.0861249	0.931468	0.971029	-5.98941	0.0308322	-0.0308322
												AXDND1	0.00928781	-0.0287554	0.047331	4.30568	0.481905	0.630488	0.822006	-5.88333	0.200323	0.200323
												AXIN1	0.0257811	-0.0503235	0.101886	8.60602	0.668676	0.504602	0.736361	-5.78207	0.297051	0.297051
												AXIN2	-0.124234	-0.300407	0.0519384	8.47439	-1.39196	0.165737	0.421543	-5.08344	0.780581	-0.780581
												AXL	0.170934	-0.0306955	0.372563	9.4233	1.6734	0.0960727	0.321827	-4.68196	1.0174	1.0174
												AZGP1	-0.059028	-0.393582	0.275526	7.34928	-0.348271	0.728064	0.87501	-5.93566	0.13783	-0.13783
												AZGP1P1	-0.0581166	-0.321123	0.20489	7.23293	-0.436173	0.66326	0.840168	-5.90313	0.178316	-0.178316
												AZI2	0.0171662	-0.102916	0.137248	8.76618	0.282177	0.778148	0.902637	-5.95532	0.108938	0.108938
												AZIN1	-0.150542	-0.293325	-0.00775935	10.6417	-2.08117	0.0389049	0.208823	-3.97465	1.41	-1.41
												AZIN1-AS1	-0.0114584	-0.108026	0.0851087	5.90026	-0.234218	0.815095	0.920553	-5.96701	0.0887916	-0.0887916
												AZIN2	0.0284473	-0.0759802	0.132875	8.38084	0.537714	0.591472	0.796224	-5.8565	0.228066	0.228066
												AZU1	-0.0176775	-0.076531	0.0411759	5.86763	-0.592891	0.554036	0.771725	-5.8271	0.256462	-0.256462
												B2M	0.0460575	-0.0479162	0.140031	13.5216	0.96743	0.334692	0.603151	-5.55224	0.475354	0.475354
												B3GALNT1	0.211378	-0.00350334	0.42626	8.36322	1.94172	0.0538107	0.244826	-4.23306	1.26913	1.26913
												B3GALNT2	0.173124	0.0310154	0.315233	8.63118	2.40471	0.0172506	0.135623	-3.31016	1.7632	1.7632
												B3GALT1	-0.031628	-0.0888123	0.0255564	5.9643	-1.09174	0.276479	0.550332	-5.43216	0.558337	-0.558337
												B3GALT2	-0.394793	-0.704286	-0.0852997	6.12114	-2.51793	0.0127214	0.115253	-3.05652	1.89547	-1.89547
												B3GALT4	-0.00341397	-0.111208	0.10438	7.44838	-0.0625157	0.950225	0.978594	-5.99106	0.0221735	-0.0221735
												B3GALT5	0.0381814	-0.051632	0.127995	6.86602	0.839143	0.402558	0.661351	-5.66113	0.395172	0.395172
												B3GALT5-AS1	0.00632109	-0.0608782	0.0735204	5.85245	0.185674	0.85292	0.936636	-5.97663	0.0690919	0.0690919
												B3GALT6	0.133759	-0.0292049	0.296724	9.90578	1.62016	0.107037	0.338649	-4.7634	0.970467	0.970467
												B3GAT1	-0.118299	-0.348615	0.112018	10.1211	-1.01387	0.312076	0.583787	-5.50906	0.50574	-0.50574
												B3GAT2	-0.357778	-0.77378	0.0582238	9.13157	-1.69763	0.0913919	0.313887	-4.64406	1.03909	-1.03909
												B3GAT3	0.09788	-0.0130495	0.208809	8.43406	1.74169	0.0833558	0.301769	-4.57378	1.07906	1.07906
												B3GAT3P1	0.096036	-0.0141703	0.206242	7.91788	1.7201	0.0872196	0.308341	-4.60845	1.05939	1.05939
												B3GLCT	-0.0653609	-0.241596	0.110874	8.4924	-0.732067	0.465127	0.709089	-5.74027	0.332428	-0.332428
												B3GNT2	0.0539129	-0.138773	0.246599	8.14984	0.552292	0.581467	0.789197	-5.84901	0.235475	0.235475
												B3GNT3	-0.0481239	-0.114923	0.0186752	7.83921	-1.42205	0.156828	0.411055	-5.04394	0.804575	-0.804575
												B3GNT4	-0.0492993	-0.130179	0.0315803	7.44034	-1.20317	0.23057	0.500287	-5.31239	0.637198	-0.637198
												B3GNT5	0.833604	0.505624	1.16158	8.55208	5.01692	1.30422e-06	0.00215958	5.04819	5.88465	5.88465
												B3GNT6	0.0298934	-0.0247372	0.0845239	6.24848	1.0801	0.281614	0.554775	-5.44401	0.550345	0.550345
												B3GNT7	0.167262	-0.00351256	0.338037	7.35585	1.9333	0.054847	0.247254	-4.24812	1.26085	1.26085
												B3GNT8	0.00412613	-0.0785413	0.0867936	6.53054	0.098522	0.921633	0.966769	-5.98833	0.035442	0.035442
												B3GNT9	0.174165	0.0494813	0.298849	7.75026	2.75725	0.00646081	0.0836628	-2.4851	2.18971	2.18971
												B3GNTL1	0.0669743	-0.0220169	0.155965	6.78168	1.48555	0.139236	0.386636	-4.95789	0.856249	0.856249
												B4GALNT1	-0.208685	-0.419781	0.00241092	8.05985	-1.95136	0.0526446	0.242069	-4.21575	1.27865	-1.27865
												B4GALNT2	0.0188081	-0.0366913	0.0743076	6.43716	0.668933	0.504438	0.736322	-5.78191	0.297192	0.297192
												B4GALNT3	-0.0467116	-0.107347	0.0139238	7.17394	-1.52063	0.130195	0.373877	-4.90878	0.885405	-0.885405
												B4GALNT4	0.0780801	-0.117162	0.273322	7.00386	0.789392	0.430973	0.685148	-5.69923	0.36555	0.36555
												B4GALT1	0.136682	0.00601707	0.267348	7.97792	2.0648	0.0404481	0.212155	-4.00587	1.3931	1.3931
												B4GALT2	0.038096	-0.0547728	0.130965	8.71131	0.809719	0.419224	0.674557	-5.68394	0.377553	0.377553
												B4GALT3	0.0470336	-0.0521926	0.14626	9.03112	0.935636	0.350777	0.617057	-5.58065	0.454969	0.454969
												B4GALT4	0.0986258	-0.00765693	0.204909	8.08665	1.83169	0.0687327	0.274536	-4.42487	1.16284	1.16284
												B4GALT5	0.201759	0.0180034	0.385514	10.6395	2.16729	0.0315923	0.187602	-3.80658	1.50042	1.50042
												B4GALT6	-0.305628	-0.642388	0.0311318	7.69555	-1.79142	0.0749897	0.286414	-4.4924	1.125	-1.125
												B4GALT7	0.0595038	-0.0227372	0.141745	8.15573	1.42818	0.155061	0.408341	-5.0358	0.809497	0.809497
												B4GAT1	-0.113394	-0.286685	0.0598972	10.5267	-1.29163	0.198224	0.460723	-5.20918	0.702844	-0.702844
												B9D1	0.122767	-0.00749277	0.253026	7.64184	1.86036	0.0645481	0.266385	-4.37593	1.19012	1.19012
												B9D2	0.108927	0.0252501	0.192604	6.95549	2.56954	0.0110347	0.107405	-2.93732	1.95724	1.95724
												BAALC	-0.400594	-0.622001	-0.179187	11.7033	-3.5714	0.00046104	0.0246746	-0.19663	3.33626	-3.33626
												BAALC-AS2	-0.200858	-0.373718	-0.0279968	7.77618	-2.2936	0.0230277	0.158825	-3.5485	1.63775	-1.63775
												BAAT	-0.0376033	-0.100159	0.0249526	6.99056	-1.18654	0.237051	0.507708	-5.33099	0.625159	-0.625159
												BABAM1	0.0398644	-0.0529353	0.132664	9.81954	0.847938	0.397655	0.657266	-5.65415	0.400494	0.400494
												BABAM2	-0.0558331	-0.121557	0.00989078	9.29558	-1.67685	0.0953949	0.320836	-4.6766	1.02048	-1.02048
												BACE1	-0.0306542	-0.174766	0.113458	9.9543	-0.41987	0.675106	0.846577	-5.90971	0.170628	-0.170628
												BACE1-AS	-0.101774	-0.192856	-0.0106919	8.53561	-2.20561	0.0287415	0.177224	-3.72974	1.54149	-1.54149
												BACE2	0.285931	0.0645324	0.507329	8.26766	2.54925	0.0116724	0.110638	-2.98445	1.93284	1.93284
												BACH1	0.326912	0.123085	0.530739	8.27006	3.16588	0.00183025	0.0459813	-1.40149	2.73749	2.73749
												BACH1-IT1	-0.0470355	-0.121467	0.0273958	5.50285	-1.24737	0.213963	0.480569	-5.26172	0.66966	-0.66966
												BACH2	-0.0357012	-0.182969	0.111567	7.33671	-0.47852	0.63289	0.823874	-5.88486	0.198672	-0.198672
												BAD	0.0362707	-0.0666828	0.139224	8.09437	0.695409	0.487741	0.724746	-5.7649	0.311811	0.311811
												BAG1	-0.0914086	-0.204545	0.0217279	9.18479	-1.59481	0.112596	0.347292	-4.80127	0.948475	-0.948475
												BAG2	0.020458	-0.193163	0.234079	6.56413	0.189036	0.850288	0.935225	-5.97604	0.070434	0.070434
												BAG3	-0.107458	-0.306186	0.0912692	10.1779	-1.06735	0.287314	0.560412	-5.45685	0.541643	-0.541643
												BAG4	-0.029582	-0.190114	0.13095	8.99134	-0.36374	0.716501	0.868287	-5.93046	0.144784	-0.144784
												BAG5	0.0896753	-0.0335754	0.212926	10.0656	1.43618	0.152774	0.40565	-5.02511	0.815952	0.815952
												BAG6	0.0974436	-0.00630834	0.201196	11.0446	1.85388	0.0654743	0.268188	-4.38705	1.18393	1.18393
												BAGE2	-0.0505199	-0.168629	0.0675889	6.55602	-0.844317	0.399669	0.65865	-5.65703	0.398299	-0.398299
												BAHCC1	-0.0162012	-0.0982443	0.0658419	8.05859	-0.389789	0.697177	0.857273	-5.9212	0.156657	-0.156657
												BAHD1	0.0933832	0.0107176	0.176049	8.2869	2.22982	0.0270583	0.17207	-3.68054	1.5677	1.5677
												BAIAP2	0.00862066	-0.167604	0.184846	8.56157	0.0965603	0.923188	0.967199	-5.98851	0.0347097	0.0347097
												BAIAP2-DT	-0.00158828	-0.123347	0.120171	8.28258	-0.0257484	0.979488	0.991696	-5.9926	0.00900089	-0.00900089
												BAIAP2L1	0.0116834	-0.0421242	0.0654909	5.93913	0.428598	0.668754	0.843199	-5.90622	0.174734	0.174734
												BAIAP2L2	-0.0406124	-0.151879	0.0706546	6.91776	-0.720473	0.472215	0.714314	-5.74819	0.32586	-0.32586
												BAIAP3	0.0151856	-0.166472	0.196843	8.40323	0.165008	0.869132	0.942659	-5.98005	0.0609142	0.0609142
												BAK1	0.112673	0.0260512	0.199294	7.79829	2.56755	0.0110958	0.107493	-2.94196	1.95484	1.95484
												BAMBI	-0.107468	-0.409312	0.194375	8.20471	-0.702787	0.483142	0.721522	-5.76004	0.315926	-0.315926
												BANCR	-0.0405058	-0.106792	0.0257805	6.39606	-1.2062	0.229404	0.499245	-5.30898	0.6394	-0.6394
												BANF1	0.126889	0.00562486	0.248154	11.2033	2.06546	0.0403846	0.212118	-4.00461	1.39378	1.39378
												BANF2	-0.0183434	-0.0707563	0.0340694	5.52659	-0.690825	0.49061	0.726103	-5.76789	0.309264	-0.309264
												BANK1	-0.0457263	-0.130834	0.0393813	7.09003	-1.06053	0.290396	0.563285	-5.46366	0.53701	-0.53701
												BANP	0.135416	0.0180988	0.252732	9.10781	2.27842	0.0239358	0.161822	-3.58024	1.62095	1.62095
												BAP1	0.11814	0.0386115	0.197669	9.97642	2.93224	0.0038252	0.0650701	-2.03749	2.41735	2.41735
												BARD1	0.246225	0.0133448	0.479105	9.22811	2.08701	0.0383666	0.207328	-3.96346	1.41605	1.41605
												BARHL1	-0.0175194	-0.0782323	0.0431935	7.58735	-0.569592	0.5697	0.78145	-5.83986	0.244354	-0.244354
												BARX1	0.0124122	-0.0669357	0.09176	5.99418	0.308772	0.75787	0.892299	-5.9479	0.120405	0.120405
												BARX1-DT	0.00435019	-0.0507162	0.0594166	6.15575	0.155936	0.876267	0.946296	-5.98143	0.0573635	0.0573635
												BARX2	-0.0146235	-0.100068	0.0708209	6.92785	-0.337826	0.735907	0.880112	-5.93904	0.133177	-0.133177
												BASP1	-0.404256	-0.797576	-0.0109359	10.9994	-2.02878	0.0440278	0.221383	-4.07373	1.35627	-1.35627
												BASP1-AS1	-0.00930636	-0.075076	0.0564632	5.33785	-0.279306	0.780347	0.903716	-5.95608	0.107712	-0.107712
												BATF	0.0434637	-0.0452233	0.132151	7.21208	0.967368	0.334723	0.603151	-5.5523	0.475315	0.475315
												BATF2	0.0582929	-0.12256	0.239145	7.19541	0.636232	0.525474	0.751278	-5.80201	0.279449	0.279449
												BATF3	0.247452	0.0775935	0.41731	8.37188	2.8756	0.00454435	0.0712466	-2.18507	2.34253	2.34253
												BAX	0.29847	0.0840447	0.512896	8.17242	2.74758	0.00664606	0.0847623	-2.50911	2.17744	2.17744
												BAZ1A	0.0865938	-0.153828	0.327015	8.32644	0.71095	0.478082	0.718608	-5.75461	0.320498	0.320498
												BAZ1B	0.258052	0.143395	0.372709	9.61343	4.44255	1.58999e-05	0.00737819	2.79763	4.79861	4.79861
												BAZ2A	0.0191266	-0.0825825	0.120836	8.68195	0.371195	0.71095	0.865645	-5.92787	0.148161	0.148161
												BAZ2B	-0.0320441	-0.203296	0.139208	9.9561	-0.36935	0.712323	0.866248	-5.92852	0.147323	-0.147323
												BBC3	-0.00140217	-0.110316	0.107512	7.51791	-0.0254123	0.979756	0.991716	-5.9926	0.00888221	-0.00888221
												BBIP1	-0.26368	-0.414191	-0.113168	8.5703	-3.45805	0.000686305	0.0291388	-0.546011	3.16348	-3.16348
												BBOF1	0.114982	-0.0329792	0.262944	7.69337	1.53394	0.126889	0.36906	-4.88986	0.896576	0.896576
												BBOX1	0.0306729	-0.317942	0.379288	9.32855	0.173674	0.862327	0.9408	-5.97867	0.0643281	0.0643281
												BBOX1-AS1	-0.0607039	-0.111899	-0.0095091	5.26645	-2.34054	0.020407	0.147648	-3.44909	1.69022	-1.69022
												BBS1	0.0814913	-0.0521056	0.215088	9.09738	1.20404	0.230235	0.500081	-5.31141	0.637829	0.637829
												BBS10	-0.188416	-0.339979	-0.0368521	7.59821	-2.45385	0.0151338	0.126271	-3.2014	1.82005	-1.82005
												BBS12	0.140389	-0.0212259	0.302005	6.64586	1.71466	0.0882157	0.309581	-4.61711	1.05445	1.05445
												BBS2	-0.104927	-0.268945	0.0590903	9.99529	-1.26277	0.208388	0.473631	-5.24364	0.681128	-0.681128
												BBS4	0.09823	-0.0106547	0.207115	8.10394	1.78075	0.0767249	0.289088	-4.51005	1.11506	1.11506
												BBS5	0.12369	-0.0584877	0.305867	6.11501	1.34018	0.181959	0.442441	-5.14948	0.740026	0.740026
												BBS7	-0.13395	-0.333165	0.0652661	7.47973	-1.32722	0.186201	0.447039	-5.16563	0.730019	-0.730019
												BBS9	0.16472	0.0559982	0.273443	8.49999	2.99057	0.00319482	0.0598535	-1.88276	2.49555	2.49555
												BBX	0.0805935	-0.0704647	0.231652	10.2171	1.05313	0.293765	0.566005	-5.47099	0.532	0.532
												BCAM	0.0931824	-0.0374742	0.223839	8.58564	1.40776	0.161014	0.415885	-5.06281	0.793136	0.793136
												BCAN	-0.3865	-0.800703	0.0277038	11.008	-1.84188	0.0672211	0.271489	-4.40757	1.17249	-1.17249
												BCAP29	0.167644	0.0392635	0.296025	10.074	2.57759	0.0107904	0.106246	-2.91852	1.96696	1.96696
												BCAP31	0.158879	0.0456318	0.272126	11.2353	2.76927	0.00623722	0.0820779	-2.45516	2.20501	2.20501
												BCAR1	-0.0451561	-0.139168	0.0488555	7.64594	-0.948113	0.344407	0.611439	-5.56962	0.462929	-0.462929
												BCAR3	-0.0650128	-0.231457	0.101432	7.0702	-0.771	0.441768	0.692305	-5.71273	0.354806	-0.354806
												BCAR4	-0.0253044	-0.0874676	0.0368589	5.91881	-0.803502	0.422797	0.677621	-5.68866	0.373868	-0.373868
												BCAS1	-0.384874	-0.843742	0.0739938	8.08312	-1.6556	0.0996319	0.327032	-4.70947	1.0016	-1.0016
												BCAS2	0.0248472	-0.107869	0.157563	9.85808	0.369554	0.712171	0.866112	-5.92845	0.147416	0.147416
												BCAS3	-0.0897265	-0.188694	0.00924087	8.09957	-1.78959	0.0752851	0.286982	-4.49543	1.12329	-1.12329
												BCAS4	-0.0370987	-0.161332	0.087135	7.14314	-0.589447	0.556338	0.773475	-5.82902	0.254662	-0.254662
												BCAT1	0.873276	0.452297	1.29426	10.0951	4.09465	6.50465e-05	0.0110105	1.53825	4.18678	4.18678
												BCAT2	0.146043	0.0186118	0.273475	8.26752	2.2622	0.0249411	0.165104	-3.61394	1.60308	1.60308
												BCCIP	-0.16433	-0.265652	-0.0630085	8.29416	-3.2014	0.00163013	0.0435361	-1.301	2.78778	-2.78778
												BCDIN3D	0.0449564	-0.0373996	0.127312	7.38772	1.07751	0.282766	0.555875	-5.44663	0.548572	0.548572
												BCDIN3D-AS1	-0.0427504	-0.101669	0.0161686	5.76557	-1.43222	0.153901	0.406918	-5.03041	0.812757	-0.812757
												BCHE	-0.0308673	-0.438586	0.376852	9.72913	-0.149438	0.881383	0.948823	-5.98236	0.0548351	-0.0548351
												BCKDHA	0.0717283	-0.0201864	0.163643	9.16984	1.54039	0.125309	0.366247	-4.88063	0.902016	0.902016
												BCKDHB	-0.0576244	-0.186431	0.071182	8.72151	-0.883068	0.378436	0.641333	-5.62557	0.422007	-0.422007
												BCKDK	0.123248	0.0106281	0.235867	8.57456	2.16018	0.0321476	0.189602	-3.82071	1.49285	1.49285
												BCL10	0.131029	-0.0250395	0.287098	9.08714	1.65721	0.0993062	0.326373	-4.70699	1.00302	1.00302
												BCL11A	-0.0631985	-0.303113	0.176716	8.78226	-0.519967	0.603758	0.804169	-5.86535	0.219137	-0.219137
												BCL11B	-0.177859	-0.450367	0.0946488	6.17319	-1.28832	0.199373	0.462105	-5.21317	0.700335	-0.700335
												BCL2	-0.120025	-0.301626	0.0615766	8.33283	-1.3046	0.193779	0.456027	-5.19344	0.712694	-0.712694
												BCL2A1	0.321479	-0.0213968	0.664356	6.16278	1.85072	0.0659306	0.269424	-4.39247	1.18091	1.18091
												BCL2L1	0.134621	0.00138839	0.267853	10.1238	1.99447	0.0476859	0.23093	-4.13732	1.32161	1.32161
												BCL2L10	0.0274555	-0.0347734	0.0896845	6.31423	0.870889	0.385033	0.647536	-5.63561	0.414502	0.414502
												BCL2L11	0.0541778	-0.0449287	0.153284	8.87378	1.07906	0.282078	0.555181	-5.44507	0.549631	0.549631
												BCL2L12	0.260461	0.128985	0.391936	7.81783	3.91042	0.000132563	0.0147284	0.905046	3.87758	3.87758
												BCL2L13	-0.0200593	-0.132474	0.0923555	8.93494	-0.352222	0.725104	0.873275	-5.93435	0.139599	-0.139599
												BCL2L14	-0.0477309	-0.122312	0.0268498	6.5655	-1.26328	0.208206	0.473622	-5.24304	0.681507	-0.681507
												BCL2L15	-0.11367	-0.215145	-0.0121952	6.38702	-2.21112	0.0283504	0.175788	-3.71858	1.54744	-1.54744
												BCL2L2	-0.204103	-0.415636	0.00743061	9.43631	-1.90456	0.0585118	0.255354	-4.29904	1.23276	-1.23276
												BCL2L2-PABPN1	0.0219421	-0.096038	0.139922	11.007	0.367109	0.713991	0.86671	-5.9293	0.146307	0.146307
												BCL3	0.57498	0.309669	0.840292	8.02159	4.27782	3.13025e-05	0.00873956	2.19114	4.50442	4.50442
												BCL6	-0.00571778	-0.226028	0.214592	11.0857	-0.0512292	0.959202	0.98262	-5.99167	0.0180897	-0.0180897
												BCL6B	-0.0203522	-0.0937211	0.0530166	7.93163	-0.547552	0.584712	0.791654	-5.85147	0.233058	-0.233058
												BCL7A	-0.296493	-0.497071	-0.0959152	8.19978	-2.91781	0.0039978	0.0662994	-2.07534	2.39818	-2.39818
												BCL7B	0.229152	0.126212	0.332091	9.02609	4.39405	1.94461e-05	0.00806204	2.6172	4.71117	4.71117
												BCL7C	0.080441	-0.0209029	0.181785	9.40658	1.56677	0.119013	0.357105	-4.84249	0.924406	0.924406
												BCL9	0.0196256	-0.0593842	0.0986354	8.04987	0.490307	0.624544	0.818155	-5.87948	0.204437	0.204437
												BCL9L	0.0143463	-0.0812231	0.109916	8.54988	0.296311	0.767352	0.898152	-5.95146	0.115006	0.115006
												BCLAF1	-0.038668	-0.13828	0.0609436	11.3368	-0.766244	0.444585	0.694955	-5.71617	0.352045	-0.352045
												BCLAF1P1	-0.0881844	-0.27588	0.0995109	7.95963	-0.927392	0.355027	0.620569	-5.58787	0.449739	-0.449739
												BCLAF1P2	-0.0824814	-0.279519	0.114556	9.04834	-0.826288	0.409789	0.66713	-5.67119	0.387439	-0.387439
												BCLAF3	-0.0909639	-0.22351	0.0415822	7.0261	-1.35465	0.177312	0.436008	-5.13127	0.751262	-0.751262
												BCO1	-0.0997498	-0.203	0.00350012	5.0745	-1.90699	0.058195	0.254534	-4.29477	1.23511	-1.23511
												BCO2	0.0461404	-0.106338	0.198618	7.11881	0.597309	0.55109	0.770208	-5.82462	0.258778	0.258778
												BCOR	-0.0426402	-0.235932	0.150651	7.93735	-0.435443	0.663789	0.840517	-5.90343	0.17797	-0.17797
												BCORL1	0.0125172	-0.0553281	0.0803625	8.37871	0.364176	0.716175	0.868089	-5.93031	0.144981	0.144981
												BCORP1	-0.0122585	-0.0456385	0.0211214	4.39995	-0.724901	0.469501	0.712703	-5.74518	0.328363	-0.328363
												BCR	-0.38718	-0.595138	-0.179223	9.2953	-3.67505	0.000317763	0.0210421	0.131282	3.4979	-3.4979
												BCRP2	-0.368431	-0.576169	-0.160693	9.19007	-3.50079	0.000591374	0.0272328	-0.415417	3.22814	-3.22814
												BCRP3	-0.247393	-0.432821	-0.0619645	8.56796	-2.63352	0.00922342	0.0990129	-2.78646	2.03511	-2.03511
												BCRP6	-0.247393	-0.432821	-0.0619645	8.56796	-2.63352	0.00922342	0.0990129	-2.78646	2.03511	-2.03511
												BCRP7	-0.247393	-0.432821	-0.0619645	8.56796	-2.63352	0.00922342	0.0990129	-2.78646	2.03511	-2.03511
												BCS1L	0.0196033	-0.0663215	0.105528	8.91445	0.450336	0.653037	0.834815	-5.89721	0.185062	0.185062
												BDH1	0.0170393	-0.135609	0.169688	7.59639	0.220336	0.825872	0.92588	-5.96999	0.0830874	0.0830874
												BDH2	0.146924	-0.0290546	0.322902	10.0079	1.648	0.101184	0.329288	-4.72112	0.994889	0.994889
												BDKRB1	-0.027937	-0.0845134	0.0286393	6.61914	-0.9747	0.331083	0.600236	-5.54561	0.480064	-0.480064
												BDKRB2	0.121365	-0.0286984	0.271428	7.2568	1.59641	0.11224	0.346589	-4.7989	0.949853	0.949853
												BDNF	0.02914	-0.117425	0.175705	6.36432	0.39245	0.695213	0.856019	-5.92022	0.157882	0.157882
												BDNF-AS	0.00712213	-0.0556152	0.0698595	4.64424	0.224083	0.82296	0.924391	-5.9692	0.0846215	0.0846215
												BDP1	-0.0468314	-0.17913	0.0854673	8.89398	-0.698726	0.48567	0.723209	-5.76272	0.313659	-0.313659
												BEAN1	0.0225321	-0.180357	0.225422	6.22304	0.219214	0.826744	0.925936	-5.97022	0.0826288	0.0826288
												BECN1	0.0796562	-0.0320422	0.191355	9.74689	1.40766	0.161042	0.415894	-5.06294	0.79306	0.79306
												BEGAIN	-0.126972	-0.338609	0.0846651	7.83905	-1.18424	0.237956	0.508967	-5.33354	0.623503	-0.623503
												BEND2	0.0135639	-0.0298378	0.0569656	4.84912	0.616883	0.538131	0.760596	-5.81343	0.269112	0.269112
												BEND3	-0.00965241	-0.114128	0.0948227	7.40569	-0.182368	0.85551	0.937711	-5.97721	0.0677751	-0.0677751
												BEND4	-0.381794	-0.5771	-0.186487	4.76494	-3.85867	0.000161212	0.0158915	0.731484	3.7926	-3.7926
												BEND5	-0.0633063	-0.21339	0.0867773	7.67631	-0.832605	0.406226	0.664217	-5.66627	0.391232	-0.391232
												BEND6	-0.24262	-0.500585	0.0153454	7.3756	-1.85648	0.0651014	0.267618	-4.3826	1.18641	-1.18641
												BEND7	-0.310376	-0.526607	-0.0941455	7.60608	-2.83332	0.00515956	0.07558	-2.29356	2.28739	-2.28739
												BEST1	-0.0994596	-0.226519	0.0276001	9.32991	-1.54513	0.12416	0.364989	-4.87383	0.906019	-0.906019
												BEST2	-0.0381548	-0.108437	0.0321278	6.78458	-1.07159	0.285413	0.558577	-5.4526	0.544527	-0.544527
												BEST3	-0.291098	-0.652354	0.0701578	7.57664	-1.59056	0.113552	0.349185	-4.80757	0.944807	-0.944807
												BEST4	0.228581	0.0783323	0.378829	5.28327	3.003	0.00307353	0.0585575	-1.84945	2.51236	2.51236
												BET1	0.270484	0.122244	0.418724	9.06149	3.60164	0.000413936	0.0240128	-0.101775	3.38307	3.38307
												BET1L	0.184603	0.0830448	0.286161	8.78917	3.58797	0.000434629	0.0243367	-0.14472	3.36188	3.36188
												BEX1	-0.424468	-0.789902	-0.0590337	11.5527	-2.29277	0.0230762	0.158969	-3.55023	1.63684	-1.63684
												BEX2	-0.284277	-0.630901	0.0623476	10.3887	-1.61885	0.107317	0.338968	-4.76536	0.96933	-0.96933
												BEX3	-0.073111	-0.16691	0.020688	13.2315	-1.53854	0.12576	0.367164	-4.88327	0.900459	-0.900459
												BEX4	-0.208413	-0.446528	0.0297021	10.3756	-1.72768	0.0858468	0.306052	-4.59632	1.06628	-1.06628
												BEX5	-0.399389	-0.895857	0.0970791	8.58264	-1.58793	0.114146	0.349667	-4.81146	0.942538	-0.942538
												BFAR	0.114117	0.00051233	0.227721	9.26914	1.9828	0.0489871	0.233497	-4.15871	1.30992	1.30992
												BFSP1	0.0361262	-0.0710243	0.143277	6.19264	0.665508	0.50662	0.737856	-5.78406	0.295317	0.295317
												BFSP2	-0.0040071	-0.0613464	0.0533322	5.87567	-0.137944	0.890447	0.95231	-5.98392	0.0503921	-0.0503921
												BFSP2-AS1	0.036084	-0.0148385	0.0870066	6.56198	1.39872	0.163704	0.419611	-5.07464	0.785941	0.785941
												BGLAP	0.0555082	-0.0899719	0.200988	7.24879	0.753146	0.452396	0.700529	-5.72553	0.344482	0.344482
												BGLT3	-0.0615136	-0.128082	0.00505491	7.23869	-1.82401	0.0698919	0.27651	-4.43786	1.15557	-1.15557
												BGN	0.369655	0.124798	0.614512	9.15212	2.97995	0.00330197	0.060994	-1.91114	2.48123	2.48123
												BHLHB9	0.0472994	-0.119818	0.214417	7.44822	0.558676	0.577112	0.786468	-5.84567	0.23874	0.23874
												BHLHE22	-0.0647706	-0.286893	0.157352	6.78262	-0.575587	0.56565	0.77903	-5.83663	0.247453	-0.247453
												BHLHE23	-0.0523579	-0.138745	0.0340287	5.32903	-1.19636	0.233209	0.503264	-5.32004	0.632255	-0.632255
												BHLHE40	0.467613	0.210095	0.725132	10.5591	3.5843	0.000440364	0.0243367	-0.156257	3.35619	3.35619
												BHLHE41	0.171285	-0.0960699	0.438639	10.4656	1.26461	0.207728	0.472831	-5.24147	0.682504	0.682504
												BHMT	-0.115202	-0.207791	-0.0226124	7.62605	-2.45597	0.0150477	0.126207	-3.19666	1.82253	-1.82253
												BHMT2	-0.0535754	-0.232074	0.124923	6.70213	-0.592455	0.554327	0.771977	-5.82735	0.256234	-0.256234
												BICC1	0.216658	-0.0350295	0.468345	6.83666	1.69918	0.0911002	0.313363	-4.64162	1.04048	1.04048
												BICD1	0.217159	0.0641492	0.370168	9.31961	2.80146	0.00567239	0.0784225	-2.37436	2.24623	2.24623
												BICD2	0.00939609	-0.0857456	0.104538	9.26632	0.19494	0.845671	0.93357	-5.97497	0.0727988	0.0727988
												BICDL1	-0.128709	-0.27909	0.0216731	6.55099	-1.68942	0.092957	0.316713	-4.65696	1.03172	-1.03172
												BICDL2	-0.0185244	-0.0959131	0.0588642	6.34362	-0.47249	0.637178	0.825265	-5.88756	0.195739	-0.195739
												BICRA	0.0349258	-0.0589533	0.128805	8.6485	0.73435	0.463739	0.70821	-5.73869	0.333726	0.333726
												BICRAL	-0.0156166	-0.135641	0.104408	8.84238	-0.256827	0.79762	0.911955	-5.96177	0.0982039	-0.0982039
												BID	-0.149575	-0.329892	0.0307423	9.19415	-1.63737	0.103388	0.332864	-4.73735	0.98553	-0.98553
												BIK	-0.00443699	-0.0652791	0.0564051	6.30124	-0.143949	0.88571	0.950145	-5.98312	0.0527086	-0.0527086
												BIN1	-0.0905175	-0.334017	0.152982	10.1773	-0.733771	0.464091	0.708211	-5.73909	0.333397	-0.333397
												BIN2	0.0361355	-0.109846	0.182117	8.12666	0.48861	0.625742	0.818871	-5.88026	0.203604	0.203604
												BIN3	0.127064	0.0342111	0.219916	8.67795	2.70117	0.00760341	0.0901288	-2.62324	2.11899	2.11899
												BIRC2	0.147925	0.0236645	0.272185	10.3917	2.34982	0.0199214	0.145902	-3.42922	1.70068	1.70068
												BIRC3	0.220114	0.03956	0.400668	6.74718	2.40639	0.017174	0.135467	-3.30647	1.76513	1.76513
												BIRC5	0.245021	-0.0191719	0.509214	8.14584	1.83066	0.068888	0.274914	-4.42663	1.16186	1.16186
												BIRC6	-0.0972816	-0.181911	-0.0126522	9.46479	-2.269	0.024515	0.163824	-3.59983	1.61057	-1.61057
												BIRC7	-0.0216197	-0.114889	0.0716496	7.41101	-0.457547	0.647857	0.831802	-5.89412	0.188521	-0.188521
												BISPR	0.179035	0.022256	0.335813	7.23029	2.25411	0.0254557	0.166959	-3.63066	1.59421	1.59421
												BIVM	-0.0199158	-0.177533	0.137701	8.63729	-0.249413	0.80334	0.914528	-5.96354	0.0951008	-0.0951008
												BIVM-ERCC5	-0.0649974	-0.186296	0.0563016	8.05699	-1.0577	0.291679	0.564232	-5.46646	0.535095	-0.535095
												BLACAT1	-0.0540909	-0.179336	0.0711545	5.83499	-0.852487	0.395133	0.655923	-5.65051	0.403256	-0.403256
												BLCAP	-0.122919	-0.260924	0.0150862	10.7569	-1.75812	0.0805118	0.295952	-4.54714	1.09414	-1.09414
												BLID	0.0110788	-0.0811764	0.103334	5.13868	0.237043	0.812907	0.9195	-5.96638	0.0899594	0.0899594
												BLK	-0.0214352	-0.0748764	0.0320059	6.89351	-0.791732	0.429611	0.684212	-5.69749	0.366924	-0.366924
												BLM	0.0911249	-0.1188	0.30105	8.59019	0.856835	0.392732	0.653522	-5.64702	0.405903	0.405903
												BLMH	0.0378099	-0.0889215	0.164541	8.71195	0.588907	0.556699	0.773629	-5.82932	0.25438	0.25438
												BLNK	0.160986	-0.133006	0.454978	7.19604	1.08088	0.281269	0.554751	-5.44322	0.550878	0.550878
												BLOC1S1	0.0170586	-0.104017	0.138134	9.81788	0.278108	0.781264	0.903972	-5.9564	0.107202	0.107202
												BLOC1S2	-0.175089	-0.319777	-0.0304005	10.1292	-2.38864	0.0179976	0.138739	-3.34528	1.74478	-1.74478
												BLOC1S3	0.0668938	-0.0192752	0.153063	7.5087	1.53236	0.127278	0.369683	-4.89211	0.895248	0.895248
												BLOC1S4	0.0775013	-0.0458447	0.200847	8.69678	1.24025	0.216578	0.483917	-5.27	0.664386	0.664386
												BLOC1S5	0.015007	-0.0807692	0.110783	9.49405	0.309287	0.757479	0.892083	-5.94775	0.120629	0.120629
												BLOC1S5-TXNDC5	0.285287	0.0959295	0.474645	10.3632	2.97389	0.00336459	0.0613804	-1.92729	2.47307	2.47307
												BLOC1S6	0.0155133	-0.0990638	0.13009	10.4998	0.267259	0.789591	0.908074	-5.95919	0.102598	0.102598
												BLVRA	0.0342361	-0.0746194	0.143092	10.0863	0.62081	0.535549	0.759168	-5.81114	0.271201	0.271201
												BLVRB	0.107194	-0.0573502	0.271738	9.02195	1.28592	0.200207	0.463254	-5.21606	0.698522	0.698522
												BLZF1	-0.0614545	-0.166389	0.0434795	7.06273	-1.15601	0.249284	0.522858	-5.36447	0.603305	-0.603305
												BMF	0.0138798	-0.0698407	0.0976003	7.19953	0.327247	0.74388	0.884585	-5.94236	0.128497	0.128497
												BMI1	-0.118775	-0.279449	0.0418991	9.88129	-1.45917	0.14635	0.396803	-4.99409	0.834608	-0.834608
												BMP1	0.125562	0.0238308	0.227294	8.63299	2.43629	0.015862	0.129338	-3.24049	1.79964	1.79964
												BMP10	0.0212602	-0.0423098	0.0848303	5.8427	0.660147	0.510046	0.74034	-5.7874	0.292391	0.292391
												BMP15	-0.0556947	-0.122863	0.0114733	5.283	-1.63673	0.103522	0.333095	-4.73832	0.984969	-0.984969
												BMP2	-0.407306	-0.802389	-0.0122228	7.9078	-2.03497	0.0433945	0.219668	-4.06215	1.36257	-1.36257
												BMP2K	-0.0716017	-0.267886	0.124683	9.54375	-0.72005	0.472475	0.714582	-5.74848	0.325621	-0.325621
												BMP3	-0.0199166	-0.0748949	0.0350617	5.81167	-0.715073	0.475537	0.716785	-5.75184	0.322816	-0.322816
												BMP4	-0.0934133	-0.184676	-0.00215104	7.55423	-2.02043	0.0448961	0.224227	-4.08931	1.34779	-1.34779
												BMP5	-0.00715579	-0.174883	0.160572	6.41782	-0.084213	0.932985	0.971811	-5.98956	0.0301252	-0.0301252
												BMP6	-0.0226614	-0.153421	0.108098	6.65371	-0.34209	0.732703	0.877714	-5.93767	0.135072	-0.135072
												BMP7	-0.0677113	-0.292139	0.156716	9.18252	-0.595538	0.552269	0.770654	-5.82562	0.257849	-0.257849
												BMP8A	0.0228192	-0.04214	0.0877785	8.06429	0.693402	0.488996	0.725141	-5.76621	0.310695	0.310695
												BMP8B	0.0140837	-0.190913	0.21908	6.62994	0.135611	0.892288	0.952933	-5.98423	0.0494949	0.0494949
												BMPER	-0.0259442	-0.227759	0.175871	5.0565	-0.253753	0.79999	0.913033	-5.96251	0.0969153	-0.0969153
												BMPR1A	-0.22392	-0.396047	-0.0517928	8.90404	-2.56784	0.0110867	0.107452	-2.94127	1.9552	-1.9552
												BMPR1AP2	-0.145918	-0.331304	0.039469	8.86261	-1.55365	0.122111	0.362301	-4.86153	0.913245	-0.913245
												BMPR1B	-0.112796	-0.37439	0.148798	9.09692	-0.851122	0.395889	0.656294	-5.65161	0.402426	-0.402426
												BMPR2	0.00245432	-0.138365	0.143274	10.1201	0.0344028	0.972596	0.988748	-5.99235	0.0120675	0.0120675
												BMS1	-0.101633	-0.191454	-0.011813	8.85838	-2.2335	0.0268095	0.171176	-3.673	1.57171	-1.57171
												BMS1P1	0.00291126	-0.171672	0.177495	9.61329	0.0329156	0.97378	0.989335	-5.9924	0.0115391	0.0115391
												BMS1P17	-0.0101647	-0.0587759	0.0384465	4.34172	-0.412745	0.680309	0.848899	-5.91251	0.167294	-0.167294
												BMS1P22	-0.0101647	-0.0587759	0.0384465	4.34172	-0.412745	0.680309	0.848899	-5.91251	0.167294	-0.167294
												BMT2	0.0783362	-0.100642	0.257314	8.13157	0.863948	0.388824	0.650437	-5.64127	0.410247	0.410247
												BMX	-0.0531092	-0.133535	0.0273164	6.23619	-1.30347	0.194163	0.456532	-5.19482	0.711834	-0.711834
												BNC1	-0.0223806	-0.0779351	0.0331738	4.92695	-0.795205	0.427594	0.682514	-5.6949	0.368968	-0.368968
												BNC2	0.181469	-0.0622172	0.425156	7.65083	1.46993	0.143413	0.392613	-4.9794	0.84341	0.84341
												BNIP1	0.0238433	-0.0374545	0.0851411	7.86691	0.767798	0.443664	0.694113	-5.71505	0.352946	0.352946
												BNIP2	0.0127903	-0.138427	0.164007	9.04105	0.166957	0.867601	0.942327	-5.97975	0.0616801	0.0616801
												BNIP3	-0.177022	-0.378321	0.0242782	10.9468	-1.73583	0.0843902	0.303573	-4.58323	1.07371	-1.07371
												BNIP3L	0.0673422	-0.0799354	0.21462	11.4494	0.902559	0.368026	0.631848	-5.60922	0.434121	0.434121
												BNIP3P1	-0.0143442	-0.24355	0.214862	9.21716	-0.123531	0.901831	0.957021	-5.9857	0.0448746	-0.0448746
												BNIPL	0.0237103	-0.0193769	0.0667974	4.80014	1.08621	0.278911	0.553044	-5.43781	0.554534	0.554534
												BOC	0.174808	-0.0494188	0.399035	9.13614	1.53886	0.125682	0.367088	-4.88282	0.900726	0.900726
												BOD1	0.187366	0.0488058	0.325926	9.57521	2.66918	0.00833443	0.0938321	-2.70091	2.07912	2.07912
												BOD1L1	-0.0551073	-0.153157	0.0429422	9.22025	-1.1094	0.268811	0.543122	-5.41394	0.570553	-0.570553
												BOD1L2	-0.00979734	-0.0600944	0.0404997	5.59725	-0.384495	0.701088	0.860264	-5.92313	0.154227	-0.154227
												BOK	-0.187089	-0.523138	0.148959	7.90644	-1.09894	0.273336	0.547945	-5.42477	0.563303	-0.563303
												BOLA1	-0.00463101	-0.121346	0.112084	6.95978	-0.0783202	0.937665	0.97381	-5.99001	0.0279524	-0.0279524
												BOLA2	0.0155421	-0.134292	0.165376	9.25521	0.20475	0.83801	0.930325	-5.97312	0.0767508	0.0767508
												BOLA2-SMG1P6	0.0155421	-0.134292	0.165376	9.25521	0.20475	0.83801	0.930325	-5.97312	0.0767508	0.0767508
												BOLA2B	-0.0187301	-0.159737	0.122277	9.12782	-0.262195	0.793486	0.910058	-5.96045	0.100461	-0.100461
												BOLA3	0.0727128	-0.0476166	0.193042	9.84813	1.19279	0.2346	0.504949	-5.32403	0.629672	0.629672
												BOLA3-AS1	-0.038502	-0.128931	0.0519269	6.53866	-0.84043	0.401838	0.660759	-5.66011	0.395949	-0.395949
												BOLL	-0.0219505	-0.0741204	0.0302194	5.54797	-0.83052	0.4074	0.665329	-5.6679	0.389979	-0.389979
												BOP1	-0.0560154	-0.207353	0.0953222	8.07011	-0.730611	0.466015	0.709386	-5.74127	0.331601	-0.331601
												BORA	0.208942	0.0349572	0.382927	6.60218	2.3705	0.018875	0.142363	-3.38466	1.72411	1.72411
												BORCS5	-0.0194512	-0.113406	0.0745036	7.52886	-0.408651	0.683306	0.850911	-5.91409	0.165385	-0.165385
												BORCS6	-0.0136153	-0.078059	0.0508285	7.87265	-0.417033	0.677176	0.847791	-5.91083	0.169298	-0.169298
												BORCS7	-0.230238	-0.426108	-0.0343686	9.74853	-2.32025	0.0215054	0.152267	-3.49228	1.66745	-1.66745
												BORCS7-ASMT	0.0415314	-0.0860828	0.169146	6.69302	0.642396	0.521474	0.7495	-5.79829	0.282767	0.282767
												BORCS8	0.117788	-0.0152982	0.250873	7.85228	1.747	0.0824283	0.300189	-4.56521	1.08392	1.08392
												BORCS8-MEF2B	0.0158587	-0.0703358	0.102053	6.23455	0.363172	0.716924	0.868458	-5.93065	0.144527	0.144527
												BPESC1	-0.011775	-0.0388139	0.0152638	4.15982	-0.859605	0.391207	0.652295	-5.64479	0.407593	-0.407593
												BPGM	-0.0356729	-0.206682	0.135337	8.39776	-0.41176	0.68103	0.849315	-5.91289	0.166834	-0.166834
												BPHL	-0.00170745	-0.0908515	0.0874366	7.81865	-0.0378079	0.969885	0.987781	-5.99223	0.0132798	-0.0132798
												BPI	-0.0082717	-0.0692925	0.0527492	6.87995	-0.267573	0.78935	0.908074	-5.95911	0.10273	-0.10273
												BPIFA1	-0.0426508	-0.115866	0.0305648	6.55872	-1.14987	0.251799	0.525747	-5.37111	0.598946	-0.598946
												BPIFA2	-0.0665654	-0.138827	0.00569635	6.86339	-1.8183	0.0707641	0.27869	-4.44749	1.15019	-1.15019
												BPIFA3	-0.0158311	-0.0853947	0.0537326	7.98061	-0.449214	0.653845	0.83528	-5.89768	0.184525	-0.184525
												BPIFA4P	-0.0251074	-0.100498	0.050283	7.24531	-0.657371	0.511824	0.741721	-5.78913	0.290879	-0.290879
												BPIFB1	-0.0200858	-0.0711751	0.0310035	5.82339	-0.77604	0.438795	0.689901	-5.70906	0.357738	-0.357738
												BPIFB2	-0.00127381	-0.0857828	0.0832352	6.59764	-0.0297528	0.976299	0.990237	-5.99249	0.0104172	-0.0104172
												BPIFB4	0.00270497	-0.0750618	0.0804717	5.91518	0.0686583	0.945342	0.976888	-5.99068	0.0244112	0.0244112
												BPIFB6	-0.0512368	-0.105373	0.00289933	5.06312	-1.86819	0.0634429	0.26426	-4.36244	1.19762	-1.19762
												BPIFB9P	-0.0404878	-0.0875556	0.00658002	5.0845	-1.69795	0.0913315	0.313857	-4.64355	1.03938	-1.03938
												BPIFC	-0.034529	-0.094446	0.0253881	6.4724	-1.13752	0.256909	0.531038	-5.38434	0.59022	-0.59022
												BPNT1	-0.107022	-0.183763	-0.0302797	7.58741	-2.75274	0.00654666	0.0841573	-2.49631	2.18398	-2.18398
												BPTF	-0.0385774	-0.167807	0.0906527	10.1667	-0.589243	0.556474	0.773475	-5.82913	0.254555	-0.254555
												BPTFP1	-0.135814	-0.320201	0.048572	9.01971	-1.45393	0.147795	0.399134	-5.0012	0.830339	-0.830339
												BPY2	-0.0479973	-0.135107	0.0391122	5.42757	-1.08762	0.278291	0.552119	-5.43637	0.555501	-0.555501
												BPY2B	-0.0479973	-0.135107	0.0391122	5.42757	-1.08762	0.278291	0.552119	-5.43637	0.555501	-0.555501
												BPY2C	-0.0479973	-0.135107	0.0391122	5.42757	-1.08762	0.278291	0.552119	-5.43637	0.555501	-0.555501
												BRAF	-0.000695854	-0.115613	0.114221	9.02608	-0.0119525	0.990477	0.996022	-5.99284	0.00415543	-0.00415543
												BRAP	-0.0587882	-0.142452	0.0248756	8.1315	-1.38701	0.167241	0.423025	-5.08987	0.776657	-0.776657
												BRAT1	0.260144	0.126916	0.393372	9.53197	3.85429	0.00016389	0.0158915	0.716878	3.78545	3.78545
												BRCA1	0.175221	0.0129729	0.33747	7.50826	2.13173	0.034454	0.195982	-3.87677	1.46276	1.46276
												BRCA2	0.165366	0.032424	0.298307	5.06414	2.45533	0.0150737	0.126207	-3.19809	1.82178	1.82178
												BRCC3	0.0125244	-0.079776	0.104825	8.46053	0.267842	0.789143	0.907915	-5.95904	0.102844	0.102844
												BRD1	-0.0443867	-0.166803	0.0780294	8.45985	-0.715714	0.475142	0.716717	-5.75141	0.323177	-0.323177
												BRD2	0.121536	-0.0126865	0.255759	10.1673	1.78733	0.075651	0.287785	-4.49918	1.12119	1.12119
												BRD3	-0.0541476	-0.195054	0.0867591	10.5303	-0.75853	0.449176	0.69873	-5.7217	0.347584	-0.347584
												BRD3OS	0.0273466	-0.113486	0.16818	8.91144	0.383287	0.701982	0.860617	-5.92357	0.153674	0.153674
												BRD4	0.13958	-0.011716	0.290875	10.3535	1.82105	0.0703437	0.277583	-4.44287	1.15278	1.15278
												BRD7	0.00806537	-0.109917	0.126047	9.56645	0.134938	0.892819	0.952933	-5.98431	0.0492365	0.0492365
												BRD7P2	0.00806537	-0.109917	0.126047	9.56645	0.134938	0.892819	0.952933	-5.98431	0.0492365	0.0492365
												BRD8	0.041922	-0.063046	0.14689	10.1743	0.788334	0.43159	0.685566	-5.70001	0.364928	0.364928
												BRD9	0.0100442	-0.0681924	0.0882808	9.29024	0.253415	0.800252	0.913034	-5.96259	0.0967734	0.0967734
												BRDT	0.00875638	-0.0396076	0.0571204	4.5469	0.357378	0.721249	0.871001	-5.93262	0.141915	0.141915
												BRF1	0.0208964	-0.0736452	0.115438	7.75502	0.436289	0.663176	0.840135	-5.90308	0.178371	0.178371
												BRF2	-0.0180131	-0.082273	0.0462469	8.60147	-0.553314	0.580769	0.789008	-5.84848	0.235996	-0.235996
												BRI3	0.295651	0.135505	0.455798	10.6118	3.64407	0.000355444	0.0221876	0.0324473	3.44923	3.44923
												BRI3BP	-0.112304	-0.271077	0.0464695	8.79147	-1.39618	0.164465	0.420443	-5.07795	0.783927	-0.783927
												BRICD5	0.0033411	-0.116247	0.122929	7.9431	0.0551477	0.956085	0.981316	-5.99147	0.0195035	0.0195035
												BRINP1	-0.735827	-1.11506	-0.356598	8.57457	-3.83001	0.000179513	0.016656	0.636194	3.7459	-3.7459
												BRINP2	-0.269243	-0.531775	-0.00671198	8.41158	-2.02437	0.0444848	0.222901	-4.08197	1.35179	-1.35179
												BRINP3	-0.620354	-1.01595	-0.224762	7.47739	-3.09541	0.00229618	0.0511673	-1.59787	2.63899	-2.63899
												BRIP1	0.181293	-0.0923565	0.454943	7.12031	1.30771	0.192723	0.454487	-5.18964	0.715067	0.715067
												BRIX1	-0.0271141	-0.162467	0.108239	6.97389	-0.395416	0.693028	0.855048	-5.91911	0.159249	-0.159249
												BRK1	0.0781801	-0.0207093	0.17707	10.7482	1.56053	0.12048	0.359352	-4.85157	0.919087	0.919087
												BRMS1	0.0799186	-0.0197985	0.179636	8.56392	1.58199	0.115496	0.351848	-4.82021	0.937435	0.937435
												BRMS1L	-0.176959	-0.342266	-0.0116516	8.83854	-2.11303	0.036046	0.200171	-3.91323	1.44314	-1.44314
												BROX	-0.0232939	-0.134503	0.0879152	10.3077	-0.413454	0.679791	0.848899	-5.91223	0.167625	-0.167625
												BRPF1	0.0315421	-0.0551758	0.11826	8.30375	0.717972	0.473752	0.715494	-5.74989	0.324449	0.324449
												BRPF3	0.00101216	-0.110014	0.112038	7.85141	0.017995	0.985664	0.994219	-5.99276	0.00627119	0.00627119
												BRS3	-0.018563	-0.0708147	0.0336887	6.1152	-0.70125	0.484098	0.722257	-5.76106	0.315067	-0.315067
												BRSK1	-0.0494163	-0.212395	0.113563	8.09014	-0.598499	0.550297	0.76997	-5.82395	0.259403	-0.259403
												BRSK2	-0.154776	-0.308737	-0.000815431	7.04966	-1.98435	0.0488122	0.233082	-4.15587	1.31147	-1.31147
												BRWD1	-0.127855	-0.308965	0.0532556	8.96522	-1.39347	0.165281	0.420995	-5.08148	0.781778	-0.781778
												BRWD1-AS2	-0.10714	-0.179814	-0.0344665	6.1568	-2.91005	0.00409352	0.0670092	-2.09562	2.3879	-2.3879
												BRWD3	-0.0729044	-0.147072	0.00126317	6.34445	-1.94028	0.0539864	0.245223	-4.23564	1.26772	-1.26772
												BSCL2	0.055605	-0.19466	0.30587	9.92247	0.43857	0.661525	0.83987	-5.90214	0.179454	0.179454
												BSDC1	0.0261504	-0.0635297	0.11583	9.53485	0.575582	0.565652	0.77903	-5.83663	0.24745	0.24745
												BSG	0.226111	0.026347	0.425875	10.436	2.23424	0.0267601	0.171176	-3.6715	1.57251	1.57251
												BSN	-0.358574	-0.695652	-0.0214971	7.75734	-2.09979	0.0372117	0.203511	-3.93887	1.42932	-1.42932
												BSN-DT	-0.0373249	-0.105754	0.0311038	6.28368	-1.07668	0.283137	0.556281	-5.44747	0.548003	-0.548003
												BSND	0.00455509	-0.0491452	0.0582553	7.34127	0.167435	0.867225	0.942237	-5.97967	0.0618681	0.0618681
												BSPRY	-0.0580978	-0.135691	0.0194951	6.92401	-1.47796	0.141253	0.389923	-4.96837	0.850001	-0.850001
												BST1	0.111884	-0.00420733	0.227975	5.76286	1.90236	0.0588005	0.255653	-4.3029	1.23062	1.23062
												BST2	0.4162	0.101403	0.730996	8.66663	2.60974	0.00986273	0.101923	-2.84293	2.006	2.006
												BTAF1	-0.178358	-0.334693	-0.0220225	8.11835	-2.25196	0.0255943	0.167268	-3.6351	1.59186	-1.59186
												BTBD1	0.024091	-0.0956977	0.14388	10.6938	0.396976	0.691879	0.854456	-5.91853	0.15997	0.15997
												BTBD10	0.0764544	-0.0351702	0.188079	9.43516	1.35197	0.178165	0.437205	-5.13466	0.749177	0.749177
												BTBD11	-0.240692	-0.552153	0.0707695	8.00455	-1.5254	0.129004	0.37217	-4.90202	0.889398	-0.889398
												BTBD16	-0.0385606	-0.0994046	0.0222834	5.16958	-1.25098	0.212646	0.478548	-5.25749	0.672344	-0.672344
												BTBD17	-0.126404	-0.305189	0.0523813	6.62008	-1.39558	0.164647	0.420443	-5.07874	0.783446	-0.783446
												BTBD19	0.215313	0.00873544	0.42189	7.42091	2.05737	0.0411653	0.213936	-4.01996	1.38547	1.38547
												BTBD2	0.121085	-0.0304695	0.272639	9.32387	1.57705	0.116627	0.353843	-4.82746	0.933201	0.933201
												BTBD3	-0.0492631	-0.262252	0.163726	9.92266	-0.456551	0.648572	0.831962	-5.89455	0.188042	-0.188042
												BTBD6	0.0423337	-0.0819308	0.166598	9.7086	0.672457	0.502198	0.734746	-5.77968	0.299125	0.299125
												BTBD7	0.028518	-0.100179	0.157215	9.34786	0.437397	0.662374	0.840135	-5.90262	0.178897	0.178897
												BTBD8	-0.455902	-0.871432	-0.0403729	6.72215	-2.16568	0.0317171	0.18798	-3.80978	1.49871	-1.49871
												BTBD9	-0.0745959	-0.161939	0.0127469	8.27441	-1.68583	0.0936484	0.318011	-4.66259	1.0285	-1.0285
												BTC	-0.140353	-0.292446	0.0117397	4.34775	-1.82154	0.0702682	0.277438	-4.44203	1.15324	-1.15324
												BTD	0.0130785	-0.0681641	0.0943211	7.63477	0.31776	0.751054	0.888893	-5.94524	0.124329	0.124329
												BTF3	-0.00616831	-0.10759	0.095253	12.229	-0.12005	0.904584	0.958366	-5.9861	0.043551	-0.043551
												BTF3L4	-0.0248112	-0.146352	0.0967297	9.63609	-0.40295	0.687487	0.853009	-5.91628	0.162736	-0.162736
												BTF3L4P2	0.0540763	-0.10643	0.214583	9.47814	0.665027	0.506927	0.738032	-5.78436	0.295055	0.295055
												BTF3P11	0.0193989	-0.0253294	0.0641272	4.36644	0.85609	0.393143	0.654003	-5.64762	0.40545	0.40545
												BTF3P12	0.0130617	-0.0558518	0.0819752	6.87437	0.374129	0.708771	0.864537	-5.92684	0.149494	0.149494
												BTF3P13	-0.0287003	-0.0825058	0.0251052	4.68625	-1.0529	0.293871	0.566073	-5.47122	0.531844	-0.531844
												BTG1	0.207882	0.0327577	0.383006	11.2421	2.34313	0.0202705	0.14704	-3.44355	1.69314	1.69314
												BTG2	-0.0930141	-0.276477	0.0904487	10.624	-1.00075	0.318358	0.589357	-5.52146	0.497084	-0.497084
												BTG3	0.231528	0.0108296	0.452226	10.5994	2.07076	0.0398802	0.210751	-3.99453	1.39924	1.39924
												BTG3-AS1	0.0581196	-0.0656457	0.181885	5.71027	0.926935	0.355264	0.620882	-5.58827	0.449449	0.449449
												BTG4	-0.0717168	-0.128691	-0.0147421	5.2324	-2.48464	0.0139278	0.121282	-3.1322	1.85612	-1.85612
												BTK	0.0790494	-0.051005	0.209104	7.41853	1.19977	0.231884	0.50188	-5.31621	0.63473	0.63473
												BTLA	-0.00754321	-0.0618511	0.0467646	5.21343	-0.274169	0.784285	0.905801	-5.95742	0.105526	-0.105526
												BTN1A1	-0.0949549	-0.165394	-0.0245161	5.65472	-2.66091	0.00853336	0.0950597	-2.72084	2.06888	-2.06888
												BTN2A1	0.138135	0.0314687	0.244802	8.95281	2.55624	0.011449	0.109388	-2.96825	1.94123	1.94123
												BTN2A2	0.173378	0.0287269	0.318029	7.87615	2.36591	0.019103	0.142899	-3.39458	1.7189	1.7189
												BTN2A3P	8.06021e-05	-0.0628872	0.0630484	6.15699	0.0025267	0.997987	0.99924	-5.99291	0.000875148	0.000875148
												BTN3A1	0.0760129	-0.0703333	0.222359	9.19576	1.02525	0.306688	0.578342	-5.49817	0.513302	0.513302
												BTN3A2	0.127518	-0.0868128	0.341849	10.0834	1.17439	0.241868	0.514115	-5.34442	0.616422	0.616422
												BTN3A3	0.127518	-0.0868128	0.341849	10.0834	1.17439	0.241868	0.514115	-5.34442	0.616422	0.616422
												BTNL2	-0.0585115	-0.123588	0.00656464	5.70136	-1.77478	0.077709	0.291118	-4.51988	1.10953	-1.10953
												BTNL3	-0.029977	-0.0932014	0.0332474	7.99308	-0.935899	0.350642	0.617057	-5.58042	0.455136	-0.455136
												BTNL8	-0.0813651	-0.169927	0.00719705	7.40471	-1.81349	0.0715054	0.280369	-4.45557	1.14566	-1.14566
												BTNL9	-0.0451413	-0.1468	0.0565173	8.5822	-0.876507	0.381981	0.645157	-5.631	0.417958	-0.417958
												BTRC	-0.267442	-0.419427	-0.115457	8.36566	-3.4734	0.00065069	0.0282965	-0.499287	3.18663	-3.18663
												BUB1	0.339936	0.0187	0.661172	7.02119	2.08881	0.0382025	0.206828	-3.96001	1.41791	1.41791
												BUB1B	0.371811	-0.00350551	0.747128	8.23767	1.95546	0.0521542	0.241116	-4.20835	1.28271	1.28271
												BUB3	-0.190845	-0.311214	-0.0704762	10.1338	-3.12962	0.00205774	0.0483042	-1.50301	2.68661	-2.68661
												BUD13	0.0554409	-0.0553125	0.166194	7.90046	0.988095	0.324499	0.593623	-5.53327	0.488787	0.488787
												BUD23	0.225527	0.0889968	0.362057	10.0676	3.26058	0.00134129	0.0391227	-1.13142	2.87248	2.87248
												BUD31	0.305946	0.132589	0.479304	9.80926	3.4836	0.000627981	0.0280565	-0.468125	3.20205	3.20205
												BVES	-0.122678	-0.379648	0.134292	8.10923	-0.942345	0.347342	0.61427	-5.57474	0.459242	-0.459242
												BVES-AS1	-0.035129	-0.0892035	0.0189455	5.15589	-1.28233	0.20146	0.465104	-5.22037	0.695811	-0.695811
												BYSL	0.0410561	-0.082463	0.164575	8.20321	0.656098	0.512641	0.742455	-5.78991	0.290187	0.290187
												BZW1	0.128809	-0.0060117	0.26363	11.0967	1.88588	0.0610022	0.259735	-4.33174	1.21466	1.21466
												BZW1P1	0.199776	-0.0182209	0.417773	10.5526	1.80892	0.0722166	0.281464	-4.46324	1.14136	1.14136
												BZW1P2	0.199776	-0.0182209	0.417773	10.5526	1.80892	0.0722166	0.281464	-4.46324	1.14136	1.14136
												BZW2	0.043231	-0.146351	0.232813	10.1339	0.450115	0.653196	0.83484	-5.8973	0.184956	0.184956
												C10orf143	-0.133723	-0.272221	0.00477551	7.02404	-1.90584	0.0583448	0.254873	-4.29679	1.234	-1.234
												C10orf25	-0.171022	-0.281701	-0.0603429	6.83221	-3.05008	0.00265141	0.0548265	-1.72212	2.57652	-2.57652
												C10orf53	0.0036882	-0.0687071	0.0760835	6.85012	0.100561	0.920017	0.965591	-5.98813	0.0362043	0.0362043
												C10orf55	-0.0110499	-0.0496216	0.0275219	4.3089	-0.565474	0.572491	0.783605	-5.84207	0.242232	-0.242232
												C10orf62	-0.0307478	-0.0912261	0.0297305	7.20128	-1.00355	0.317009	0.588151	-5.51883	0.498928	-0.498928
												C10orf67	0.0156293	-0.0334724	0.0647309	7.38568	0.6283	0.530644	0.754766	-5.80673	0.275197	0.275197
												C10orf71	-0.0154824	-0.0838559	0.0528911	5.9378	-0.446967	0.655463	0.836318	-5.89863	0.183452	-0.183452
												C10orf71-AS1	-0.0668949	-0.13762	0.00383056	5.92569	-1.86699	0.0636104	0.264492	-4.3645	1.19647	-1.19647
												C10orf82	-0.0134046	-0.079277	0.0524678	6.58328	-0.401676	0.688423	0.853615	-5.91676	0.162145	-0.162145
												C10orf88	-0.161291	-0.24942	-0.073162	7.54549	-3.61257	0.000398054	0.0234112	-0.0673209	3.40006	-3.40006
												C10orf90	-0.0925143	-0.213044	0.0280158	7.22245	-1.51509	0.131591	0.375731	-4.91661	0.880772	-0.880772
												C10orf91	-0.00324473	-0.0705971	0.0641077	6.03015	-0.0950934	0.924352	0.967389	-5.98864	0.0341628	-0.0341628
												C10orf95	-0.0377588	-0.107137	0.0316191	5.93689	-1.07429	0.284202	0.557098	-5.44988	0.546373	-0.546373
												C10orf99	-0.0325101	-0.135494	0.070474	7.19716	-0.623122	0.534032	0.757706	-5.80978	0.272433	-0.272433
												C11orf1	-0.115621	-0.254499	0.0232574	8.24243	-1.64334	0.102146	0.330756	-4.72825	0.990779	-0.990779
												C11orf16	-0.0282064	-0.097884	0.0414712	8.34071	-0.79906	0.425361	0.680111	-5.69201	0.371242	-0.371242
												C11orf21	-0.0336128	-0.115706	0.0484804	6.56617	-0.808207	0.420092	0.675353	-5.68509	0.376656	-0.376656
												C11orf24	0.115462	-0.0252452	0.256169	9.07798	1.61975	0.107124	0.33867	-4.76401	0.970112	0.970112
												C11orf40	-0.032917	-0.081365	0.015531	4.53226	-1.34113	0.181654	0.442039	-5.1483	0.740756	-0.740756
												C11orf42	-0.0671584	-0.139359	0.00504206	6.55986	-1.83605	0.068082	0.273346	-4.41747	1.16697	-1.16697
												C11orf44	-0.0412482	-0.0973424	0.0148459	5.24471	-1.45149	0.148472	0.399969	-5.00451	0.828356	-0.828356
												C11orf45	0.106251	0.0243977	0.188104	5.38614	2.56225	0.0112599	0.10847	-2.95428	1.94847	1.94847
												C11orf49	-0.0150081	-0.112764	0.0827474	10.0176	-0.303046	0.762222	0.895137	-5.94956	0.117918	-0.117918
												C11orf52	-0.079099	-0.150796	-0.00740179	5.24116	-2.17768	0.0307964	0.184564	-3.78588	1.5115	-1.5115
												C11orf53	-0.00367009	-0.0674633	0.0601232	7.32591	-0.113561	0.909719	0.961044	-5.98682	0.0410927	-0.0410927
												C11orf54	-0.0578082	-0.195412	0.0797955	8.84208	-0.829249	0.408117	0.665806	-5.66889	0.389215	-0.389215
												C11orf58	0.0963379	0.00110212	0.191574	11.0475	1.99674	0.0474358	0.230133	-4.13314	1.32389	1.32389
												C11orf65	0.0027979	-0.0321271	0.0377229	4.09002	0.158133	0.874538	0.945364	-5.9811	0.0582211	0.0582211
												C11orf68	0.0257768	-0.0511105	0.102664	9.89817	0.661759	0.509015	0.739761	-5.7864	0.29327	0.29327
												C11orf71	-0.196326	-0.326884	-0.065768	8.0478	-2.96824	0.00342389	0.0618312	-1.94231	2.46548	-2.46548
												C11orf72	-0.00536317	-0.0597978	0.0490715	8.28474	-0.194478	0.846032	0.933789	-5.97505	0.0726134	-0.0726134
												C11orf74	-0.0755077	-0.205686	0.0546707	8.21756	-1.14493	0.253836	0.527776	-5.37642	0.595447	-0.595447
												C11orf80	0.0473493	-0.060146	0.154845	6.47178	0.86946	0.385812	0.647916	-5.63678	0.413625	0.413625
												C11orf86	-0.0112144	-0.088426	0.0659973	7.36983	-0.286693	0.774694	0.901298	-5.95411	0.11087	-0.11087
												C11orf87	-0.108711	-0.464211	0.246789	5.00996	-0.603612	0.5469	0.767327	-5.82106	0.262092	-0.262092
												C11orf88	0.106246	-0.0184259	0.230917	4.98534	1.68217	0.0943573	0.319311	-4.66831	1.02522	1.02522
												C11orf94	0.000502906	-0.0544252	0.055431	7.0905	0.0180724	0.985602	0.994219	-5.99275	0.00629839	0.00629839
												C11orf95	0.0570107	-0.105536	0.219557	9.29818	0.692315	0.489677	0.725749	-5.76692	0.310091	0.310091
												C11orf96	-0.196737	-0.509548	0.116075	10.4417	-1.24144	0.216138	0.483285	-5.26861	0.665269	-0.665269
												C11orf97	0.0217166	-0.04953	0.0929633	5.04245	0.601663	0.548193	0.768506	-5.82216	0.261066	0.261066
												C11orf98	-0.0654707	-0.170018	0.0390764	8.89861	-1.23612	0.218106	0.485868	-5.27479	0.661333	-0.661333
												C12orf10	0.0590681	-0.0496444	0.167781	8.97241	1.0725	0.285002	0.558137	-5.45168	0.545153	0.545153
												C12orf29	-0.0894805	-0.251236	0.0722748	9.02938	-1.09193	0.276396	0.550332	-5.43197	0.558469	-0.558469
												C12orf4	-0.044135	-0.159894	0.0716237	8.26331	-0.752584	0.452732	0.700713	-5.72593	0.344158	-0.344158
												C12orf40	-0.0182957	-0.0883962	0.0518047	4.86267	-0.515174	0.607095	0.806269	-5.86769	0.216743	-0.216743
												C12orf42	-0.0527375	-0.121245	0.0157696	5.53827	-1.51953	0.130472	0.374371	-4.91034	0.884484	-0.884484
												C12orf43	-0.0765185	-0.175216	0.0221791	8.81035	-1.53033	0.127778	0.370022	-4.895	0.893542	-0.893542
												C12orf45	-0.201035	-0.311775	-0.0902953	8.42393	-3.58338	0.0004418	0.0243367	-0.159123	3.35477	-3.35477
												C12orf49	0.0824796	-0.0589225	0.223882	10.4065	1.15137	0.251182	0.525049	-5.36949	0.600011	0.600011
												C12orf50	-0.0133339	-0.0796049	0.0529371	4.36475	-0.397154	0.691748	0.854456	-5.91846	0.160052	-0.160052
												C12orf54	-0.0348142	-0.106751	0.0371227	6.46237	-0.955279	0.340782	0.608343	-5.56321	0.467524	-0.467524
												C12orf56	-0.041561	-0.0958537	0.0127316	5.34596	-1.51102	0.132624	0.377344	-4.92234	0.877376	-0.877376
												C12orf57	0.0896075	-0.072259	0.251474	10.6143	1.09273	0.276046	0.550099	-5.43115	0.559018	0.559018
												C12orf60	-0.0823546	-0.150298	-0.0144114	5.54174	-2.39258	0.0178116	0.138154	-3.33668	1.7493	-1.7493
												C12orf65	-0.0374391	-0.133621	0.058743	8.35761	-0.768345	0.443339	0.693807	-5.71465	0.353264	-0.353264
												C12orf66	-0.029468	-0.187671	0.128735	7.47663	-0.367673	0.713571	0.866689	-5.9291	0.146563	-0.146563
												C12orf73	-0.0317251	-0.120627	0.0571767	8.42209	-0.704397	0.482141	0.720734	-5.75897	0.316826	-0.316826
												C12orf74	0.00821353	-0.033028	0.0494551	4.36439	0.393115	0.694723	0.855926	-5.91997	0.158188	0.158188
												C12orf75	0.278926	0.0314473	0.526404	7.26266	2.22473	0.027405	0.1732	-3.69093	1.56217	1.56217
												C12orf76	-0.195957	-0.344085	-0.0478293	8.95922	-2.61126	0.00982078	0.101733	-2.83934	2.00785	-2.00785
												C12orf77	-0.02559	-0.0671908	0.0160107	4.30459	-1.21421	0.226337	0.495437	-5.2999	0.645245	-0.645245
												C12orf80	-0.0200556	-0.0862324	0.0461213	8.07201	-0.598211	0.550489	0.769993	-5.82412	0.259251	-0.259251
												C14orf119	0.13329	0.000763069	0.265818	9.34388	1.98527	0.0487099	0.2328	-4.1542	1.31238	1.31238
												C14orf132	-0.407687	-0.67471	-0.140665	10.5198	-3.01373	0.00297223	0.0579669	-1.82059	2.52692	-2.52692
												C14orf178	-0.0852032	-0.154785	-0.0156218	7.85619	-2.41706	0.0166951	0.133387	-3.28301	1.77741	-1.77741
												C14orf180	-0.00826103	-0.0719989	0.0554769	7.53971	-0.255836	0.798384	0.912504	-5.96201	0.0977881	-0.0977881
												C14orf28	-0.0718674	-0.18171	0.0379751	7.25665	-1.29148	0.198277	0.460723	-5.20936	0.702728	-0.702728
												C14orf39	-0.0160994	-0.0800376	0.0478389	3.96288	-0.497019	0.619812	0.814632	-5.87635	0.20774	-0.20774
												C14orf93	-0.162922	-0.257076	-0.0687681	7.2218	-3.41559	0.000794635	0.0308648	-0.674399	3.09983	-3.09983
												C15orf32	-0.00125658	-0.0332006	0.0306875	4.29953	-0.0776472	0.938199	0.97381	-5.99006	0.0277049	-0.0277049
												C15orf39	0.0427642	-0.0383275	0.123856	7.5672	1.04095	0.299366	0.571087	-5.48296	0.523798	0.523798
												C15orf40	0.11197	-0.0183353	0.242276	8.47563	1.69615	0.0916724	0.314324	-4.64639	1.03776	1.03776
												C15orf41	0.0559148	-0.0366344	0.148464	7.6737	1.19256	0.234691	0.504994	-5.32429	0.629503	0.629503
												C15orf48	0.342406	0.0760697	0.608741	5.52421	2.53768	0.0120505	0.112343	-3.01117	1.919	1.919
												C15orf54	-0.00467665	-0.048558	0.0392047	4.95989	-0.210368	0.83363	0.928672	-5.97201	0.0790266	-0.0790266
												C15orf56	-0.0363965	-0.128376	0.0555831	5.21494	-0.781076	0.435835	0.687984	-5.70537	0.360677	-0.360677
												C15orf61	-0.0104279	-0.15109	0.130234	8.75712	-0.146335	0.883829	0.949429	-5.9828	0.0536317	-0.0536317
												C15orf62	0.00630699	-0.0555696	0.0681836	6.42342	0.201197	0.840783	0.931432	-5.9738	0.075316	0.075316
												C15orf65	0.0423213	-0.136006	0.220649	6.54431	0.468454	0.640055	0.82681	-5.88936	0.193782	0.193782
												C16orf45	-0.0737509	-0.247813	0.100311	9.58268	-0.83635	0.404122	0.662614	-5.66333	0.393487	-0.393487
												C16orf46	-0.0295432	-0.133352	0.0742654	7.25792	-0.561759	0.575014	0.78549	-5.84404	0.240321	-0.240321
												C16orf54	0.107983	-0.0659435	0.281909	4.6488	1.2255	0.222067	0.490215	-5.28701	0.653516	0.653516
												C16orf58	0.131132	0.0356229	0.226641	8.66771	2.71012	0.0074096	0.0890544	-2.60137	2.13021	2.13021
												C16orf70	-0.041324	-0.109407	0.0267589	8.39837	-1.19809	0.232536	0.502465	-5.3181	0.633511	-0.633511
												C16orf71	0.0825656	0.00717943	0.157952	6.14397	2.16189	0.0320137	0.189165	-3.81732	1.49466	1.49466
												C16orf72	0.0348455	-0.0790514	0.148742	10.766	0.603893	0.546713	0.767319	-5.8209	0.26224	0.26224
												C16orf74	0.0829765	-0.00607873	0.172032	7.07976	1.83917	0.0676208	0.272176	-4.41218	1.16992	1.16992
												C16orf78	-0.0105352	-0.0807732	0.0597028	5.75664	-0.296072	0.767534	0.898224	-5.95153	0.114903	-0.114903
												C16orf82	0.00957012	-0.0488783	0.0680186	6.46676	0.323199	0.746939	0.886215	-5.9436	0.126715	0.126715
												C16orf86	-0.0143097	-0.0799379	0.0513185	7.55635	-0.430393	0.66745	0.843008	-5.90549	0.175581	-0.175581
												C16orf87	-0.106377	-0.298356	0.0856011	7.18677	-1.09376	0.275595	0.549572	-5.43009	0.559728	-0.559728
												C16orf89	0.0654896	-0.165513	0.296492	7.6028	0.559604	0.57648	0.786065	-5.84518	0.239216	0.239216
												C16orf91	0.0132799	-0.0689176	0.0954774	8.50492	0.318906	0.750186	0.88849	-5.9449	0.124831	0.124831
												C16orf92	-0.0416514	-0.0997821	0.0164792	6.38678	-1.41433	0.159079	0.413568	-5.05416	0.798386	-0.798386
												C16orf95	0.010291	-0.0560861	0.076668	7.95057	0.306029	0.759954	0.893433	-5.9487	0.119213	0.119213
												C17orf100	-0.157166	-0.286527	-0.0278056	7.062	-2.39818	0.0175505	0.13703	-3.32444	1.75571	-1.75571
												C17orf113	-0.0424883	-0.105938	0.0209614	7.05124	-1.3218	0.187997	0.449148	-5.17234	0.725849	-0.725849
												C17orf47	-0.0298873	-0.0922635	0.032489	5.84035	-0.945785	0.345589	0.612882	-5.57169	0.46144	-0.46144
												C17orf49	0.137772	-0.00801661	0.283561	8.86138	1.86536	0.06384	0.264987	-4.36732	1.19491	1.19491
												C17orf50	-0.0123681	-0.0809203	0.0561841	6.26544	-0.356128	0.722183	0.871542	-5.93304	0.141353	-0.141353
												C17orf51	0.0129699	-0.0822563	0.108196	7.61302	0.268847	0.788371	0.907463	-5.95879	0.103269	0.103269
												C17orf53	-0.0179625	-0.0875625	0.0516374	6.86845	-0.50943	0.611106	0.808672	-5.87046	0.213883	-0.213883
												C17orf58	0.012212	-0.140262	0.164686	8.6515	0.158094	0.874569	0.945364	-5.98111	0.058206	0.058206
												C17orf64	-0.0392599	-0.11392	0.0354004	5.44454	-1.03797	0.300746	0.572717	-5.48586	0.5218	-0.5218
												C17orf67	-0.0481759	-0.120203	0.0238515	7.67091	-1.32025	0.188511	0.449782	-5.17424	0.724664	-0.724664
												C17orf75	0.109201	-0.034135	0.252538	5.85905	1.50382	0.134467	0.38016	-4.93245	0.871384	0.871384
												C17orf77	-0.0134009	-0.0456078	0.018806	4.11947	-0.821317	0.412607	0.668903	-5.67504	0.384464	-0.384464
												C17orf78	-0.0348173	-0.0887324	0.0190978	4.94296	-1.27471	0.204139	0.468521	-5.22948	0.690074	-0.690074
												C17orf80	0.00587764	-0.0973641	0.109119	9.04313	0.112376	0.910657	0.961432	-5.98695	0.0406452	0.0406452
												C17orf82	0.0358849	-0.0202492	0.092019	8.27477	1.26186	0.208714	0.473873	-5.24472	0.680448	0.680448
												C17orf97	-0.021692	-0.161041	0.117657	8.15457	-0.307271	0.75901	0.89286	-5.94834	0.119752	-0.119752
												C17orf98	-0.0338877	-0.0783251	0.0105497	4.30598	-1.50528	0.134091	0.379746	-4.9304	0.872599	-0.872599
												C17orf99	-0.0224336	-0.0790999	0.0342327	5.02915	-0.781447	0.435617	0.687874	-5.7051	0.360895	-0.360895
												C18orf12	-0.0895147	-0.15934	-0.0196893	5.78103	-2.5305	0.0122906	0.113325	-3.02769	1.91043	-1.91043
												C18orf15	0.015978	-0.0619548	0.0939107	6.25177	0.404694	0.686207	0.852332	-5.91561	0.163545	0.163545
												C18orf21	0.120701	-0.0165011	0.257903	8.3881	1.7365	0.0842718	0.303401	-4.58216	1.07432	1.07432
												C18orf25	0.0736196	-0.050497	0.197736	8.76442	1.17082	0.243298	0.515714	-5.34834	0.613862	0.613862
												C18orf32	-0.0738756	-0.20647	0.0587188	10.3492	-1.09977	0.272975	0.547629	-5.42392	0.563877	-0.563877
												C18orf54	0.0919839	-0.0357894	0.219757	7.68402	1.42101	0.157131	0.411192	-5.04532	0.803739	0.803739
												C19orf12	0.133244	0.00762315	0.258866	8.98408	2.09368	0.0377596	0.20548	-3.95063	1.42297	1.42297
												C19orf18	-0.0380276	-0.182961	0.106905	6.57501	-0.517913	0.605187	0.805095	-5.86635	0.218111	-0.218111
												C19orf24	0.120766	-0.002362	0.243893	8.13051	1.93603	0.0545086	0.246347	-4.24324	1.26354	1.26354
												C19orf25	0.0356318	-0.0863287	0.157592	8.19731	0.576691	0.564905	0.778548	-5.83603	0.248025	0.248025
												C19orf33	0.0323733	-0.100667	0.165414	5.10392	0.480318	0.631614	0.822678	-5.88405	0.199549	0.199549
												C19orf44	0.0890941	-0.00229409	0.180482	6.89612	1.92435	0.0559671	0.249896	-4.26405	1.25207	1.25207
												C19orf47	-0.00801132	-0.061617	0.0455943	7.4472	-0.294998	0.768353	0.898742	-5.95183	0.114439	-0.114439
												C19orf48	0.174563	0.0352016	0.313924	8.0757	2.47249	0.014393	0.123422	-3.1596	1.84185	1.84185
												C19orf53	0.112175	0.000703256	0.223648	10.4947	1.98635	0.0485879	0.23263	-4.15221	1.31347	1.31347
												C19orf54	0.0656534	-0.0609774	0.192284	8.36521	1.02339	0.307563	0.57902	-5.49995	0.512065	0.512065
												C19orf57	-0.0149779	-0.0940266	0.0640708	8.20114	-0.374009	0.70886	0.864537	-5.92688	0.149439	-0.149439
												C19orf66	0.151523	0.0367708	0.266275	9.67936	2.60641	0.00995538	0.102193	-2.8508	2.00194	2.00194
												C19orf73	-0.019757	-0.0976387	0.0581247	6.62721	-0.500739	0.617197	0.813133	-5.8746	0.209576	-0.209576
												C19orf81	0.0480762	-0.0223326	0.118485	5.4424	1.34781	0.179498	0.439017	-5.13991	0.74594	0.74594
												C19orf84	-0.0937098	-0.180869	-0.00655025	8.76678	-2.12224	0.0352538	0.197984	-3.8953	1.45279	-1.45279
												C1D	0.0329772	-0.143739	0.209694	8.83592	0.368351	0.713066	0.866564	-5.92887	0.14687	0.14687
												C1DP1	0.0329772	-0.143739	0.209694	8.83592	0.368351	0.713066	0.866564	-5.92887	0.14687	0.14687
												C1GALT1	0.0892453	-0.0658441	0.244335	7.63335	1.13587	0.257597	0.532153	-5.3861	0.589059	0.589059
												C1GALT1C1	0.137447	0.015573	0.259321	8.2894	2.22613	0.0273093	0.172731	-3.68808	1.56369	1.56369
												C1GALT1C1L	0.0699228	-0.102575	0.24242	6.08988	0.800132	0.424742	0.679625	-5.6912	0.371875	0.371875
												C1orf100	-0.0668064	-0.169772	0.0361594	5.65779	-1.28071	0.202026	0.465862	-5.22231	0.694592	-0.694592
												C1orf105	-0.164476	-0.261598	-0.0673528	6.46545	-3.34276	0.00101853	0.0343511	-0.891422	2.99203	-2.99203
												C1orf109	0.0858597	-0.0683475	0.240067	7.83471	1.09903	0.273296	0.547915	-5.42468	0.563367	0.563367
												C1orf112	0.100312	-0.0592803	0.259905	6.22697	1.2407	0.216412	0.483667	-5.26948	0.664718	0.664718
[truncated: 19,528 more rows]

## Sheet: Supplimentary-1B
TRANSPATH PATHWAY ENRICHMENT
ID	Title	Group size	Expected hits	Nominal P-value	ES	Rank at max	NES	FDR	Number of hits
CH000001004	Aurora-A cell cycle regulation	68	67.2625	0	0.42261	8347	4.13803	0	68
CH000001003	Aurora-A activation, substrates and degradation	67	66.2733	0	0.419728	8347	3.97096	0	67
CH000003553	Aurora-B cell cycle regulation	55	54.4035	0	0.442043	7734	3.87984	0	55
CH000000919	cyclosome regulatory network	77	76.1649	0	0.348952	7336	3.72843	0	77
CH000000918	cyclosome regulation	75	74.1866	0	0.353959	7336	3.67839	0	75
CH000004198	Metaphase to Anaphase transition	52	51.436	0	0.430414	7734	3.647	0	52
CH000000694	G2/M phase (cyclin B:Cdk1)	66	65.2842	0	0.374627	6641	3.58753	0	66
CH000000879	Caspase network	83	82.0998	0	0.333518	8414	3.52317	0	83
CH000000711	TGFbeta pathway	153	151.341	0	0.2327	8431	3.3461	0	151
CH000004209	securin degradation	39	38.577	0	0.441413	7630	3.28712	0	39
CH000004706	FA network	30	29.6746	0	0.503636	8552	3.24028	0	30
CH000004525	diacyl lipopeptide, TLR2	43	42.5336	0	0.400008	7931	3.206	0	43
CH000004521	TLR2-mediated signaling	64	63.3059	0	0.333587	8317	3.12032	0	64
CH000004716	ID complex ubiquitination	20	19.7831	0	0.582587	7925	3.11212	0	20
CH000003886	cyclinB1 ubiquitination ---> anaphase onset	38	37.5879	0	0.431148	7734	3.06787	0	38
CH000000994	EGF ---> actin polymerization	14	13.8482	0	0.639665	4693	2.93881	0.000250216	14
CH000004205	cyclosome ---> Nek2A	34	33.6312	0	0.411097	7630	2.92321	0.000222414	34
CH000001002	Plk1 cell cycle regulation	52	51.436	0	0.342071	7147	2.91978	0.000210708	52
CH000000747	E2F network	127	125.623	0	0.220521	6641	2.90056	0.000200173	127
CH000004207	Fzr1 ---> cyclin B1 degradation	34	33.6312	0	0.411097	7630	2.814	0.000190641	34
CH000004577	Rac1 ---p65PAK---> Arp2/3 complex	21	20.7722	0	0.514298	7395	2.79585	0.000272963	21
CH000000946	Plk1, Cdk1 ---/ Wee1	31	30.6638	0	0.420541	7630	2.7857	0.000348126	31
CH000000691	G1 phase (Cdk2)	80	79.1323	0	0.267655	6641	2.78189	0.000333621	80
CH000000608	SLP-65 ---/ Raf-1	12	11.8698	0	0.657019	7395	2.76981	0.000320276	12
CH000003555	NIPA ---> cyclin B1	25	24.7289	0	0.44626	7630	2.71234	0.000384947	25
CH000000692	S phase (Cdk2)	56	55.3926	0	0.299583	6641	2.71179	0.00037069	56
CH000000882	Smac ---/ cIAP-2	25	24.7289	0	0.449864	8414	2.68872	0.000357451	25
CH000000881	Smac ---/ cIAP-1	25	24.7289	0	0.449864	8414	2.67937	0.000345125	25
CH000000679	release of active TGFbeta	13	12.859	0	0.631438	4356	2.67052	0.000400345	12
CH000000667	VHL ---> HIF-1alpha degradation	59	58.3601	0	0.29001	7139	2.65669	0.000387431	58
CH000004201	Cdc20 ubiquitination	22	21.7614	0	0.476576	8347	2.64433	0.000375324	22
CH000004666	NF-kappaB ---> genes encoding endothelial adhesion molecules	31	30.6638	0	0.388237	7630	2.63269	0.000485267	31
CH000000682	Smurf-1 ---/ Smad7, TGFbetaR-I	28	27.6963	0	0.424052	7630	2.59598	0.000824241	27
CH000000822	c-Jun degradation	24	23.7397	0	0.437897	7630	2.59434	0.000800691	24
CH000004150	Cul3 ---/ Nrf2	24	23.7397	0	0.437897	7630	2.56695	0.00105647	24
CH000004202	Cdc20 deubiquitination	23	22.7505	0	0.439008	8347	2.53439	0.00183942	23
CH000000683	cyclosome ---/ SnoN	37	36.5987	0	0.355829	12141	2.53257	0.00189637	37
CH000000333	CH000000333	13	12.859	0	0.58008	7395	2.52693	0.0019504	13
CH000004446	TNFR1 signaling	40	39.5662	0	0.332384	7931	2.51917	0.00200173	40
CH000000121	p105 ---> p50	26	25.718	0	0.415475	7630	2.51464	0.00209937	26
CH000004717	FA core complex formation	14	13.8482	0	0.560982	7925	2.49428	0.00247833	14
CH000004242	HMGCR ---> 26S proteasome	28	27.6963	0	0.396258	7630	2.48288	0.00274656	28
CH000000573	phosphorylation and ubiquitination of beta-catenin	29	28.6855	0	0.377896	8211	2.48262	0.00268413	29
CH000003582	CENP-E ---> BubR1	7	6.92408	0	0.760445	2088	2.47499	0.00262449	7
CH000004587	WAVE2 ---> Arp2/3 complex	27	26.7072	0	0.397893	7395	2.46577	0.0027415	27
CH000003882	Plk1 ---> Emi1	23	22.7505	0	0.428809	7630	2.46516	0.00268317	23
CH000000899	Apo2L ---Caspase-8---> Caspase-3	5	4.94577	0	0.866391	2882	2.44465	0.00333621	5
CH000000722	EGF pathway	134	132.547	0	0.18192	6393	2.44456	0.00326813	134
CH000000871	EGF ---> PLD2	12	11.8698	0	0.57364	7395	2.43309	0.00360311	12
CH000003565	Plk1 ---> Bub1	5	4.94577	0	0.865927	2892	2.42226	0.00380721	5
CH000000693	G2/M phase (cyclin A:Cdk1)	22	21.7614	0	0.419362	6641	2.4127	0.00408044	22
CH000000864	Htt degradation	25	24.7289	0.001	0.406214	7630	2.41172	0.00404122	25
CH000000772	TNF-alpha pathway	97	95.9479	0	0.210491	7630	2.40334	0.00426294	94
CH000000715	HIF-1alpha pathway	89	88.0347	0	0.220245	6779	2.40132	0.00429461	88
CH000000907	Cdk1, Plk1 ---/ cyclin B	5	4.94577	0	0.865927	2892	2.39186	0.00439665	5
CH000004437	lymphotoxin B receptor signaling	37	36.5987	0	0.321971	7630	2.38604	0.00460046	37
CH000000612	BCR ---MLK3---> c-Jun	17	16.8156	0.001	0.480562	7395	2.37715	0.00479724	17
CH000000872	Unc18-1 ---/ PLD2	12	11.8698	0	0.57364	7395	2.35384	0.00553811	12
CH000004590	tubulin ---restin, IQGAP1---> actin	31	30.6638	0	0.358096	8973	2.33396	0.00655404	31
CH000003760	IMP ---> GTP	10	9.89154	0	0.597092	6530	2.33029	0.0065771	10
CH000004471	IFNgamma signaling	29	28.6855	0	0.370493	11341	2.32614	0.00675583	29
CH000000588	LAT ---> cofilin	16	15.8265	0	0.469502	7395	2.32256	0.00695985	16
CH000000851	JNK pathway	84	83.0889	0	0.217275	7646	2.32073	0.00697572	84
CH000000904	Jagged1 ---Notch1---> NICD1	16	15.8265	0	0.47912	7188	2.31679	0.00694717	16
CH000000838	p53 degradation	26	25.718	0	0.376967	7630	2.29094	0.00823568	26
CH000004434	NIK degradation	25	24.7289	0.001	0.376418	8271	2.28616	0.00854258	25
CH000000710	p53 pathway	129	127.601	0.002	0.174145	6786	2.27775	0.00906337	127
CH000004609	EphA4 ---> Rho activation	11	10.8807	0	0.566033	7395	2.27744	0.00896664	11
CH000000017	arachidonic acid ---> NADPH oxidase	9	8.90239	0	0.656897	7395	2.27046	0.00949468	8
CH000000685	Smad3 nuclear translocation	12	11.8698	0	0.530761	8318	2.26496	0.0100353	12
CH000003701	interconversion and degradation of pyrimidine nucleotides and bases	85	84.0781	0.002	0.204471	10310	2.26154	0.010114	85
CH000000985	E1 ---PIRH2---/ p53	26	25.718	0.001	0.376967	7630	2.25955	0.0101386	26
CH000000947	parkin associated pathways	66	65.2842	0	0.229663	8122	2.25616	0.0102909	66
CH000004726	ID complex deubiquitylation	7	6.92408	0	0.704658	6366	2.24778	0.0109208	7
CH000003412	Akt-1 ---Mdm2---> AR	25	24.7289	0	0.366167	7630	2.22873	0.0126859	25
CH000000717	p53 ---> HIF-1alpha degradation	23	22.7505	0	0.385284	7630	2.22357	0.0130977	23
CH000000758	stress-associated pathways	120	118.698	0	0.170886	6750	2.20956	0.014183	120
CH000000583	Siah ---> beta-catenin	27	26.7072	0.004	0.349885	7630	2.20261	0.0149768	27
CH000000793	IL-8 ---> superoxide	15	14.8373	0.002	0.467041	10050	2.19861	0.0151321	15
CH000004433	LT-betaR ---NIK, RelB---> CCL19	34	33.6312	0	0.322722	7630	2.19251	0.0156606	34
CH000003887	Usp44 ---> Cdc20	20	19.7831	0	0.412836	8347	2.18627	0.0163397	20
CH000000697	IL-1beta ---> p50:RelA	35	34.6204	0.001	0.317998	7931	2.18043	0.0169572	35
CH000003879	EGF ---> PLCgamma	6	5.93492	0.001	0.711731	6213	2.17975	0.0168555	6
CH000000769	wnt pathway	57	56.3818	0	0.241448	4813	2.17885	0.0168235	56
CH000003912	neurotrophic signaling	99	97.9262	0	0.188182	9454	2.17181	0.0173483	99
CH000004283	ER-alpha ---CHIP---> 26S proteasome	29	28.6855	0.001	0.33585	7630	2.16341	0.0181915	29
CH000000331	CH000000331	5	4.94577	0.001	0.789161	4545	2.15438	0.0190272	5
CH000003697	2'-deoxycytidine-5'-phosphate ---> 2'-deoxyuridine 5'-phosphate	9	8.90239	0	0.585949	6530	2.14964	0.0193358	9
CH000000898	Apo2L pathway	20	19.7831	0.001	0.395195	4419	2.13536	0.0209347	20
CH000000587	LAT ---> Ras	16	15.8265	0	0.458258	7637	2.13437	0.0208634	16
CH000003562	Plk1 ---> INCENP	6	5.93492	0	0.699254	2892	2.13269	0.0209977	6
CH000000903	Jagged1,2 ---> JICD1,2	13	12.859	0.001	0.490775	4347	2.12938	0.021372	13
CH000000130	CH000000130	3	2.96746	0	0.959043	885	2.11844	0.0230999	3
CH000003567	IL-1 beta ---> IRAK1	7	6.92408	0.002	0.658406	4285	2.11335	0.0237829	7
CH000000876	Src ---> Rap2B	12	11.8698	0.004	0.493063	3745	2.10995	0.0241188	12
CH000000134	CH000000134	3	2.96746	0.002	0.959043	885	2.10761	0.0244288	3
CH000000611	BCR ---> p38	17	16.8156	0.001	0.421692	7395	2.10425	0.0247906	17
CH000004515	p53 ---Mdm2, YY1---> degradation	22	21.7614	0	0.373397	7630	2.10049	0.0253361	22
CH000000466	EDAR ---> NF-kappaB	14	13.8482	0.002	0.465786	9974	2.09714	0.0257392	14
CH000000732	EGF ---> SHIP1	4	3.95662	0	0.826275	3745	2.09395	0.0259663	4
CH000004472	IFNgamma ---> Rap1	19	18.7939	0.003	0.393843	7395	2.09051	0.026319	19
CH000004578	cofilin-1 degradation	22	21.7614	0.002	0.373397	7630	2.07549	0.0294015	22
CH000003585	lactose metabolism	8	7.91323	0.001	0.593497	8760	2.06935	0.0305354	8
CH000004634	TGFbetaR-I ---> ERK	25	24.7289	0.001	0.344888	9631	2.06193	0.0321719	24
CH000004670	oxygen independent HIF-1alpha degradation	55	54.4035	0.002	0.237388	7823	2.06147	0.0319919	55
CH000000741	Epo pathway	32	31.6529	0	0.301794	8317	2.05443	0.0335334	32
CH000003692	cytidine 5'-phosphate ---> RNA-P-C	40	39.5662	0.002	0.274735	7555	2.05436	0.0332568	40
CH000003568	glucose-1-p ---> UDP-D-galactose	8	7.91323	0.002	0.593497	8760	2.04908	0.0344123	8
CH000000955	E1 ---/ alpha-synuclein	24	23.7397	0.001	0.354471	7630	2.04835	0.0343227	24
CH000000624	EGF ---/ AKT	8	7.91323	0.003	0.576335	3745	2.04102	0.0360482	8
CH000000941	PAK1 ---> STAT5A	9	8.90239	0.002	0.54577	7395	2.04026	0.0359293	9
CH000000920	Fas ---/ Cdc42	7	6.92408	0.001	0.630918	1800	2.03739	0.0362498	7
CH000000501	NDKA ---/ Rac1	9	8.90239	0.002	0.54577	7395	2.03458	0.0363785	9
CH000000709	ATM ---/ Cdc25	5	4.94577	0.003	0.727627	5870	2.03395	0.036228	5
CH000004642	TGFbetaR-I ---pak2, ERK1---> SMAD7, SERPINE1	24	23.7397	0.002	0.353353	8317	2.03367	0.035966	23
CH000004633	FKBP12 ---/ TGFbetaR-I	4	3.95662	0.001	0.91479	1838	2.03301	0.0359019	3
CH000000914	Nrdp1 ---/ apollon	26	25.718	0.005	0.338459	7630	2.03032	0.0361752	26
CH000004520	TLR2 ---> IRAK-2	5	4.94577	0.002	0.721191	1701	2.02578	0.0366458	5
CH000001007	beta-catenin ---/ KAI1	4	3.95662	0	0.779558	4751	2.01634	0.0388863	4
CH000000016	fMLP ---> NADPH oxidase	10	9.89154	0.003	0.54577	7395	2.01495	0.0389721	9
CH000000894	Rac1 ---> golgin-160	9	8.90239	0.002	0.54577	7395	2.01195	0.0396525	9
CH000004658	E-cadherin ---/ HMOX1, NQO1	4	3.95662	0.004	0.789124	4545	2.0012	0.0418858	4
CH000000755	TLR4 pathway	63	62.3167	0.007	0.213025	7931	1.99705	0.0426338	62
CH000000724	EGF ---> ERK	19	18.7939	0.001	0.369446	7920	1.99403	0.0426544	19
CH000000891	Caspase-6 ---> Caspase-3	4	3.95662	0.001	0.792839	4465	1.9928	0.042796	4
CH000004519	TLR9 ---IRAK1---> MKK3, MKK4	17	16.8156	0.002	0.396786	7931	1.99091	0.0430952	17
CH000004149	Nrf2 pathway	41	40.5553	0.004	0.262794	6433	1.98193	0.0455213	41
CH000000590	LAT ---> p50:RelA	21	20.7722	0.002	0.360705	7623	1.98158	0.0453391	21
CH000004512	IL-5 ---Lyn--->ERK1	24	23.7397	0.001	0.340991	7920	1.98002	0.0453157	24
CH000000617	Rac1 ---MLK3---> c-Jun	9	8.90239	0.004	0.54577	7395	1.97428	0.0469701	9
CH000000332	CH000000332	9	8.90239	0.004	0.54577	7395	1.97337	0.0470756	9
CH000000170	CH000000170	4	3.95662	0.002	0.891061	2349	1.9698	0.0480136	3
CH000004506	IL-5 pathway	32	31.6529	0.004	0.288957	7920	1.96418	0.0492563	32
CH000000601	Delta ---Notch1---> NICD1	16	15.8265	0.004	0.416574	7188	1.96245	0.0489946	16
CH000000877	Src ---> Rac1	13	12.859	0.001	0.441773	3745	1.95855	0.0500973	13
CH000004659	TGFbeta1 ---ALK-1---> Smad1	6	5.93492	0.003	0.681345	2559	1.95458	0.0511179	5
CH000000150	angiotensin II ---> PLA2	3	2.96746	0.002	0.901741	2119	1.95318	0.0512842	3
CH000000146	CH000000146	3	2.96746	0.003	0.872254	2754	1.95315	0.0509579	3
CH000000176	CH000000176	4	3.95662	0	0.891061	2349	1.94868	0.0522819	3
CH000003419	DISC ---> c-FLIP-L ---> Caspase-8	5	4.94577	0.003	0.688682	2401	1.9483	0.052058	5
CH000004252	NGF ---TrkA---> Elk-1	22	21.7614	0.003	0.344348	9234	1.94814	0.0517589	22
CH000000654	insulin ---> glucose uptake	19	18.7939	0.003	0.363033	8058	1.93301	0.0565744	19
CH000003415	Mdm2 ---> p/CAF	23	22.7505	0.009	0.34176	7630	1.92053	0.0609953	23
CH000004568	EGF ---> Rac activation	12	11.8698	0.004	0.45579	8137	1.91689	0.0619649	12
CH000004588	beta-glucan ---> AKT-1	22	21.7614	0.001	0.341467	8317	1.91688	0.0615877	22
CH000000750	insulin pathway	90	89.0239	0.003	0.17103	8058	1.90862	0.0639193	90
CH000000910	Fas ---/ PRK2	7	6.92408	0.002	0.580525	2885	1.90682	0.0643377	7
CH000004558	mannan, Dectin2	9	8.90239	0.006	0.537111	9974	1.9064	0.0641041	8
CH000004628	TGFbeta1 ---Smad7, TAK1---> p38	17	16.8156	0.006	0.392221	6366	1.905	0.0642372	16
CH000000699	IL-1beta ---> Elk-1	20	19.7831	0.006	0.358886	8431	1.90483	0.0638985	20
CH000000615	Rac1 ---> NUDEL, amphiphysin I	11	10.8807	0.008	0.475078	7395	1.90443	0.0636477	11
CH000000541	PTP-PEST ---/ paxillin	3	2.96746	0.003	0.847411	3289	1.90191	0.0644008	3
CH000000645	PDGF B ---SHP-2---> Ras; PDGF B ---RasGAP---/ Ras	14	13.8482	0.006	0.431412	7637	1.89949	0.0649436	14
CH000000646	PDGF B---/ Ras	14	13.8482	0.005	0.431412	7637	1.8983	0.065009	14
CH000000495	Tiam1 ---> p38alpha	11	10.8807	0.007	0.475078	7395	1.89742	0.0649332	11
CH000004199	Emi1 ---Cdc20---/ cyclosome	13	12.859	0.006	0.437956	12111	1.89337	0.0662083	13
CH000003770	interconversions and degradations of purine ribonucleotides	41	40.5553	0.006	0.24949	6719	1.89158	0.0665198	41
CH000004467	p50:RelA-p65 ---> IL8	55	54.4035	0.005	0.223204	7630	1.89008	0.0666897	52
CH000000313	CH000000313	5	4.94577	0.002	0.682227	2540	1.88496	0.0679677	5
CH000004197	Emi1 ---Fzr1---/ cyclosome	13	12.859	0.008	0.437956	12111	1.88165	0.0692575	13
CH000001001	Plk1 activation and substrates	24	23.7397	0.006	0.323417	3811	1.88112	0.0690933	24
CH000000533	GEFT ---> SAP-1	9	8.90239	0.007	0.519294	7965	1.86895	0.073708	9
CH000000020	fMLP ---> NFkappaB	8	7.91323	0.005	0.537111	9974	1.85909	0.0771157	8
CH000004605	Smad7 ---YAP---/ TGFbeta1 signaling	8	7.91323	0.008	0.566592	3185	1.85848	0.0770012	7
CH000000917	Apo2L ---Caspase-10---> Caspase-3	5	4.94577	0.007	0.666345	2882	1.85697	0.0769373	5
CH000003934	non-amyloidogenic epsilon cleavage	8	7.91323	0.006	0.524361	4864	1.85266	0.0786882	8
CH000000063	Hck ---> RhoA	3	2.96746	0.005	0.841282	3421	1.85126	0.0787028	3
CH000004303	NGF ---p75NTR---> p50:RelA-p65	12	11.8698	0.005	0.43288	10425	1.84956	0.0791314	12
CH000000965	inhibitory phosphorylation of TGFbetaR-II	6	5.93492	0.005	0.652273	3185	1.84726	0.0799852	5
CH000000771	Fas pathway	31	30.6638	0.008	0.2791	4419	1.84277	0.081758	31
CH000004652	AT1A ---beta-arrestin2---> bad	8	7.91323	0.006	0.530876	7416	1.8427	0.0813759	8
CH000004517	TLR9 pathway	32	31.6529	0.003	0.279419	6779	1.84112	0.0816581	32
CH000000730	SHP-1 ---/ ErbB1	3	2.96746	0.007	0.826236	3745	1.84049	0.0816397	3
CH000004200	MAD2 ---Cdc20---> cyclosome	16	15.8265	0.01	0.37547	12111	1.83994	0.0814989	16
CH000003564	Bub1 ---> APC7	6	5.93492	0.008	0.598628	1469	1.83752	0.0822334	6
CH000000821	TBK1:TRIF:IKK-i ---> p50:RelA	18	17.8048	0.004	0.367507	11095	1.83603	0.0826572	17
CH000000752	Rac1 pathway	74	73.1974	0.006	0.184314	7395	1.83516	0.0828051	74
CH000000569	LPS ---> NF-kappaB	31	30.6638	0.006	0.277328	7931	1.83027	0.0847932	31
CH000000690	G1 phase (Cdk6)	33	32.6421	0.005	0.267829	6641	1.82852	0.0853771	33
CH000004595	E-cadherin ---Eplin---> actin	9	8.90239	0.011	0.501974	10731	1.82819	0.0852022	9
CH000004536	IL-6 signaling	8	7.91323	0.009	0.533047	4677	1.82609	0.0859165	8
CH000000878	Src ---/ RhoA	14	13.8482	0.006	0.397808	3745	1.82163	0.0873925	14
CH000000059	Pyk2 ---/ AR	3	2.96746	0.007	0.823822	3797	1.81964	0.0875731	3
CH000004479	RIP deubiquitination	7	6.92408	0.007	0.561755	6366	1.81844	0.0878161	7
CH000004563	TLR8 ---Btk---> NF-kappaB	6	5.93492	0.008	0.601632	4994	1.81779	0.0877695	6
CH000004247	ER-alpha (NR3A1) ubiquitination	7	6.92408	0.005	0.561755	6366	1.81544	0.0885907	7
CH000000532	GEFT ---> Elk-1	9	8.90239	0.009	0.497649	8431	1.81389	0.0890436	9
CH000000927	non-amyloidogenic APP pathway	8	7.91323	0.005	0.524361	4864	1.8137	0.0887464	8
CH000000901	Epo ---> ERK1	17	16.8156	0.011	0.362822	7395	1.81277	0.0889218	17
CH000000586	ZAP-70 ---> Elk-1	31	30.6638	0.008	0.269707	10874	1.80995	0.0901151	31
CH000004351	TNF-alpha ---FADD---> caspase-3	8	7.91323	0.003	0.509162	2499	1.809	0.090357	8
CH000000932	PRL ---> Raf-1	20	19.7831	0.008	0.345446	10874	1.80387	0.0924945	20
CH000004104	BDNF ---trkB---> MAPK cascade	20	19.7831	0.012	0.330402	7967	1.80292	0.0922714	20
CH000004438	Ubc5C ubiquitin conjugation	4	3.95662	0.009	0.70456	6366	1.80144	0.0926527	4
CH000003622	UDP-glucose ---> D-glucose	9	8.90239	0.006	0.485154	8700	1.79982	0.0931029	9
CH000004254	HMGCR regulation	64	63.3059	0.006	0.188442	7732	1.79854	0.0933147	64
CH000000789	IL-8 ---> ERK2	26	25.718	0.016	0.290986	10308	1.79842	0.0929501	26
CH000000470	RANKL ---> p38	22	21.7614	0.006	0.317578	8831	1.79594	0.0930626	22
CH000003780	acidic hexose derivatives and inositol	18	17.8048	0.009	0.361054	8700	1.78986	0.0956703	17
CH000000794	neurotensin pathway	49	48.4685	0.006	0.220646	3610	1.78976	0.0952874	49
CH000000589	LAT ---> MLC	21	20.7722	0.01	0.323636	7395	1.78743	0.0962221	21
CH000004683	PGE2 ---> CCND1	3	2.96746	0.001	0.797446	4365	1.78656	0.0963342	3
CH000004608	EphA/ephrin signaling	16	15.8265	0.01	0.375482	4034	1.78578	0.0964366	16
CH000004697	CCR2 signaling	21	20.7722	0.008	0.323275	9454	1.78427	0.0969506	21
CH000000890	Fas ---/ NuMA	4	3.95662	0.004	0.709042	885	1.7824	0.0976312	4
CH000004273	eicosapentaenoic acid ---> PGF3alpha	2	1.97831	0.003	0.964989	756	1.78129	0.098008	2
CH000000609	BCR ---> cytoskeletal reorganization	25	24.7289	0.006	0.296998	7395	1.78074	0.0978811	25
CH000000319	CH000000319	3	2.96746	0.009	0.801161	4285	1.77893	0.09849	3
CH000000767	Notch pathway	32	31.6529	0.008	0.266737	9744	1.77833	0.0983874	32
CH000000003	Rac1 ---/ cofilin	10	9.89154	0.006	0.456865	7395	1.77774	0.0983024	10
CH000000790	IL-8 ---> IP3	28	27.6963	0.006	0.284784	10797	1.77026	0.102338	28
CH000000777	poly(I:C) ---> IRF-3	3	2.96746	0.003	0.953891	995	1.76969	0.102238	2
CH000004600	mammalian Hippo network	52	51.436	0.007	0.209177	4374	1.76781	0.103056	51
CH000000744	tuberin ---> Rheb	10	9.89154	0.009	0.456865	7395	1.7672	0.102986	10
CH000000916	Apo2L ---> Caspase-7	5	4.94577	0.01	0.626638	3737	1.76667	0.10281	5
CH000000125	CH000000125	3	2.96746	0.001	0.954495	982	1.76662	0.102448	2
CH000003698	2'-deoxyuridine 5'-phosphate ---> deoxythymidine 5'-triphosphate	27	26.7072	0.011	0.284709	9032	1.76551	0.102747	27
CH000000751	T-cell antigen receptor pathway	90	89.0239	0.012	0.157015	10991	1.76185	0.10434	90
CH000000613	Rac1 ---/ cofilin	10	9.89154	0.009	0.456865	7395	1.7617	0.104009	10
CH000003652	pentose phosphate pathway	13	12.859	0.01	0.422536	7058	1.76162	0.103609	12
CH000000859	p38alpha ---> MITF	3	2.96746	0.007	0.786348	4604	1.76101	0.103579	3
CH000003416	Caspase-8 ---> Caspase-3	2	1.97831	0.001	0.958999	885	1.76048	0.103454	2
CH000003654	glycogen degradation	9	8.90239	0.009	0.485154	8700	1.75921	0.103837	9
CH000000538	Rac1 ---/ PAK1	10	9.89154	0.007	0.456865	7395	1.7563	0.104661	10
CH000000804	sortilin pathway	6	5.93492	0.008	0.580671	9035	1.75608	0.104464	6
CH000000656	insulin ---Shc---> MAPK cascade	34	33.6312	0.007	0.25032	7920	1.75599	0.104121	34
CH000004676	prostanoid receptor signaling	33	32.6421	0.011	0.258421	9454	1.75491	0.10399	33
CH000000607	BCR ---> ERK	30	29.6746	0.014	0.265982	7920	1.7496	0.106198	30
CH000000729	EGF ---> STAT3	5	4.94577	0.012	0.626267	3745	1.7462	0.107843	5
CH000000668	FasL ---> Caspase-3	6	5.93492	0.009	0.583256	1800	1.74413	0.108728	6
CH000003554	borealin ---> Aurora-B	4	3.95662	0.01	0.687982	6723	1.74265	0.109237	4
CH000004603	TAZ ---> CTGF	2	1.97831	0.003	0.943165	1226	1.74262	0.108843	2
CH000000500	CaMKII-alpha ---> Rac1	15	14.8373	0.007	0.363143	3671	1.74118	0.109251	15
CH000004552	beta-glucan ---DECTIN1---> IP3, DAG	5	4.94577	0.008	0.624019	8101	1.73862	0.110541	5
CH000000640	PDGF B ---> ERK	27	26.7072	0.017	0.276019	3635	1.73736	0.110457	27
CH000023005	IL-6 complex formation	3	2.96746	0.008	0.782958	4677	1.73486	0.111648	3
CH000004601	YAP ---> CTGF	2	1.97831	0.002	0.943165	1226	1.73223	0.112918	2
CH000000759	EDAR pathway	31	30.6638	0.017	0.265232	11665	1.72692	0.115481	31
CH000004573	LPS ---Rac1, ERK---> IL-1RA	15	14.8373	0.012	0.370001	7831	1.72677	0.115143	15
CH000004476	IL-17 ---> TRAF6	16	15.8265	0.013	0.347395	10023	1.72317	0.117249	16
CH000004535	IL-6 trans-signaling	3	2.96746	0.016	0.782958	4677	1.72201	0.117648	3
CH000004549	FcgammaRIII	3	2.96746	0.012	0.767495	5010	1.72118	0.117729	3
CH000004291	globotetraosylceramide ---> lactosylceramide	2	1.97831	0.003	0.930163	1506	1.71372	0.121644	2
CH000000639	PDGF A ---> ERK	27	26.7072	0.009	0.276019	3635	1.70894	0.124645	27
CH000000883	Fas ---> Caspase-2	6	5.93492	0.008	0.548888	2540	1.7085	0.124523	6
CH000000062	Syk ---> RhoA	3	2.96746	0.014	0.80274	4251	1.70802	0.124423	3
CH000004694	ErbB4 mediated signaling	23	22.7505	0.015	0.29757	4835	1.70507	0.126396	23
CH000000343	CH000000343	3	2.96746	0.019	0.765266	5058	1.69728	0.131141	3
CH000001016	AR pathway	46	45.5011	0.015	0.211769	4813	1.69681	0.130985	46
CH000003693	cytidine 5'-phosphate ---> RNA-P-U	50	49.4577	0.01	0.20178	10310	1.6955	0.131645	50
CH000003888	EGF ---> Src	5	4.94577	0.011	0.59831	4347	1.69531	0.131289	5
CH000000205	CH000000205	2	1.97831	0.011	0.921898	1684	1.69116	0.134136	2
CH000000461	TGFbeta1 ---> Smad1, Smad2, Smad5	7	6.92408	0.017	0.552991	9631	1.69022	0.133891	6
CH000000049	PIP3 ---> ARF5	2	1.97831	0.012	0.902025	2112	1.68553	0.137088	2
CH000004709	Tip60 ubiquitination	28	27.6963	0.021	0.269483	14203	1.68469	0.137274	28
CH000000815	POSH ---> JNK1, JNK2	14	13.8482	0.009	0.37118	7395	1.68464	0.136872	14
CH000004651	AT1A ---beta-arrestin2---> EIF-4E	9	8.90239	0.021	0.466575	9100	1.68222	0.138542	9
CH000000886	Fas ---/ SRF	6	5.93492	0.012	0.554493	6009	1.67989	0.139354	6
CH000000623	EGF ---> DAG, IP3	3	2.96746	0.013	0.768656	4985	1.67907	0.139429	3
CH000003547	PIAS2-alpha ---SUMO-1---/ AR	5	4.94577	0.011	0.614099	4007	1.67792	0.139909	5
CH000004341	ER-alpha pathway	78	77.154	0.015	0.16764	6433	1.67588	0.140476	73
CH000000885	TNFR1 ---> Caspase-2	6	5.93492	0.015	0.548888	2540	1.6748	0.140448	6
CH000004203	BDNF ---trkB---> Rap1	15	14.8373	0.019	0.363682	7967	1.67368	0.141027	15
CH000004486	TLR9 ---IRF-7---> IFNA	8	7.91323	0.018	0.491163	8271	1.6707	0.142954	8
CH000000666	alpha IIb beta3 ---> Rac1	28	27.6963	0.021	0.26414	7395	1.66933	0.143515	28
CH000000577	fMLP ---> superoxide	32	31.6529	0.011	0.250575	4034	1.66825	0.143911	32
CH000003777	glucose-1-p ---> D-glucuronate	5	4.94577	0.018	0.596201	8700	1.66709	0.143913	5
CH000004550	FcgammaRI	3	2.96746	0.02	0.767495	5010	1.66693	0.143549	3
CH000003696	2'-deoxycytidine-5'-phosphate ---> DNA-P-UC	26	25.718	0.013	0.273286	9032	1.66544	0.144188	26
CH000003880	EGF ---> PLCgamma1	3	2.96746	0.01	0.768656	4985	1.66525	0.143896	3
CH000004564	TLR9 ---Btk--->NF-kappaB	6	5.93492	0.018	0.55231	6056	1.66499	0.143624	6
CH000000702	ATR ---> p53	3	2.96746	0.012	0.7303	5811	1.66314	0.144737	3
CH000004485	TLR7 ---> IFNA1	8	7.91323	0.015	0.491163	8271	1.66275	0.144571	8
CH000000610	BCR ---> c-Jun	22	21.7614	0.019	0.293317	7395	1.66263	0.144262	22
CH000000708	Caspase-3 ---/ p53	6	5.93492	0.017	0.543099	9844	1.66043	0.145632	6
CH000000725	c-Cbl ---/ ErbB1	8	7.91323	0.02	0.475058	11310	1.65681	0.148228	8
CH000000297	CH000000297	2	1.97831	0.006	0.885076	2477	1.65401	0.150161	2
CH000000746	IL-1 pathway	43	42.5336	0.018	0.21363	8431	1.65301	0.149668	43
CH000000465	endoglin ---> Smad2	4	3.95662	0.016	0.631304	2559	1.65225	0.149804	4
CH000004534	IL-6 ---> SOCS3, FOS	5	4.94577	0.018	0.582984	4677	1.64809	0.152516	5
CH000004570	ErbB1 ---Sos1, H-Ras---> Rac activation	26	25.718	0.018	0.268015	8317	1.64764	0.152448	26
CH000003773	GDP ---> dGTP	28	27.6963	0.01	0.259557	9032	1.64657	0.152847	28
CH000004629	TGFbeta1 disposal to ECM	5	4.94577	0.018	0.749896	5389	1.64297	0.15533	3
CH000000748	alpha IIb beta3 pathway	28	27.6963	0.015	0.26414	7395	1.64188	0.155725	28
CH000003595	glycolysis	31	30.6638	0.012	0.248614	7159	1.6404	0.155639	31
CH000000159	CH000000159	4	3.95662	0.015	0.651574	7507	1.63741	0.157204	4
CH000000895	Fas ---> Abl	6	5.93492	0.021	0.54234	2681	1.63706	0.1571	6
CH000004688	ErbB4-JM-A CYT1 ---> YAP	10	9.89154	0.022	0.431522	3633	1.63618	0.157387	10
CH000000171	CH000000171	2	1.97831	0.017	0.89102	2349	1.63596	0.157083	2
CH000000770	beta-catenin network	100	98.9154	0.018	0.140318	8407	1.63478	0.157661	100
CH000000279	CH000000279	2	1.97831	0.019	0.885076	2477	1.63425	0.157621	2
CH000000377	CH000000377	2	1.97831	0.011	0.885076	2477	1.63094	0.159963	2
CH000000021	Rac1 ---/ stathmin	9	8.90239	0.019	0.434613	7395	1.62819	0.160519	9
CH000000787	IL-8 ---/ AC5	24	23.7397	0.02	0.271707	10308	1.62782	0.160253	24
CH000000259	CH000000259	2	1.97831	0.015	0.846675	3304	1.6266	0.16089	2
CH000000884	Caspase-9 ---> Caspases	8	7.91323	0.024	0.47118	6009	1.62484	0.16202	8
CH000004612	antagonistic effect of ANG-2	4	3.95662	0.023	0.639802	2376	1.62424	0.161639	4
CH000000567	OSM ---> ERK	29	28.6855	0.021	0.253309	7920	1.61797	0.166682	29
CH000000800	NT ---> Gi	22	21.7614	0.019	0.288622	9454	1.61758	0.166098	22
CH000000908	Caspase-8 ---> Abl	2	1.97831	0.018	0.875604	2681	1.61516	0.167791	2
CH000003778	ADP ---> dATP	28	27.6963	0.009	0.259557	9032	1.61457	0.167769	28
CH000003781	interconversion and degradation of purine deoxyribonucleotides	36	35.6095	0.015	0.224969	6530	1.61423	0.167642	36
CH000003712	lysine ---> crotonylcoA	7	6.92408	0.024	0.503653	7617	1.61268	0.168173	7
CH000000028	angiotensin II ---> ERK2	6	5.93492	0.024	0.527184	6597	1.6107	0.169426	6
CH000000797	G-alpha-q ---> IP3	9	8.90239	0.019	0.434613	7395	1.60797	0.171352	9
CH000000972	Abl ---/ Bcl-xL	3	2.96746	0.029	0.724866	5928	1.60632	0.172424	3
CH000004725	SDF-1 ---> calcium mobilization	26	25.718	0.02	0.272138	3258	1.60583	0.17239	26
CH000004516	TLR9 ---IRF-1---> NOS2, IFNB1, IL12A	3	2.96746	0.022	0.718923	6056	1.60381	0.173574	3
CH000004692	LXR network	7	6.92408	0.019	0.523407	10268	1.60368	0.173242	6
CH000000957	E1 ---/ beta-tubulin	8	7.91323	0.023	0.454041	6378	1.60247	0.173872	8
CH000004589	Rac1 ---> DIAPH2	11	10.8807	0.02	0.394388	3258	1.60146	0.174335	11
CH000000004	fMLP ---> PLCbeta2	3	2.96746	0.019	0.720641	6019	1.60041	0.174731	3
CH000003812	heme, globin ---> bilirubin beta-diglucuronide	22	21.7614	0.024	0.295446	10873	1.60001	0.174616	20
CH000003716	lysine metabolism	28	27.6963	0.017	0.253819	7617	1.5987	0.175251	28
CH000000703	ATM ---> p53	3	2.96746	0.023	0.72756	5870	1.59754	0.175695	3
CH000000823	dsRNA ---> IKK-alpha:IKK-beta{p}:IKK-gamma	15	14.8373	0.024	0.346278	7931	1.5975	0.175283	14
CH000004301	plasmenylethanolamine ---> plasmenylcholine	10	9.89154	0.031	0.411724	6213	1.59652	0.175751	10
CH000000618	Rac1 ---> p38	9	8.90239	0.028	0.434613	7395	1.59303	0.178538	9
CH000000555	angiotensin II ---> paxillin	6	5.93492	0.021	0.514103	3289	1.592	0.17892	6
CH000000824	dsRNA ---> p50:RelA	19	18.7939	0.014	0.314952	9974	1.59181	0.178642	18
CH000004675	EP2 ---> VEGFA	24	23.7397	0.023	0.269689	9454	1.59043	0.179546	24
CH000003545	Chfr ---> Aurora-A	4	3.95662	0.023	0.63077	7955	1.58838	0.180842	4
CH000000889	Fer ---> beta-catenin{Tyr142}	7	6.92408	0.026	0.479176	8144	1.58501	0.182956	7
CH000000997	Ubc9 ---/ p73alpha	6	5.93492	0.023	0.525884	6625	1.5845	0.182969	6
CH000000976	Plk3 ---> p53	3	2.96746	0.033	0.7303	5811	1.58402	0.182852	3
CH000000756	OSM pathway	32	31.6529	0.023	0.237832	3635	1.58373	0.182694	32
CH000000450	CH000000450	2	1.97831	0.018	0.847372	3289	1.58303	0.182885	2
CH000000451	CH000000451	2	1.97831	0.024	0.847372	3289	1.58185	0.183438	2
CH000003605	CO2, H2O ---> spermine	21	20.7722	0.027	0.291471	2959	1.57927	0.184902	21
CH000000740	IFNalpha/beta pathway	42	41.5445	0.023	0.204282	8429	1.5774	0.186063	42
CH000004621	NF-AT5 regulation	7	6.92408	0.027	0.482991	4985	1.5748	0.187487	7
CH000000258	CH000000258	2	1.97831	0.027	0.846675	3304	1.57253	0.188969	2
CH000000275	CH000000275	2	1.97831	0.025	0.84245	3395	1.57128	0.189716	2
CH000003813	hemoglobin oxidation	22	21.7614	0.025	0.295446	10873	1.57101	0.189417	20
CH000003881	Pin1 ---> APP	5	4.94577	0.023	0.5743	4864	1.57027	0.189591	5
CH000003602	GTP ---> tetrahydrobiopterin	6	5.93492	0.022	0.527463	6591	1.56913	0.190265	6
CH000004444	1-alkyl-glycerol 3-phosphate ---> platelet-activating factor	2	1.97831	0.025	0.860234	3012	1.56765	0.191248	2
CH000004576	p53 ---Ubc13---> p53{ub{K63}} ubiquitination	6	5.93492	0.029	0.518732	6779	1.56714	0.191286	6
CH000003566	citrate cycle	21	20.7722	0.021	0.289866	7096	1.56647	0.191483	21
CH000004319	platelet-activating factor ---> fatty aldehyde, alkylglycerol	8	7.91323	0.031	0.461705	6213	1.56181	0.195001	8
CH000004560	TLR5	7	6.92408	0.028	0.480298	5043	1.5594	0.197006	7
CH000004645	Ras processing	5	4.94577	0.019	0.571402	9234	1.55729	0.198112	5
CH000000510	MEKK4 ---MKK6---> ATF-2	11	10.8807	0.032	0.384122	7395	1.55716	0.197721	11
CH000000262	CH000000262	2	1.97831	0.024	0.846675	3304	1.55494	0.199453	2
CH000004724	SDF-1 (CXCL12) mediated signaling	33	32.6421	0.03	0.228071	9454	1.5523	0.201486	33
CH000000557	vitronectin ---> PAK4	4	3.95662	0.029	0.611034	8380	1.54987	0.203543	4
CH000004523	TLR2, TLR6 internalization	4	3.95662	0.033	0.612775	2958	1.54157	0.210386	4
CH000004592	N-cadherin:plakoglobin, homophilic ligation	6	5.93492	0.031	0.502028	3549	1.53814	0.21258	6
CH000004527	APG4B ---APG5,APG12--->LC3A	6	5.93492	0.027	0.517803	6799	1.53778	0.212381	6
CH000003610	metabolism of amino sugars	17	16.8156	0.027	0.315287	8418	1.53754	0.21212	17
CH000000983	pRb ---> p73alpha	3	2.96746	0.032	0.692501	6625	1.5369	0.212337	3
CH000004484	KSR scaffold complex	20	19.7831	0.033	0.286537	7834	1.53144	0.216958	20
CH000004179	NGF ---TRAF6---> trkA K63-poly-ubiquitinated	7	6.92408	0.033	0.475036	11310	1.53044	0.2174	7
CH000004418	AR ---> IRS2, IGF1R, SGK, BIRC5	2	1.97831	0.024	0.823783	3797	1.53007	0.217216	2
CH000001027	TopoI ---> c-Jun ---> ErbB1	3	2.96746	0.026	0.700255	6458	1.52887	0.218008	3
CH000000260	CH000000260	2	1.97831	0.037	0.846675	3304	1.52871	0.217733	2
CH000000707	DNA-PK ---> p53	5	4.94577	0.036	0.543073	9844	1.52802	0.218056	5
CH000000595	IFNalpha, IFNbeta ---> Rap1	19	18.7939	0.031	0.293114	8429	1.52134	0.224892	19
CH000000047	insulin ---> GLUT4	16	15.8265	0.038	0.313604	8058	1.52014	0.22555	16
CH000004524	TLR2, TLR6	5	4.94577	0.033	0.553012	9630	1.51676	0.22822	5
CH000000968	PI3K ---Mdm2---/ p53	33	32.6421	0.034	0.220243	8317	1.51675	0.227687	33
CH000000539	gamma-secretase processing	6	5.93492	0.034	0.499892	3595	1.51256	0.231092	6
CH000004674	EP2 ---> BDNF	30	29.6746	0.033	0.228039	9454	1.5123	0.230886	30
CH000003575	L-glutamine ---> uridine-5'-phosphate	3	2.96746	0.023	0.696633	6536	1.51008	0.229472	3
CH000000657	insulin ---IRS---> PRK2, SHP-2, MAPK cascade	20	19.7831	0.029	0.28254	7920	1.50902	0.230039	20
CH000004689	ErbB4-JM-A CYT2 ---> YAP, WOX1	11	10.8807	0.044	0.376968	3633	1.50764	0.230981	11
CH000003576	synthesis of pyrimidine ribonucleotides	3	2.96746	0.037	0.696633	6536	1.50716	0.23043	3
CH000004294	NT-3 ---trkC---> Erk	20	19.7831	0.038	0.28254	7920	1.50606	0.231053	20
CH000004510	IL-5 ---> ERK	24	23.7397	0.034	0.257565	7920	1.50514	0.231502	24
CH000004192	NRG ---> ERK	27	26.7072	0.032	0.238481	8431	1.50239	0.234018	27
CH000003548	PIAS1 ---SUMO-1---/ AR	6	5.93492	0.035	0.480757	4007	1.50113	0.234826	6
CH000000897	Apo2L ---> Caspase-10	4	3.95662	0.033	0.616304	2882	1.50092	0.234556	4
CH000000761	IL-10 pathway	7	6.92408	0.037	0.443706	2754	1.49789	0.237383	7
CH000000788	GROalpha ---/ AC5	23	22.7505	0.038	0.260813	10308	1.49776	0.23698	23
CH000003647	D-ribulose 5-phosphate ---> D-xylulose-5-phosphate	5	4.94577	0.04	0.543631	9832	1.495	0.238493	5
CH000000457	ErbB1 ---> Nck	3	2.96746	0.031	0.676759	6964	1.49374	0.238858	3
CH000004551	PIAS3 ---/ STAT3	2	1.97831	0.036	0.806835	4162	1.49373	0.238346	2
CH000000593	IFNgamma ---> STAT1alpha	10	9.89154	0.034	0.385182	11092	1.4919	0.239375	10
CH000004618	NF-AT5 ---> ACTA2, CNN1	4	3.95662	0.034	0.594595	8734	1.4912	0.239643	4
CH000000831	LPS ---> IRF-3:IRF-7:CBP:p300	14	13.8482	0.038	0.338622	995	1.49053	0.239815	13
CH000004502	leptin --->ERK	21	20.7722	0.045	0.273733	10520	1.49009	0.239737	21
CH000000278	CH000000278	2	1.97831	0.041	0.795645	4403	1.48303	0.246624	2
CH000000163	CH000000163	3	2.96746	0.033	0.675969	6981	1.4805	0.248841	3
CH000000986	p53 ---> cytochrome C	5	4.94577	0.034	0.530321	5811	1.47589	0.253117	5
CH000000698	IL-1beta ---> c-Jun	17	16.8156	0.039	0.295501	5043	1.47299	0.255843	17
CH000000123	CH000000123	5	4.94577	0.041	0.523383	10268	1.47223	0.256144	5
CH000000534	GEFT ---> c-Jun	12	11.8698	0.037	0.348927	3258	1.47014	0.257915	12
CH000000186	CH000000186	2	1.97831	0.028	0.802702	4251	1.46888	0.258803	2
CH000004229	BDNF ---p75NTR---> NRIF ubiquitination	13	12.859	0.047	0.335663	6029	1.46743	0.259417	13
CH000004298	plasmenylcholine biosynthesis	19	18.7939	0.047	0.276338	8790	1.4658	0.260627	19
CH000000795	furin ---> sortilin	4	3.95662	0.045	0.580617	9035	1.46404	0.261504	4
CH000000924	Cdk2 ---> p53	4	3.95662	0.037	0.579316	9063	1.46133	0.264177	4
CH000000663	Hsp90 ---> AhR	8	7.91323	0.036	0.424025	4332	1.4613	0.263673	8
CH000004311	biosynthesis of PAF (de novo pathway)	2	1.97831	0.04	0.801356	4280	1.45909	0.265078	2
CH000000802	G-alpha-q ---> arachidonic acid, ERK	35	34.6204	0.036	0.20415	3610	1.45819	0.265636	35
CH000004483	IL-3 ---Ras---> Bcl-2, MBP, CREB1	27	26.7072	0.04	0.225153	7920	1.45738	0.265551	27
CH000000842	Htt ---/ Caspase-8	4	3.95662	0.028	0.58259	3608	1.45735	0.265067	4
CH000004312	1-alkyl-2-lyso-sn-glycero-3-P ---> platelet-activating factor	2	1.97831	0.039	0.801356	4280	1.45705	0.264866	2
CH000000911	Apo2L ---/ MLH1	2	1.97831	0.049	0.803631	4231	1.45674	0.264629	2
CH000000204	CH000000204	3	2.96746	0.035	0.648417	395	1.45657	0.26429	3
CH000004409	alpha-enolase (MBP-1) ---NICD1---/ c-myc	3	2.96746	0.039	0.648479	7573	1.4561	0.264327	3
CH000000915	Caspase-3 ---/ CREB-341	5	4.94577	0.044	0.521126	6009	1.45229	0.26831	5
CH000003638	glucose-6-p ---> D-ribulose 5-phosphate	3	2.96746	0.045	0.786404	4602	1.45097	0.268743	2
CH000000743	tuberin pathway	37	36.5987	0.047	0.20359	8429	1.44922	0.270274	37
CH000003563	glucose ---> pyruvate	24	23.7397	0.047	0.251224	7159	1.44837	0.270213	24
CH000000579	IL-10 ---> STAT1alpha, STAT3	7	6.92408	0.044	0.443706	2754	1.44723	0.271029	7
CH000000131	CH000000131	3	2.96746	0.041	0.6317	755	1.44483	0.273207	3
CH000000887	Fas ---> Caspase-8	5	4.94577	0.041	0.516547	1800	1.44303	0.274107	5
CH000004703	MCP-1 (/CCL2) network	30	29.6746	0.048	0.22835	3258	1.43988	0.277398	29
CH000004687	ErbB4, ligand-depending processing	10	9.89154	0.045	0.375687	4835	1.43515	0.282083	10
CH000004663	CPBP (KLF6) ---> ENG	2	1.97831	0.045	0.784082	4652	1.43056	0.285984	2
CH000000786	IL-8 pathway	49	48.4685	0.045	0.174863	10308	1.42843	0.288193	49
CH000000808	MEKK2 ---MKK7---> c-Jun	4	3.95662	0.042	0.558535	4126	1.42664	0.28981	4
CH000000128	CH000000128	3	2.96746	0.05	0.6317	755	1.42661	0.289263	3
CH000004627	TGFbeta1 ---Tak1---> p38, JNK	21	20.7722	0.049	0.266103	5043	1.41901	0.295507	20
CH000000921	Caspase-8 ---/ Mcl-1L	2	1.97831	0.047	0.769177	4973	1.41774	0.296553	2
CH000000124	CH000000124	5	4.94577	0.049	0.523383	10268	1.41608	0.297233	5
CH000004453	MITF ---> TPH1	6	5.93492	0.041	0.462366	4403	1.41485	0.298269	6
CH000000132	CH000000132	3	2.96746	0.048	0.6317	755	1.41351	0.298366	3
CH000004596	VE-cadherin, ligation	6	5.93492	0.048	0.464131	4365	1.4129	0.298539	6
CH000000833	Caspase-3 ---> Bax	3	2.96746	0.046	0.6317	755	1.4067	0.302261	3
CH000000628	PAK1 ---> Rac1	10	9.89154	0.046	0.356819	7395	1.40327	0.305665	10
CH000000553	Pyk2 ---> Cdc42	3	2.96746	0.049	0.64286	7694	1.40325	0.30511	3
CH000000622	EGF ---> DAG, IP3	7	6.92408	0.046	0.428651	6155	1.40042	0.305998	7
CH000004259	arachidonic acid ---> trioxilin A3	9	8.90239	0.046	0.402787	2097	1.39519	0.310275	8
CH000004701	TGFbeta1 ---> MCP-1(CCL2)	7	6.92408	0.05	0.454533	982	1.37956	0.322788	6
CH000000502	NDKA ---/ JNK	12	11.8698	0.05	0.3235	7395	1.37741	0.322866	12
CH000000129	CH000000129	3	2.96746	0.048	0.6317	755	1.36198	0.336374	3

## Sheet: Supplimentary-1C
TRANSCRIPTION FACTOR BINDING SITES ENRICHED AT THE PROMOTERS OF DE GENES IN STS
ID	Transpath isogroups ID	Site model ID	Yes density per 1000bp	No density per 1000bp	Yes-No ratio	Model cutoff	P-value
AR	MO000021454	V$AR_02	0.625	0.425467	1.46897	0.7822	0.00481636
ASCL1	MO000179227	V$E2A_Q6	1.84253	1.49373	1.23352	0.9673	0.00550207
BACH1	MO000085474	V$MAF_Q6_01	0.219156	0.10101	2.16964	0.9278	0.00258052
BACH2	MO000028605	V$MAF_Q6_01	0.219156	0.10101	2.16964	0.9278	0.00258052
BCL3	MO000019320	V$BCL3_03	1.48539	1.03765	1.43149	0.8842	7.44387e-05
BCL6	MO000026319	V$BCL6_Q3	1.84253	1.59474	1.15538	0.8719	0.0388463
BHLHE40	MO000039154	V$EBOX_Q6_01	3.0763	2.66299	1.1552	0.9016	0.010869
BHLHE41	MO000039155	V$EBOX_Q6_01	3.0763	2.66299	1.1552	0.9016	0.010869
CEBPA	MO000019418	V$CEBP_Q2	0.0649351	0.00306091	21.2143	0.9912	0.000215308
CEBPB	MO000019381	V$CEBPB_Q3	0.146104	0.0428528	3.40944	0.9942	0.000546498
CEBPD	MO000002641	V$CEBPD_Q3	0.146104	0.0520355	2.80777	0.9939	0.002178
CEBPE	MO000028673	V$CEBP_Q3	0.300325	0.183655	1.63527	0.991	0.0137133
CEBPG	MO000028674	V$CEBP_Q3	0.300325	0.183655	1.63527	0.991	0.0137133
CLOCK	MO000028681	V$CLOCK_Q6	4.80519	4.13835	1.16114	0.913	0.00144194
CRX	MO000026764	V$CRX_Q6	2.18344	1.88246	1.15989	0.8982	0.0239996
CTBP1	MO000033257	V$CTBP1_Q3	0.300325	0.189777	1.58252	0.9395	0.0193293
CTCF	MO000046076	V$CTCF_08	0.535714	0.37037	1.44643	0.8631	0.0108286
CTNNB1	MO000017049	V$BETACATENIN_Q3_01	0.381494	0.208142	1.83285	0.9953	0.00122145
CUX1	MO000024708	V$CDP_02	0.292208	0.16835	1.73571	0.8834	0.00787861
E2F4	MO000023603	V$E2F4_07	0.219156	0.128558	1.70472	0.9921	0.0226917
EGR1	MO000017914	V$EGR1_16	11.1039	9.72758	1.14149	0.7922	2.65493e-05
EGR2	MO000024797	V$KROX_Q6	10.9172	10.2204	1.06818	0.7738	0.0217534
EGR3	MO000046000	V$KROX_Q6	10.9172	10.2204	1.06818	0.7738	0.0217534
EGR4	MO000033013	V$KROX_Q6	10.9172	10.2204	1.06818	0.7738	0.0217534
ELF3	MO000054232	V$ESE1_Q6	5.38149	4.81175	1.11841	0.933	0.00870476
EP300	MO000056654	V$P300_01	0.0487013	0.00612182	7.95536	0.992	0.00692817
ESR1	MO000019431	V$ERALPHA_01	0.137987	0.0367309	3.7567	0.8031	0.000402758
ESR2	MO000059335	V$ER_Q6_02	0.105519	0.0489746	2.15458	0.9864	0.032936
ESRRA	MO000026738	V$ERR1_Q2_01	1.03084	0.857055	1.20277	0.8791	0.0485748
ETS1	MO000059013	V$ETS1_B	6.55032	5.40863	1.21109	0.823	4.63493e-06
ETS2	MO000056529	V$ETS2_Q4	0.551948	0.419345	1.31621	0.9851	0.0394486
FOS	MO000018137	V$CFOS_Q6	0.162338	0.0397919	4.07967	0.9992	6.49779e-05
FOSB	MO000082447	V$AP1_Q6_01	0.170455	0.0489746	3.48047	0.9959	0.000161157
FOSL1	MO000025684	V$AP1_Q6_01	0.170455	0.0489746	3.48047	0.9959	0.000161157
FOSL2	MO000026074	V$AP1_Q6_01	0.170455	0.0489746	3.48047	0.9959	0.000161157
FOXA1	MO000026492	V$HNF3_Q6_01	0.600649	0.315274	1.90517	0.9554	2.494e-05
FOXA2	MO000026493	V$HNF3B_01	0.965909	0.449954	2.14668	0.9105	1.05364e-09
FOXA3	MO000045366	V$HNF3_Q6_01	0.600649	0.315274	1.90517	0.9554	2.494e-05
FOXM1	MO000088314	V$FOXM1_Q3	0.340909	0.232629	1.46546	0.9036	0.0312726
FOXO1	MO000034454	V$FOXO1_04	0.292208	0.171411	1.70472	0.6561	0.00958682
FOXO3	MO000020701	V$FOXO3A_Q1	0.616883	0.413223	1.49286	0.932	0.00377057
FOXO4	MO000000904	V$FOXO4_05	1.37987	0.936639	1.47321	0.7917	4.35007e-05
GATA1	MO000046001	V$GATA1_03	0.202922	0.119376	1.69986	0.956	0.0282227
GATA2	MO000032472	V$GATA2_01	1.47727	1.26722	1.16576	0.9863	0.0476075
GATA4	MO000026663	V$GATA4_Q3	0.137987	0.070401	1.96002	0.9218	0.0281264
GCM1	MO000026306	V$GCM_Q4	0.137987	0.0306091	4.50804	0.9793	0.000118024
GCM2	MO000161847	V$GCM_Q4	0.137987	0.0306091	4.50804	0.9793	0.000118024
GLI1	MO000019117	V$GLI_Q3	6.64773	5.89838	1.12704	0.8831	0.00235891
GLI2	MO000117573	V$GLI_Q3	6.64773	5.89838	1.12704	0.8831	0.00235891
GLI3	MO000019113	V$GLI_Q3	6.64773	5.89838	1.12704	0.8831	0.00235891
GLIS1	MO000176485	V$GLI_Q3	6.64773	5.89838	1.12704	0.8831	0.00235891
GLIS2	MO000032975	V$GLI_Q3	6.64773	5.89838	1.12704	0.8831	0.00235891
GLIS3	MO000145769	V$GLI_Q3	6.64773	5.89838	1.12704	0.8831	0.00235891
GTF2B	MO000013528	V$TFIIB_Q6_02	0.771104	0.621365	1.24098	0.9623	0.0485316
GTF2I	MO000019622	V$TFIII_Q6	4.19643	3.37313	1.24408	0.8865	2.94411e-05
HAND1	MO000028230	V$HAND1E47_01	4.38312	3.72513	1.17663	0.8347	0.00100221
HAND2	MO000028231	V$EBOX_Q6_01	3.0763	2.66299	1.1552	0.9016	0.010869
HBP1	MO000144574	V$SOX_Q4	0.154221	0.0428528	3.59885	0.9984	0.000255544
HDAC1	MO000023575	V$HDAC1_Q3	2.38636	2.05081	1.16362	0.9099	0.0172564
HDAC2	MO000058923	V$HDAC2_02	0.349026	0.214264	1.62895	0.9548	0.00879903
HLTF	MO000118284	V$RUSH1A_02	1.60714	1.35292	1.1879	0.9897	0.0253602
HMGA1	MO000026358	V$HMGIY_Q6	1.24188	0.881543	1.40876	0.9621	0.00045656
HMGA2	MO000255539	V$HMGIY_Q6	1.24188	0.881543	1.40876	0.9621	0.00045656
HNF1A	MO000082618	V$HNF1_C	0.0649351	0.0214264	3.03061	0.8727	0.0297361
HNF1B	MO000082711	V$HNF1_Q6	1.22565	0.829507	1.47756	0.8372	9.97909e-05
HNF4A	MO000027755	V$DR1_Q3	0.0811688	0.0244873	3.31473	0.9059	0.0108026
HNF4G	MO000026415	V$DR1_Q3	0.0811688	0.0244873	3.31473	0.9059	0.0108026
HOXA5	MO000120562	V$HOX13_02	0.154221	0.0795837	1.93784	0.9553	0.0225944
HSF1	MO000033378	V$HSF1_02	0.0811688	0.00918274	8.83929	0.8941	0.000288097
HSF2	MO000046011	V$HSF2_02	0.0730519	0.0122436	5.96652	0.8936	0.00200953
IKZF1	MO000026678	V$IK3_01	0.633117	0.446893	1.41671	0.8599	0.00879802
IRF1	MO000007686	V$IRF_Q6	0.0649351	0.00306091	21.2143	0.9813	0.000215308
IRF2	MO000007691	V$IRF_Q6	0.0649351	0.00306091	21.2143	0.9813	0.000215308
IRF3	MO000285816	V$IRF_Q6	0.0649351	0.00306091	21.2143	0.9813	0.000215308
IRF4	MO000028705	V$IRF_Q6	0.0649351	0.00306091	21.2143	0.9813	0.000215308
IRF5	MO000031282	V$IRF_Q6	0.0649351	0.00306091	21.2143	0.9813	0.000215308
IRF6	MO000031288	V$IRF_Q6	0.0649351	0.00306091	21.2143	0.9813	0.000215308
IRF7	MO000007703	V$IRF_Q6	0.0649351	0.00306091	21.2143	0.9813	0.000215308
IRF8	MO000023424	V$IRF_Q6	0.0649351	0.00306091	21.2143	0.9813	0.000215308
IRF9	MO000007759	V$IRF_Q6_01	0.0730519	0.0275482	2.65179	0.9915	0.0344381
ISL1	MO000026052	V$ISL1_Q3	0.551948	0.388736	1.41985	0.9877	0.0131564
JUN	MO000019469	V$AP1_Q6_01	0.170455	0.0489746	3.48047	0.9959	0.000161157
JUNB	MO000007830	V$AP1_Q6_01	0.170455	0.0489746	3.48047	0.9959	0.000161157
JUND	MO000007834	V$JUND_Q6	0.0730519	0.00918274	7.95536	1	0.00081777
KLF1	MO000028729	V$KLF_Q3	3.23052	2.63545	1.2258	0.9767	0.00050304
KLF10	MO000028727	V$KLF_Q3	3.23052	2.63545	1.2258	0.9767	0.00050304
KLF11	MO000028728	V$KLF_Q3	3.23052	2.63545	1.2258	0.9767	0.00050304
KLF12	MO000028507	V$KLF_Q3	3.23052	2.63545	1.2258	0.9767	0.00050304
KLF13	MO000028794	V$KLF_Q3	3.23052	2.63545	1.2258	0.9767	0.00050304
KLF15	MO000028801	V$KLF_Q3	3.23052	2.63545	1.2258	0.9767	0.00050304
KLF16	MO000043759	V$KLF_Q3	3.23052	2.63545	1.2258	0.9767	0.00050304
KLF17	MO000116238	V$KLF_Q3	3.23052	2.63545	1.2258	0.9767	0.00050304
KLF2	MO000028730	V$KLF_Q3	3.23052	2.63545	1.2258	0.9767	0.00050304
KLF3	MO000045319	V$KLF_Q3	3.23052	2.63545	1.2258	0.9767	0.00050304
KLF4	MO000125561	V$GKLF_Q4	1.12825	0.77135	1.46269	1	0.000251607
KLF5	MO000026229	V$BTEB2_Q3_01	7.92208	5.99327	1.32183	0.9255	1.42397e-12
KLF6	MO000028736	V$KLF_Q3	3.23052	2.63545	1.2258	0.9767	0.00050304
KLF7	MO000028732	V$KLF_Q3	3.23052	2.63545	1.2258	0.9767	0.00050304
KLF8	MO000095459	V$KLF_Q3	3.23052	2.63545	1.2258	0.9767	0.00050304
KLF9	MO000026230	V$KLF_Q3	3.23052	2.63545	1.2258	0.9767	0.00050304
LEF1	MO000159782	V$LEF1TCF1_Q4	0.487013	0.229568	2.12143	0.9353	1.60065e-05
LYL1	MO000025819	V$TALLIKE_Q6	6.24188	5.47597	1.13987	0.878	0.00139322
MAF	MO000037926	V$MAF_Q6_01	0.219156	0.10101	2.16964	0.9278	0.00258052
MAFB	MO000037925	V$MAF_Q6_01	0.219156	0.10101	2.16964	0.9278	0.00258052
MAFF	MO000037924	V$MAF_Q6_01	0.219156	0.10101	2.16964	0.9278	0.00258052
MAFG	MO000028667	V$MAF_Q6_01	0.219156	0.10101	2.16964	0.9278	0.00258052
MAFK	MO000028668	V$MAF_Q6_01	0.219156	0.10101	2.16964	0.9278	0.00258052
MAX	MO000022234	V$MAX_10	0.275974	0.156107	1.76786	0.9031	0.00793193
MAZ	MO000105384	V$MAZ_Q5	7.36201	5.76982	1.27595	0.8701	1.58974e-09
MECOM	MO000033253	V$EVI1_03	0.12987	0.0673401	1.92857	0.8338	0.035707
MECP2	MO000028711	V$MECP2_Q4_01	0.25974	0.153046	1.69714	0.9223	0.0146243
MEF2C	MO000031322	V$MEF2C_04	0.12987	0.0214264	6.06122	0.9968	3.07133e-05
MEF2D	MO000085555	V$MEF2D_Q4	1.48539	1.24885	1.1894	0.9894	0.0294485
MITF	MO000025758	V$MITF_Q6	0.836039	0.627487	1.33236	0.9638	0.0112195
MXD1	MO000025770	V$EBOX_Q6_01	3.0763	2.66299	1.1552	0.9016	0.010869
MXD3	MO000139725	V$EBOX_Q6_01	3.0763	2.66299	1.1552	0.9016	0.010869
MXD4	MO000141355	V$EBOX_Q6_01	3.0763	2.66299	1.1552	0.9016	0.010869
MXI1	MO000025769	V$EBOX_Q6_01	3.0763	2.66299	1.1552	0.9016	0.010869
MYB	MO000009619	V$CMYB_01	0.194805	0.0887665	2.19458	0.9212	0.00394562
MYC	MO000056483	V$EBOX_Q6_01	3.0763	2.66299	1.1552	0.9016	0.010869
MYCN	MO000026369	V$EBOX_Q6_01	3.0763	2.66299	1.1552	0.9016	0.010869
MYF5	MO000024985	V$E2A_Q6	1.84253	1.49373	1.23352	0.9673	0.00550207
MYF6	MO000024986	V$MRF4_Q3	0.649351	0.50199	1.29355	0.9893	0.0360467
MYOD1	MO000019612	V$MYOD_Q6_02	1.08766	0.850934	1.2782	0.9689	0.0121306
MYOG	MO000024984	V$MYOD_Q6_01	1.875	1.46924	1.27617	0.9216	0.00151466
MZF1	MO000084468	V$MZF1_02	2.6461	1.8947	1.39658	0.8609	9.73686e-07
NANOG	MO000134485	V$NANOG_Q6	0.137987	0.0642792	2.14668	0.9308	0.0162185
NEUROD1	MO000028384	V$NEUROD_02	0.665584	0.526477	1.26422	0.9719	0.0481182
NFAT5	MO000028715	V$NFAT5_Q5_01	1.02273	0.759106	1.34728	0.9057	0.00427772
NFATC1	MO000020760	V$NFAT_Q4_01	0.227273	0.116315	1.95395	0.9911	0.00601235
NFATC2	MO000026044	V$NFAT_Q4_01	0.227273	0.116315	1.95395	0.9911	0.00601235
NFATC3	MO000020739	V$NFAT_Q4_01	0.227273	0.116315	1.95395	0.9911	0.00601235
NFATC4	MO000026443	V$NFAT_Q4_01	0.227273	0.116315	1.95395	0.9911	0.00601235
NFE2	MO000089174	V$NFE2_01	0.162338	0.0642792	2.52551	0.8944	0.00285221
NFE2L1	MO000082891	V$TCF11_01	0.0974026	0.0306091	3.18214	0.9984	0.00645565
NFE2L2	MO000025668	V$MAF_Q6_01	0.219156	0.10101	2.16964	0.9278	0.00258052
NFE2L3	MO000037702	V$MAF_Q6_01	0.219156	0.10101	2.16964	0.9278	0.00258052
NFIA	MO000028708	V$NF1FAMILY_Q4	0.0324675	0.00306091	10.6071	0.9999	0.0219564
NFIB	MO000028709	V$NF1FAMILY_Q4	0.0324675	0.00306091	10.6071	0.9999	0.0219564
NFIC	MO000024750	V$NF1FAMILY_Q4	0.0324675	0.00306091	10.6071	0.9999	0.0219564
NFIX	MO000085551	V$NF1_Q6_02	0.527597	0.400979	1.31577	0.9996	0.04336
NFKB1	MO000019356,MO000019359	V$NFKAPPAB50_01,V$NFKB_Q6_01	1.68019	1.21212	1.67946	0.8717	0.00940255
NFKB2	MO000086390,MO000131473	V$NFKB_C,V$NFKB_Q6_01	1.68019	1.21212	1.38616	0.8175	0.000248074
NHLH1	MO000025841	V$HEN1_02	0.0405844	0.00612182	6.62946	0.9027	0.0193102
NHLH2	MO000025843	V$TALLIKE_Q6	6.24188	5.47597	1.13987	0.878	0.00139322
NONO	MO000056367	V$P54NRB_Q5	3.76623	3.36088	1.12061	0.7759	0.0218687
NR1H2	MO000028303	V$LXR_Q6	3.85552	3.42516	1.12565	0.7315	0.0169959
NR1H3	MO000026726	V$LXR_Q6	3.85552	3.42516	1.12565	0.7315	0.0169959
NR1H4	MO000088742	V$FXRRXR_Q5	0.137987	0.0367309	3.7567	0.9366	0.000402758
NR1I2	MO000078820	V$PXR_Q2	0.535714	0.345883	1.54883	0.9432	0.00353965
NR1I3	MO000026267	V$PXR_Q2	0.535714	0.345883	1.54883	0.9432	0.00353965
NR2C2	MO000026715	V$TR4_Q2	2.00487	1.53964	1.30217	0.8246	0.000466331
NR2F1	MO000024736	V$DR1_Q3	0.0811688	0.0244873	3.31473	0.9059	0.0108026
NR2F2	MO000024664	V$DR1_Q3	0.0811688	0.0244873	3.31473	0.9059	0.0108026
NR3C1	MO000031266	V$NR3C1_04	0.0487013	0.0122436	3.97768	0.9408	0.0307431
NR4A1	MO000026740	V$NUR77_01	1.54221	1.24273	1.24098	0.771	0.00854841
NR4A2	MO000026717	V$NURR1_Q3_01	1.62338	1.38353	1.17336	0.8724	0.0339378
NR5A1	MO000019620	V$SF1_Q5	4.52922	4.06183	1.11507	0.8683	0.0169721
OTX1	MO000026145	V$CRX_Q6	2.18344	1.88246	1.15989	0.8982	0.0239996
OTX2	MO000026148	V$OTX2_01	0.137987	0.0612182	2.25402	0.9328	0.0119637
PAX2	MO000025957	V$PAX2_02	0.811688	0.581573	1.39568	0.9969	0.00475077
PBX1	MO000042273	V$PBX_Q3	0.405844	0.189777	2.13854	0.8982	6.76164e-05
PBX2	MO000028026	V$PBX_Q3	0.405844	0.189777	2.13854	0.8982	6.76164e-05
PBX3	MO000117136	V$PBX_Q3	0.405844	0.189777	2.13854	0.8982	6.76164e-05
PGR	MO000054297	V$PR_01	1.02273	0.73768	1.38641	0.8132	0.00206242
PKNOX1	MO000028025	V$PREP1_Q3	0.0730519	0.0244873	2.98326	0.975	0.0226203
POU2AF1	MO000026191	V$OCT_Q6	3.24675	2.59871	1.24937	0.8254	0.000163184
POU2F1	MO000025003	V$OCT_C	0.665584	0.520355	1.2791	0.8185	0.040524
POU2F2	MO000035134	V$OCT_C	0.665584	0.520355	1.2791	0.8185	0.040524
POU2F3	MO000117310	V$OCT_Q6	3.24675	2.59871	1.24937	0.8254	0.000163184
POU3F2	MO000090652	V$OCT_Q6	3.24675	2.59871	1.24937	0.8254	0.000163184
POU3F3	MO000028319	V$OCT_Q6	3.24675	2.59871	1.24937	0.8254	0.000163184
POU3F4	MO000046070	V$OCT_Q6	3.24675	2.59871	1.24937	0.8254	0.000163184
POU4F1	MO000090067	V$OCT_Q6	3.24675	2.59871	1.24937	0.8254	0.000163184
POU5F1	MO000056618	V$POU5F1_04	0.178571	0.0857055	2.08355	0.8773	0.00851619
POU5F1B	MO000035139	V$OCT_Q6	3.24675	2.59871	1.24937	0.8254	0.000163184
POU6F1	MO000028320	V$POU6F1_02	0.487013	0.281604	1.72943	0.8468	0.0008239
PPARA	MO000026702	V$PPARDR1_Q2	1.95617	1.55494	1.25803	0.7745	0.00212687
PPARD	MO000026720	V$PPARDR1_Q2	1.95617	1.55494	1.25803	0.7745	0.00212687
PPARG	MO000033565	V$PPARG_02	0.113636	0.0459137	2.475	0.7337	0.0131845
RAD21	MO000042938	V$RAD21_10	4.17208	3.07316	1.35759	0.9269	1.76793e-08
RARA	MO000033904	V$RARA_09	0.430195	0.318335	1.35139	0.7403	0.0465509
RARB	MO000019618	V$RARB_02	0.827922	0.645852	1.28191	0.7133	0.0241046
RARG	MO000025130	V$RARG_Q3	2.75974	2.17325	1.26987	0.8926	0.000199878
RBPJ	MO000030964	V$RBPJK_Q4	0.738636	0.560147	1.31865	0.932	0.0194682
REL	MO000019368	V$CREL_01	0.0649351	0.0214264	3.03061	0.9896	0.0297361
RELA	MO000079319	V$NFKAPPAB_01	1.2013	0.853994	1.40668	0.86	0.000583706
REST	MO000041817	V$REST_01	0.535714	0.37037	1.44643	0.7558	0.0108286
RFX2	MO000025852	V$RFX2_05	0.454545	0.333639	1.36239	0.7996	0.0379192
RFX5	MO000025857	V$RFX5_06	0.194805	0.0918274	2.12143	0.9132	0.0052811
RUNX3	MO000026238	V$AML2_Q3_01	2.53247	2.15794	1.17356	0.9069	0.0107448
RXRA	MO000019619	V$RXRA_09	0.430195	0.296908	1.44891	0.9778	0.02008
RXRB	MO000025593	V$T3R_Q6	4.10714	3.4221	1.20018	0.9233	0.000415886
RXRG	MO000028615	V$RXRG_03	1.01461	0.658096	1.54174	0.7847	0.000101864
SATB1	MO000082144	V$SATB1_Q3	2.67045	2.3416	1.14044	0.8187	0.0257622
SHOX2	MO000117648	V$SHOX2_01	2.42695	2.0049	1.21051	0.8256	0.00375653
SMAD1	MO000019609	V$SMAD1_01	0.0405844	0.00612182	6.62946	0.9899	0.0193102
SMAD2	MO000057829	V$SMAD2_Q6	2.19156	1.75084	1.25172	0.996	0.00150961
SMAD3	MO000057832	V$SMAD3_Q6	1.31494	0.887665	1.48134	0.8685	5.24112e-05
SNAI1	MO000044348	V$SNA_Q6	0.730519	0.498929	1.46418	0.983	0.00266729
SNAI2	MO000028767	V$SLUG_Q6_01	0.933442	0.676462	1.37989	0.9366	0.00348188
SOX1	MO000042625	V$SOX_Q4	0.154221	0.0428528	3.59885	0.9984	0.000255544
SOX10	MO000028699	V$SOX_Q4	0.154221	0.0428528	3.59885	0.9984	0.000255544
SOX11	MO000026862	V$SOX_Q4	0.154221	0.0428528	3.59885	0.9984	0.000255544
SOX12	MO000026863	V$SOX_Q6	0.0568182	0.0183655	3.09375	0.9153	0.0392785
SOX13	MO000042554	V$SOX_Q4	0.154221	0.0428528	3.59885	0.9984	0.000255544
SOX14	MO000028700	V$SOX_Q6	0.0568182	0.0183655	3.09375	0.9153	0.0392785
SOX15	MO000028655	V$SOX_Q4	0.154221	0.0428528	3.59885	0.9984	0.000255544
SOX17	MO000042753	V$SOX_Q4	0.154221	0.0428528	3.59885	0.9984	0.000255544
SOX18	MO000028701	V$SOX_Q4	0.154221	0.0428528	3.59885	0.9984	0.000255544
SOX2	MO000028696	V$SOX_Q4	0.154221	0.0428528	3.59885	0.9984	0.000255544
SOX21	MO000028702	V$SOX_Q4	0.154221	0.0428528	3.59885	0.9984	0.000255544
SOX3	MO000028697	V$SOX_Q4	0.154221	0.0428528	3.59885	0.9984	0.000255544
SOX30	MO000143007	V$SOX_Q4	0.154221	0.0428528	3.59885	0.9984	0.000255544
SOX4	MO000025546	V$SOX_Q4	0.154221	0.0428528	3.59885	0.9984	0.000255544
SOX5	MO000045454	V$SOX_Q4	0.154221	0.0428528	3.59885	0.9984	0.000255544
SOX6	MO000115220	V$SOX_Q4	0.154221	0.0428528	3.59885	0.9984	0.000255544
SOX7	MO000042765	V$SOX_Q4	0.154221	0.0428528	3.59885	0.9984	0.000255544
SOX8	MO000028698	V$SOX_Q4	0.154221	0.0428528	3.59885	0.9984	0.000255544
SOX9	MO000018993	V$SOX9_B1	0.0405844	0.00612182	6.62946	0.9922	0.0193102
SP1	MO000033308	V$SP1_02	5.12987	3.9547	1.29716	0.8452	7.44437e-08
SP2	MO000046082	V$SP1_Q4_01	3.8961	3.20784	1.21456	0.909	0.00027128
SP3	MO000046079	V$SP3_Q3	1.51786	1.14172	1.32945	0.8402	0.00101688
SP4	MO000046080	V$SP1_Q6_01	3.67695	2.95378	1.24483	0.9012	8.25151e-05
SP7	MO000176655	V$OSX_Q3	2.72727	2.12121	1.28571	0.9603	0.000110674
SPI1	MO000085616	V$PU1_Q4	5.29221	4.66789	1.13375	0.8126	0.00415086
SREBF1	MO000056029	V$SREBF1_02	1.16883	0.933578	1.25199	0.7337	0.0158778
SRF	MO000013015	V$SRF_03	0.0811688	0.0153046	5.30357	0.9557	0.00171796
SRY	MO000025328	V$SOX_Q4	0.154221	0.0428528	3.59885	0.9984	0.000255544
STAT1	MO000019521	V$STAT1_01	0.113636	0.0306091	3.7125	0.906	0.00140272
STAT2	MO000013121	V$STAT_01	0.219156	0.131619	1.66507	0.9595	0.0275148
STAT3	MO000013123	V$STAT3_03	0.121753	0.0459137	2.65179	0.9685	0.00700309
STAT4	MO000019621	V$STAT_01	0.219156	0.131619	1.66507	0.9595	0.0275148
STAT5A	MO000013125	V$STAT5A_03	0.227273	0.125497	1.81098	0.9996	0.0121139
STAT5B	MO000013132	V$STAT5B_01	0.0568182	0.00918274	6.1875	0.9724	0.00612126
STAT6	MO000031956	V$STAT6_01	0.0811688	0.0306091	2.65179	1	0.0262048
TAF1	MO000081793	V$TAF1_05	5.77922	4.61892	1.25121	0.8036	6.49339e-07
TAL1	MO000032489	V$TAL1_Q6	0.146104	0.0612182	2.38661	0.9831	0.00670775
TAL2	MO000019582	V$EBOX_Q6_01	3.0763	2.66299	1.1552	0.9016	0.010869
TBP	MO000021896	V$TBP_09	0.909091	0.691766	1.31416	0.8614	0.0114505
TBX2	MO000028209	V$TBX2RELATED_Q6	0.422078	0.244873	1.72366	0.9333	0.00184598
TBX3	MO000118269	V$TBX2RELATED_Q6	0.422078	0.244873	1.72366	0.9333	0.00184598
TBX4	MO000028207	V$TBX2RELATED_Q6	0.422078	0.244873	1.72366	0.9333	0.00184598
TBX5	MO000118274	V$TBX5_01	0.0811688	0.03367	2.41071	0.9934	0.0379949
TCF12	MO000025717	V$E2A_Q6	1.84253	1.49373	1.23352	0.9673	0.00550207
TCF3	MO000032492	V$E12_Q6	1.46104	1.0805	1.35219	0.9281	0.000696128
TCF4	MO000024921	V$E2A_Q6	1.84253	1.49373	1.23352	0.9673	0.00550207
TCF7	MO000025333	V$LEF1TCF1_Q4	0.487013	0.229568	2.12143	0.9353	1.60065e-05
TCF7L1	MO000026845	V$TCF7RELATED_Q4	0.413961	0.205081	2.01852	0.9757	0.000157471
TCF7L2	MO000026882	V$TCF4_01	0.137987	0.0581573	2.37265	0.9766	0.00863813
TFAP2A	MO000001275	V$AP2ALPHA_Q6	0.0892857	0.0244873	3.64621	0.9979	0.00497746
TFAP2B	MO000026448	V$AP2_Q6_01	0.186688	0.113254	1.64841	0.9844	0.0426536
TFAP2C	MO000026449	V$AP2_Q6_01	0.186688	0.113254	1.64841	0.9844	0.0426536
TFAP4	MO000024660	V$AP4_Q6_01	0.154221	0.0795837	1.93784	0.9945	0.0225944
TFCP2	MO000117988	V$CP2_02	0.170455	0.0826446	2.0625	0.9288	0.0108153
TFE3	MO000025187	V$TFEA_Q6	1.81818	1.51515	1.2	0.8693	0.0138178
TFEB	MO000102007	V$EBOX_Q6_01	3.0763	2.66299	1.1552	0.9016	0.010869
THRA	MO000025208	V$T3R_Q6	4.10714	3.4221	1.20018	0.9233	0.000415886
THRB	MO000056537	V$T3R_Q6	4.10714	3.4221	1.20018	0.9233	0.000415886
TP53	MO000019548	V$P53_03	0.0487013	0.00612182	7.95536	0.8657	0.00692817
TP63	MO000042291	V$P53DECAMER_Q2	1.33929	0.97337	1.37593	0.9134	0.000633726
TP73	MO000028707	V$P73_Q6	0.105519	0.03367	3.13393	0.9254	0.00500075
TRIM28	MO000069886	V$TRIM28_02	2.00487	1.32231	1.51618	0.8809	1.99473e-07
TWIST1	MO000028695	V$TWIST_Q6_01	0.227273	0.104071	2.18382	0.9759	0.00203293
USF1	MO000025239	V$USF_02	7.41883	6.32997	1.17202	0.8735	4.12805e-05
USF2	MO000025243	V$USF2_Q6_01	4.58604	3.83226	1.19669	0.8356	0.000251223
VDR	MO000021495	V$VDR_Q3	6.59091	5.15458	1.27865	0.8115	8.13508e-09
ZBTB7B	MO000095587	V$CKROX_Q2	3.75812	2.98133	1.26055	0.8854	2.93354e-05
ZEB1	MO000139677	V$ZEB1_04	0.795455	0.550964	1.44375	0.907	0.00246531
ZIC1	MO000054299	V$GLI_Q3	6.64773	5.89838	1.12704	0.8831	0.00235891
ZIC2	MO000028116	V$GLI_Q3	6.64773	5.89838	1.12704	0.8831	0.00235891
ZIC3	MO000176854	V$GLI_Q3	6.64773	5.89838	1.12704	0.8831	0.00235891
ZNF219	MO000078691	V$ZNF219_01	5.56818	4.60973	1.20792	0.8044	2.77951e-05
ZNF76	MO000028757	V$ZNF76_01	2.01299	1.558	1.29203	0.7037	0.000633948

## Sheet: Supplimentary-1D
PANTHER PATHWAY ENRICHMENT OF TFs ENRICHED IN PROMOTERS OF UPREGULATED GENES OF STS
Term	Overlap	P-value	Adjusted P-value	Old P-value	Old Adjusted P-value	Odds Ratio	Combined Score	Genes
CCKR signaling map ST Homo sapiens P06959	17/165	1.2497e-10	1.39967e-08	0	0	7.52046	171.489	MEF2C;JUN;SRF;STAT3;NFATC2;FOS;FOXO3;NR2C2;FOXO1;NR4A1;SP1;MYC;SP3;CTNNB1;TCF4;PPARG;MEF2D
Interleukin signaling pathway Homo sapiens P00036	1986-12-01	2.13552e-09	1.19589e-07	0	0	10.185	203.34	STAT5A;STAT5B;SPI1;STAT1;MYC;SRF;STAT2;STAT3;STAT4;STAT6;FOS;FOXO3
PDGF signaling pathway Homo sapiens P00047	13/112	4.57696e-09	1.70873e-07	0	0	8.47237	162.688	STAT5A;STAT5B;JUN;STAT1;SRF;STAT2;STAT3;FOS;ETS1;ELF3;MYC;STAT4;STAT6
JAK/STAT signaling pathway Homo sapiens P00038	2014-06-01	1.71428e-08	4.79998e-07	0	0	31.2826	559.385	STAT5A;STAT5B;STAT1;STAT3;STAT4;STAT6
Wnt signaling pathway Homo sapiens P00057	18/278	5.9995e-08	1.34389e-06	0	0	4.72615	78.5911	SMAD1;TCF7L2;HDAC2;TCF7L1;CTBP1;HDAC1;LEF1;NFATC3;NFATC2;NFATC1;NFATC4;MYCN;MYC;HLTF;CTNNB1;EP300;TP53;PPARD
T cell activation Homo sapiens P00053	1973-08-01	6.9722e-06	0.000130148	0	0	7.9992	94.9791	JUN;NFATC3;NFATC2;NFATC1;FOS;NFKB1;NFATC4;NFKB2
B cell activation Homo sapiens P00010	1957-07-01	1.23556e-05	0.00019769	0	0	8.96402	101.306	JUN;NFATC3;NFATC2;NFATC1;FOS;NFATC4;NFKB2
Oxidative stress response Homo sapiens P00046	2024-05-01	1.5977e-05	0.000223678	0	0	15.2068	167.95	JUN;MEF2C;MAX;STAT1;MYC
TGF-beta signaling pathway Homo sapiens P00052	1988-08-01	2.79327e-05	0.000347607	0	0	6.6357	69.58	SMAD2;FOSL1;SMAD1;JUN;SMAD3;JUND;EP300;JUNB
Inflammation mediated by chemokine and cytokine signaling pathway Homo sapiens P00031	11/188	5.93173e-05	0.000664354	0	0	4.27085	41.5665	NFAT5;JUN;JUND;STAT3;NFATC3;NFATC2;NFATC1;JUNB;RELA;NFKB2;NFATC4
P53 pathway feedback loops 1 Homo sapiens P04392	2020-07-03	8.54628e-05	0.000870167	0	0	31.2826	293.037	TP53;TP63;TP73
Angiogenesis Homo sapiens P00005	9/142	0.000152353	0.00142196	0	0	4.6263	40.662	TCF7L2;JUN;STAT1;TCF7;STAT3;CTNNB1;FOS;RBPJ;ETS1
Huntington disease Homo sapiens P00029	8/124	0.000313341	0.00269955	0	0	4.70921	37.9949	JUN;TBP;SP1;EP300;FOS;TP53;TP63;TP73
p53 pathway feedback loops 2 Homo sapiens P04398	1945-05-01	0.000363175	0.0029054	0	0	8.1103	64.2387	MYC;CTNNB1;TP53;TP63;TP73
Apoptosis signaling pathway Homo sapiens P00006	7/102	0.000511656	0.00382037	0	0	5.0093	37.9598	JUN;REL;FOS;TP53;NFKB1;RELA;NFKB2
EGF receptor signaling pathway Homo sapiens P00018	7/109	0.000761382	0.00532967	0	0	4.6876	33.6588	STAT5A;STAT5B;STAT1;STAT2;STAT3;STAT4;STAT6
Ras Pathway Homo sapiens P04393	1969-05-01	0.0025596	0.0168632	0	0	5.28933	31.5662	JUN;STAT1;SRF;STAT3;ETS1
p53 pathway by glucose deprivation Homo sapiens P04397	2021-03-01	0.00281764	0.017532	0	0	10.4275	61.2289	TP53;TP63;TP73
p53 pathway Homo sapiens P00059	1971-05-01	0.0029005	0.0170977	0	0	5.14033	30.0343	HDAC1;EP300;TP53;TP63;TP73
Toll receptor signaling pathway Homo sapiens P00054	1949-04-01	0.00450089	0.025205	0	0	5.95859	32.1971	JUN;IRF3;RELA;NFKB2
Vitamin D metabolism and pathway Homo sapiens P04396	2020-08-02	0.00495858	0.0264457	0	0	18.2482	96.8364	RXRA;VDR
Axon guidance mediated by netrin Homo sapiens P00009	1930-03-01	0.00785626	0.0399955	0	0	7.29927	35.3755	NFATC3;NFATC2;NFATC4
p38 MAPK pathway Homo sapiens P05918	1932-03-01	0.00940724	0.0458092	0	0	6.84307	31.9316	MEF2C;SRF;MEF2D
Alzheimer disease-presenilin pathway Homo sapiens P00004	1999-05-01	0.0117129	0.0546602	0	0	3.6865	16.3941	TCF7L2;TCF7L1;LEF1;CTNNB1;RBPJ
Transcription regulation by bZIP transcription factor Homo sapiens P00055	1942-03-01	0.0197043	0.0882751	0	0	5.21376	20.474	TBP;GTF2B;EP300
PI3 kinase pathway Homo sapiens P00048	1942-03-01	0.0197043	0.0848799	0	0	5.21376	20.474	FOXO4;FOXO3;FOXO1
Hedgehog signaling pathway Homo sapiens P00025	2018-02-01	0.0247628	0.10272	0	0	8.1103	29.9952	GLI1;GLI3
Insulin/IGF pathway-protein kinase B signaling cascade Homo sapiens P00033	1934-02-01	0.0787897	0.315159	0	0	4.29369	10.9101	FOXO3;FOXO1
Circadian clock system Homo sapiens P00015	2020-08-01	0.104503	0.403599	0	0	9.12409	20.6071	CLOCK
Cadherin signaling pathway Homo sapiens P00012	4/150	0.151048	0.563914	0	0	1.94647	3.67913	TCF7L2;TCF7L1;LEF1;CTNNB1
General transcription by RNA polymerase I Homo sapiens P00022	2015-01-01	0.186975	0.675522	0	0	4.86618	8.15952	TBP
Interferon-gamma signaling pathway Homo sapiens P00035	2028-01-01	0.320579	1	0	0	2.60688	2.96566	STAT1
General transcription regulation Homo sapiens P00023	2028-01-01	0.320579	1	0	0	2.60688	2.96566	GTF2B
Insulin/IGF pathway-mitogen activated protein kinase kinase/MAP kinase cascade Homo sapiens P00032	2029-01-01	0.3299	1	0	0	2.51699	2.79126	FOS
FAS signaling pathway Homo sapiens P00020	1931-01-01	0.348162	1	0	0	2.3546	2.48432	JUN
Notch signaling pathway Homo sapiens P00045	1938-01-01	0.408259	1	0	0	1.92086	1.72081	RBPJ
VEGF signaling pathway Homo sapiens P00056	1954-01-01	0.525697	1	0	0	1.35172	0.869195	ETS1

## Sheet: Supplementary-1E
Validation dataset1 - LIMMA OF TCGA-GBM microarray Dataset
ID	logFC	CI.025	CI.975	AveExpr	t	P.Value	adj.P.Val	B	modLog10P	signLog10P
EFEMP2	1.06648	0.766078	1.36688	8.57944	6.98448	1.64714e-11	2.29183e-07	15.4717	10.7833	10.7833
LDB1	-0.408359	-0.537772	-0.278946	6.28346	-6.20798	1.65384e-09	1.15058e-05	11.2017	8.78151	-8.78151
FMOD	1.17402	0.791434	1.5566	6.38249	6.03716	4.32096e-09	2.00406e-05	10.314	8.36442	8.36442
MSN	0.771133	0.515793	1.02647	9.96954	5.94149	7.33425e-09	2.55122e-05	9.82539	8.13464	8.13464
SERPING1	1.18093	0.785052	1.57681	8.38528	5.86878	1.0918e-08	3.03827e-05	9.45816	7.96185	7.96185
C1R	1.14065	0.75115	1.53014	9.12927	5.76145	1.95102e-08	3.87808e-05	8.92266	7.70974	7.70974
CHL1	1.4988	0.987456	2.01014	8.35449	5.76655	1.89833e-08	3.87808e-05	8.94791	7.72163	7.72163
PDPN	1.47083	0.961536	1.98012	9.10459	5.68171	2.98733e-08	5.19572e-05	8.52994	7.52472	7.52472
PINLYP	0.908012	0.582977	1.23305	6.62626	5.49599	7.91634e-08	0.000110148	7.63253	7.10148	7.10148
WWTR1	0.789073	0.507126	1.07102	10.4712	5.50599	7.51657e-08	0.000110148	7.68021	7.12398	7.12398
SLC35G2	0.839843	0.536326	1.14336	7.9705	5.44377	1.03652e-07	0.00013111	7.38459	6.98442	6.98442
MSRB2	-0.453823	-0.619013	-0.288633	8.67968	-5.40489	1.26522e-07	0.000146702	7.20125	6.89783	-6.89783
DYNLT3	0.692954	0.436301	0.949608	9.89877	5.31181	2.03006e-07	0.000217279	6.76673	6.69249	6.69249
CTBP2	-0.350172	-0.482584	-0.217761	9.88309	-5.20285	3.50208e-07	0.000279156	6.26612	6.45567	-6.45567
HCRTR2	-0.168696	-0.232059	-0.105333	4.01873	-5.23784	2.94231e-07	0.000279156	6.42595	6.53131	-6.53131
LGALS8	0.592272	0.36911	0.815434	7.42552	5.22138	3.19387e-07	0.000279156	6.35065	6.49568	6.49568
SLC2A10	0.872924	0.541834	1.20401	7.56976	5.18698	3.78884e-07	0.000279156	6.19391	6.42149	6.42149
SLC43A3	0.593148	0.36812	0.818176	7.16639	5.18575	3.81196e-07	0.000279156	6.18833	6.41885	6.41885
TP73-AS1	0.724161	0.45065	0.997673	6.79395	5.20888	3.39878e-07	0.000279156	6.29359	6.46868	6.46868
TIMP1	0.917809	0.567967	1.26765	11.5607	5.16138	4.3e-07	0.000299151	6.07782	6.36653	6.36653
SEC61G	0.980464	0.603803	1.35712	11.4234	5.12113	5.24111e-07	0.000347261	5.89634	6.28058	6.28058
ANKRD26	-0.243404	-0.337494	-0.149315	4.3582	-5.08945	6.11965e-07	0.000370212	5.75429	6.21327	-6.21327
C1RL	0.855393	0.525228	1.18556	6.10782	5.09705	5.89681e-07	0.000370212	5.78829	6.22938	6.22938
ZIC3	-0.289803	-0.402443	-0.177164	4.19082	-5.06171	7.00458e-07	0.00040609	5.63054	6.15462	-6.15462
C1S	1.07357	0.653822	1.49332	9.39713	5.03182	8.09652e-07	0.000433288	5.49784	6.0917	6.0917
SLC25A20	0.55867	0.340442	0.776898	6.94923	5.0365	7.91527e-07	0.000433288	5.51857	6.10153	6.10153
F3	0.822419	0.497723	1.14711	8.99259	4.98312	1.02375e-06	0.00052757	5.28303	5.98981	5.98981
CHI3L1	1.68666	1.01923	2.35409	11.6466	4.97173	1.0812e-06	0.000533817	5.23305	5.96609	5.96609
CPQ	0.571887	0.345057	0.798717	7.38931	4.96014	1.14287e-06	0.000533817	5.18229	5.942	5.942
TAF5	-0.476449	-0.665482	-0.287417	5.85561	-4.95866	1.15096e-06	0.000533817	5.17583	5.93894	-5.93894
MLNR	-0.108489	-0.151821	-0.0651575	3.49316	-4.92565	1.34715e-06	0.000604655	5.03184	5.87058	-5.87058
IL1RAP	0.949762	0.568869	1.33065	7.97632	4.90566	1.4813e-06	0.000644087	4.94503	5.82936	5.82936
CSRP1	0.683162	0.405878	0.960446	10.2516	4.84713	1.95233e-06	0.000798933	4.69264	5.70945	5.70945
DUS2	-0.24079	-0.338888	-0.142693	6.2553	-4.8291	2.12452e-06	0.000798933	4.61542	5.67274	-5.67274
MEIS3P1	0.696726	0.41309	0.980362	6.94987	4.83266	2.0894e-06	0.000798933	4.63065	5.67998	5.67998
MEIS3P2	0.696726	0.41309	0.980362	6.94987	4.83266	2.0894e-06	0.000798933	4.63065	5.67998	5.67998
MYH7	-0.232235	-0.326518	-0.137953	4.11327	-4.84598	1.96283e-06	0.000798933	4.68774	5.70712	-5.70712
LINC00843	-0.414888	-0.584334	-0.245442	7.4285	-4.81709	2.24721e-06	0.000802301	4.56414	5.64836	-5.64836
RPRM	-0.739918	-1.04212	-0.437716	5.86638	-4.81694	2.24879e-06	0.000802301	4.56349	5.64805	-5.64805
CEBPD	0.63245	0.373257	0.891643	10.6737	4.80051	2.42795e-06	0.000829587	4.49349	5.61476	5.61476
CEP112	0.382648	0.225634	0.539662	5.51038	4.79453	2.49656e-06	0.000829587	4.46804	5.60266	5.60266
RANBP17	-0.27492	-0.387744	-0.162095	3.94553	-4.79387	2.50414e-06	0.000829587	4.46527	5.60134	-5.60134
TFDP2	-0.543872	-0.768776	-0.318968	7.16737	-4.75757	2.9636e-06	0.000958967	4.31149	5.52818	-5.52818
GREB1L	-0.283073	-0.401056	-0.16509	4.34259	-4.72024	3.5203e-06	0.00111322	4.15443	5.45342	-5.45342
AEBP1	0.971786	0.56455	1.37902	9.12641	4.69471	3.95766e-06	0.00114723	4.04763	5.40256	5.40256
FKBP9	0.570295	0.331506	0.809084	9.5366	4.69861	3.8875e-06	0.00114723	4.06394	5.41033	5.41033
FKBP9P1	0.570295	0.331506	0.809084	9.5366	4.69861	3.8875e-06	0.00114723	4.06394	5.41033	5.41033
SHANK1	-0.196791	-0.279126	-0.114456	4.04905	-4.70224	3.8234e-06	0.00114723	4.0791	5.41755	-5.41755
ZBTB32	-0.208763	-0.296346	-0.12118	3.96959	-4.68942	4.05466e-06	0.00115136	4.02555	5.39205	-5.39205
TRIP6	0.651859	0.377934	0.925783	8.25136	4.68174	4.19933e-06	0.00116859	3.99359	5.37682	5.37682
IQCG	0.755145	0.437265	1.07302	7.34563	4.67361	4.35821e-06	0.00118902	3.95974	5.36069	5.36069
STAT3	0.403427	0.232796	0.574059	10.1627	4.65148	4.81997e-06	0.00128971	3.86795	5.31696	5.31696
DUSP6	0.704873	0.406181	1.00357	9.52166	4.64271	5.01586e-06	0.00129242	3.83165	5.29965	5.29965
IGFBP2	1.09838	0.633025	1.56374	10.2465	4.64357	4.99639e-06	0.00129242	3.8352	5.30134	5.30134
EMP3	0.993114	0.571356	1.41487	9.70205	4.63255	5.25228e-06	0.00132837	3.78969	5.27965	5.27965
IL6ST	0.41147	0.23643	0.586511	10.7247	4.62472	5.44181e-06	0.00132837	3.7574	5.26426	5.26426
PDSS1	-0.444179	-0.633	-0.255358	6.12705	-4.62799	5.3617e-06	0.00132837	3.77091	5.2707	-5.2707
MTSS1L	-0.227246	-0.324051	-0.130441	3.98132	-4.61832	5.60149e-06	0.00134378	3.73106	5.2517	-5.2517
TWNK	-0.400882	-0.571881	-0.229882	6.15498	-4.61219	5.75868e-06	0.00135807	3.70585	5.23968	-5.23968
DIRAS3	1.04119	0.594025	1.48836	6.76059	4.58085	6.63087e-06	0.0015377	3.57745	5.17843	5.17843
RBP1	1.08325	0.614521	1.55197	9.70334	4.54667	7.72678e-06	0.00176247	3.43826	5.112	5.112
PPP2R2D	-0.282822	-0.405424	-0.16022	5.97239	-4.53838	8.01786e-06	0.00179936	3.40461	5.09594	-5.09594
HMX1	-0.316418	-0.453763	-0.179073	4.39133	-4.53246	8.23191e-06	0.00181808	3.38065	5.0845	-5.0845
H2AFY2	-0.54968	-0.78878	-0.310581	4.82543	-4.52289	8.58966e-06	0.00186745	3.34196	5.06602	-5.06602
DDX50	-0.298878	-0.429798	-0.167959	7.93835	-4.49132	9.87911e-06	0.0020827	3.2148	5.00528	-5.00528
GNG12	0.498578	0.280201	0.716955	9.53054	4.4917	9.8629e-06	0.0020827	3.21629	5.006	5.006
CUTC	-0.376367	-0.54196	-0.210774	6.91744	-4.47151	1.07811e-05	0.00220601	3.13539	4.96734	-4.96734
PTGES2	-0.240802	-0.346712	-0.134891	6.68916	-4.47307	1.07075e-05	0.00220601	3.14162	4.97031	-4.97031
HSP90B1	0.338904	0.189583	0.488226	10.749	4.46519	1.10851e-05	0.00223534	3.11012	4.95526	4.95526
CCL2	1.21011	0.673654	1.74657	9.19049	4.43787	1.24965e-05	0.00248395	3.00126	4.90321	4.90321
DCTD	0.376087	0.209234	0.542941	8.46623	4.43443	1.26858e-05	0.00248606	2.98761	4.89668	4.89668
PPIB	0.370642	0.205814	0.535471	11.47	4.42393	1.32812e-05	0.0025412	2.94596	4.87676	4.87676
RUBCNL	0.757492	0.420431	1.09455	6.87127	4.42135	1.34318e-05	0.0025412	2.93573	4.87187	4.87187
STEAP3	0.740248	0.410755	1.06974	6.85446	4.41993	1.35151e-05	0.0025412	2.93011	4.86918	4.86918
SLCO5A1	-0.218629	-0.316282	-0.120976	4.166	-4.40461	1.44478e-05	0.00268036	2.86953	4.8402	-4.8402
FZD7	0.829023	0.45767	1.20038	7.57888	4.39202	1.52603e-05	0.00277746	2.81988	4.81644	4.81644
TXNDC15	0.328827	0.181476	0.476177	8.53253	4.39036	1.53705e-05	0.00277746	2.81336	4.81331	4.81331
MXD1	-0.15344	-0.222298	-0.0845813	3.67909	-4.38396	1.58032e-05	0.00281905	2.78816	4.80125	-4.80125
CHSY1	0.430855	0.23719	0.62452	9.04426	4.37687	1.62953e-05	0.00287004	2.76034	4.78794	4.78794
MCFD2	0.283807	0.156121	0.411493	9.27697	4.37284	1.6582e-05	0.00288402	2.74452	4.78036	4.78036
TAL1	-0.330016	-0.479125	-0.180908	4.35253	-4.35429	1.79643e-05	0.00308586	2.6719	4.74559	-4.74559
CISD1	-0.335636	-0.48768	-0.183592	9.35575	-4.34294	1.88644e-05	0.00315539	2.62757	4.72436	-4.72436
IFNGR2	0.349194	0.191011	0.507376	8.95022	4.34304	1.88564e-05	0.00315539	2.62796	4.72454	4.72454
TRIP4	0.499533	0.273125	0.725941	7.19566	4.34067	1.90494e-05	0.00315539	2.61873	4.72012	4.72012
BZW1	0.289918	0.158177	0.42166	10.9042	4.3295	1.99854e-05	0.00321912	2.57525	4.69929	4.69929
FAM189B	-0.267834	-0.38954	-0.146129	7.10609	-4.32953	1.9983e-05	0.00321912	2.57535	4.69934	-4.69934
IQSEC2	-0.301563	-0.4389	-0.164226	4.63382	-4.31993	2.08223e-05	0.00321912	2.53807	4.68147	-4.68147
PAMR1	0.793722	0.43235	1.15509	8.11462	4.32114	2.07142e-05	0.00321912	2.54278	4.68373	4.68373
PAQR5	-0.147951	-0.215314	-0.080587	3.90126	-4.32091	2.07343e-05	0.00321912	2.54191	4.68331	-4.68331
PDGFA	0.825137	0.449457	1.20082	8.43187	4.32109	2.07191e-05	0.00321912	2.54257	4.68363	4.68363
PMP22	0.635146	0.34561	0.924682	11.2618	4.31574	2.11986e-05	0.00322881	2.52184	4.67369	4.67369
SMC3	-0.443935	-0.646383	-0.241486	8.30257	-4.31409	2.13491e-05	0.00322881	2.51543	4.67062	-4.67062
SCG5	1.00521	0.545448	1.46498	10.0673	4.30137	2.25415e-05	0.00333662	2.46618	4.64702	4.64702
SEPHS1	-0.390344	-0.56887	-0.211819	7.81837	-4.30162	2.25171e-05	0.00333662	2.46717	4.64749	-4.64749
FBLN5	0.910441	0.492679	1.3282	6.97571	4.28753	2.39104e-05	0.003502	2.41278	4.62141	4.62141
LGALS3	0.829511	0.448131	1.21089	11.6244	4.27907	2.47864e-05	0.00355544	2.3802	4.60579	4.60579
MTPAP	-0.394756	-0.576243	-0.213269	6.6186	-4.27925	2.47676e-05	0.00355544	2.38088	4.60612	-4.60612
ACTR5	-0.299849	-0.438186	-0.161511	5.91374	-4.26429	2.63914e-05	0.00374705	2.32339	4.57854	-4.57854
PHF11	0.538278	0.289134	0.787423	8.58667	4.2505	2.79764e-05	0.00393196	2.2706	4.55321	4.55321
CHST2	0.644225	0.345352	0.943099	8.31	4.24068	2.91618e-05	0.00401739	2.23304	4.53519	4.53519
NAMPT	0.774795	0.41547	1.13412	10.5208	4.24213	2.89833e-05	0.00401739	2.2386	4.53785	4.53785
CAST	0.406277	0.217192	0.595362	9.31111	4.22717	3.08696e-05	0.00421098	2.18155	4.51047	4.51047
PARVA	0.425246	0.226785	0.623707	7.79626	4.21552	3.24191e-05	0.00437941	2.13725	4.4892	4.4892
PCBP3	-0.24697	-0.362372	-0.131568	4.39994	-4.21033	3.31323e-05	0.00443272	2.11757	4.47975	-4.47975
EIF4EBP2	-0.287432	-0.42185	-0.153013	6.9265	-4.20688	3.3615e-05	0.00445447	2.10449	4.47347	-4.47347
TMBIM1	0.449993	0.239392	0.660593	8.48455	4.2037	3.40667e-05	0.00447174	2.09242	4.46767	4.46767
CHMP2A	0.326113	0.173392	0.478833	10.239	4.20102	3.44505e-05	0.00447985	2.08229	4.46281	4.46281
NAMPTP1	0.790661	0.418873	1.16245	10.4466	4.18388	3.70088e-05	0.00476796	2.01754	4.4317	4.4317
GIT1	-0.22983	-0.338407	-0.121253	5.95154	-4.1644	4.01367e-05	0.00512351	1.94422	4.39646	-4.39646
LAP3	0.416741	0.219664	0.613819	10.3614	4.1602	4.08443e-05	0.00516643	1.92843	4.38887	4.38887
ACSS3	0.792374	0.415753	1.16899	6.5371	4.13914	4.45697e-05	0.0053128	1.84959	4.35096	4.35096
AK4	0.580356	0.304355	0.856357	9.00908	4.13685	4.49955e-05	0.0053128	1.84101	4.34683	4.34683
AK4P1	0.580356	0.304355	0.856357	9.00908	4.13685	4.49955e-05	0.0053128	1.84101	4.34683	4.34683
AK4P3	0.580356	0.304355	0.856357	9.00908	4.13685	4.49955e-05	0.0053128	1.84101	4.34683	4.34683
C19orf66	0.419566	0.219875	0.619257	8.63581	4.13358	4.56069e-05	0.0053128	1.82882	4.34097	4.34097
CLIP1	0.322561	0.168789	0.476333	8.67428	4.12686	4.68899e-05	0.0053128	1.80377	4.32892	4.32892
DDX6	-0.265142	-0.391493	-0.138792	4.76112	-4.12844	4.65847e-05	0.0053128	1.80967	4.33176	-4.33176
ECD	-0.338956	-0.499692	-0.178221	7.09688	-4.14875	4.2831e-05	0.0053128	1.88553	4.36824	-4.36824
FAM13C	-0.175761	-0.259246	-0.0922766	3.73323	-4.14192	4.40613e-05	0.0053128	1.85995	4.35594	-4.35594
GBP1P1	0.818298	0.428891	1.2077	9.243	4.13422	4.54874e-05	0.0053128	1.83119	4.34211	4.34211
HSPA5	0.368536	0.192866	0.544205	11.5629	4.12733	4.68005e-05	0.0053128	1.80549	4.32975	4.32975
MDK	0.724495	0.380707	1.06828	7.65247	4.146	4.33225e-05	0.0053128	1.87522	4.36329	4.36329
VPS53	-0.145867	-0.215412	-0.0763226	4.06436	-4.12647	4.69652e-05	0.0053128	1.80232	4.32822	-4.32822
LARP4B	-0.364017	-0.537755	-0.190279	5.86928	-4.12204	4.78317e-05	0.00536718	1.78582	4.32028	-4.32028
DCLRE1B	-0.259351	-0.383198	-0.135503	5.61623	-4.11987	4.82619e-05	0.00537213	1.77774	4.31639	-4.31639
B2M	0.247011	0.128985	0.365036	13.323	4.11742	4.87517e-05	0.00538358	1.76862	4.31201	4.31201
GBP1	0.815281	0.425371	1.20519	9.24545	4.11365	4.95133e-05	0.00542463	1.75463	4.30528	4.30528
REM1	-0.266134	-0.393571	-0.138697	4.91295	-4.10856	5.05615e-05	0.00549619	1.73573	4.29618	-4.29618
NMI	0.487875	0.254139	0.721612	8.09545	4.10646	5.10007e-05	0.00550096	1.72792	4.29242	4.29242
PI15	-0.17533	-0.259373	-0.0912877	3.69945	-4.10433	5.14491e-05	0.00550663	1.72002	4.28862	-4.28862
BST2	0.751715	0.390176	1.11325	7.14811	4.09056	5.4439e-05	0.00576168	1.66906	4.26409	4.26409
TNFAIP6	0.945078	0.490431	1.39973	8.02852	4.08957	5.46602e-05	0.00576168	1.6654	4.26233	4.26233
GFRA1	-0.232091	-0.343814	-0.120368	3.97067	-4.08695	5.52509e-05	0.00577755	1.6557	4.25766	-4.25766
PTX3	1.22878	0.637024	1.82053	7.41977	4.08523	5.56412e-05	0.00577755	1.64935	4.2546	4.2546
DHRS2	-0.438489	-0.64986	-0.227117	4.41152	-4.08129	5.65465e-05	0.00582217	1.6348	4.24759	-4.24759
HIST3H2A	-0.826056	-1.22458	-0.427533	7.40489	-4.07794	5.73263e-05	0.00582217	1.62245	4.24165	-4.24165
TCTN1	0.381021	0.19728	0.564763	6.36057	4.07968	5.69187e-05	0.00582217	1.62888	4.24474	4.24474
FBXO17	0.488242	0.252288	0.724196	6.05493	4.07092	5.89934e-05	0.00582587	1.5966	4.2292	4.2292
2008-03-01	-0.463998	-0.688139	-0.239858	6.72405	-4.07268	5.85698e-05	0.00582587	1.60309	4.23233	-4.23233
PLA2G5	1.21559	0.62815	1.80302	7.34783	4.07109	5.89529e-05	0.00582587	1.59721	4.2295	4.2295
PPP1CB	0.290412	0.150057	0.430767	10.2857	4.07074	5.90375e-05	0.00582587	1.59592	4.22887	4.22887
C5orf15	0.251851	0.130062	0.37364	9.58321	4.06837	5.96107e-05	0.00584101	1.58721	4.22468	4.22468
TMEM176B	0.888372	0.457384	1.31936	8.50825	4.05522	6.28915e-05	0.00611939	1.53891	4.20141	4.20141
LGSN	-0.19969	-0.296922	-0.102458	3.60735	-4.04048	6.67725e-05	0.0064074	1.48494	4.1754	-4.1754
SWAP70	0.450254	0.231108	0.669401	8.03028	4.04211	6.63326e-05	0.0064074	1.4909	4.17827	4.17827
PRH1	-0.15517	-0.230956	-0.0793839	3.82365	-4.02812	7.02013e-05	0.00659987	1.43983	4.15365	-4.15365
PRH2	-0.15517	-0.230956	-0.0793839	3.82365	-4.02812	7.02013e-05	0.00659987	1.43983	4.15365	-4.15365
SIRT4	-0.201579	-0.300012	-0.103146	4.02628	-4.02892	6.99759e-05	0.00659987	1.44273	4.15505	-4.15505
AMH	-0.232737	-0.346478	-0.118995	4.09295	-4.0256	7.09225e-05	0.00662293	1.43062	4.14922	-4.14922
CPSF1	-0.286368	-0.426553	-0.146183	7.42971	-4.0189	7.28693e-05	0.0067146	1.40623	4.13746	-4.13746
MIR939	-0.286368	-0.426553	-0.146183	7.42971	-4.0189	7.28693e-05	0.0067146	1.40623	4.13746	-4.13746
IMPACT	0.357879	0.182239	0.533519	6.77973	4.00865	7.5948e-05	0.00695224	1.36897	4.11948	4.11948
HFE	0.395688	0.201358	0.590019	6.28008	4.00587	7.68035e-05	0.0069846	1.35888	4.11462	4.11462
CBLIF	-0.153682	-0.229209	-0.0781542	3.77742	-4.00315	7.7648e-05	0.00701554	1.34903	4.10987	-4.10987
CSTF2	-0.270561	-0.403636	-0.137486	6.57066	-3.99995	7.86557e-05	0.00706074	1.33743	4.10427	-4.10427
KNOP1	-0.372601	-0.556096	-0.189106	6.4581	-3.99489	8.02707e-05	0.00715953	1.31913	4.09544	-4.09544
XKR8	0.259811	0.131805	0.387818	7.19736	3.99311	8.08484e-05	0.00716513	1.31267	4.09233	4.09233
TMBIM6	0.24288	0.123048	0.362711	11.2182	3.98754	8.26778e-05	0.00728088	1.29253	4.08261	4.08261
GRM8	-0.201898	-0.30175	-0.102046	4.02586	-3.97796	8.59154e-05	0.00749199	1.25797	4.06593	-4.06593
PRDM8	-0.129432	-0.193456	-0.0654085	3.56164	-3.97728	8.6152e-05	0.00749199	1.25549	4.06473	-4.06473
FAM172A	0.354315	0.178806	0.529824	8.99785	3.97169	8.80993e-05	0.00752033	1.23538	4.05503	4.05503
MYD88	0.373389	0.188439	0.558338	8.46347	3.97185	8.80424e-05	0.00752033	1.23597	4.05531	4.05531
RNU6-172P	-0.165188	-0.246992	-0.0833849	3.95693	-3.97276	8.77239e-05	0.00752033	1.23923	4.05688	-4.05688
ATP13A3	0.347186	0.174755	0.519618	7.7105	3.96124	9.18581e-05	0.00765337	1.1978	4.03688	4.03688
RNU1-123P	0.768913	0.387164	1.15066	6.36433	3.96263	9.13487e-05	0.00765337	1.2028	4.0393	4.0393
TPPP3	0.768913	0.387164	1.15066	6.36433	3.96263	9.13487e-05	0.00765337	1.2028	4.0393	4.0393
ZSWIM8	-0.322245	-0.482265	-0.162226	7.30315	-3.96186	9.16315e-05	0.00765337	1.20002	4.03796	-4.03796
LDHA	0.438773	0.220547	0.656999	12.5107	3.95565	9.39295e-05	0.00773335	1.17774	4.0272	4.0272
NEUROG1	-0.141756	-0.212237	-0.0712751	3.87884	-3.95689	9.34662e-05	0.00773335	1.18219	4.02935	-4.02935
IGFBP5	0.703148	0.353259	1.05304	11.6163	3.95367	9.46734e-05	0.00774874	1.17065	4.02377	4.02377
HBZ	-0.309616	-0.464219	-0.155013	3.74629	-3.93995	9.99886e-05	0.00808862	1.12154	4.00005	-4.00005
HBZP1	-0.309616	-0.464219	-0.155013	3.74629	-3.93995	9.99886e-05	0.00808862	1.12154	4.00005	-4.00005
GPRASP1	0.65475	0.327565	0.981935	7.34815	3.93701	0.000101163	0.00813634	1.11104	3.99498	3.99498
CLEC5A	0.803557	0.401501	1.20561	6.39147	3.93201	0.000103192	0.00816098	1.09319	3.98635	3.98635
FGFR3	1.07266	0.536319	1.609	7.9994	3.93464	0.00010212	0.00816098	1.10257	3.99089	3.99089
RECQL4	-0.252569	-0.378944	-0.126194	4.8533	-3.93192	0.000103229	0.00816098	1.09287	3.9862	-3.9862
ERAP1	0.511511	0.255243	0.767779	7.63003	3.92686	0.000105324	0.0082795	1.07482	3.97748	3.97748
SMAD7	-0.405781	-0.609392	-0.20217	5.9913	-3.9208	0.000107882	0.00843297	1.05325	3.96705	-3.96705
ALDH1L1	0.864999	0.429626	1.30037	7.21253	3.90876	0.000113146	0.00857315	1.01044	3.94636	3.94636
DNAJC28	-0.146992	-0.220977	-0.0730066	4.36524	-3.9087	0.00011317	0.00857315	1.01026	3.94627	-3.94627
DRAM1	0.541691	0.269224	0.814159	6.95523	3.91131	0.000112011	0.00857315	1.0195	3.95074	3.95074
MAOB	0.966794	0.480814	1.45277	10.0123	3.91381	0.000110907	0.00857315	1.0284	3.95504	3.95504
MTAP	-0.285474	-0.429006	-0.141942	4.3483	-3.91293	0.000111295	0.00857315	1.02526	3.95352	-3.95352
PLOD2	0.540591	0.268464	0.812717	9.56205	3.90825	0.000113372	0.00857315	1.00865	3.94549	3.94549
ATP1B4	-0.104942	-0.157861	-0.0520235	3.38482	-3.90145	0.000116457	0.00873824	0.984537	3.93383	-3.93383
PHLDA3	0.316214	0.156727	0.475701	5.52325	3.90068	0.000116811	0.00873824	0.98181	3.93251	3.93251
AKAP6	-0.351031	-0.528562	-0.173501	4.5602	-3.89007	0.000121795	0.00887257	0.944289	3.91437	-3.91437
MT1M	1.04212	0.515287	1.56896	9.13726	3.8916	0.000121064	0.00887257	0.949699	3.91699	3.91699
PLXNC1	0.479478	0.237013	0.721944	7.45025	3.89048	0.000121599	0.00887257	0.945737	3.91507	3.91507
POSTN	1.7645	0.872264	2.65673	8.591	3.89069	0.000121497	0.00887257	0.946492	3.91543	3.91543
TLX3	-0.122554	-0.184514	-0.0605944	3.54715	-3.89137	0.000121173	0.00887257	0.948888	3.91659	-3.91659
TIMM23B	-0.404116	-0.608591	-0.199641	7.23823	-3.88822	0.000122686	0.00889091	0.937746	3.9112	-3.9112
EIF4G2	0.302133	0.149047	0.455218	11.4911	3.88283	0.000125315	0.00901279	0.918712	3.902	3.902
TSPAN15	-0.331154	-0.499019	-0.163288	4.92884	-3.88107	0.00012618	0.00901279	0.912538	3.89901	-3.89901
ZMAT3	0.605767	0.298675	0.912859	8.36001	3.88081	0.000126311	0.00901279	0.911604	3.89856	3.89856
HBQ1	-0.20378	-0.307456	-0.100105	4.06501	-3.86697	0.000133357	0.00941896	0.862883	3.87498	-3.87498
LTF	1.68035	0.825678	2.53502	8.29342	3.868	0.00013282	0.00941896	0.866504	3.87674	3.87674
SIPA1L1	0.470662	0.23111	0.710215	7.44717	3.8654	0.000134177	0.009429	0.857384	3.87232	3.87232
NCOA4	-0.253038	-0.38189	-0.124187	10.775	-3.8635	0.000135178	0.00944911	0.850718	3.8691	-3.8691
TOP3B	-0.157239	-0.237333	-0.0771449	4.16977	-3.86229	0.000135822	0.00944911	0.846454	3.86703	-3.86703
DPYD	0.751766	0.368676	1.13486	8.60781	3.8607	0.000136666	0.00946053	0.840895	3.86434	3.86434
PJA2	0.38293	0.187718	0.578142	10.05	3.85921	0.000137468	0.00946897	0.835642	3.8618	3.8618
RB1	0.424478	0.207991	0.640964	8.90504	3.85753	0.000138372	0.00948427	0.829763	3.85895	3.85895
MEOX2	1.2262	0.60027	1.85213	6.58143	3.85407	0.000140254	0.00951947	0.817645	3.85309	3.85309
PPP1R37	-0.15441	-0.233208	-0.0756131	4.07235	-3.85523	0.000139622	0.00951947	0.821693	3.85505	-3.85505
IL10RB	0.373737	0.18264	0.564833	7.52605	3.84766	0.000143807	0.00966632	0.795205	3.84222	3.84222
PLSCR1	0.560819	0.274126	0.847512	9.24211	3.8485	0.00014334	0.00966632	0.798119	3.84363	3.84363
GALC	0.581143	0.283745	0.87854	8.60051	3.84441	0.00014564	0.00974249	0.783843	3.83672	3.83672
ADRA1A	-0.198675	-0.300489	-0.0968604	3.9851	-3.839	0.000148742	0.00990237	0.764944	3.82757	-3.82757
MUC6	-0.130072	-0.196772	-0.0633716	3.9023	-3.83655	0.000150166	0.00994957	0.7564	3.82343	-3.82343
PARD3	-0.416972	-0.630929	-0.203015	7.55054	-3.83412	0.000151597	0.00999679	0.747895	3.81931	-3.81931
GALR2	-0.112716	-0.17062	-0.0548117	3.47785	-3.82967	0.000154242	0.0101232	0.732389	3.8118	-3.8118
ATP2B1	0.425672	0.206698	0.644647	8.52867	3.82443	0.000157408	0.0101397	0.714174	3.80297	3.80297
LIN28A	-0.254922	-0.385992	-0.123851	3.56199	-3.82637	0.00015623	0.0101397	0.720908	3.80624	-3.80624
NAAA	0.390068	0.189427	0.590708	5.38055	3.82478	0.000157197	0.0101397	0.715376	3.80356	3.80356
PRM2	-0.105288	-0.15944	-0.0511367	3.58943	-3.82519	0.000156946	0.0101397	0.716806	3.80425	-3.80425
CD44	0.604026	0.293019	0.915034	11.2636	3.82094	0.000159557	0.0102307	0.702022	3.79709	3.79709
CYP2E1	-0.306737	-0.4648	-0.148674	4.19527	-3.81787	0.000161468	0.0102364	0.691351	3.79191	-3.79191
GEMIN7	-0.111882	-0.169541	-0.0542225	3.95379	-3.81747	0.000161719	0.0102364	0.689959	3.79124	-3.79124
TRIB2	0.733586	0.355505	1.11167	9.08763	3.81725	0.000161852	0.0102364	0.68922	3.79088	3.79088
MYH6	-0.186875	-0.283222	-0.0905279	3.79345	-3.81591	0.000162699	0.0102434	0.684544	3.78862	-3.78862
COX15	-0.29721	-0.450661	-0.14376	6.96189	-3.81048	0.000166154	0.0102774	0.665712	3.77949	-3.77949
SEC24D	0.440754	0.213353	0.668155	6.70989	3.81319	0.000164422	0.0102774	0.675103	3.78404	3.78404
TASOR2	-0.359027	-0.544398	-0.173657	7.9026	-3.81042	0.000166193	0.0102774	0.665502	3.77939	-3.77939
ZNF248	-0.392493	-0.595027	-0.189959	5.90251	-3.81258	0.000164808	0.0102774	0.673002	3.78302	-3.78302
TRIM5	0.363672	0.17566	0.551684	5.9466	3.80548	0.000169399	0.0104293	0.648383	3.77109	3.77109
ELOA2	-0.105829	-0.160602	-0.0510552	3.4706	-3.80117	0.000172242	0.0105576	0.633473	3.76386	-3.76386
PPCS	0.33471	0.161349	0.508072	8.30492	3.7984	0.000174092	0.0106242	0.623902	3.75922	3.75922
SLC2A6	-0.324947	-0.493353	-0.156541	5.50405	-3.79612	0.000175634	0.0106715	0.616002	3.75539	-3.75539
ADORA2A	-0.204924	-0.311258	-0.0985909	4.32245	-3.79148	0.000178806	0.0106777	0.599972	3.74762	-3.74762
FPGS	-0.204339	-0.310316	-0.0983618	5.74013	-3.79336	0.000177515	0.0106777	0.606459	3.75076	-3.75076
SPECC1L-ADORA2A	-0.204924	-0.311258	-0.0985909	4.32245	-3.79148	0.000178806	0.0106777	0.599972	3.74762	-3.74762
ZNF609	-0.321448	-0.488113	-0.154783	6.87893	-3.79447	0.000176753	0.0106777	0.610312	3.75263	-3.75263
ZNF257	-0.170458	-0.258936	-0.0819796	3.60984	-3.79023	0.000179668	0.0106833	0.595665	3.74553	-3.74553
BORCS6	-0.191264	-0.290588	-0.0919406	4.8223	-3.78849	0.000180876	0.0107094	0.589664	3.74262	-3.74262
MS4A3	-0.166159	-0.252618	-0.0797003	3.54919	-3.78094	0.000186205	0.0109782	0.563661	3.73001	-3.73001
ABRAXAS2	-0.19854	-0.301992	-0.0950885	7.72272	-3.77569	0.000190005	0.010997	0.545575	3.72124	-3.72124
BRS3	-0.125588	-0.191146	-0.0600312	3.61543	-3.76889	0.000195025	0.010997	0.522234	3.70991	-3.70991
CXCL14	1.28166	0.612437	1.95088	8.68882	3.7678	0.000195847	0.010997	0.518469	3.70808	3.70808
DRG2	0.265606	0.126892	0.40432	6.41326	3.76707	0.000196393	0.010997	0.515978	3.70688	3.70688
EFNB2	0.551781	0.263948	0.839614	8.77981	3.77147	0.000193105	0.010997	0.53109	3.71421	3.71421
MXD4	-0.25633	-0.389944	-0.122716	7.07097	-3.77426	0.000191051	0.010997	0.540658	3.71885	-3.71885
PDX1	-0.147992	-0.225107	-0.0708777	3.8987	-3.77561	0.000190058	0.010997	0.545324	3.72111	-3.72111
PTGER4P3	-0.130322	-0.198297	-0.0623477	3.73817	-3.77187	0.000192811	0.010997	0.532452	3.71487	-3.71487
TAGLN2P1	0.540346	0.258243	0.822448	9.7883	3.76834	0.000195439	0.010997	0.520336	3.70899	3.70899
TRIM48	-0.267131	-0.4067	-0.127562	3.8432	-3.76549	0.000197588	0.010997	0.510547	3.70424	-3.70424
TRIM49D1	-0.267131	-0.4067	-0.127562	3.8432	-3.76549	0.000197588	0.010997	0.510547	3.70424	-3.70424
TRIM49D2	-0.267131	-0.4067	-0.127562	3.8432	-3.76549	0.000197588	0.010997	0.510547	3.70424	-3.70424
TRPM3	0.693826	0.33181	1.05584	5.10839	3.77057	0.000193772	0.010997	0.528001	3.71271	3.71271
UGP2	0.388252	0.186107	0.590397	9.9742	3.77864	0.000187859	0.010997	0.555746	3.72617	3.72617
CATSPERZ	-0.203825	-0.310357	-0.0972923	4.29766	-3.76409	0.000198647	0.0110118	0.505765	3.70192	-3.70192
GYPE	-0.104891	-0.159836	-0.0499453	3.57494	-3.7557	0.000205132	0.0110666	0.477016	3.68797	-3.68797
KIAA0040	0.486246	0.231741	0.740752	5.86685	3.75875	0.00020275	0.0110666	0.487467	3.69304	3.69304
SEC61A2	-0.379458	-0.578116	-0.180801	5.90517	-3.7579	0.000203416	0.0110666	0.484534	3.69162	-3.69162
SOD2	0.684232	0.325864	1.0426	9.78135	3.75629	0.000204668	0.0110666	0.479044	3.68895	3.68895
TEF	-0.139838	-0.213092	-0.0665845	3.81765	-3.75561	0.000205202	0.0110666	0.476713	3.68782	-3.68782
TIMM23	-0.312891	-0.476608	-0.149174	7.45936	-3.75997	0.000201808	0.0110666	0.491634	3.69506	-3.69506
TNNT1	-0.436101	-0.664244	-0.207959	4.36039	-3.76068	0.00020126	0.0110666	0.494068	3.69624	-3.69624
ADM	0.891261	0.423455	1.35907	9.49566	3.74821	0.000211088	0.0112065	0.451411	3.67554	3.67554
DCT	-0.611675	-0.932809	-0.29054	4.75123	-3.7473	0.000211823	0.0112065	0.448304	3.67403	-3.67403
LGALS1	0.459341	0.218437	0.700244	12.1906	3.75126	0.000208645	0.0112065	0.461823	3.68059	3.68059
NFIX	-0.511265	-0.779607	-0.242922	5.54603	-3.74836	0.000210969	0.0112065	0.451915	3.67578	-3.67578
TRIM22	0.638126	0.303226	0.973026	9.10052	3.74866	0.000210726	0.0112065	0.452945	3.67628	3.67628
PRPS1	-0.277289	-0.42291	-0.131667	9.6322	-3.7462	0.000212715	0.011211	0.444543	3.6722	-3.6722
SLC27A3	0.523198	0.248042	0.798353	6.40309	3.74087	0.000217084	0.0113981	0.426358	3.66337	3.66337
CASP9	-0.327769	-0.500289	-0.155249	7.67525	-3.73777	0.00021966	0.0114901	0.415807	3.65825	-3.65825
CTNNA1	0.251538	0.118984	0.384093	10.6342	3.73332	0.000223419	0.0116429	0.400633	3.65088	3.65088
CD163	0.950434	0.448988	1.45188	9.63684	3.72892	0.000227191	0.0117832	0.385664	3.64361	3.64361
FBXL15	-0.264367	-0.403873	-0.124861	5.62486	-3.72821	0.000227804	0.0117832	0.383255	3.64244	-3.64244
CELA2A	-0.125327	-0.19151	-0.0591438	3.76609	-3.72548	0.00023018	0.011862	0.373978	3.63793	-3.63793
SLC4A3	0.495557	0.233711	0.757402	5.99623	3.72334	0.000232055	0.0119144	0.366728	3.63441	3.63441
ABI3BP	-0.224917	-0.343919	-0.105915	3.79296	-3.71838	0.000236468	0.0119373	0.349887	3.62623	-3.62623
AP1G1	-0.258248	-0.394888	-0.121608	7.1856	-3.7183	0.000236543	0.0119373	0.349605	3.62609	-3.62609
ASB13	-0.338615	-0.517694	-0.159536	7.01945	-3.72003	0.000234991	0.0119373	0.35549	3.62895	-3.62895
EFNA3	-0.296684	-0.453792	-0.139575	5.90405	-3.71517	0.000239364	0.0119373	0.339007	3.62094	-3.62094
R3HCC1L	-0.153131	-0.234216	-0.0720458	3.80395	-3.71541	0.000239149	0.0119373	0.339813	3.62133	-3.62133
RBM3	0.397372	0.187021	0.607722	8.80699	3.71653	0.000238137	0.0119373	0.343604	3.62317	3.62317
RPP38	-0.321835	-0.492214	-0.151457	6.62931	-3.71624	0.000238398	0.0119373	0.342622	3.6227	-3.6227
VIPR2	-0.396855	-0.606717	-0.186994	5.38763	-3.72036	0.000234695	0.0119373	0.356615	3.6295	-3.6295
CSDC2	-0.419401	-0.641784	-0.197017	4.89259	-3.71032	0.000243803	0.0120294	0.322586	3.61296	-3.61296
P4HB	0.27684	0.130114	0.423565	10.0834	3.712	0.000242256	0.0120294	0.328275	3.61572	3.61572
TNFRSF1A	0.441956	0.207654	0.676257	8.26554	3.71098	0.000243191	0.0120294	0.324834	3.61405	3.61405
JADE3	-0.429566	-0.657585	-0.201547	6.12573	-3.70633	0.000247514	0.0121693	0.30909	3.6064	-3.6064
CENPT	-0.315527	-0.483114	-0.147941	5.45331	-3.70409	0.000249617	0.0122295	0.30153	3.60273	-3.60273
ZNF74	-0.257071	-0.393653	-0.12049	4.41563	-3.70294	0.000250711	0.01224	0.297622	3.60083	-3.60083
PYGO1	-0.201565	-0.308698	-0.0944311	4.44014	-3.70146	0.000252109	0.0122652	0.292655	3.59841	-3.59841
CNDP2	0.247989	0.116027	0.379951	9.91629	3.69716	0.000256239	0.0123795	0.27814	3.59136	3.59136
LRRC20	-0.24889	-0.381319	-0.11646	5.47473	-3.69748	0.000255933	0.0123795	0.279207	3.59187	-3.59187
EPB41	-0.101445	-0.155454	-0.0474372	3.54309	-3.69537	0.000257985	0.0124208	0.272075	3.58841	-3.58841
RBM48	0.356634	0.166643	0.546624	6.21974	3.69297	0.000260332	0.0124905	0.263985	3.58447	3.58447
EMX1	-0.14418	-0.221158	-0.067201	3.57041	-3.68484	0.000268428	0.0127908	0.236635	3.57117	-3.57117
HIST1H2AK	-0.131202	-0.201235	-0.0611683	3.62446	-3.68569	0.000267568	0.0127908	0.239499	3.57256	-3.57256
RRP1	-0.205497	-0.315369	-0.095625	5.50207	-3.67962	0.000273751	0.0129999	0.219103	3.56264	-3.56264
MDFI	-0.246896	-0.378952	-0.11484	3.99334	-3.67823	0.000275185	0.0130236	0.214436	3.56038	-3.56038
DPY19L1	0.47099	0.218832	0.723148	9.18468	3.67472	0.000278848	0.0131077	0.202632	3.55463	3.55463
MINDY3	-0.269578	-0.413884	-0.125273	6.5906	-3.67525	0.000278291	0.0131077	0.204419	3.5555	-3.5555
HSPA14	-0.394352	-0.605901	-0.182803	7.76084	-3.66739	0.000286624	0.0133954	0.178083	3.54269	-3.54269
SERPINA3	0.940356	0.43587	1.44484	11.6172	3.66714	0.000286892	0.0133954	0.177248	3.54228	3.54228
MXRA8	0.510067	0.236351	0.783783	7.1881	3.66616	0.000287947	0.0133996	0.173973	3.54069	3.54069
SLC12A7	0.374717	0.173584	0.575849	6.84068	3.66527	0.000288916	0.0133999	0.170975	3.53923	3.53923
PRL	-0.350639	-0.538909	-0.162369	4.00309	-3.66408	0.000290206	0.0134151	0.166997	3.53729	-3.53729
SRD5A2	-0.164509	-0.252889	-0.0761297	4.78091	-3.66204	0.000292431	0.0134731	0.160183	3.53398	-3.53398
TAGLN2	0.521182	0.240958	0.801405	9.79128	3.65906	0.000295715	0.0135794	0.150219	3.52913	3.52913
SGCG	-0.306977	-0.472241	-0.141714	3.63413	-3.65439	0.000300935	0.0137737	0.134607	3.52153	-3.52153
ETS1	-0.130597	-0.201077	-0.0601173	3.82794	-3.64547	0.000311128	0.0141935	0.104892	3.50706	-3.50706
ADAMTS13	-0.155653	-0.239784	-0.0715224	4.23031	-3.63988	0.000317685	0.0142215	0.0862914	3.498	-3.498
CUEDC2	-0.274236	-0.422469	-0.126003	9.20413	-3.6397	0.000317904	0.0142215	0.0856778	3.4977	-3.4977
LPAR6	0.426318	0.195959	0.656677	8.80162	3.64093	0.000316442	0.0142215	0.0897885	3.49971	3.49971
OPN1LW	-0.13032	-0.200828	-0.0598125	3.72551	-3.6363	0.000321961	0.0142215	0.0743681	3.4922	-3.4922
OPN1MW	-0.13032	-0.200828	-0.0598125	3.72551	-3.6363	0.000321961	0.0142215	0.0743681	3.4922	-3.4922
OPN1MW2	-0.13032	-0.200828	-0.0598125	3.72551	-3.6363	0.000321961	0.0142215	0.0743681	3.4922	-3.4922
OPN1MW3	-0.13032	-0.200828	-0.0598125	3.72551	-3.6363	0.000321961	0.0142215	0.0743681	3.4922	-3.4922
SDC2	0.626118	0.28753	0.964705	9.04897	3.63806	0.000319848	0.0142215	0.08024	3.49506	3.49506
SDF4	0.274838	0.126202	0.423474	8.8388	3.63779	0.000320169	0.0142215	0.079346	3.49462	3.49462
TMED2	0.201676	0.0927293	0.310622	10.4272	3.64188	0.000315333	0.0142215	0.0929194	3.50123	3.50123
CLEC16A	-0.207922	-0.320491	-0.0953521	4.69588	-3.63382	0.000324939	0.0142277	0.0661604	3.4882	-3.4882
EMP1	0.594922	0.272776	0.917067	10.7285	3.63323	0.000325662	0.0142277	0.0641782	3.48723	3.48723
HKDC1	-0.18575	-0.286344	-0.0851557	4.1159	-3.63279	0.000326192	0.0142277	0.0627277	3.48653	-3.48653
MPHOSPH6	-0.242534	-0.373805	-0.111263	9.03328	-3.63486	0.000323687	0.0142277	0.069602	3.48988	-3.48988
ACSM1	-0.14372	-0.221775	-0.0656652	3.7542	-3.62245	0.000338972	0.0144344	0.0284679	3.46984	-3.46984
APOL5	-0.129007	-0.199111	-0.0589025	3.80538	-3.62037	0.000341612	0.0144344	0.0215532	3.46647	-3.46647
EFEMP1	0.831883	0.379551	1.28421	10.9855	3.61818	0.000344397	0.0144344	0.0143167	3.46294	3.46294
FABP7	1.16016	0.530132	1.79019	11.1132	3.62278	0.000338562	0.0144344	0.029548	3.47036	3.47036
FRAT2	-0.254659	-0.392964	-0.116355	5.69523	-3.62249	0.000338923	0.0144344	0.0285962	3.4699	-3.4699
GRK3	-0.236621	-0.365183	-0.108059	5.13042	-3.62098	0.000340837	0.0144344	0.0235775	3.46745	-3.46745
IFITM3	0.479476	0.218762	0.740189	11.5932	3.61816	0.000344417	0.0144344	0.0142667	3.46292	3.46292
KLHDC4	-0.250414	-0.386263	-0.114566	5.45703	-3.62652	0.000333892	0.0144344	0.0419289	3.47639	-3.47639
MEIS1	0.594333	0.271392	0.917275	6.73451	3.62068	0.000341209	0.0144344	0.0226064	3.46698	3.46698
RPS10	-0.1606	-0.247843	-0.0733572	13.3639	-3.6216	0.000340046	0.0144344	0.0256481	3.46846	-3.46846
RPS10-NUDT3	-0.1606	-0.247843	-0.0733572	13.3639	-3.6216	0.000340046	0.0144344	0.0256481	3.46846	-3.46846
SPARC	0.462934	0.211517	0.71435	12.0467	3.62251	0.000338905	0.0144344	0.0286452	3.46992	3.46992
ZNF12	0.298533	0.136226	0.46084	8.24383	3.61859	0.000343877	0.0144344	0.0156632	3.4636	3.4636
CLIC1	0.479032	0.218181	0.739882	10.3183	3.61291	0.00035119	0.0145911	-0.00308873	3.45446	3.45446
EEF1D	-0.157338	-0.243	-0.0716754	11.7419	-3.6135	0.000350422	0.0145911	-0.00113701	3.45541	-3.45541
L1TD1	-0.209539	-0.323643	-0.0954344	3.79268	-3.61283	0.000351301	0.0145911	-0.00336974	3.45432	-3.45432
CYP2A13	-0.20332	-0.314149	-0.09249	4.31867	-3.60918	0.00035608	0.0147354	-0.0154089	3.44845	-3.44845
NEIL3	-0.268704	-0.415233	-0.122176	4.5612	-3.60776	0.000357955	0.0147354	-0.0200871	3.44617	-3.44617
SPP1	0.611372	0.278008	0.944735	12.7063	3.60805	0.000357573	0.0147354	-0.0191361	3.44664	3.44664
2002-03-01	0.431868	0.19617	0.667566	6.79122	3.60479	0.000361915	0.0148545	-0.0298881	3.44139	3.44139
AKAP12	0.694987	0.315527	1.07445	9.21368	3.60326	0.000363969	0.0148949	-0.0349315	3.43893	3.43893
ACTR1A	-0.309832	-0.479276	-0.140388	8.02401	-3.59737	0.000371981	0.0150896	-0.0543256	3.42948	-3.42948
CD14	0.740658	0.335727	1.14559	9.48929	3.59851	0.00037042	0.0150896	-0.0505797	3.43131	3.43131
TTN	-0.164667	-0.254712	-0.0746227	3.81756	-3.59778	0.000371415	0.0150896	-0.052969	3.43014	-3.43014
NNMT	1.11108	0.502879	1.71928	9.993	3.59405	0.000376567	0.0152313	-0.0652379	3.42416	3.42416
ELOVL2	0.953602	0.430867	1.47634	7.22848	3.58897	0.000383683	0.0154741	-0.0819073	3.41603	3.41603
HIST1H3B	-0.148351	-0.229721	-0.0669801	3.66954	-3.5868	0.000386773	0.0155536	-0.0890483	3.41254	-3.41254
RIPK2	-0.290096	-0.449303	-0.13089	6.93666	-3.58481	0.000389614	0.0156228	-0.0955659	3.40937	-3.40937
CTBP2P8	-0.243562	-0.377409	-0.109714	9.14659	-3.58	0.000396573	0.0158106	-0.111324	3.40168	-3.40168
SLC8B1	0.204279	0.0920304	0.316527	5.20881	3.58037	0.000396033	0.0158106	-0.110112	3.40227	3.40227
WNT7B	-0.154918	-0.240094	-0.0697421	3.67848	-3.57824	0.000399145	0.0158677	-0.117079	3.39887	-3.39887
NEDD9	0.464301	0.208507	0.720096	9.4135	3.57103	0.000409863	0.0162013	-0.140664	3.38736	3.38736
RABL6	-0.240941	-0.373661	-0.108221	4.93906	-3.57158	0.000409048	0.0162013	-0.138891	3.38823	-3.38823
ETV5	0.541841	0.243194	0.840488	8.32214	3.56942	0.000412292	0.0162511	-0.145922	3.38479	3.38479
TAPBPL	0.409295	0.183583	0.635007	6.2239	3.56752	0.000415174	0.0163185	-0.15212	3.38177	3.38177
FOXD1-AS1	-0.115378	-0.179031	-0.0517245	3.9261	-3.56604	0.000417434	0.0163611	-0.15695	3.37941	-3.37941
SMYD3	-0.422044	-0.655072	-0.189015	7.24253	-3.56314	0.000421898	0.0164896	-0.166413	3.37479	-3.37479
SSPN	0.536756	0.240282	0.833231	8.65646	3.56184	0.000423923	0.0165223	-0.170672	3.37271	3.37271
GCNT2	-0.171347	-0.266278	-0.0764161	4.12466	-3.55103	0.00044103	0.017141	-0.205862	3.35553	-3.35553
FOXH1	-0.107821	-0.167575	-0.0480672	3.7425	-3.54996	0.000442757	0.0171602	-0.209338	3.35384	-3.35384
HIST1H4B	-0.138833	-0.215794	-0.0618722	3.64959	-3.54901	0.000444293	0.0171719	-0.212417	3.35233	-3.35233
NYX	-0.122915	-0.191138	-0.0546923	3.87204	-3.54454	0.000451605	0.0174062	-0.226933	3.34524	-3.34524
COPG1	0.333713	0.148042	0.519384	8.11123	3.53601	0.00046587	0.0176644	-0.254579	3.33174	3.33174
EDC4	-0.220126	-0.342556	-0.0976958	5.8671	-3.53727	0.000463743	0.0176644	-0.250513	3.33372	-3.33372
MELTF	-0.121774	-0.189538	-0.0540108	3.88218	-3.53545	0.000466821	0.0176644	-0.256392	3.33085	-3.33085
OAS1	0.66346	0.294635	1.03229	6.83302	3.53899	0.000460841	0.0176644	-0.244932	3.33645	3.33645
PARG	-0.197625	-0.307603	-0.0876461	6.16908	-3.53523	0.000467192	0.0176644	-0.257098	3.33051	-3.33051
PCNP	0.225218	0.0999781	0.350458	10.3001	3.5379	0.000462677	0.0176644	-0.248467	3.33472	3.33472
TSHR	-0.449148	-0.698851	-0.199445	4.18043	-3.53876	0.000461229	0.0176644	-0.24568	3.33608	-3.33608
PLSCR4	0.506901	0.224415	0.789387	8.26409	3.53029	0.000475672	0.0179363	-0.273087	3.32269	3.32269
RXYLT1	0.326169	0.144333	0.508006	8.79373	3.52897	0.000477969	0.0179742	-0.277369	3.3206	3.3206
PMEL	-0.250842	-0.390861	-0.110823	4.04928	-3.5245	0.000485792	0.0181215	-0.291795	3.31355	-3.31355
SLC17A2	-0.145485	-0.22667	-0.0643002	3.86516	-3.52556	0.000483921	0.0181215	-0.288367	3.31522	-3.31522
SUPV3L1	-0.308272	-0.480344	-0.136199	6.64865	-3.52458	0.000485649	0.0181215	-0.291533	3.31368	-3.31368
CTBP2P4	-0.245465	-0.382709	-0.108221	9.28786	-3.5187	0.000496135	0.0183933	-0.310514	3.3044	-3.3044
NR0B1	-0.86813	-1.35359	-0.382674	4.79051	-3.51819	0.000497046	0.0183933	-0.312143	3.3036	-3.3036
STAG3	-0.227108	-0.354067	-0.100149	5.89028	-3.51929	0.000495073	0.0183933	-0.30861	3.30533	-3.30533
PAM	0.388818	0.171293	0.606344	10.9502	3.51658	0.000499953	0.0184518	-0.317323	3.30107	3.30107
DGKE	-0.118481	-0.184837	-0.0521242	3.75361	-3.51277	0.000506914	0.01861	-0.329607	3.29507	-3.29507
ULBP1	-0.108923	-0.169925	-0.0479204	3.6537	-3.51283	0.000506804	0.01861	-0.329413	3.29516	-3.29516
CLN5	0.305529	0.134289	0.476768	8.79729	3.51021	0.000511638	0.018734	-0.337845	3.29104	3.29104
EFNA2	-0.142326	-0.222129	-0.0625231	3.54524	-3.50873	0.000514378	0.0187849	-0.342589	3.28872	-3.28872
NOC3L	-0.260909	-0.407562	-0.114257	7.83222	-3.50013	0.000530627	0.0193276	-0.370206	3.27521	-3.27521
ANTXR1	-0.243046	-0.379824	-0.106267	4.12983	-3.49586	0.000538879	0.0194924	-0.383906	3.26851	-3.26851
HDGF	-0.231664	-0.362047	-0.101282	10.1562	-3.49562	0.000539354	0.0194924	-0.384688	3.26813	-3.26813
SERPINB6	0.320121	0.139994	0.500248	8.94616	3.49639	0.000537852	0.0194924	-0.382212	3.26934	3.26934
PLEKHA4	0.308623	0.134583	0.482663	5.1297	3.4887	0.000552965	0.0199325	-0.40681	3.2573	3.2573
PCSK5	0.610914	0.266319	0.955508	7.23541	3.48784	0.000554695	0.0199432	-0.409583	3.25595	3.25595
APOBEC3G	0.541074	0.235777	0.846371	7.8654	3.48674	0.000556896	0.0199481	-0.413097	3.25423	3.25423
TMED7	0.183465	0.0799346	0.286996	8.73042	3.48634	0.000557698	0.0199481	-0.414375	3.2536	3.2536
BASP1	-0.686327	-1.07377	-0.298882	9.37937	-3.48502	0.000560344	0.0199913	-0.418574	3.25155	-3.25155
HS2ST1	0.303568	0.132052	0.475083	8.19628	3.48207	0.000566332	0.0201533	-0.428006	3.24693	3.24693
PHKG2	-0.191466	-0.299762	-0.0831687	6.252	-3.47824	0.000574184	0.0203806	-0.440224	3.24095	-3.24095
ADAM9	0.400315	0.173526	0.627104	9.80519	3.47268	0.000585778	0.0207392	-0.457959	3.23227	3.23227
UFM1	0.229314	0.0992971	0.359332	9.41636	3.46989	0.000591674	0.0208948	-0.466841	3.22792	3.22792
SEMA4G	-0.216235	-0.338869	-0.0936019	4.6135	-3.46899	0.000593584	0.0209092	-0.469701	3.22652	-3.22652
PDCD11	-0.262042	-0.41071	-0.113374	5.70114	-3.46767	0.000596384	0.0209548	-0.473875	3.22447	-3.22447
CD302	0.513299	0.221759	0.804838	8.23468	3.46384	0.000604646	0.0211383	-0.486077	3.2185	3.2185
NDFIP1	0.317492	0.13717	0.497815	10.4625	3.46392	0.000604466	0.0211383	-0.485812	3.21863	3.21863
GAL3ST4	0.316554	0.136703	0.496405	7.7308	3.46273	0.000607042	0.0211689	-0.489583	3.21678	3.21678
ATP5F1C	-0.25647	-0.402283	-0.110657	11.1656	-3.46039	0.000612152	0.0212163	-0.497016	3.21314	-3.21314
DNMT3B	-0.339563	-0.532677	-0.146449	4.96425	-3.45932	0.000614501	0.0212163	-0.500412	3.21148	-3.21148
IQCE	0.393973	0.169931	0.618014	5.70777	3.45957	0.000613951	0.0212163	-0.499619	3.21187	3.21187
MNX1	-0.309181	-0.484922	-0.133441	4.95515	-3.46119	0.000610401	0.0212163	-0.494475	3.21439	-3.21439
FOXN2	-0.200836	-0.315136	-0.086536	4.39454	-3.45685	0.000619959	0.0213518	-0.508252	3.20764	-3.20764
SCN10A	-0.152151	-0.238808	-0.0654931	3.69631	-3.45424	0.000625776	0.0214989	-0.516532	3.20358	-3.20358
RELN	-0.569078	-0.893281	-0.244876	4.86682	-3.45335	0.000627762	0.0215107	-0.519341	3.20221	-3.20221
SLC12A6	-0.15175	-0.238217	-0.0652822	3.90814	-3.45271	0.000629211	0.0215107	-0.521384	3.2012	-3.2012
PAX9	-0.133702	-0.20992	-0.0574846	3.72165	-3.45118	0.000632645	0.0215223	-0.526209	3.19884	-3.19884
ZNF280A	-0.118292	-0.185715	-0.0508689	3.68961	-3.45168	0.00063151	0.0215223	-0.524617	3.19962	-3.19962
B3GALNT1	0.399503	0.171366	0.627639	6.55073	3.44516	0.000646388	0.0218587	-0.545256	3.18951	3.18951
NECAB3	-0.264016	-0.414799	-0.113233	6.02618	-3.44479	0.000647248	0.0218587	-0.546433	3.18893	-3.18893
YIPF1	0.254545	0.109189	0.399902	7.10442	3.44521	0.000646271	0.0218587	-0.545096	3.18959	3.18959
CDH20	-0.238447	-0.374697	-0.102196	3.98711	-3.443	0.000651387	0.0218923	-0.552083	3.18616	-3.18616
ITPRID2	0.37259	0.159692	0.585489	8.5659	3.44305	0.000651265	0.0218923	-0.551917	3.18624	3.18624
CD81	0.284284	0.121644	0.446923	10.9738	3.43884	0.000661126	0.0221128	-0.565233	3.17972	3.17972
TIAL1	-0.222809	-0.350264	-0.0953534	8.68078	-3.43921	0.000660235	0.0221128	-0.564037	3.1803	-3.1803
RCC1	-0.352477	-0.55432	-0.150635	5.6335	-3.4356	0.000668784	0.0223153	-0.575437	3.17471	-3.17471
NPM3	-0.397049	-0.624586	-0.169512	4.98025	-3.43302	0.000674949	0.0224135	-0.583565	3.17073	-3.17073
PRKAR1A	0.2455	0.104814	0.386185	10.7411	3.4331	0.00067477	0.0224135	-0.58333	3.17084	3.17084
FCER2	-0.161659	-0.25434	-0.0689774	3.68345	-3.43156	0.000678459	0.022423	-0.588159	3.16848	-3.16848
HPS6	-0.185986	-0.292595	-0.0793771	5.9492	-3.43219	0.000676944	0.022423	-0.58618	3.16945	-3.16945
GZMM	-0.157003	-0.247045	-0.0669612	3.9329	-3.43043	0.000681196	0.0224601	-0.591726	3.16673	-3.16673
GSE1	-0.488425	-0.768669	-0.208181	7.23326	-3.42884	0.000685069	0.0224812	-0.596747	3.16427	-3.16427
SLC25A10	-0.170032	-0.267582	-0.0724818	4.21088	-3.42916	0.000684287	0.0224812	-0.595735	3.16476	-3.16476
S100A8	1.02841	0.438166	1.61865	8.88584	3.42784	0.000687502	0.022508	-0.599887	3.16273	3.16273
LDHC	-0.173586	-0.273345	-0.0738266	3.90945	-3.42331	0.000698644	0.0227748	-0.614125	3.15574	-3.15574
SAA3P	-0.140536	-0.221305	-0.0597679	3.64034	-3.4232	0.000698926	0.0227748	-0.614482	3.15557	-3.15557
CD63	0.255702	0.108643	0.402762	12.5435	3.42078	0.000704932	0.0229169	-0.622058	3.15185	3.15185
CLGN	-0.619339	-0.975753	-0.262925	4.79694	-3.41868	0.000710212	0.0229912	-0.628667	3.14861	-3.14861
SNX10	0.760564	0.322863	1.19826	8.77336	3.41856	0.000710523	0.0229912	-0.629054	3.14842	3.14842
IAPP	-0.231434	-0.364688	-0.0981794	3.93915	-3.41689	0.000714744	0.0230741	-0.634298	3.14585	-3.14585
CHI3L2	1.02067	0.432789	1.60856	8.07735	3.4157	0.000717761	0.0231179	-0.638027	3.14402	3.14402
MINDY2	0.361661	0.15319	0.570133	6.70048	3.41304	0.000724557	0.0232829	-0.646369	3.13993	3.13993
PADI1	-0.181623	-0.286387	-0.0768597	4.4798	-3.41072	0.000730513	0.0234202	-0.653616	3.13637	-3.13637
C6orf62	0.239693	0.101299	0.378086	10.3386	3.4074	0.00073914	0.0235519	-0.664007	3.13127	3.13127
MLLT10P1	-0.144495	-0.227928	-0.0610612	3.63327	-3.40719	0.000739699	0.0235519	-0.664677	3.13095	-3.13095
RARRES2	0.821155	0.34702	1.29529	7.7651	3.40728	0.000739454	0.0235519	-0.664383	3.13109	3.13109
PKD2	0.322849	0.136338	0.509359	7.6128	3.4055	0.000744132	0.0236389	-0.669964	3.12835	3.12835
CXCR1	-0.112075	-0.176858	-0.0472927	4.06743	-3.40359	0.000749174	0.0237449	-0.67594	3.12542	-3.12542
BLK	-0.135864	-0.214418	-0.0573097	3.85789	-3.40267	0.000751611	0.023768	-0.678814	3.12401	-3.12401
BCAP29	0.322224	0.13573	0.508718	7.87717	3.39921	0.000760828	0.0239506	-0.6896	3.11871	3.11871
TRIM46	-0.116952	-0.184632	-0.0492722	3.65407	-3.39964	0.000759684	0.0239506	-0.688268	3.11937	-3.11937
MORF4L1	0.217959	0.091754	0.344163	11.7376	3.39769	0.000764935	0.0239706	-0.694362	3.11638	3.11638
MYO3A	-0.136943	-0.216222	-0.0576629	3.60972	-3.3983	0.000763297	0.0239706	-0.692466	3.11731	-3.11731
VPS26A	-0.25542	-0.403344	-0.107497	9.69876	-3.39706	0.000766633	0.0239706	-0.696324	3.11541	-3.11541
PPP1R2C	-0.134424	-0.212324	-0.0565234	3.94544	-3.39486	0.000772609	0.0241033	-0.703193	3.11204	-3.11204
CHRNA4	-0.131268	-0.207381	-0.0551555	4.0062	-3.39303	0.000777609	0.0241763	-0.7089	3.10924	-3.10924
RIOX2	0.333683	0.140152	0.527214	8.22922	3.3921	0.000780161	0.0241763	-0.711798	3.10782	3.10782
SPRY2	0.583735	0.245216	0.922254	9.40832	3.39248	0.000779102	0.0241763	-0.710596	3.10841	3.10841
PDLIM4	0.869568	0.36505	1.37409	7.96796	3.39087	0.000783529	0.0242267	-0.715608	3.10595	3.10595
HIST1H2AL	-0.129781	-0.205116	-0.0544464	3.7288	-3.38922	0.000788094	0.0243138	-0.720747	3.10342	-3.10342
BRWD1	-0.213423	-0.337518	-0.0893278	4.52825	-3.38354	0.000804014	0.0247501	-0.738434	3.09474	-3.09474
FAM3C	0.332034	0.138933	0.525135	9.97905	3.38286	0.000805949	0.0247549	-0.740559	3.09369	3.09369
DGCR11	-0.170841	-0.270342	-0.0713408	4.7278	-3.37794	0.000819976	0.0251303	-0.755816	3.0862	-3.0862
MIP	-0.113831	-0.180284	-0.0473777	3.87162	-3.36999	0.000843171	0.0257843	-0.780474	3.07408	-3.07408
ANXA2	0.532746	0.221607	0.843884	11.7593	3.36861	0.000847249	0.0258127	-0.784738	3.07199	3.07199
CARD14	-0.111117	-0.176049	-0.0461841	3.73895	-3.36668	0.000853018	0.0258127	-0.790735	3.06904	-3.06904
DACH1	-0.399751	-0.633394	-0.166108	4.55883	-3.36606	0.000854848	0.0258127	-0.792629	3.06811	-3.06811
RFTN1	0.528112	0.219647	0.836576	9.32073	3.36826	0.000848303	0.0258127	-0.785837	3.07145	3.07145
SPCS3	0.219462	0.0911784	0.347745	9.22476	3.36568	0.000855982	0.0258127	-0.793801	3.06753	3.06753
TEP1	0.239094	0.0993195	0.378868	4.39225	3.36532	0.000857083	0.0258127	-0.794937	3.06698	3.06698
TFAM	-0.328493	-0.520448	-0.136538	7.04928	-3.36675	0.000852795	0.0258127	-0.790505	3.06915	-3.06915
NDUFAF5	-0.102804	-0.162933	-0.042675	4.05125	-3.36365	0.000862106	0.0258607	-0.8001	3.06444	-3.06444
PDZD2	0.738422	0.306514	1.17033	7.97051	3.36355	0.000862395	0.0258607	-0.800397	3.06429	3.06429
HLA-DPA2	-0.112886	-0.178942	-0.0468295	4.24254	-3.36209	0.000866806	0.0259371	-0.804904	3.06208	-3.06208
HSBP1	-0.265198	-0.420506	-0.109889	10.7684	-3.35938	0.000875077	0.0260724	-0.813295	3.05795	-3.05795
ZNF208	-0.0973958	-0.154431	-0.0403601	3.55988	-3.35953	0.000874613	0.0260724	-0.812827	3.05818	-3.05818
CTNNB1	0.185658	0.076851	0.294464	10.398	3.35693	0.000882592	0.0261291	-0.82085	3.05424	3.05424
HIST1H2AG	-0.258291	-0.409665	-0.106916	3.83561	-3.35692	0.000882612	0.0261291	-0.82087	3.05423	-3.05423
PPP1R15A	0.324047	0.134199	0.513894	6.11412	3.35805	0.000879145	0.0261291	-0.817392	3.05594	3.05594
CNNM2	-0.191277	-0.303421	-0.0791334	4.78649	-3.35562	0.000886639	0.0261926	-0.824891	3.05225	-3.05225
ARHGEF16	-0.200184	-0.317578	-0.08279	4.30083	-3.35482	0.000889134	0.0262106	-0.827374	3.05103	-3.05103
IFIH1	0.476552	0.196948	0.756157	6.55161	3.35313	0.000894365	0.0263091	-0.832555	3.04848	3.04848
CHRM3	0.618613	0.255474	0.981753	5.79474	3.35143	0.000899686	0.0264098	-0.837794	3.04591	3.04591
GLT8D1	0.204576	0.0843643	0.324788	9.67552	3.34805	0.000910357	0.0266667	-0.848208	3.04079	3.04079
PYGL	0.512176	0.211156	0.813197	8.04445	3.34741	0.000912408	0.0266707	-0.850195	3.03981	3.03981
BUB3	-0.27937	-0.443625	-0.115115	9.38432	-3.34615	0.000916423	0.026676	-0.854073	3.0379	-3.0379
MED18	-0.265139	-0.421023	-0.109254	6.05699	-3.34623	0.00091617	0.026676	-0.85383	3.03802	-3.03802
LZTFL1	0.311574	0.128313	0.494834	7.10526	3.34485	0.000920575	0.0266852	-0.858065	3.03594	3.03594
VEGFC	-0.386291	-0.613492	-0.15909	4.41575	-3.34495	0.000920261	0.0266852	-0.857763	3.03609	-3.03609
CASP1	0.52402	0.215642	0.832399	7.47531	3.3431	0.000926217	0.0267929	-0.86346	3.03329	3.03329
GBX2	-0.197504	-0.313758	-0.081251	3.8385	-3.34238	0.000928528	0.026804	-0.86566	3.0322	-3.0322
GTPBP10	-0.0958966	-0.152361	-0.0394317	3.55576	-3.34126	0.000932167	0.0268534	-0.869114	3.03051	-3.03051
BCCIP	-0.251214	-0.399196	-0.103232	5.69408	-3.3398	0.000936901	0.0268784	-0.873586	3.02831	-3.02831
CYP7B1	-0.233228	-0.370606	-0.0958493	4.13255	-3.34	0.000936246	0.0268784	-0.872969	3.02861	-3.02861
IRS2	0.411399	0.168851	0.653947	10.6244	3.33696	0.000946212	0.0270897	-0.882317	3.02401	3.02401
IGFBP3	0.78632	0.322484	1.25016	10.4037	3.33519	0.00095205	0.0272009	-0.887746	3.02134	3.02134
CADM1	0.409745	0.167913	0.651577	9.73387	3.33338	0.000958029	0.0273156	-0.893272	3.01862	3.01862
CDK17	0.259901	0.106419	0.413383	8.69339	3.33146	0.000964456	0.0273308	-0.899174	3.01572	3.01572
HOPX	0.813634	0.333212	1.29406	11.3099	3.33189	0.000963015	0.0273308	-0.897854	3.01637	3.01637
LINC02637	-0.138118	-0.219676	-0.05656	3.75334	-3.33172	0.000963582	0.0273308	-0.898373	3.01611	-3.01611
POLL	-0.156977	-0.249722	-0.0642331	4.95764	-3.32993	0.000969605	0.0274209	-0.903873	3.01341	-3.01341
GPATCH2L	-0.167605	-0.2667	-0.0685108	4.34022	-3.32754	0.00097766	0.0275368	-0.911174	3.00981	-3.00981
SEMA3D	-0.187372	-0.298151	-0.0765936	3.69694	-3.32762	0.000977395	0.0275368	-0.910934	3.00993	-3.00993
THNSL2	0.44036	0.179856	0.700864	4.33513	3.32566	0.000984051	0.0276608	-0.916923	3.00698	3.00698
CYP21A1P	-0.149831	-0.238596	-0.0610651	4.03131	-3.32079	0.00100081	0.0280187	-0.931825	2.99965	-2.99965
CYP21A2	-0.149831	-0.238596	-0.0610651	4.03131	-3.32079	0.00100081	0.0280187	-0.931825	2.99965	-2.99965
HIST1H2BN	-0.120289	-0.191615	-0.0489619	3.87368	-3.31785	0.00101102	0.0282478	-0.940781	2.99524	-2.99524
C11orf21	-0.128847	-0.205307	-0.0523869	4.2185	-3.31531	0.00101995	0.0283831	-0.948533	2.99142	-2.99142
TCTA	0.367915	0.149592	0.586238	7.90772	3.31538	0.00101973	0.0283831	-0.948345	2.99152	2.99152
CD24	-1.02249	-1.62957	-0.415417	8.84301	-3.31362	0.00102594	0.028493	-0.953702	2.98888	-2.98888
APLP2	0.318589	0.129384	0.507795	10.665	3.3127	0.00102921	0.0285268	-0.956506	2.9875	2.9875
HIST2H4A	-0.174089	-0.27761	-0.0705671	3.80564	-3.30845	0.00104443	0.0286861	-0.969451	2.98112	-2.98112
HIST2H4B	-0.174089	-0.27761	-0.0705671	3.80564	-3.30845	0.00104443	0.0286861	-0.969451	2.98112	-2.98112
RPH3A	0.718782	0.291456	1.14611	5.34284	3.3092	0.00104172	0.0286861	-0.967163	2.98225	2.98225
TXK	-0.0967513	-0.154265	-0.039237	3.64466	-3.30953	0.00104054	0.0286861	-0.966164	2.98274	-2.98274
UBE3B	-0.26564	-0.423613	-0.107666	7.0783	-3.30822	0.00104527	0.0286861	-0.97016	2.98077	-2.98077
CLCN5	-0.210068	-0.335079	-0.0850565	4.24162	-3.30594	0.00105351	0.0288312	-0.977087	2.97736	-2.97736
SUV39H2	-0.130136	-0.207588	-0.0526846	3.55684	-3.30562	0.0010547	0.0288312	-0.978079	2.97687	-2.97687
CCDC198	-0.14908	-0.237835	-0.0603237	3.57933	-3.3045	0.00105876	0.0288853	-0.981464	2.9752	-2.9752
LAMA2	0.575785	0.23291	0.91866	6.37885	3.30377	0.00106144	0.0289019	-0.983696	2.97411	2.97411
INHBB	0.413902	0.167355	0.660448	6.75508	3.30281	0.00106496	0.028941	-0.986611	2.97267	2.97267
CA6	-0.117198	-0.187091	-0.0473049	3.89117	-3.29891	0.00107937	0.0292754	-0.99846	2.96683	-2.96683
KCTD12	0.520777	0.210127	0.831427	10.0677	3.29811	0.00108235	0.0292991	-1.00089	2.96563	2.96563
AMN	-0.135584	-0.216567	-0.0546013	4.11094	-3.29383	0.00109841	0.0295251	-1.01388	2.95924	-2.95924
CDR1	-0.146911	-0.23462	-0.059202	3.67328	-3.2953	0.00109285	0.0295251	-1.00941	2.96144	-2.96144
FBXO3	0.35277	0.142016	0.563525	7.64393	3.29306	0.0011013	0.0295251	-1.01619	2.95809	2.95809
GRB10	0.556699	0.224173	0.889225	8.52696	3.29367	0.001099	0.0295251	-1.01435	2.959	2.959
IQCC	-0.121187	-0.193577	-0.0487959	4.32907	-3.29349	0.00109968	0.0295251	-1.0149	2.95873	-2.95873
PBX2	-0.228489	-0.365079	-0.0918986	6.37637	-3.29102	0.00110909	0.0296766	-1.0224	2.95503	-2.95503
AFF4	-0.17516	-0.279909	-0.0704114	4.10494	-3.28981	0.00111369	0.0297425	-1.02605	2.95324	-2.95324
ADK	-0.351668	-0.562041	-0.141296	8.64391	-3.28874	0.00111781	0.0297663	-1.0293	2.95163	-2.95163
CD24P4	-0.884411	-1.41352	-0.355301	6.84882	-3.28846	0.00111886	0.0297663	-1.03013	2.95122	-2.95122
PLA2G2A	1.06698	0.428294	1.70567	6.66977	3.28664	0.00112587	0.0298958	-1.03564	2.94851	2.94851
HTR6	-0.127171	-0.203343	-0.0509997	4.08667	-3.28459	0.00113385	0.0300503	-1.04186	2.94544	-2.94544
GPI	0.372694	0.149272	0.596117	9.78657	3.28179	0.0011448	0.0300592	-1.05032	2.94127	2.94127
HLA-C	0.347965	0.139329	0.556602	11.3337	3.28119	0.00114715	0.0300592	-1.05213	2.94038	2.94038
LRRC1	-0.390139	-0.623986	-0.156292	5.422	-3.28225	0.00114296	0.0300592	-1.04891	2.94197	-2.94197
MT1E	0.475591	0.190661	0.760521	10.8043	3.28382	0.00113683	0.0300592	-1.04417	2.94431	2.94431
SLC30A5	0.265137	0.106182	0.424092	7.9752	3.28156	0.00114569	0.0300592	-1.051	2.94094	2.94094
SMPDL3A	0.389846	0.156207	0.623484	7.6507	3.28272	0.00114114	0.0300592	-1.04751	2.94266	2.94266
LIMD2	-0.160895	-0.257459	-0.0643317	4.59233	-3.27804	0.00115958	0.0303279	-1.06163	2.9357	-2.9357
RPN1	0.289975	0.115868	0.464083	9.62337	3.27664	0.00116519	0.0304173	-1.06587	2.9336	2.9336
SPRY4	0.683578	0.272529	1.09463	7.85116	3.27174	0.00118487	0.0308732	-1.08062	2.92633	2.92633
FUT7	-0.16513	-0.264582	-0.065678	4.17324	-3.26661	0.00120585	0.031361	-1.09607	2.91871	-2.91871
TMEM176A	0.64803	0.257473	1.03859	8.27258	3.26434	0.00121525	0.0315466	-1.10291	2.91533	2.91533
CRYBA1	-0.149586	-0.239757	-0.0594155	3.71587	-3.26371	0.00121788	0.031556	-1.10482	2.9144	-2.9144
CD24P2	-0.98686	-1.58228	-0.391435	6.65157	-3.26072	0.00123035	0.0316612	-1.11378	2.90997	-2.90997
GID4	-0.180992	-0.290148	-0.0718363	4.17265	-3.2621	0.00122457	0.0316612	-1.10964	2.91201	-2.91201
PRKG2	-0.146561	-0.234991	-0.058131	3.69169	-3.26065	0.00123065	0.0316612	-1.114	2.90986	-2.90986
UPF2	-0.318037	-0.509935	-0.126139	6.7389	-3.26056	0.00123104	0.0316612	-1.11428	2.90973	-2.90973
HIST1H2AD	-0.204067	-0.327273	-0.0808608	4.00588	-3.25855	0.00123949	0.0318196	-1.12029	2.90676	-2.90676
ASCC1	-0.326476	-0.523711	-0.129241	7.3409	-3.25651	0.00124816	0.031895	-1.12643	2.90373	-2.90373
CLIP4	-0.282477	-0.453145	-0.111809	4.75258	-3.25624	0.0012493	0.031895	-1.12724	2.90333	-2.90333
OSMR	0.486674	0.19271	0.780637	5.69407	3.25709	0.00124569	0.031895	-1.12469	2.90459	2.90459
RGS1	0.631164	0.249704	1.01262	10.1691	3.2552	0.00125374	0.0319496	-1.13035	2.90179	2.90179
GATA1	-0.136179	-0.218503	-0.0538545	4.01979	-3.25436	0.00125731	0.0319822	-1.13286	2.90056	-2.90056
HEBP1	0.418693	0.165492	0.671895	9.0243	3.25323	0.00126219	0.0320477	-1.13627	2.89887	2.89887
SNAP29	-0.224239	-0.359928	-0.0885507	7.49641	-3.25127	0.00127061	0.0322028	-1.14212	2.89599	-2.89599
PDGFD	0.725244	0.286232	1.16426	6.65155	3.25007	0.00127583	0.0322763	-1.14573	2.89421	2.89421
COL9A3	0.827092	0.326279	1.3279	6.04609	3.2491	0.00128005	0.0323019	-1.14863	2.89277	2.89277
PRORY	-0.112532	-0.180678	-0.0443856	3.91775	-3.24877	0.00128149	0.0323019	-1.14962	2.89229	-2.89229
KCTD20	-0.259625	-0.416876	-0.102375	4.93759	-3.24818	0.00128408	0.0323087	-1.1514	2.89141	-2.89141
LYZ	0.796673	0.313844	1.2795	8.33556	3.24617	0.00129287	0.032471	-1.15739	2.88845	2.88845
CCDC91	0.282613	0.111248	0.453978	7.67413	3.24455	0.0013	0.0325914	-1.16224	2.88605	2.88605
ALCAM	-0.491473	-0.789707	-0.193239	10.1911	-3.2421	0.00131086	0.0326125	-1.16955	2.88244	-2.88244
CYP51A1	0.306272	0.120376	0.492167	9.00753	3.24133	0.0013143	0.0326125	-1.17186	2.8813	2.8813
FRMD4B	0.421819	0.165801	0.677837	5.91184	3.24146	0.00131373	0.0326125	-1.17147	2.8815	2.8815
HSD3BP1	-0.086607	-0.139179	-0.0340353	3.46786	-3.24105	0.00131557	0.0326125	-1.1727	2.88089	-2.88089
LINC00474	-0.0907252	-0.145819	-0.0356316	3.72687	-3.23975	0.00132138	0.0326125	-1.17658	2.87897	-2.87897
PKDREJ	-0.184302	-0.296154	-0.0724487	4.42818	-3.24165	0.00131286	0.0326125	-1.1709	2.88178	-2.88178
PPY2P	-0.0898671	-0.144442	-0.0352925	3.50407	-3.23963	0.00132194	0.0326125	-1.17695	2.87879	-2.87879
TMEM158	0.703574	0.276367	1.13078	9.61631	3.24008	0.0013199	0.0326125	-1.1756	2.87946	2.87946
ZMYND11	-0.24092	-0.387201	-0.094638	10.4155	-3.24017	0.00131952	0.0326125	-1.17534	2.87959	-2.87959
DNAJC9	-0.309012	-0.496703	-0.12132	8.80928	-3.23903	0.0013246	0.0326202	-1.17872	2.87792	-2.87792
PSG9	-0.15602	-0.250826	-0.0612144	3.99038	-3.23766	0.00133081	0.0327154	-1.18284	2.87588	-2.87588
ERLIN2	0.27664	0.108401	0.444879	8.02578	3.23499	0.00134289	0.0329541	-1.19078	2.87196	2.87196
ATP2C2	-0.206298	-0.331868	-0.0807283	4.24754	-3.23218	0.00135577	0.0332016	-1.19917	2.86781	-2.86781
PLTP	0.565779	0.221354	0.910204	8.9902	3.23174	0.00135775	0.0332016	-1.20046	2.86718	2.86718
TNNI1	-0.111839	-0.179961	-0.0437168	3.62898	-3.2299	0.00136625	0.033351	-1.20594	2.86447	-2.86447
HIST1H1E	-0.349125	-0.561979	-0.136271	4.53999	-3.22688	0.00138028	0.0334598	-1.21492	2.86003	-2.86003
KDM4A	-0.246895	-0.39747	-0.0963197	6.57256	-3.22585	0.00138514	0.0334598	-1.21801	2.85851	-2.85851
RNF186	-0.120178	-0.193448	-0.0469091	3.75938	-3.22693	0.00138007	0.0334598	-1.21479	2.8601	-2.8601
SMS	0.369988	0.144444	0.595532	8.27882	3.22731	0.0013783	0.0334598	-1.21366	2.86066	2.86066
SUPT7L	-0.177874	-0.286339	-0.0694094	7.97537	-3.22633	0.00138285	0.0334598	-1.21656	2.85922	-2.85922
TAS2R9	-0.111211	-0.179019	-0.0434039	3.67269	-3.22669	0.0013812	0.0334598	-1.21551	2.85974	-2.85974
SPATS2L	0.308477	0.120245	0.496709	10.0693	3.22413	0.00139318	0.0335956	-1.2231	2.85599	2.85599
CD99	0.426848	0.166233	0.687464	12.1497	3.22224	0.00140211	0.0336942	-1.22871	2.85322	2.85322
PRRG2	-0.147254	-0.237159	-0.0573481	4.20059	-3.22229	0.0014019	0.0336942	-1.22858	2.85328	-2.85328
PKLR	-0.0977954	-0.157608	-0.0379831	3.79812	-3.21672	0.00142854	0.0342112	-1.24512	2.84511	-2.84511
TET3	-0.161946	-0.260993	-0.0628989	4.0016	-3.21672	0.00142853	0.0342112	-1.24512	2.84511	-2.84511
POU2F3	-0.122986	-0.198293	-0.0476795	3.74039	-3.21297	0.00144668	0.0345862	-1.25621	2.83963	-2.83963
ZNF239	-0.365405	-0.589199	-0.14161	5.91126	-3.21226	0.0014502	0.0346107	-1.25834	2.83857	-2.83857
MLLT10	-0.267978	-0.432161	-0.103795	5.02343	-3.21112	0.00145578	0.0346844	-1.26172	2.8369	-2.8369
GRIN2D	-0.0905919	-0.14616	-0.0350236	3.42966	-3.20736	0.00147433	0.0350508	-1.27284	2.83141	-2.83141
UPK2	-0.114245	-0.18433	-0.0441598	3.70703	-3.20698	0.0014762	0.0350508	-1.27395	2.83086	-2.83086
CXCL8	1.05049	0.405381	1.69559	8.79481	3.20365	0.00149286	0.0353862	-1.28381	2.82598	2.82598
TWF1	0.256146	0.0988188	0.413474	9.57997	3.20308	0.00149569	0.0353928	-1.28547	2.82516	2.82516
PDCD1LG2	0.111012	0.0427824	0.179242	3.67097	3.20097	0.00150635	0.0355847	-1.29171	2.82207	2.82207
BCAP31	0.22867	0.0879425	0.369398	9.73136	3.1968	0.00152764	0.035692	-1.30403	2.81598	2.81598
CXXC4	-0.467613	-0.755157	-0.180069	5.59247	-3.19939	0.00151438	0.035692	-1.29638	2.81976	-2.81976
FAM120C	-0.126712	-0.204676	-0.0487474	3.88071	-3.19747	0.0015242	0.035692	-1.30205	2.81696	-2.81696
FOXI1	-0.0875117	-0.141365	-0.033658	3.53957	-3.19695	0.00152686	0.035692	-1.30358	2.8162	-2.8162
HRH1	0.556795	0.214067	0.899524	7.70023	3.19617	0.00153084	0.035692	-1.30586	2.81507	2.81507
JADE1	-0.335333	-0.54173	-0.128937	7.65756	-3.19639	0.00152975	0.035692	-1.30524	2.81538	-2.81538
NFE2L2	0.279266	0.107361	0.45117	10.3638	3.19606	0.00153142	0.035692	-1.3062	2.81491	2.81491
TPP2	-0.26281	-0.424457	-0.101163	8.09662	-3.19859	0.00151847	0.035692	-1.29874	2.81859	-2.81859
ANP32B	-0.216987	-0.350671	-0.0833035	11.0911	-3.19331	0.00154564	0.0357795	-1.31431	2.81089	-2.81089
ASIP	-0.0945514	-0.1528	-0.0363027	3.63852	-3.1935	0.00154466	0.0357795	-1.31375	2.81117	-2.81117
CEBPB	0.381218	0.14632	0.616117	10.3037	3.19285	0.00154803	0.0357795	-1.31567	2.81022	2.81022
TRIM34	0.321092	0.123315	0.518868	5.77064	3.19403	0.00154192	0.0357795	-1.31219	2.81194	2.81194
TRIM6-TRIM34	0.321092	0.123315	0.518868	5.77064	3.19403	0.00154192	0.0357795	-1.31219	2.81194	2.81194
FRMD4A	-0.329465	-0.532618	-0.126312	4.75784	-3.19059	0.00155981	0.0359921	-1.32232	2.80693	-2.80693
CRYBB1	-0.205213	-0.331783	-0.0786428	4.20242	-3.18976	0.00156412	0.0359974	-1.32474	2.80573	-2.80573
TRMT9B	-0.129536	-0.209435	-0.0496361	3.72626	-3.18955	0.00156522	0.0359974	-1.32536	2.80543	-2.80543
AQP1	1.01667	0.388891	1.64445	9.83497	3.18609	0.00158351	0.0362043	-1.33555	2.80038	2.80038
LAPTM5	0.521373	0.199489	0.843256	11.1393	3.18665	0.00158052	0.0362043	-1.3339	2.8012	2.8012
NIPSNAP2	0.45213	0.172928	0.731332	10.6701	3.18588	0.00158462	0.0362043	-1.33617	2.80008	2.80008
ZNF778	-0.201528	-0.325932	-0.0771238	5.09907	-3.18702	0.00157856	0.0362043	-1.33281	2.80174	-2.80174
DUOX2	-0.109674	-0.177454	-0.0418945	3.46277	-3.18338	0.0015979	0.0362255	-1.34349	2.79645	-2.79645
FOXD4	-0.15427	-0.249595	-0.0589445	3.72212	-3.18389	0.00159522	0.0362255	-1.34202	2.79718	-2.79718
FOXD4L1	-0.15427	-0.249595	-0.0589445	3.72212	-3.18389	0.00159522	0.0362255	-1.34202	2.79718	-2.79718
KCNJ9	-0.131818	-0.213296	-0.0503401	3.72103	-3.18288	0.00160063	0.0362255	-1.34499	2.79571	-2.79571
MYH15	-0.118282	-0.1914	-0.0451638	3.76419	-3.18257	0.00160227	0.0362255	-1.34589	2.79527	-2.79527
NXN	-0.437174	-0.707473	-0.166875	8.43071	-3.18196	0.00160556	0.0362255	-1.34769	2.79437	-2.79437
SLC1A3	0.698964	0.267127	1.1308	11.4238	3.18434	0.00159281	0.0362255	-1.34069	2.79784	2.79784
SSR3	0.313716	0.11974	0.507693	6.93837	3.1818	0.00160638	0.0362255	-1.34814	2.79415	2.79415
CBR1	0.503539	0.191991	0.815088	8.92274	3.17975	0.00161745	0.0364162	-1.35416	2.79117	2.79117
CHPT1	0.350912	0.133648	0.568176	9.93893	3.17757	0.00162929	0.0366236	-1.36056	2.788	2.788
CA5A	-0.183864	-0.297795	-0.0699333	4.55278	-3.17498	0.00164345	0.0368129	-1.36815	2.78424	-2.78424
CA5AP1	-0.183864	-0.297795	-0.0699333	4.55278	-3.17498	0.00164345	0.0368129	-1.36815	2.78424	-2.78424
MIR6881	-0.154457	-0.250193	-0.0587217	3.67944	-3.1741	0.0016483	0.0368129	-1.37073	2.78296	-2.78296
SEMA7A	-0.154457	-0.250193	-0.0587217	3.67944	-3.1741	0.0016483	0.0368129	-1.37073	2.78296	-2.78296
MCUB	0.491298	0.186612	0.795984	7.83173	3.17232	0.00165809	0.0369722	-1.37593	2.78039	2.78039
SLC22A18	0.442074	0.167871	0.716277	6.13189	3.17182	0.00166089	0.0369754	-1.3774	2.77966	2.77966
CNN3	0.467413	0.177438	0.757389	10.6168	3.17121	0.00166427	0.0369915	-1.37919	2.77878	2.77878
ZP2	-0.101195	-0.164	-0.0383895	3.82883	-3.16991	0.00167147	0.0370923	-1.38298	2.7769	-2.7769
ABCA1	0.518862	0.196577	0.841147	8.42775	3.16736	0.0016858	0.0372455	-1.39046	2.77319	2.77319
KLHL36	-0.172661	-0.279916	-0.0654073	4.80836	-3.16713	0.00168705	0.0372455	-1.39111	2.77287	-2.77287
NR2E1	0.822872	0.311825	1.33392	7.38169	3.16779	0.00168336	0.0372455	-1.38919	2.77382	2.77382
TRAM1	0.255723	0.0968365	0.414609	10.5923	3.16642	0.00169108	0.0372455	-1.3932	2.77183	2.77183
ZSCAN9	-0.245123	-0.397428	-0.0928167	5.59045	-3.1663	0.00169176	0.0372455	-1.39355	2.77166	-2.77166
FASTKD1	-0.193252	-0.313423	-0.0730803	8.21588	-3.16379	0.00170597	0.0374168	-1.40089	2.76803	-2.76803
SGSH	0.253636	0.0959117	0.41136	8.19612	3.16372	0.00170637	0.0374168	-1.40109	2.76793	2.76793
TLL2	-0.196664	-0.318968	-0.0743594	4.05618	-3.1635	0.00170761	0.0374168	-1.40173	2.76761	-2.76761
KYAT1	-0.259252	-0.420571	-0.0979319	6.66481	-3.16169	0.00171794	0.0375839	-1.40701	2.76499	-2.76499
BSCL2	0.383424	0.144441	0.622408	8.03557	3.15644	0.00174819	0.0377492	-1.42231	2.75741	2.75741
CST3	0.511314	0.192621	0.830007	11.7021	3.15646	0.00174808	0.0377492	-1.42226	2.75744	2.75744
FABP3P2	0.118809	0.0447631	0.192854	3.69356	3.1567	0.00174666	0.0377492	-1.42155	2.75779	2.75779
HNRNPUL2-BSCL2	0.383424	0.144441	0.622408	8.03557	3.15644	0.00174819	0.0377492	-1.42231	2.75741	2.75741
KLF1	-0.0931203	-0.151158	-0.0350824	3.55279	-3.15659	0.00174733	0.0377492	-1.42188	2.75762	-2.75762
MCM3AP-AS1	-0.34207	-0.555068	-0.129073	4.89197	-3.15955	0.0017302	0.0377492	-1.41325	2.7619	-2.7619
TPSD1	-0.104219	-0.169184	-0.0392549	3.67084	-3.15614	0.00174991	0.0377492	-1.42318	2.75698	-2.75698
TSPY11P	-0.148139	-0.24045	-0.0558273	3.87714	-3.15717	0.00174394	0.0377492	-1.42018	2.75847	-2.75847
TSPY13P	-0.148139	-0.24045	-0.0558273	3.87714	-3.15717	0.00174394	0.0377492	-1.42018	2.75847	-2.75847
ALOX12P2	-0.149096	-0.242113	-0.05608	4.20745	-3.1535	0.00176535	0.0378842	-1.43088	2.75317	-2.75317
CRELD1	0.224013	0.084246	0.363781	5.42134	3.15321	0.00176706	0.0378842	-1.43172	2.75275	2.75275
DDB2	0.387432	0.145707	0.629158	6.13602	3.15325	0.0017668	0.0378842	-1.43159	2.75281	2.75281
TOP3BP1	-0.133211	-0.216313	-0.0501087	4.1254	-3.15364	0.00176452	0.0378842	-1.43046	2.75337	-2.75337
ATAD5	-0.198489	-0.322496	-0.0744828	4.56806	-3.14903	0.00179173	0.0379862	-1.44387	2.74673	-2.74673
BDH1	0.362333	0.135957	0.58871	6.04075	3.14892	0.00179242	0.0379862	-1.44421	2.74656	2.74656
CNR1	0.744518	0.279116	1.20992	7.65043	3.14725	0.00180235	0.0379862	-1.44905	2.74416	2.74416
CXCL11	0.618242	0.23204	1.00444	4.1664	3.14941	0.00178951	0.0379862	-1.44278	2.74727	2.74727
INO80B	-0.149041	-0.242219	-0.0558637	4.98694	-3.14688	0.00180457	0.0379862	-1.45013	2.74363	-2.74363
INO80B-WBP1	-0.149041	-0.242219	-0.0558637	4.98694	-3.14688	0.00180457	0.0379862	-1.45013	2.74363	-2.74363
LAMA3	-0.485536	-0.788848	-0.182224	4.55931	-3.14932	0.00179004	0.0379862	-1.44304	2.74714	-2.74714
LATS1	-0.0902839	-0.146703	-0.0338653	3.93729	-3.14828	0.00179624	0.0379862	-1.44607	2.74564	-2.74564
SEC24A	0.225089	0.0845723	0.365605	8.80514	3.15146	0.00177736	0.0379862	-1.43682	2.75022	2.75022
SPATA6	0.374182	0.140528	0.607836	6.16685	3.1506	0.00178241	0.0379862	-1.4393	2.74899	2.74899
STAM	-0.344178	-0.55924	-0.129116	7.53554	-3.14851	0.00179487	0.0379862	-1.4454	2.74597	-2.74597
ZNF821	-0.251304	-0.408349	-0.0942595	5.4785	-3.14819	0.00179673	0.0379862	-1.44631	2.74552	-2.74552
ENC1	0.468833	0.175495	0.762172	9.48993	3.14437	0.00181964	0.038021	-1.45741	2.74001	2.74001
KIF13A	-0.24652	-0.400765	-0.092276	4.12274	-3.14433	0.00181989	0.038021	-1.45753	2.73996	-2.73996
PWAR5	-0.227312	-0.369528	-0.0850972	4.38006	-3.14458	0.00181842	0.038021	-1.45682	2.74031	-2.74031
SNORD108	-0.227312	-0.369528	-0.0850972	4.38006	-3.14458	0.00181842	0.038021	-1.45682	2.74031	-2.74031
TAF1C	-0.274307	-0.445928	-0.102686	5.90818	-3.1445	0.00181888	0.038021	-1.45704	2.7402	-2.7402
SSX5	-0.117903	-0.191711	-0.0440952	3.86867	-3.14273	0.00182956	0.0381656	-1.46217	2.73765	-2.73765
PRDX1	0.256447	0.0957603	0.417134	11.7839	3.1398	0.0018474	0.03848	-1.47067	2.73344	2.73344
CAVIN1	0.465061	0.173483	0.756638	8.31559	3.13791	0.001859	0.0386639	-1.47615	2.73072	2.73072
SOX3	-0.4729	-0.769484	-0.176317	4.72869	-3.13695	0.00186494	0.0387294	-1.47894	2.72934	-2.72934
UPK3BP1	-0.153553	-0.24989	-0.0572158	5.70183	-3.13581	0.00187199	0.038818	-1.48225	2.7277	-2.7277
ANXA2P2	0.461079	0.171695	0.750463	8.7532	3.13462	0.00187933	0.0388543	-1.48567	2.726	2.726
P2RY4	-0.0998102	-0.162453	-0.0371679	3.84574	-3.13467	0.00187902	0.0388543	-1.48553	2.72607	-2.72607
MTUS1	0.422347	0.157168	0.687526	8.69019	3.1334	0.00188696	0.0389543	-1.48922	2.72424	2.72424
ZNF204P	0.354722	0.131952	0.577492	4.93639	3.13268	0.00189141	0.0389883	-1.49129	2.72321	2.72321
FAM242E	-0.22945	-0.373632	-0.0852685	4.40897	-3.13086	0.00190287	0.0391086	-1.49657	2.72059	-2.72059
FAM242F	-0.22945	-0.373632	-0.0852685	4.40897	-3.13086	0.00190287	0.0391086	-1.49657	2.72059	-2.72059
CCNE1	-0.362047	-0.589917	-0.134177	5.42488	-3.12581	0.00193481	0.0397064	-1.51114	2.71336	-2.71336
HIST1H1C	-0.564919	-0.920689	-0.20915	7.9604	-3.12394	0.00194682	0.0398048	-1.51656	2.71067	-2.71067
PARD6B	-0.0751441	-0.122466	-0.0278225	3.52377	-3.12407	0.00194599	0.0398048	-1.51619	2.71086	-2.71086
RAB1A	0.187061	0.0692475	0.304875	11.6294	3.12372	0.00194819	0.0398048	-1.51717	2.71037	2.71037
GJA5	-0.142903	-0.232949	-0.0528565	3.79684	-3.12219	0.00195803	0.0399473	-1.52159	2.70818	-2.70818
NME3	0.298153	0.110186	0.48612	7.0415	3.12064	0.00196811	0.0400355	-1.52608	2.70595	2.70595
SUPT3H	-0.22823	-0.372104	-0.084356	5.80516	-3.12087	0.00196662	0.0400355	-1.52542	2.70628	-2.70628
NUDT13	-0.187366	-0.305525	-0.0692066	3.99872	-3.11966	0.00197442	0.0400562	-1.52888	2.70456	-2.70456
THBS4	0.748087	0.276308	1.21987	7.2831	3.11959	0.00197489	0.0400562	-1.52908	2.70446	2.70446
CDHR1	-0.238349	-0.388779	-0.0879197	4.55285	-3.1172	0.00199049	0.0401969	-1.53597	2.70104	-2.70104
RAB8A	0.219748	0.0810694	0.358427	8.68837	3.11745	0.00198885	0.0401969	-1.53525	2.7014	2.7014
RGN	0.504244	0.186054	0.822434	6.79926	3.11773	0.00198703	0.0401969	-1.53445	2.7018	2.7018
NDRG1	0.532076	0.196215	0.867936	9.79156	3.11673	0.00199361	0.0402015	-1.53734	2.70036	2.70036
HPSE2	-0.192591	-0.314248	-0.0709348	4.06357	-3.11448	0.00200838	0.0404407	-1.54379	2.69715	-2.69715
LONRF3	-0.167295	-0.273002	-0.0615884	4.36788	-3.11362	0.0020141	0.0404974	-1.54629	2.69592	-2.69592
AGAP10P	-0.298881	-0.488121	-0.109641	6.76131	-3.1072	0.00205701	0.0405686	-1.56472	2.68676	-2.68676
AGAP11	-0.298881	-0.488121	-0.109641	6.76131	-3.1072	0.00205701	0.0405686	-1.56472	2.68676	-2.68676
AGAP12P	-0.298881	-0.488121	-0.109641	6.76131	-3.1072	0.00205701	0.0405686	-1.56472	2.68676	-2.68676
AGAP14P	-0.298881	-0.488121	-0.109641	6.76131	-3.1072	0.00205701	0.0405686	-1.56472	2.68676	-2.68676
AGAP4	-0.298881	-0.488121	-0.109641	6.76131	-3.1072	0.00205701	0.0405686	-1.56472	2.68676	-2.68676
AGAP5	-0.298881	-0.488121	-0.109641	6.76131	-3.1072	0.00205701	0.0405686	-1.56472	2.68676	-2.68676
AGAP6	-0.298881	-0.488121	-0.109641	6.76131	-3.1072	0.00205701	0.0405686	-1.56472	2.68676	-2.68676
AGAP7P	-0.298881	-0.488121	-0.109641	6.76131	-3.1072	0.00205701	0.0405686	-1.56472	2.68676	-2.68676
AGAP9	-0.298881	-0.488121	-0.109641	6.76131	-3.1072	0.00205701	0.0405686	-1.56472	2.68676	-2.68676
DNAJB2	0.341518	0.125485	0.557551	6.62834	3.11013	0.00203732	0.0405686	-1.55631	2.69094	2.69094
GCA	0.396196	0.145288	0.647105	6.69532	3.10656	0.00206138	0.0405686	-1.56658	2.68584	2.68584
IL12RB1	-0.143924	-0.234927	-0.0529199	3.97485	-3.11141	0.00202877	0.0405686	-1.55263	2.69277	-2.69277
KLHL1	-0.15783	-0.257751	-0.0579082	3.89002	-3.10752	0.00205484	0.0405686	-1.5638	2.68722	-2.68722
REXO5	-0.403811	-0.659525	-0.148097	5.62747	-3.10677	0.00205996	0.0405686	-1.56598	2.68614	-2.68614
SMARCA2	0.27444	0.100905	0.447976	8.11433	3.11131	0.00202943	0.0405686	-1.55292	2.69263	2.69263
MX1	0.654055	0.239723	1.06839	7.85785	3.10564	0.00206762	0.040634	-1.56922	2.68453	2.68453
RPL22	-0.144562	-0.236191	-0.0529339	12.2858	-3.10391	0.00207935	0.0407494	-1.57417	2.68207	-2.68207
RPL22P1	-0.144562	-0.236191	-0.0529339	12.2858	-3.10391	0.00207935	0.0407494	-1.57417	2.68207	-2.68207
LMAN2	0.22866	0.083686	0.373633	7.70294	3.10303	0.00208541	0.0408106	-1.57671	2.68081	2.68081
EDRF1	-0.300188	-0.490541	-0.109834	6.77583	-3.10254	0.00208876	0.0408188	-1.57811	2.68011	-2.68011
ELK3	0.378364	0.138297	0.61843	8.38631	3.10072	0.00210121	0.040876	-1.58331	2.67753	2.67753
HIST1H4E	-0.138505	-0.226402	-0.050608	4.3084	-3.1001	0.00210549	0.040876	-1.58509	2.67665	-2.67665
MORC2	-0.25674	-0.419654	-0.0938265	7.45413	-3.10042	0.00210326	0.040876	-1.58416	2.67711	-2.67711
PCDH11X	-0.667679	-1.09153	-0.243827	4.75435	-3.09912	0.00211225	0.040876	-1.58789	2.67525	-2.67525
PCDH11Y	-0.667679	-1.09153	-0.243827	4.75435	-3.09912	0.00211225	0.040876	-1.58789	2.67525	-2.67525
PCGF2	-0.344124	-0.562553	-0.125695	7.71323	-3.09949	0.00210973	0.040876	-1.58685	2.67577	-2.67577
RPP30	-0.278339	-0.454986	-0.101693	7.52469	-3.09995	0.00210656	0.040876	-1.58553	2.67643	-2.67643
SERPINA2	-0.0998009	-0.163184	-0.0364183	3.69779	-3.09777	0.00212163	0.0410005	-1.59176	2.67333	-2.67333
MAGEC3	-0.10145	-0.165909	-0.0369923	3.82958	-3.09643	0.002131	0.0411244	-1.59562	2.67142	-2.67142
LRCH4	-0.21884	-0.357923	-0.0797567	6.37706	-3.09554	0.00213716	0.0411862	-1.59814	2.67016	-2.67016
KRT18P27	-0.123912	-0.202744	-0.0450795	3.57587	-3.09238	0.00215937	0.0414421	-1.60718	2.66567	-2.66567
MICU1	-0.299389	-0.489839	-0.108938	7.55796	-3.0927	0.00215712	0.0414421	-1.60626	2.66613	-2.66613
MIR622	-0.123912	-0.202744	-0.0450795	3.57587	-3.09238	0.00215937	0.0414421	-1.60718	2.66567	-2.66567
CTSL	0.317971	0.115493	0.520449	9.12529	3.08955	0.00217948	0.0415212	-1.61528	2.66165	2.66165
FGFR4	-0.181481	-0.297101	-0.0658604	4.193	-3.08803	0.00219035	0.0415212	-1.61962	2.65949	-2.65949
GBF1	-0.207392	-0.339475	-0.0753096	5.35399	-3.0891	0.00218269	0.0415212	-1.61656	2.66101	-2.66101
MSH4	-0.110174	-0.18036	-0.0399887	3.61857	-3.08828	0.0021885	0.0415212	-1.61888	2.65985	-2.65985
NDST4	-0.232097	-0.379903	-0.0842905	3.6747	-3.08931	0.00218119	0.0415212	-1.61596	2.66131	-2.66131
PDE6C	-0.0763053	-0.1249	-0.0277102	3.30058	-3.08921	0.00218191	0.0415212	-1.61625	2.66116	-2.66116
SLC25A16	-0.231288	-0.378582	-0.0839927	4.60958	-3.08923	0.00218178	0.0415212	-1.6162	2.66119	-2.66119
TRGV3	-0.202086	-0.330818	-0.0733537	4.65887	-3.0884	0.00218767	0.0415212	-1.61855	2.66002	-2.66002
TRGV5	-0.202086	-0.330818	-0.0733537	4.65887	-3.0884	0.00218767	0.0415212	-1.61855	2.66002	-2.66002
CDX2	-0.146002	-0.239071	-0.0529327	4.09601	-3.08629	0.00220279	0.0415537	-1.62457	2.65703	-2.65703
CELA2B	-0.104424	-0.170993	-0.037855	3.84326	-3.08612	0.00220401	0.0415537	-1.62505	2.65679	-2.65679
GDAP2	-0.135956	-0.222597	-0.0493145	4.25235	-3.08715	0.00219663	0.0415537	-1.62212	2.65824	-2.65824
SMG7-AS1	-0.117237	-0.191959	-0.0425157	4.09843	-3.08677	0.00219937	0.0415537	-1.62321	2.6577	-2.6577
GLOD4	0.274088	0.0993073	0.448869	8.4129	3.08518	0.00221077	0.0415685	-1.62773	2.65545	2.65545
MLYCD	-0.16104	-0.263731	-0.0583483	4.82963	-3.0852	0.00221064	0.0415685	-1.62768	2.65548	-2.65548
LYPLA2P1	-0.196478	-0.321807	-0.0711491	6.40905	-3.08424	0.00221763	0.0415851	-1.63044	2.65411	-2.65411
LYPLA2P2	-0.196478	-0.321807	-0.0711491	6.40905	-3.08424	0.00221763	0.0415851	-1.63044	2.65411	-2.65411
FAM114A1	0.392461	0.142039	0.642884	8.38361	3.08325	0.0022248	0.0416634	-1.63326	2.65271	2.65271
P2RX6	-0.142906	-0.234106	-0.0517059	4.12015	-3.08276	0.00222833	0.0416733	-1.63464	2.65202	-2.65202
CNGA3	0.640326	0.231542	1.04911	6.72342	3.08171	0.00223594	0.0417036	-1.63762	2.65054	2.65054
FGF12	-0.429399	-0.703521	-0.155277	6.11556	-3.08178	0.00223545	0.0417036	-1.63743	2.65063	-2.65063
CDKN2A	-1.03296	-1.69259	-0.37333	6.1905	-3.08083	0.00224241	0.0417125	-1.64014	2.64928	-2.64928
GSAP	0.496274	0.179376	0.813172	7.62521	3.08096	0.00224143	0.0417125	-1.63976	2.64947	2.64947
SGF29	-0.184658	-0.302643	-0.0666722	6.53957	-3.0791	0.00225509	0.0418923	-1.64507	2.64684	-2.64684
PDZD7	-0.126107	-0.206713	-0.0455003	3.7076	-3.07789	0.002264	0.0420017	-1.64851	2.64512	-2.64512
EGR1	0.493085	0.177698	0.808472	9.88301	3.07583	0.00227922	0.0421716	-1.65436	2.64221	2.64221
TBKBP1	-0.142676	-0.233931	-0.0514221	4.37529	-3.07598	0.00227811	0.0421716	-1.65394	2.64242	-2.64242
C20orf27	-0.262616	-0.430718	-0.0945151	6.5447	-3.07352	0.00229647	0.0423219	-1.66094	2.63894	-2.63894
CALCR	-0.127984	-0.209904	-0.0460647	3.90146	-3.07365	0.00229551	0.0423219	-1.66058	2.63912	-2.63912
RASL10A	-0.534648	-0.876814	-0.192481	5.13148	-3.07408	0.00229228	0.0423219	-1.65935	2.63973	-2.63973
TM4SF20	-0.1387	-0.227509	-0.0498918	3.60515	-3.07261	0.00230326	0.0423909	-1.66352	2.63766	-2.63766
MBNL1	0.197906	0.0711007	0.324711	9.22436	3.07048	0.00231928	0.0426294	-1.66957	2.63465	2.63465
LYPLA2	-0.180435	-0.296062	-0.0648078	7.07251	-3.07005	0.0023225	0.0426322	-1.67078	2.63404	-2.63404
ELOCP3	-0.109221	-0.179224	-0.0392172	4.01134	-3.06952	0.00232655	0.0426504	-1.67231	2.63329	-2.63329
CASP4	0.495318	0.177592	0.813043	6.51926	3.06702	0.00234549	0.0429031	-1.67938	2.62977	2.62977
KIF1BP	-0.281634	-0.462299	-0.10097	8.17961	-3.06689	0.0023465	0.0429031	-1.67976	2.62958	-2.62958
OPA3	0.134429	0.0481835	0.220675	4.10079	3.06648	0.00234959	0.0429032	-1.68091	2.62901	2.62901
GSC2	-0.0950553	-0.156064	-0.034047	3.37609	-3.06529	0.00235869	0.0430129	-1.68428	2.62733	-2.62733
ANXA1	0.642785	0.229928	1.05564	10.5238	3.06303	0.00237611	0.0430202	-1.6907	2.62413	2.62413
DHX32	-0.195741	-0.321418	-0.0700648	8.18307	-3.06417	0.00236731	0.0430202	-1.68747	2.62574	-2.62574
HAVCR1	-0.161389	-0.265043	-0.0577355	3.80704	-3.06319	0.00237485	0.0430202	-1.69024	2.62436	-2.62436
IKZF5	-0.209145	-0.343442	-0.0748479	4.85912	-3.06384	0.00236985	0.0430202	-1.6884	2.62528	-2.62528
KDELR2	0.280796	0.100428	0.461164	10.0408	3.06279	0.00237798	0.0430202	-1.69139	2.62379	2.62379
LIN7C	0.18901	0.0675864	0.310434	9.08254	3.06243	0.00238074	0.0430202	-1.6924	2.62329	2.62329
SHH	-0.0979549	-0.160866	-0.0350438	3.83799	-3.06326	0.00237431	0.0430202	-1.69004	2.62446	-2.62446
SLC25A23	-0.300257	-0.493175	-0.10734	6.06222	-3.06201	0.00238395	0.0430225	-1.69358	2.6227	-2.6227
CRYGD	-0.173402	-0.284883	-0.0619207	4.16164	-3.06011	0.0023987	0.0431776	-1.69896	2.62002	-2.62002
GBX1	-0.15254	-0.250622	-0.0544581	4.05897	-3.05971	0.00240186	0.0431776	-1.70011	2.61945	-2.61945
NUCB1	0.302126	0.107878	0.496373	8.60103	3.05997	0.00239983	0.0431776	-1.69937	2.61982	2.61982
BCORL1	-0.165485	-0.271967	-0.0590039	5.97074	-3.05753	0.00241889	0.0434276	-1.70627	2.61639	-2.61639
FERMT1	-0.780023	-1.28206	-0.277989	6.58054	-3.05675	0.00242502	0.0434817	-1.70848	2.61528	-2.61528
MTHFD2	-0.432681	-0.711219	-0.154143	9.21435	-3.0561	0.00243007	0.0435162	-1.7103	2.61438	-2.61438
GGA2	-0.195207	-0.320899	-0.0695157	6.50117	-3.05545	0.00243525	0.0435527	-1.71215	2.61346	-2.61346
RNF122	-0.190172	-0.312683	-0.0676608	4.63222	-3.05391	0.00244744	0.0437146	-1.71651	2.61129	-2.61129
CLEC2B	0.596019	0.211939	0.980098	8.41858	3.05298	0.00245479	0.0437897	-1.71913	2.60998	2.60998
CYB5R2	0.475242	0.168913	0.781571	5.44815	3.05219	0.0024611	0.0438459	-1.72136	2.60887	2.60887
CCNF	-0.247769	-0.407507	-0.0880304	5.36989	-3.05156	0.00246608	0.0438785	-1.72313	2.60799	-2.60799
ATP6AP2	0.146346	0.0518648	0.240827	11.282	3.04733	0.00250003	0.0442562	-1.73505	2.60206	2.60206
MYCNOS	-0.156057	-0.256803	-0.0553106	4.08173	-3.04747	0.00249895	0.0442562	-1.73468	2.60224	-2.60224
TMEM132A	0.330134	0.117074	0.543194	6.52593	3.04841	0.00249136	0.0442562	-1.73202	2.60356	2.60356
ZNF33B	-0.186807	-0.307397	-0.0662169	4.29643	-3.04766	0.0024974	0.0442562	-1.73413	2.60251	-2.60251
KRTAP1-1	-0.0926874	-0.152551	-0.032824	3.7592	-3.0461	0.00251002	0.0443767	-1.73853	2.60032	-2.60032
AMOTL2	-0.46052	-0.75809	-0.16295	7.95292	-3.04469	0.00252145	0.0445099	-1.74249	2.59835	-2.59835
CNOT9	-0.164392	-0.270627	-0.0581574	7.97563	-3.04439	0.00252396	0.0445099	-1.74336	2.59792	-2.59792
CLCN1	-0.130636	-0.215103	-0.0461687	4.21113	-3.04271	0.00253769	0.0446955	-1.74809	2.59556	-2.59556
AP2A2	0.222902	0.0787111	0.367092	8.4103	3.04131	0.00254912	0.04484	-1.75201	2.59361	2.59361
LPAR1	0.576789	0.20353	0.950048	8.36999	3.04012	0.00255893	0.0449558	-1.75536	2.59194	2.59194
PRPF18	-0.269667	-0.444238	-0.0950964	6.60707	-3.03908	0.00256759	0.0449942	-1.7583	2.59048	-2.59048
SMC6	-0.282568	-0.465475	-0.09966	7.32405	-3.03931	0.00256563	0.0449942	-1.75764	2.59081	-2.59081
RAB5C	-0.159671	-0.263088	-0.0562533	8.67314	-3.0375	0.00258064	0.0451661	-1.76272	2.58827	-2.58827
DEPP1	0.518459	0.182233	0.854685	8.24483	3.03367	0.00261272	0.0455729	-1.77349	2.58291	2.58291
INTS8	-0.186921	-0.30815	-0.0656911	8.27356	-3.03343	0.00261477	0.0455729	-1.77417	2.58257	-2.58257
LITAF	0.288839	0.101493	0.476186	9.49849	3.03316	0.00261699	0.0455729	-1.77491	2.5822	2.5822
OPLAH	0.217632	0.0765135	0.358751	4.12273	3.03405	0.00260949	0.0455729	-1.77241	2.58345	2.58345
CPT1B	-0.288298	-0.475326	-0.101269	4.68327	-3.03262	0.00262155	0.0455953	-1.77643	2.58144	-2.58144
HIST1H2BG	-0.307098	-0.506539	-0.107657	4.25865	-3.02933	0.00264946	0.0459363	-1.78566	2.57684	-2.57684
RBP3	-0.0946615	-0.156142	-0.0331809	3.71851	-3.02914	0.00265106	0.0459363	-1.78618	2.57658	-2.57658
SUCLG1	-0.192844	-0.318072	-0.067616	10.3621	-3.02963	0.0026469	0.0459363	-1.78482	2.57726	-2.57726
APEX2	-0.194389	-0.320782	-0.0679958	6.5965	-3.02575	0.00268016	0.0462473	-1.79569	2.57184	-2.57184
PLAT	0.543725	0.190233	0.897217	8.99529	3.02611	0.00267707	0.0462473	-1.79469	2.57234	2.57234
PQBP1	-0.269287	-0.444428	-0.0941457	7.97727	-3.02491	0.00268744	0.0462473	-1.79806	2.57066	-2.57066
SNORA11F	-0.131245	-0.216605	-0.0458857	3.9168	-3.02494	0.00268716	0.0462473	-1.79797	2.57071	-2.57071
SUN1	0.263298	0.0920495	0.434547	9.04563	3.02486	0.00268784	0.0462473	-1.79819	2.5706	2.5706
TRDMT1	-0.234533	-0.38708	-0.0819867	4.71777	-3.02473	0.00268895	0.0462473	-1.79855	2.57042	-2.57042
TOX3	-0.795841	-1.31369	-0.277989	7.09219	-3.02347	0.00269988	0.046378	-1.80208	2.56866	-2.56866
SLC38A6	0.352711	0.123119	0.582302	6.10728	3.02237	0.00270947	0.0464852	-1.80517	2.56712	2.56712
CTSB	0.286646	0.100009	0.473283	11.9443	3.02157	0.00271635	0.0465384	-1.80738	2.56601	2.56601
ESS2	-0.216713	-0.357831	-0.0755943	7.51499	-3.02124	0.00271925	0.0465384	-1.80831	2.56555	-2.56555
RNF121	-0.21527	-0.355483	-0.0750578	5.40991	-3.02052	0.00272553	0.0465885	-1.81032	2.56455	-2.56455
KIF3B	0.26479	0.0922673	0.437312	7.64794	3.01954	0.00273418	0.046679	-1.81307	2.56317	2.56317
TBC1D22B	-0.0921485	-0.152237	-0.0320599	3.56437	-3.01704	0.00275618	0.0469969	-1.82005	2.55969	-2.55969
NCAPH2	-0.16809	-0.277721	-0.0584593	5.94141	-3.01644	0.0027615	0.04703	-1.82173	2.55885	-2.55885
GLUL	0.311956	0.108379	0.515533	12.085	3.01474	0.00277655	0.0472034	-1.82647	2.55649	2.55649
MOXD1	0.858227	0.298124	1.41833	7.16639	3.01453	0.00277847	0.0472034	-1.82707	2.5562	2.5562
NACA2	-0.105373	-0.174154	-0.036591	3.6916	-3.01398	0.00278335	0.0472288	-1.8286	2.55543	-2.55543
TESPA1	0.113246	0.0393074	0.187184	3.72203	3.01326	0.00278976	0.0472798	-1.8306	2.55443	2.55443
HLA-DPA1	0.559058	0.19383	0.924287	12.0403	3.01146	0.00280591	0.0474956	-1.83562	2.55193	2.55193
CORO7	-0.184079	-0.304354	-0.0638032	4.93917	-3.011	0.00281001	0.0475066	-1.83689	2.55129	-2.55129
TNIP1	0.252927	0.087646	0.418208	7.18347	3.01063	0.00281338	0.0475066	-1.83794	2.55077	2.55077
EXOSC4	-0.23523	-0.389007	-0.0814535	8.49131	-3.00945	0.00282399	0.0475126	-1.84121	2.54914	-2.54914
MIR6847	-0.23523	-0.389007	-0.0814535	8.49131	-3.00945	0.00282399	0.0475126	-1.84121	2.54914	-2.54914
XRCC3	-0.13346	-0.220704	-0.0462161	3.8246	-3.00954	0.00282317	0.0475126	-1.84096	2.54926	-2.54926
TMF1	0.214238	0.0741557	0.354321	6.32875	3.00883	0.0028296	0.0475496	-1.84294	2.54827	2.54827
ADGRE5	0.406099	0.140456	0.671741	6.54741	3.00759	0.00284084	0.0476601	-1.84639	2.54655	2.54655
OBP2B	-0.102364	-0.169329	-0.035399	3.79047	-3.00735	0.00284303	0.0476601	-1.84706	2.54622	-2.54622
PRR14	-0.181558	-0.30045	-0.0626666	7.65302	-3.00434	0.00287052	0.048063	-1.85544	2.54204	-2.54204
FTH1P5	0.153229	0.0528239	0.253633	11.6121	3.00241	0.00288826	0.0483019	-1.8608	2.53936	2.53936
CNOT2	0.238595	0.0821232	0.395066	8.65909	2.99992	0.00291132	0.0483383	-1.86772	2.53591	2.53591
F2	-0.191216	-0.316605	-0.0658279	3.81474	-3.00021	0.00290863	0.0483383	-1.86691	2.53631	-2.53631
HDHD3	0.238046	0.0820138	0.394079	4.60619	3.00145	0.00289716	0.0483383	-1.86348	2.53803	2.53803
KIF25-AS1	-0.149275	-0.247159	-0.0513908	4.23593	-3.00027	0.00290815	0.0483383	-1.86677	2.53638	-2.53638
PIP5K1A	-0.246809	-0.408634	-0.0849834	7.38603	-3.00054	0.00290562	0.0483383	-1.86601	2.53676	-2.53676
RNF115	-0.201743	-0.334046	-0.0694402	7.86785	-2.99995	0.00291108	0.0483383	-1.86765	2.53595	-2.53595
RPS6KB1	-0.17211	-0.284995	-0.0592257	6.58629	-2.99956	0.00291475	0.0483383	-1.86874	2.5354	-2.5354
COL5A2	0.643305	0.220468	1.06614	8.63012	2.99315	0.00297487	0.0483566	-1.8865	2.52653	2.52653
CPD	0.34759	0.119456	0.575725	8.57834	2.99751	0.0029338	0.0483566	-1.87441	2.53257	2.53257
CPPED1	0.236276	0.0810807	0.391471	4.46227	2.9952	0.00295552	0.0483566	-1.88083	2.52937	2.52937
FABP5	0.805237	0.275762	1.33471	9.71504	2.99201	0.00298574	0.0483566	-1.88968	2.52495	2.52495
FABP5P1	0.805237	0.275762	1.33471	9.71504	2.99201	0.00298574	0.0483566	-1.88968	2.52495	2.52495
FABP5P11	0.805237	0.275762	1.33471	9.71504	2.99201	0.00298574	0.0483566	-1.88968	2.52495	2.52495
FABP5P2	0.805237	0.275762	1.33471	9.71504	2.99201	0.00298574	0.0483566	-1.88968	2.52495	2.52495
FABP5P7	0.805237	0.275762	1.33471	9.71504	2.99201	0.00298574	0.0483566	-1.88968	2.52495	2.52495
GCNT4	-0.113392	-0.187895	-0.0388894	3.70792	-2.9943	0.00296405	0.0483566	-1.88333	2.52812	-2.52812
HSF2BP	-0.195808	-0.32443	-0.0671859	4.32531	-2.99502	0.00295724	0.0483566	-1.88134	2.52911	-2.52911
IRF7	0.293922	0.100964	0.48688	6.7222	2.99678	0.0029407	0.0483566	-1.87645	2.53155	2.53155
MEF2D	-0.144925	-0.240173	-0.0496768	4.50526	-2.99345	0.0029721	0.0483566	-1.88569	2.52694	-2.52694
MIR4668	0.322625	0.110967	0.534282	9.29399	2.99881	0.00292168	0.0483566	-1.87081	2.53437	2.53437
NKX2-8	-0.103526	-0.171611	-0.0354407	3.7367	-2.99144	0.00299112	0.0483566	-1.89124	2.52417	-2.52417
NXF3	-0.131826	-0.218449	-0.0452035	3.64825	-2.99402	0.00296664	0.0483566	-1.88409	2.52774	-2.52774
PRPS2	0.387952	0.132989	0.642914	7.65421	2.99355	0.00297114	0.0483566	-1.88541	2.52708	2.52708
TOE1	-0.164771	-0.27306	-0.0564812	6.72106	-2.99349	0.00297164	0.0483566	-1.88556	2.527	-2.527
TVP23B	0.28675	0.0983172	0.475182	7.05712	2.99386	0.00296816	0.0483566	-1.88454	2.52751	2.52751
TVP23C	0.28675	0.0983172	0.475182	7.05712	2.99386	0.00296816	0.0483566	-1.88454	2.52751	2.52751
TVP23CP2	0.28675	0.0983172	0.475182	7.05712	2.99386	0.00296816	0.0483566	-1.88454	2.52751	2.52751
TYR	-0.158173	-0.262202	-0.0541441	3.90676	-2.99132	0.00299231	0.0483566	-1.89159	2.52399	-2.52399
TYRL	-0.158173	-0.262202	-0.0541441	3.90676	-2.99132	0.00299231	0.0483566	-1.89159	2.52399	-2.52399
MAGT1	0.333727	0.114198	0.553256	8.54153	2.99078	0.00299748	0.048384	-1.89309	2.52324	2.52324
FNDC3B	0.395342	0.135219	0.655465	8.43992	2.99005	0.00300441	0.0484396	-1.8951	2.52224	2.52224
ERCC6	-0.116075	-0.192519	-0.0396305	3.89963	-2.98729	0.0030309	0.0485294	-1.90273	2.51843	-2.51843
GOLGA6A	-0.0888614	-0.147374	-0.0303488	3.63584	-2.98778	0.00302624	0.0485294	-1.90139	2.5191	-2.5191
GOLGA6C	-0.0888614	-0.147374	-0.0303488	3.63584	-2.98778	0.00302624	0.0485294	-1.90139	2.5191	-2.5191
GOLGA6D	-0.0888614	-0.147374	-0.0303488	3.63584	-2.98778	0.00302624	0.0485294	-1.90139	2.5191	-2.5191
RAB36	0.295324	0.100889	0.48976	5.05631	2.9882	0.00302222	0.0485294	-1.90024	2.51967	2.51967
TNFRSF11B	0.560089	0.19124	0.928939	5.48444	2.9874	0.00302992	0.0485294	-1.90245	2.51857	2.51857
PSG6	-0.139284	-0.231039	-0.0475293	3.95288	-2.98647	0.00303886	0.0486009	-1.90501	2.51729	-2.51729
TLK1	0.263759	0.0899223	0.437596	8.04726	2.98504	0.00305268	0.0487659	-1.90896	2.51532	2.51532
JRK	-0.228196	-0.378713	-0.0776795	6.63613	-2.98269	0.00307557	0.0490188	-1.91545	2.51207	-2.51207
RAP1A	0.180421	0.0614222	0.299419	10.2504	2.98284	0.00307416	0.0490188	-1.91505	2.51227	2.51227
ATP11A	-0.200946	-0.333505	-0.0683869	4.514	-2.98232	0.00307919	0.0490204	-1.91647	2.51156	-2.51156
NKAIN1	-0.284351	-0.471985	-0.0967173	4.59361	-2.98146	0.00308767	0.0490993	-1.91887	2.51037	-2.51037
KLHL26	0.368992	0.125017	0.612968	5.69226	2.97547	0.00314692	0.0499844	-1.93539	2.50211	2.50211
MFSD1	0.254121	0.0860182	0.422224	10.0426	2.97407	0.00316097	0.0501271	-1.93926	2.50018	2.50018
PLEKHO2	0.281264	0.0951927	0.467336	7.07811	2.97385	0.00316311	0.0501271	-1.93984	2.49988	2.49988
SSH3	0.21843	0.0738857	0.362974	6.12105	2.97301	0.00317157	0.0502039	-1.94217	2.49872	2.49872
TFRC	0.363121	0.122764	0.603477	10.8523	2.97221	0.00317957	0.0502162	-1.94435	2.49763	2.49763
USP8	0.175751	0.0594288	0.292072	8.02786	2.97249	0.00317677	0.0502162	-1.94359	2.49801	2.49801
AHSP	-0.17034	-0.283189	-0.0574918	4.39328	-2.96966	0.0032054	0.0502251	-1.95138	2.49412	-2.49412
ALAS2	-0.227943	-0.378936	-0.0769494	4.47457	-2.96998	0.00320219	0.0502251	-1.95051	2.49455	-2.49455
ANXA5	0.329911	0.111484	0.548338	11.3768	2.97149	0.00318684	0.0502251	-1.94634	2.49664	2.49664
GPR63	-0.124817	-0.207492	-0.0421413	3.83737	-2.97017	0.00320024	0.0502251	-1.94998	2.49482	-2.49482
HLA-DRA	0.657544	0.222124	1.09296	10.7864	2.97099	0.00319193	0.0502251	-1.94773	2.49595	2.49595
HLA-DRB1	0.545159	0.184156	0.906162	10.9453	2.97096	0.00319222	0.0502251	-1.9478	2.49591	2.49591
PDCD4-AS1	-0.164424	-0.273334	-0.0555145	4.08411	-2.97019	0.00320003	0.0502251	-1.94993	2.49485	-2.49485
CD164	0.255555	0.0860898	0.42502	10.7599	2.9668	0.00323452	0.0506245	-1.95924	2.49019	2.49019
ACSM3	-0.183561	-0.305314	-0.0618072	3.83569	-2.96608	0.0032419	0.0506591	-1.96122	2.4892	-2.4892
GUCY2F	-0.0754681	-0.125529	-0.0254076	3.44944	-2.96588	0.00324401	0.0506591	-1.96179	2.48892	-2.48892
VANGL1	-0.289409	-0.481421	-0.097396	4.55467	-2.96529	0.00325009	0.050697	-1.96341	2.48811	-2.48811
ZNF32	-0.295597	-0.491873	-0.0993216	7.27672	-2.96291	0.00327456	0.0510216	-1.96993	2.48485	-2.48485
SMPD3	-0.180887	-0.301032	-0.0607419	4.10427	-2.96201	0.00328394	0.0511105	-1.97241	2.4836	-2.4836
ARNTL	0.380089	0.12755	0.632628	8.37612	2.96102	0.00329418	0.0511181	-1.97511	2.48225	2.48225
RARRES3	0.527471	0.176994	0.877947	8.27985	2.9609	0.00329545	0.0511181	-1.97545	2.48209	2.48209
ZC4H2	-0.348325	-0.579757	-0.116893	5.67671	-2.96105	0.00329391	0.0511181	-1.97504	2.48229	-2.48229
STK17B	-0.29436	-0.489983	-0.0987365	5.30175	-2.96035	0.00330121	0.0511504	-1.97696	2.48133	-2.48133
CABP2	-0.0841552	-0.140121	-0.0281893	3.67895	-2.9583	0.00332263	0.0512119	-1.98258	2.47852	-2.47852
CRK	0.180914	0.0606354	0.301192	9.31199	2.95916	0.00331358	0.0512119	-1.98021	2.4797	2.4797
ERBB2	0.43593	0.146085	0.725776	6.44977	2.95893	0.00331602	0.0512119	-1.98085	2.47938	2.47938
HLA-J	0.313734	0.105085	0.522384	8.90457	2.95821	0.00332358	0.0512119	-1.98283	2.47839	2.47839
PIK3C2A	0.305778	0.102445	0.509111	9.55944	2.95858	0.00331974	0.0512119	-1.98182	2.4789	2.4789
ABCC3	0.709662	0.237342	1.18198	7.54452	2.95597	0.00334717	0.0513431	-1.98897	2.47532	2.47532
ACP2	0.255881	0.0855592	0.426202	7.35439	2.95565	0.00335055	0.0513431	-1.98984	2.47488	2.47488
ADO	-0.217889	-0.362899	-0.0728786	7.80417	-2.95612	0.00334563	0.0513431	-1.98857	2.47552	-2.47552
CBL	-0.117336	-0.195412	-0.03926	3.90661	-2.95664	0.00334006	0.0513431	-1.98712	2.47625	-2.47625
CMC2	-0.229568	-0.382377	-0.0767593	9.84962	-2.95562	0.0033509	0.0513431	-1.98994	2.47484	-2.47484
MIIP	-0.211615	-0.352488	-0.0707412	6.21361	-2.9553	0.00335424	0.0513431	-1.9908	2.47441	-2.47441
COL16A1	0.49112	0.16408	0.818159	6.20819	2.95442	0.00336358	0.0514294	-1.99321	2.4732	2.4732
VAX2	-0.352246	-0.586894	-0.117599	5.50991	-2.95335	0.00337492	0.0515463	-1.99614	2.47174	-2.47174
PLK1	-0.358214	-0.597013	-0.119416	5.23056	-2.95118	0.00339809	0.0517864	-2.00207	2.46876	-2.46876
SYNC	0.516497	0.172207	0.860786	6.27397	2.9514	0.0033957	0.0517864	-2.00146	2.46907	2.46907
CYP2C19	-0.103038	-0.171746	-0.0343297	3.6131	-2.95035	0.00340704	0.0518353	-2.00436	2.46762	-2.46762
PPRC1	-0.210382	-0.350677	-0.0700864	5.98447	-2.95019	0.00340875	0.0518353	-2.00479	2.4674	-2.4674
ANGPTL7	-0.118858	-0.198144	-0.039572	3.68156	-2.94929	0.00341844	0.0518511	-2.00726	2.46617	-2.46617
CIAPIN1	-0.229578	-0.382734	-0.0764225	8.9288	-2.94905	0.00342096	0.0518511	-2.0079	2.46585	-2.46585
ZNF136	0.257799	0.0858435	0.429754	6.56034	2.94951	0.00341599	0.0518511	-2.00663	2.46648	2.46648
ANGPT1	0.621804	0.206792	1.03681	6.84475	2.94766	0.00343593	0.0520212	-2.01168	2.46396	2.46396
ADGRL2	0.491141	0.163127	0.819155	6.32784	2.94577	0.0034565	0.0520402	-2.01686	2.46136	2.46136
CFI	0.613859	0.203799	1.02392	7.7092	2.94514	0.00346336	0.0520402	-2.01859	2.4605	2.4605
CYP4F12	-0.181914	-0.30337	-0.0604583	4.36681	-2.94668	0.00344659	0.0520402	-2.01437	2.46261	-2.46261
DNMT3L	-0.0941505	-0.157041	-0.0312598	4.11881	-2.94524	0.0034622	0.0520402	-2.01829	2.46065	-2.46065
ENO1	0.289905	0.0963371	0.483473	11.111	2.9465	0.0034485	0.0520402	-2.01485	2.46237	2.46237
GTPBP4	-0.256518	-0.427804	-0.0852327	8.02447	-2.94634	0.00345031	0.0520402	-2.01531	2.46214	-2.46214
VPS72	-0.251495	-0.419446	-0.0835437	9.10347	-2.94599	0.0034541	0.0520402	-2.01626	2.46166	-2.46166
IVNS1ABP	-0.24392	-0.406909	-0.0809311	8.55711	-2.94425	0.0034731	0.0521302	-2.02102	2.45928	-2.45928
PRDM16	-0.120698	-0.201363	-0.0400332	3.97403	-2.94375	0.00347854	0.0521555	-2.02238	2.4586	-2.4586
BIRC7	-0.145867	-0.243413	-0.0483209	4.24662	-2.94193	0.00349851	0.0522473	-2.02735	2.45612	-2.45612
JCAD	-0.328794	-0.548654	-0.108934	4.58148	-2.94213	0.0034963	0.0522473	-2.0268	2.45639	-2.45639
MIR3196	-0.145867	-0.243413	-0.0483209	4.24662	-2.94193	0.00349851	0.0522473	-2.02735	2.45612	-2.45612
RPS28	-0.0995712	-0.166176	-0.0329668	12.6735	-2.94114	0.00350719	0.0522473	-2.02949	2.45504	-2.45504
RPS28P7	-0.0995712	-0.166176	-0.0329668	12.6735	-2.94114	0.00350719	0.0522473	-2.02949	2.45504	-2.45504
TSPAN13	0.389311	0.1289	0.649722	10.1894	2.94119	0.00350664	0.0522473	-2.02936	2.45511	2.45511
SYNPO	0.526059	0.174064	0.878055	6.61437	2.94024	0.00351715	0.0523398	-2.03196	2.45381	2.45381
CSNK2A2	-0.225227	-0.376025	-0.0744283	7.46814	-2.93838	0.00353773	0.0525897	-2.03702	2.45127	-2.45127
OSBPL10	0.490992	0.162146	0.819839	6.95753	2.93742	0.00354841	0.0526687	-2.03963	2.44997	2.44997
SLC6A6	-0.173178	-0.289174	-0.0571826	4.00446	-2.93722	0.00355061	0.0526687	-2.04017	2.4497	-2.4497
AVPR2	-0.12294	-0.205301	-0.0405789	4.01038	-2.93668	0.00355667	0.0527024	-2.04165	2.44896	-2.44896
KRTAP4-7	-0.0731444	-0.12218	-0.0241088	3.43371	-2.93464	0.00357952	0.0529845	-2.0472	2.44618	-2.44618
PCNX2	0.298881	0.0983249	0.499437	5.78076	2.93189	0.00361051	0.0533298	-2.05468	2.44243	2.44243
TSPO2	-0.0983132	-0.164279	-0.032347	3.70739	-2.93208	0.00360837	0.0533298	-2.05416	2.44269	-2.44269
NGFR	0.455776	0.149713	0.761839	4.66127	2.92972	0.00363513	0.0536365	-2.06057	2.43948	2.43948
C5orf22	0.204564	0.0671701	0.341958	7.70216	2.92918	0.00364127	0.0536701	-2.06203	2.43875	2.43875
MAFF	0.505434	0.165849	0.845019	8.6324	2.9282	0.00365244	0.0537778	-2.06469	2.43742	2.43742
ERCC6L	-0.242658	-0.405763	-0.079553	4.40894	-2.92693	0.00366703	0.0539356	-2.06814	2.43569	-2.43569
RPL37A	-0.0636929	-0.106519	-0.0208664	13.648	-2.92593	0.00367859	0.0540484	-2.07087	2.43432	-2.43432
GGT5	0.311813	0.101989	0.521637	4.68061	2.92365	0.00370491	0.0543778	-2.07705	2.43122	2.43122
FGL1	-0.203163	-0.339892	-0.0664346	4.61823	-2.92328	0.00370916	0.0543828	-2.07804	2.43072	-2.43072
CAVIN2	-0.267927	-0.448392	-0.087461	4.23737	-2.92083	0.00373767	0.054493	-2.08468	2.4274	-2.4274
DENND2A	0.438328	0.143117	0.733538	7.57739	2.92113	0.00373414	0.054493	-2.08386	2.42781	2.42781
GOLPH3	0.20083	0.0655329	0.336128	9.28411	2.92028	0.00374409	0.054493	-2.08617	2.42665	2.42665
SEMA5A	0.514437	0.167907	0.860968	8.63813	2.92063	0.00374003	0.054493	-2.08523	2.42713	2.42713
SLC35A5	0.249212	0.081379	0.417044	8.56449	2.9213	0.00373214	0.054493	-2.0834	2.42804	2.42804
TMX2	0.220245	0.0719165	0.368573	10.2157	2.92123	0.00373297	0.054493	-2.08359	2.42795	2.42795
ZBTB5	-0.245641	-0.411127	-0.0801553	7.47912	-2.92028	0.00374408	0.054493	-2.08616	2.42665	-2.42665
WEE1	0.403473	0.131616	0.675331	8.8769	2.91983	0.00374933	0.0545122	-2.08738	2.42605	2.42605
FTL	0.177801	0.0579444	0.297657	13.1071	2.91848	0.00376518	0.0546181	-2.09103	2.42421	2.42421
FTLP3	0.177801	0.0579444	0.297657	13.1071	2.91848	0.00376518	0.0546181	-2.09103	2.42421	2.42421
IFITM2	0.36352	0.11839	0.60865	10.2851	2.91754	0.00377624	0.0546181	-2.09358	2.42294	2.42294
MTMR1	-0.194373	-0.325439	-0.0633078	9.11855	-2.91765	0.003775	0.0546181	-2.09329	2.42308	-2.42308
UGCG	0.30605	0.0996779	0.512423	9.31113	2.9176	0.00377556	0.0546181	-2.09342	2.42302	2.42302
CEP131	-0.160734	-0.269162	-0.0523073	5.12479	-2.91646	0.00378907	0.0546267	-2.09651	2.42147	-2.42147
NHLH2	-0.425733	-0.71295	-0.138516	4.43784	-2.91616	0.00379254	0.0546267	-2.09731	2.42107	-2.42107
RPH3AL	-0.144182	-0.241433	-0.0469313	4.01497	-2.91677	0.00378534	0.0546267	-2.09566	2.4219	-2.4219
TP53TG5	-0.10051	-0.168308	-0.0327114	3.86697	-2.91658	0.00378766	0.0546267	-2.09619	2.42163	-2.42163
FBXW4P1	-0.180033	-0.301511	-0.0585539	4.04298	-2.91565	0.00379858	0.0546571	-2.09869	2.42038	-2.42038
DUSP3	0.208362	0.0677412	0.348982	8.38459	2.9151	0.00380511	0.0546945	-2.10017	2.41963	2.41963
VOPP1	0.471274	0.153159	0.789389	10.3584	2.91457	0.00381146	0.0547293	-2.10162	2.41891	2.41891
MIR6777	0.309288	0.100425	0.518152	6.90361	2.9133	0.00382656	0.054833	-2.10504	2.41719	2.41719
SREBF1	0.309288	0.100425	0.518152	6.90361	2.9133	0.00382656	0.054833	-2.10504	2.41719	2.41719
PIGB	0.296381	0.0961162	0.496646	5.84324	2.91159	0.00384702	0.0549563	-2.10966	2.41487	2.41487
RFX5	-0.202202	-0.338825	-0.0655793	7.67412	-2.9117	0.00384569	0.0549563	-2.10936	2.41503	-2.41503
TRANK1	0.227264	0.0737129	0.380816	4.61868	2.91181	0.00384447	0.0549563	-2.10909	2.41516	2.41516
KIFC1	-0.30542	-0.511825	-0.0990139	6.03612	-2.91112	0.00385269	0.0549809	-2.11094	2.41424	-2.41424
AMELY	-0.109714	-0.183917	-0.035511	3.96109	-2.90888	0.00387973	0.0552533	-2.11699	2.4112	-2.4112
LGALS3BP	0.325072	0.105221	0.544924	9.30275	2.90894	0.00387894	0.0552533	-2.11682	2.41129	2.41129
FCGR2B	0.548046	0.177214	0.918878	6.85635	2.90753	0.00389601	0.05527	-2.12062	2.40938	2.40938
LRP1	0.387864	0.125419	0.650309	7.71202	2.90755	0.00389585	0.05527	-2.12058	2.4094	2.4094
RARG	-0.151655	-0.254273	-0.0490361	4.76826	-2.90747	0.00389679	0.05527	-2.12079	2.40929	-2.40929
USP5	-0.142796	-0.23942	-0.0461725	4.99812	-2.90749	0.00389655	0.05527	-2.12074	2.40932	-2.40932
CSHL1	-0.140495	-0.235615	-0.0453754	3.94436	-2.90586	0.00391632	0.0554246	-2.12512	2.40712	-2.40712
MAP3K10	-0.158995	-0.266631	-0.0513581	5.14461	-2.90608	0.00391364	0.0554246	-2.12453	2.40742	-2.40742
NOS3	-0.0874153	-0.146606	-0.0282247	3.80744	-2.90549	0.00392087	0.0554246	-2.12613	2.40662	-2.40662
PDIA4	0.315535	0.101863	0.529207	8.66598	2.90526	0.00392362	0.0554246	-2.12674	2.40631	2.40631
[truncated: 12,929 more rows]

## Sheet: Supplementary-1F
Validation dataset2 - LIMMA OF GSE16011
[truncated: 21,817 more rows]
